# Supplementary material for: Reduction of nitrite to nitric oxide and generation of reactive chalcogen species by mononuclear Fe(ii) and Zn(ii) complexes of thiolate and selenolate
Source: Royal Society of Chemistry journal article supplement (doi:10.1039/d3dt03768a), 2023-12-11
Supplement: d3dt03768a1.pdf [file d3dt03768a1.pdf]

## **Supporting Information**

### **Reduction of Nitrite to Nitric Oxide and Generation of Reactive Chalcogen Species by Mononuclear Fe(II) and Zn(II) Complexes of Thiolate and Selenolate**

Sayan Atta, Amit Mandal, Rahul Saha, and Amit Majumdar\*

School of Chemical Sciences, Indian Association for the Cultivation of Science, 2A & 2B Raja S. C. Mullick Road, Kolkata 700032, India.

\*Corresponding author email: [icam@iacs.res.in](mailto:icam@iacs.res.in)

| Contents                                                                                                                                                                                                                                                                                                                                                          | Page number |
|-------------------------------------------------------------------------------------------------------------------------------------------------------------------------------------------------------------------------------------------------------------------------------------------------------------------------------------------------------------------|-------------|
| <b>Experimental procedures</b>                                                                                                                                                                                                                                                                                                                                    | S10-S22     |
| <b>Table S1.</b> Unit cell parameters for $5^{Zn}(BF_4)_2$ obtained from different reactions.                                                                                                                                                                                                                                                                     | S23         |
| <b>Table S2.</b> Unit cell parameters for $1a^{Zn}$ obtained from different reactions.                                                                                                                                                                                                                                                                            | S24         |
| <b>Table S3.</b> Unit cell parameters for $2^{Zn}$ obtained from different reactions.                                                                                                                                                                                                                                                                             | S24         |
| <b>Table S4.</b> Unit cell parameters for $3^{Zn}$ obtained from different reactions.                                                                                                                                                                                                                                                                             | S24         |
| <b>Table S5.</b> Unit cell parameters for $5^{Fe}(BPh_4)_2$ obtained from different reactions.                                                                                                                                                                                                                                                                    | S25         |
| <b>Table S6.</b> Unit cell parameters for $8^{Fe}$ obtained from different reactions.                                                                                                                                                                                                                                                                             | S26         |
| <b>Table S7.</b> Unit cell parameters for $1a^{Fe}$ obtained from different reactions.                                                                                                                                                                                                                                                                            | S26         |
| <b>Table S8.</b> Unit cell parameters for $2^{Fe}$ obtained from different reactions.                                                                                                                                                                                                                                                                             | S26         |
| <b>Table S9.</b> Yields (GC) of products obtained by the transfer of reactive sulfur / selenium species (generated <i>in situ</i> by selected Zn(II) and Fe(II) compounds and elemental sulfur/selenium).                                                                                                                                                         | S27         |
| <b>Table S10.</b> X-ray crystallographic data for compounds $1a^{Zn}$ , $1b^{Zn}$ , $2^{Zn}$ , $3^{Zn}$ , $4^{Zn}$ , $5^{Zn}(BF_4)_2$ , $6^{Zn}$ and $7^{Zn}$ . <sup>a</sup>                                                                                                                                                                                      | S28         |
| <b>Table S11.</b> X-ray crystallographic data for compounds $1a^{Fe}$ , $1b^{Fe}$ , $2^{Fe}$ , $5^{Fe}(BPh_4)_2$ and $8^{Fe}$ . <sup>a</sup>                                                                                                                                                                                                                      | S29         |
| <b>Figure S1.</b> $^1H$ NMR (300 MHz, DMSO- $d^6$ ) spectrum of [(Py2ald)Zn(SPh)] ( $1a^{Zn}$ ).                                                                                                                                                                                                                                                                  | S30         |
| <b>Figure S2.</b> $^{13}C$ NMR (75 MHz, DMSO- $d^6$ ) spectrum of [(Py2ald)Zn(SPh)] ( $1a^{Zn}$ ).                                                                                                                                                                                                                                                                | S30         |
| <b>Figure S3.</b> $^1H$ NMR (600 MHz, DMSO- $d^6$ ) spectrum of [(Py2ald)Zn(SC <sub>6</sub> H <sub>4</sub> -2,6-Me <sub>2</sub> )] ( $1b^{Zn}$ ).                                                                                                                                                                                                                 | S31         |
| <b>Figure S4.</b> $^{13}C$ NMR (150 MHz, DMSO- $d^6$ ) spectrum of [(Py2ald)Zn(SC <sub>6</sub> H <sub>4</sub> -2,6-Me <sub>2</sub> )] ( $1b^{Zn}$ ).                                                                                                                                                                                                              | S31         |
| <b>Figure S5.</b> $^1H$ NMR (600 MHz, DMSO- $d^6$ ) spectrum of [(Py2ald)Zn(SePh)] ( $2^{Zn}$ ).                                                                                                                                                                                                                                                                  | S32         |
| <b>Figure S6.</b> $^{13}C$ NMR (151 MHz, DMSO- $d^6$ ) spectrum of [(Py2ald)Zn(SePh)] ( $2^{Zn}$ ).                                                                                                                                                                                                                                                               | S32         |
| <b>Figure S7.</b> $^1H$ NMR (400 MHz, DMSO- $d^6$ ) spectrum of [(Py2ald)Zn(ONO)] ( $3^{Zn}$ ).                                                                                                                                                                                                                                                                   | S33         |
| <b>Figure S8.</b> $^{13}C$ NMR (150 MHz, DMSO- $d^6$ ) spectrum of [(Py2ald)Zn(ONO)] ( $3^{Zn}$ ).                                                                                                                                                                                                                                                                | S33         |
| <b>Figure S9.</b> $^1H$ NMR (400 MHz, CDCl <sub>3</sub> ) spectrum of [(Py2ald)Zn(Br) <sub>2</sub> ] ( $4^{Zn}$ ).                                                                                                                                                                                                                                                | S34         |
| <b>Figure S10.</b> $^{13}C$ NMR (150 MHz, CDCl <sub>3</sub> ) spectrum of [(Py2ald)Zn(Br) <sub>2</sub> ] ( $4^{Zn}$ ).                                                                                                                                                                                                                                            | S34         |
| <b>Figure S11.</b> $^1H$ NMR (600 MHz, DMSO- $d^6$ ) spectrum of [(Py2ald)Zn] <sub>2</sub> (BF <sub>4</sub> ) <sub>2</sub> ( $5^{Zn}(BF_4)_2$ ).                                                                                                                                                                                                                  | S35         |
| <b>Figure S12.</b> $^{13}C$ NMR (75 MHz, DMSO- $d^6$ ) spectrum of [(Py2ald)Zn] <sub>2</sub> (BF <sub>4</sub> ) <sub>2</sub> ( $5^{Zn}(BF_4)_2$ ).                                                                                                                                                                                                                | S35         |
| <b>Figure S13.</b> $^1H$ NMR (400 MHz, DMSO- $d^6$ ) spectrum of [(Py2ald)Zn(Br)] ( $6^{Zn}$ ).                                                                                                                                                                                                                                                                   | S36         |
| <b>Figure S14.</b> $^{13}C$ NMR (150 MHz, DMSO- $d^6$ ) spectrum of [(Py2ald)Zn(Br)] ( $6^{Zn}$ ).                                                                                                                                                                                                                                                                | S36         |
| <b>Figure S15.</b> $^1H$ NMR (600 MHz, CDCl <sub>3</sub> ) spectrum of [(Py2ald)Zn(mnt)] ( $7^{Zn}$ ).                                                                                                                                                                                                                                                            | S37         |
| <b>Figure S16.</b> $^1H$ NMR (400 MHz, CD <sub>3</sub> OD) spectrum of [(Py2ald)Zn(mnt)] ( $7^{Zn}$ ).                                                                                                                                                                                                                                                            | S37         |
| <b>Figure S17.</b> $^{13}C$ NMR (150 MHz, CDCl <sub>3</sub> ) spectrum of [(Py2ald)Zn(mnt)] ( $7^{Zn}$ ).                                                                                                                                                                                                                                                         | S38         |
| <b>Figure S18.</b> Mass spectrometric data (in MeCN) for [(Py2ald)Zn] <sub>2</sub> (BF <sub>4</sub> ) <sub>2</sub> ( $5^{Zn}(BF_4)_2$ ) shows the presence of [(Py2ald)Zn] <sup>+</sup> (m/z: 410.0847, simulated data, orange line; 410.0846, observed data, green line).                                                                                        | S38         |
| <b>Figure S19.</b> Mass spectrometric data (in MeCN) for [(Py2ald)Fe] <sub>2</sub> (BF <sub>4</sub> ) <sub>2</sub> ( $5^{Fe}(BF_4)_2$ ) shows the presence of [(Py2ald)Fe] <sup>+</sup> (m/z: 402.0905, simulated data, orange line; 402.0904, observed data, green line).                                                                                        | S39         |
| <b>Figure S20.</b> Mass spectrometric data (in MeCN) for [(Py2ald)Fe] <sub>2</sub> (BPh <sub>4</sub> ) <sub>2</sub> ( $5^{Fe}(BPh_4)_2$ ) shows the presence of [(Py2ald)Fe] <sup>+</sup> (m/z: 402.0905, simulated data, orange line; 402.0902, observed data, green line).                                                                                      | S39         |
| <b>Figure S21.</b> IR spectra (ATR) of [(Py2ald)Zn(ONO)] ( $3^{Zn}$ ) along with that of [(Py2ald)Zn] <sub>2</sub> (BF <sub>4</sub> ) <sub>2</sub> ( $5^{Zn}(BF_4)_2$ ) used as a control.                                                                                                                                                                        | S40         |
| <b>Figure S22.</b> IR spectra (KBr pellet) of [(Py2ald)Zn(mnt)] ( $7^{Zn}$ ) shows $\nu_{O-H}$ (H-bonded) = 3485 cm <sup>-1</sup> , $\nu_{CN}$ = 2195 cm <sup>-1</sup> and $\nu_{CHO}$ = 1652 cm <sup>-1</sup> .                                                                                                                                                  | S40         |
| <b>Figure S23.</b> Electronic absorption spectroscopic signatures for the iron compounds in CH <sub>2</sub> Cl <sub>2</sub> (0.25 mM).                                                                                                                                                                                                                            | S41         |
| <b>Figure S24.</b> $^1H$ NMR (400 MHz, DMSO- $d^6$ ) spectrum of [(Py2ald)Fe(SPh)] ( $1a^{Fe}$ ).                                                                                                                                                                                                                                                                 | S41         |
| <b>Figure S25.</b> $^1H$ NMR (400 MHz, DMSO- $d^6$ ) spectrum of [(Py2ald)Fe(SPh)] ( $1a^{Fe}$ ), recorded in a coaxial NMR tube, with DMSO- $d^6$ inside. Inset shows a shift in the peak of DMSO- $d^6$ . Solution magnetic moment ( $\mu_{eff}$ ) = 4.63 BM (calculated spin only magnetic moment = 4.90 BM).                                                  | S42         |
| <b>Figure S26.</b> $^1H$ NMR (400 MHz, DMSO- $d^6$ ) spectrum of [(Py2ald)Fe(SC <sub>6</sub> H <sub>4</sub> -2,6-Me <sub>2</sub> )] ( $1b^{Fe}$ ).                                                                                                                                                                                                                | S42         |
| <b>Figure S27.</b> $^1H$ NMR (400 MHz, DMSO- $d^6$ ) spectrum of [(Py2ald)Fe(SC <sub>6</sub> H <sub>4</sub> -2,6-Me <sub>2</sub> )] ( $1b^{Fe}$ ), recorded in a coaxial NMR tube, with DMSO- $d^6$ inside. Inset shows a shift in the peak of DMSO- $d^6$ . Solution magnetic moment ( $\mu_{eff}$ ) = 4.71 BM (calculated spin only magnetic moment = 4.90 BM). | S43         |
| <b>Figure S28.</b> $^1H$ NMR (400 MHz, DMSO- $d^6$ ) spectrum of [(Py2ald)Fe(SePh)] ( $2^{Fe}$ ).                                                                                                                                                                                                                                                                 | S43         |

| Contents                                                                                                                                                                                                                                                                                                                                                                                                                                                                                               | Page number |
|--------------------------------------------------------------------------------------------------------------------------------------------------------------------------------------------------------------------------------------------------------------------------------------------------------------------------------------------------------------------------------------------------------------------------------------------------------------------------------------------------------|-------------|
| <b>Figure S29.</b> <sup>1</sup> H NMR (400 MHz, DMSO-d <sup>6</sup> ) spectrum of [(Py2ald)Fe(SePh)] ( <b>2</b> <sup>Fe</sup> ) recorded in a coaxial NMR tube, with DMSO-d <sup>6</sup> inside. Inset shows a shift in the peak of DMSO-d <sup>6</sup> . Solution magnetic moment ( $\mu_{\text{eff}}$ ) = 4.79 BM (calculated spin only magnetic moment = 4.90 BM).                                                                                                                                  | S44         |
| <b>Figure S30.</b> <sup>1</sup> H NMR (400 MHz, DMSO-d <sup>6</sup> ) spectrum of [(Py2ald)Fe] <sub>2</sub> (BF <sub>4</sub> ) <sub>2</sub> ( <b>5</b> <sup>Fe</sup> (BF <sub>4</sub> ) <sub>2</sub> ).                                                                                                                                                                                                                                                                                                | S44         |
| <b>Figure S31.</b> <sup>1</sup> H NMR (400 MHz, DMSO-d <sup>6</sup> ) spectrum of [(Py2ald)Fe] <sub>2</sub> (BF <sub>4</sub> ) <sub>2</sub> ( <b>5</b> <sup>Fe</sup> (BF <sub>4</sub> ) <sub>2</sub> ) recorded in a coaxial NMR tube, with DMSO-d <sup>6</sup> inside, inset shows a shift in the peak of DMSO-d <sup>6</sup> . Solution magnetic moment ( $\mu_{\text{eff}}$ ) = 8.52 BM (calculated spin only magnetic moment = 8.94 BM).                                                           | S45         |
| <b>Figure S32.</b> <sup>1</sup> H NMR (400 MHz, DMSO-d <sup>6</sup> ) spectrum of [(Py2ald)Fe] <sub>2</sub> (BPh <sub>4</sub> ) <sub>2</sub> ( <b>5</b> <sup>Fe</sup> (BPh <sub>4</sub> ) <sub>2</sub> ).                                                                                                                                                                                                                                                                                              | S45         |
| <b>Figure S33.</b> <sup>1</sup> H NMR (400 MHz, DMSO-d <sup>6</sup> ) spectrum of [(Py2ald)Fe] <sub>2</sub> (BPh <sub>4</sub> ) <sub>2</sub> ( <b>5</b> <sup>Fe</sup> (BPh <sub>4</sub> ) <sub>2</sub> ), recorded in a coaxial NMR tube, with DMSO-d <sup>6</sup> inside, inset shows a shift in the peak of DMSO-d <sup>6</sup> . Solution magnetic moment ( $\mu_{\text{eff}}$ ) = 8.62 BM (calculated spin only magnetic moment = 8.94 BM).                                                        | S46         |
| <b>Figure S34.</b> <sup>1</sup> H NMR (400 MHz, DMSO-d <sup>6</sup> ) spectrum of [ {(Py2ald)(ONO)Fe} <sub>2</sub> - $\mu_2$ -O] ( <b>8</b> <sup>Fe</sup> ).                                                                                                                                                                                                                                                                                                                                           | S46         |
| <b>Figure S35.</b> <sup>1</sup> H NMR (400 MHz, DMSO-d <sup>6</sup> ) spectrum of [ {(Py2ald)(ONO)Fe} <sub>2</sub> - $\mu_2$ -O] ( <b>8</b> <sup>Fe</sup> ), recorded in a coaxial NMR tube, with DMSO-d <sup>6</sup> inside, inset shows a shift in the peak of water. Solution magnetic moment ( $\mu_{\text{eff}}$ ) = 2.43 BM (calculated spin only magnetic moment considering 10 unpaired electrons = 10.95 BM and calculated spin only magnetic moment for only two unpaired electron is 2.83). | S47         |
| <b>Figure S36.</b> Mass spectrometric data (in MeCN) for [(Py2ald)Zn] <sub>2</sub> (BF <sub>4</sub> ) <sub>2</sub> ( <b>5</b> <sup>Zn</sup> (BF <sub>4</sub> ) <sub>2</sub> ) obtained from the reaction of [(Py2ald)Zn(SPh)] ( <b>1a</b> <sup>Zn</sup> ) with 1 equiv of (Cp <sub>2</sub> Fe)(BF <sub>4</sub> ), shows the presence of [(Py2ald)Zn] <sup>+</sup> (m/z: 410.0847, simulated data, orange line; 410.0845, observed data, green line).                                                   | S47         |
| <b>Figure S37.</b> <sup>1</sup> H NMR (300 MHz, DMSO-d <sup>6</sup> ) spectrum of [(Py2ald)Zn] <sub>2</sub> (BF <sub>4</sub> ) <sub>2</sub> ( <b>5</b> <sup>Zn</sup> (BF <sub>4</sub> ) <sub>2</sub> ) obtained from the reaction [(Py2ald)Zn(SPh)] ( <b>1a</b> <sup>Zn</sup> ) with 1 equiv of (Cp <sub>2</sub> Fe)(BF <sub>4</sub> ).                                                                                                                                                                | S48         |
| <b>Figure S38.</b> GC-MS data for the identification and yield (31%) calculation of diphenyl disulfide produced in the reaction of [(Py2ald)Zn(SPh)] ( <b>1a</b> <sup>Zn</sup> ) with 1 equiv of (Cp <sub>2</sub> Fe)(BF <sub>4</sub> ).                                                                                                                                                                                                                                                               | S48         |
| <b>Figure S39.</b> Mass spectrometric data (in MeCN) for [(Py2ald)Zn] <sub>2</sub> (BF <sub>4</sub> ) <sub>2</sub> ( <b>5</b> <sup>Zn</sup> (BF <sub>4</sub> ) <sub>2</sub> ) obtained from the reaction of [(Py2ald)Zn(ONO)] ( <b>3</b> <sup>Zn</sup> ) with 1 equiv of PhSH shows the presence of [(Py2ald)Zn] <sup>+</sup> (m/z: 410.0847, simulated data, green line; 410.0844, observed data, purple line).                                                                                       | S49         |
| <b>Figure S40.</b> <sup>1</sup> H NMR (400 MHz, DMSO-d <sup>6</sup> ) spectrum of [(Py2ald)Zn] <sub>2</sub> (BF <sub>4</sub> ) <sub>2</sub> ( <b>5</b> <sup>Zn</sup> (BF <sub>4</sub> ) <sub>2</sub> ) obtained from the reaction of [(Py2ald)Zn(ONO)] ( <b>3</b> <sup>Zn</sup> ) with 1 equiv of PhSH.                                                                                                                                                                                                | S49         |
| <b>Figure S41.</b> GC-MS data shows that no diphenyldisulfide was generated in the reaction of [(Py2ald)Zn(ONO)] ( <b>3</b> <sup>Zn</sup> ) with 1 equiv of NaSPh.                                                                                                                                                                                                                                                                                                                                     | S50         |
| <b>Figure S42.</b> GC-MS data for the identification and yield (32%) calculation of diphenyldisulfide produced in the reaction of [(Py2ald)Zn(ONO)] ( <b>3</b> <sup>Zn</sup> ) with 1 equiv of PhSH.                                                                                                                                                                                                                                                                                                   | S50         |
| <b>Figure S43.</b> <sup>1</sup> H NMR (400 MHz, DMSO-d <sup>6</sup> ) spectrum of [(Py2ald)Zn(SPh)] ( <b>1a</b> <sup>Zn</sup> ) obtained from the reaction of [(Py2ald)Zn(ONO)] ( <b>3</b> <sup>Zn</sup> ) with 2 equiv of PhSH.                                                                                                                                                                                                                                                                       | S51         |
| <b>Figure S44.</b> GC-MS data for the identification and yield (38%) calculation of diphenyldisulfide produced in the reaction of [(Py2ald)Zn(ONO)] ( <b>3</b> <sup>Zn</sup> ) with 2 equiv of PhSH.                                                                                                                                                                                                                                                                                                   | S51         |
| <b>Figure S45.</b> IR spectra of [(TPP)Co(NO)] ( $\nu_{\text{NO}} = 1696 \text{ cm}^{-1}$ ) generated by the trapping of NO gas (generated by the reaction of [(Py2ald)Zn(ONO)] ( <b>3</b> <sup>Zn</sup> ) with PhSH, PhCH <sub>2</sub> SH and PhSeH) by (TPP)Co <sup>II</sup> .                                                                                                                                                                                                                       | S52         |
| <b>Figure S46.</b> <sup>1</sup> H NMR (400 MHz, CDCl <sub>3</sub> ) spectra of (TPP)Co <sup>II</sup> after trapping the NO gas generated by the reaction of [(Py2ald)Zn(ONO)] ( <b>3</b> <sup>Zn</sup> ) with (a) <sup>t</sup> BuSH (2 equiv), (b) PhCH <sub>2</sub> SH (2 equiv), (c) PhSH (1 equiv), (d) PhSH (2equiv) and (e) PhSeH (2 equiv).                                                                                                                                                      | S53         |
| <b>Figure S47.</b> <sup>1</sup> H NMR (400 MHz, DMSO-d <sup>6</sup> ) spectrum of [(Py2ald)Zn(SePh)] ( <b>2</b> <sup>Zn</sup> ) obtained from the reaction of [(Py2ald)Zn(ONO)] ( <b>3</b> <sup>Zn</sup> ) with 2 equiv of PhSeH.                                                                                                                                                                                                                                                                      | S54         |
| <b>Figure S48.</b> Gas chromatographic data for the identification and yield calculation (35%) of diphenyldiselenide produced in the reaction of [(Py2ald)Zn(ONO)] ( <b>3</b> <sup>Zn</sup> ) with 2 equiv of PhSeH.                                                                                                                                                                                                                                                                                   | S54         |
| <b>Figure S49.</b> <sup>1</sup> H NMR (400 MHz, DMSO-d <sup>6</sup> ) spectrum of [(Py2ald)Zn] <sub>2</sub> (BF <sub>4</sub> ) <sub>2</sub> ( <b>5</b> <sup>Zn</sup> (BF <sub>4</sub> ) <sub>2</sub> ) obtained from the reaction of [(Py2ald)Zn(ONO)] ( <b>3</b> <sup>Zn</sup> ) and 2 equiv of PhCH <sub>2</sub> SH.                                                                                                                                                                                 | S55         |
| <b>Figure S50.</b> Mass spectrometric data (in MeCN) for [(Py2ald)Zn] <sub>2</sub> (BF <sub>4</sub> ) <sub>2</sub> ( <b>5</b> <sup>Zn</sup> (BF <sub>4</sub> ) <sub>2</sub> ) obtained from the reaction of [(Py2ald)Zn(ONO)] ( <b>3</b> <sup>Zn</sup> ) and 2 equiv of PhCH <sub>2</sub> SH shows the presence of [(Py2ald)Zn] <sup>+</sup> (m/z: 410.0847, simulated data, green line; 410.0842, observed data, purple line).                                                                        | S55         |
| <b>Figure S51.</b> Gas chromatographic data for the identification and yield calculation of dibenzylidisulfide produced in the reaction of [(Py2ald)Zn(ONO)] ( <b>3</b> <sup>Zn</sup> ) with 2 equiv of PhCH <sub>2</sub> SH. Yields: 32% (PhCH <sub>2</sub> S-SCH <sub>2</sub> Ph), 53% (unreacted PhCH <sub>2</sub> SH).                                                                                                                                                                             | S56         |

| Contents                                                                                                                                                                                                                                                                                                                                                                                                                                 | Page number |
|------------------------------------------------------------------------------------------------------------------------------------------------------------------------------------------------------------------------------------------------------------------------------------------------------------------------------------------------------------------------------------------------------------------------------------------|-------------|
| <b>Figure S52.</b> $^1\text{H}$ NMR (400 MHz, DMSO- $d_6$ ) spectrum of the unreacted [(Py2ald)Zn(ONO)] ( $3^{\text{Zn}}$ ) obtained from the reaction of $3^{\text{Zn}}$ with 2 equiv of $^7\text{BuSH}$ . Note that the yield of NO in this reaction was only 9% .                                                                                                                                                                     | S56         |
| <b>Figure S53.</b> Cyclic voltammograms of $1\text{a}^{\text{Fe}}$ (a) $1\text{b}^{\text{Fe}}$ (b), $2^{\text{Fe}}$ (c), $5^{\text{Fe}}$ (d), and $8^{\text{Fe}}$ (e) in $\text{CH}_2\text{Cl}_2$ (multiple scans, scan rate = 100 mV/scan). See Figure S54 for the cyclic voltammograms of Zn(II) complexes which helped to identify the redox events related with the Py2ald $^{1-}$ ligand.                                           | S57         |
| <b>Figure S54.</b> Cyclic voltammograms of $1\text{a}^{\text{Zn}}$ (a) $1\text{b}^{\text{Zn}}$ (b), $2^{\text{Zn}}$ (c), $5^{\text{Zn}}$ (d), and $3^{\text{Zn}}$ (e) in $\text{CH}_2\text{Cl}_2$ (multiple scans, scan rate = 100 mV/scan).                                                                                                                                                                                             | S58         |
| <b>Figure S55.</b> Mass spectrometric data (in MeCN) for [(Py2ald)Fe] $_2$ (BPh $_4$ ) $_2$ ( $5^{\text{Fe}}$ (BPh $_4$ ) $_2$ ) obtained from the reaction between [(Py2ald)Fe(SPh)] ( $1\text{a}^{\text{Fe}}$ ) with 1 equiv of (Cp $_2$ Fe)(BF $_4$ ) in the presence of NaBPh $_4$ , shows the presence of [(Py2ald)Fe] $^+$ (m/z: 402.0905, simulated data, orange line; 402.0928, observed data, green line).                      | S59         |
| <b>Figure S56.</b> Mass spectrometric data (in MeCN) for [(Py2ald)Fe] $_2$ (BPh $_4$ ) $_2$ ( $5^{\text{Fe}}$ (BPh $_4$ ) $_2$ ) obtained from the reaction between [(Py2ald)Fe(SePh)] ( $2^{\text{Fe}}$ ) with 1 equiv of (Cp $_2$ Fe)(BF $_4$ ) in the presence of NaBPh $_4$ , shows the presence of [(Py2ald)Fe] $^+$ (m/z: 402.0905, simulated data, orange line; 402.0872, observed data, green line).                             | S59         |
| <b>Figure S57.</b> GC-MS data for the identification and yield (33%) calculation of diphenyl disulfide produced in the reaction of [(Py2ald)Fe(SPh)] ( $1\text{a}^{\text{Fe}}$ ) with 1 equiv of (Cp $_2$ Fe)(BF $_4$ ) in the presence of NaBPh $_4$ .                                                                                                                                                                                  | S60         |
| <b>Figure S58.</b> GC-MS data for the identification and yield (34%) calculation of diphenyl diselenide produced in the reaction of [(Py2ald)Fe(SePh)] ( $2^{\text{Fe}}$ ) with 1 equiv of (Cp $_2$ Fe)(BF $_4$ ) in the presence of NaBPh $_4$ .                                                                                                                                                                                        | S60         |
| <b>Figure S59.</b> Mass spectrometric data (in MeCN) for [(Py2ald)Fe] $_2$ (BPh $_4$ ) $_2$ ( $5^{\text{Fe}}$ (BPh $_4$ ) $_2$ ) obtained from the reaction of [(Py2ald)Fe(S-C $_6$ H $_4$ -2,6-Me $_2$ )] ( $1\text{b}^{\text{Fe}}$ ) with 1 equiv of (Cp $_2$ Fe)(BF $_4$ ) in the presence of NaBPh $_4$ , shows the presence of [(Py2ald)Fe] $^+$ (m/z: 402.0905, simulated data, orange line; 402.0916, observed data, green line). | S61         |
| <b>Figure S60.</b> GC-MS for the identification and yield (33%) calculation of 1, 2-bis(2,6-dimethylphenyl)disulfide produced in the reaction of [(Py2ald)Fe(S-C $_6$ H $_4$ -2,6-Me $_2$ )] ( $1\text{b}^{\text{Fe}}$ ) with 1 equiv of (Cp $_2$ Fe)(BF $_4$ ) in the presence of NaBPh $_4$ .                                                                                                                                          | S61         |
| <b>Figure S61.</b> IR spectra of [(TPP)Co(NO)] ( $\nu_{\text{NO}} = 1696 \text{ cm}^{-1}$ ) obtained by the trapping of NO gas which was generated by the reaction of [(Py2ald)Fe] $_2$ (BF $_4$ ) $_2$ ( $5^{\text{Fe}}$ (BF $_4$ ) $_2$ ) and [(Py2ald)Fe(EPh)] (E = S, $1\text{a}^{\text{Fe}}$ , E = Se, $2^{\text{Fe}}$ ) with 4 and 3 equiv of (Bu $_4$ N)(NO $_2$ ), respectively.                                                 | S62         |
| <b>Figure S62.</b> $^1\text{H}$ NMR (400 MHz, CDCl $_3$ ) spectra of (TPP)Co $^{\text{II}}$ after trapping the NO gas which was generated by the reaction of [(Py2ald)Fe] $_2$ (BF $_4$ ) $_2$ ( $5^{\text{Fe}}$ (BF $_4$ ) $_2$ ) and [(Py2ald)Fe(EPh)] (E = S, $1\text{a}^{\text{Fe}}$ , E = Se, $2^{\text{Fe}}$ ) with 4 and 3 equiv of (Bu $_4$ N)(NO $_2$ ), respectively.                                                          | S63         |
| <b>Figure S63.</b> GC-MS data for the identification and yield (35%) calculation of diphenyldisulfide produced in the reaction of [(Py2ald)Fe(SPh)] ( $1\text{a}^{\text{Fe}}$ ) with 3 equiv of (Bu $_4$ N)(NO $_2$ ).                                                                                                                                                                                                                   | S64         |
| <b>Figure S64.</b> Gas chromatographic data for the identification and yield calculation of diphenyldiselenide (38%) produced in the reaction of [(Py2ald)Fe(SePh)] ( $2^{\text{Fe}}$ ) with 3 equiv of (Bu $_4$ N)(NO $_2$ ).                                                                                                                                                                                                           | S64         |
| <b>Figure S65.</b> IR spectra (ATR) of [ {(Py2ald)(ONO)Fe} $_{2-\mu_2}$ -O ] ( $8^{\text{Fe}}$ ) and the corresponding $^{15}\text{N}$ labelled compound, $8^{\text{Fe}}(^{15}\text{NO}_2)$ .                                                                                                                                                                                                                                            | S65         |
| <b>Figure S66.</b> Mass spectrometric data (in MeCN) for [(Py2ald)Fe] $_2$ (BF $_4$ ) $_2$ ( $5^{\text{Fe}}$ (BPh $_4$ ) $_2$ ) obtained from the reaction between [ {(Py2ald)(ONO)Fe} $_{2-\mu_2}$ -O ] ( $8^{\text{Fe}}$ ) and 4 equiv of Cp $_2$ Co shows the presence of [(Py2ald)Fe] $^+$ (m/z: 402.0905, simulated data, orange line; 402.0870, observed data, green line).                                                        | S66         |
| <b>Figure S67.</b> Mass spectrometric data (in MeCN) for [(Py2ald)Fe] $_2$ (BF $_4$ ) $_2$ ( $5^{\text{Fe}}$ (BPh $_4$ ) $_2$ ) obtained from the reaction between [ {(Py2ald)(ONO)Fe} $_{2-\mu_2}$ -O ] ( $8^{\text{Fe}}$ ) with 4 equiv of PhSH (in the presence of 2 equiv of NaBPh $_4$ ) shows the presence of [(Py2ald)Fe] $^+$ (m/z: 402.0905, simulated data, orange line; 402.0913, observed data, green line).                 | S66         |
| <b>Figure S68.</b> Mass spectrometric data (in MeCN) for [(Py2ald)Fe] $_2$ (BF $_4$ ) $_2$ ( $5^{\text{Fe}}$ (BPh $_4$ ) $_2$ ) obtained from the reaction between [ {(Py2ald)(ONO)Fe} $_{2-\mu_2}$ -O ] ( $8^{\text{Fe}}$ ) with 4 equiv of PhSeH (in the presence of 2 equiv of NaBPh $_4$ ) shows the presence of [(Py2ald)Fe] $^+$ (m/z:402.0905, simulated data, orange line; 402.0934, observed data, green line).                 | S67         |
| <b>Figure S69.</b> IR spectra of [(TPP)Co(NO)] ( $\nu_{\text{NO}} = 1696 \text{ cm}^{-1}$ ) obtained by the trapping of NO gas which was generated by the reaction of [ {(Py2ald)(ONO)Fe} $_{2-\mu_2}$ -O ] ( $8^{\text{Fe}}$ ) with 4 and 6 equiv of PhEH (E = S, Se).                                                                                                                                                                  | S68         |
| <b>Figure S70.</b> $^1\text{H}$ NMR (400 MHz, CDCl $_3$ ) spectra of (TPP)Co $^{\text{II}}$ after trapping the NO gas generated by the reaction of [ {(Py2ald)(ONO)Fe} $_{2-\mu_2}$ -O ] ( $8^{\text{Fe}}$ ) with 4 and 6 equiv of PhEH (E = S, Se).                                                                                                                                                                                     | S69         |

| Contents                                                                                                                                                                                                                                                             | Page number |
|----------------------------------------------------------------------------------------------------------------------------------------------------------------------------------------------------------------------------------------------------------------------|-------------|
| <b>Figure S71.</b> GC-MS data for the identification and yield calculation (1.34 equiv) of diphenyldisulfide produced in the reaction of [ $\{(\text{Py}2\text{ald})(\text{ONO})\text{Fe}\}_2-\mu_2\text{-O}$ ] ( $\mathbf{8}^{\text{Fe}}$ ) with 4 equiv PhSH.      | S70         |
| <b>Figure S72.</b> GC-MS data for the identification and yield calculation (1.32 equiv) of diphenyldiselenide produced in the reaction of [ $\{(\text{Py}2\text{ald})(\text{ONO})\text{Fe}\}_2-\mu_2\text{-O}$ ] ( $\mathbf{8}^{\text{Fe}}$ ) with 4 equiv PhSeH.    | S70         |
| <b>Figure S73.</b> GC-MS data for the identification and yield (1.41 equiv) calculation of diphenyldisulfide produced in the reaction of [ $\{(\text{Py}2\text{ald})(\text{ONO})\text{Fe}\}_2-\mu_2\text{-O}$ ] ( $\mathbf{8}^{\text{Fe}}$ ) with 6 equiv of PhSH.   | S71         |
| <b>Figure S74.</b> GC-MS data for the identification and yield calculation (1.41 equiv) of diphenyldiselenide produced in the reaction of [ $\{(\text{Py}2\text{ald})(\text{ONO})\text{Fe}\}_2-\mu_2\text{-O}$ ] ( $\mathbf{8}^{\text{Fe}}$ ) with 6 equiv of PhSeH. | S71         |
| <b>Figure S75.</b> GC-MS data for the identification and yield (58%) calculation of methylphenyl sulfide produced in the reaction of [(Py2ald)Zn(SPh)] ( $\mathbf{1a}^{\text{Zn}}$ ) with MeI in 1:1 ratio.                                                          | S72         |
| <b>Figure S76.</b> GC-MS data for the identification and yield (56%) calculation of benzyl(phenyl)sulfide produced in the reaction of [(Py2ald)Zn(SPh)] ( $\mathbf{1a}^{\text{Zn}}$ ) with PhCH <sub>2</sub> Br in 1:1 ratio.                                        | S72         |
| <b>Figure S77.</b> GC-MS data for the identification and yield (62%) calculation of S-phenyl ethanethioate produced in the reaction of [(Py2ald)Zn(SPh)] ( $\mathbf{1a}^{\text{Zn}}$ ) with MeCOCl in 1:1 ratio.                                                     | S73         |
| <b>Figure S78.</b> GC-MS data for the identification and yield (72%) calculation of S-phenyl benzothioate produced in the reaction of [(Py2ald)Zn(SPh)] ( $\mathbf{1a}^{\text{Zn}}$ ) with PhCOCl in 1:1 ratio.                                                      | S73         |
| <b>Figure S79.</b> Gas chromatographic data for the identification and yield (38%) calculation of bis(phenylthio)methane produced in the reaction of [(Py2ald)Zn(SPh)] ( $\mathbf{1a}^{\text{Zn}}$ ) with CH <sub>2</sub> Br <sub>2</sub> in 1:1 ratio.              | S74         |
| <b>Figure S80.</b> Gas chromatographic data for the identification and yield (69%) calculation of methylphenyl sulfide produced in the reaction of [(Py2ald)Fe(SPh)] ( $\mathbf{1a}^{\text{Fe}}$ ) with MeI in 1:1 ratio.                                            | S74         |
| <b>Figure S81.</b> GC-MS data for the identification and yield (88%) calculation of benzyl(phenyl)sulfide produced in the reaction of [(Py2ald)Fe(SPh)] ( $\mathbf{1a}^{\text{Fe}}$ ) with PhCH <sub>2</sub> Br in 1:1 ratio.                                        | S75         |
| <b>Figure S82.</b> GC-MS data for the identification and yield (62%) calculation of S-phenyl ethanethioate produced in the reaction of [(Py2ald)Fe(SPh)] ( $\mathbf{1a}^{\text{Fe}}$ ) with MeCOCl in 1:1 ratio.                                                     | S75         |
| <b>Figure S83.</b> GC-MS data for the identification and yield (83%) calculation of S-phenyl benzothioate produced in the reaction of [(Py2ald)Fe(SPh)] ( $\mathbf{1a}^{\text{Fe}}$ ) with PhCOCl in 1:1 ratio.                                                      | S76         |
| <b>Figure S84.</b> GC-MS data for the identification and yield (46%) calculation of bis(phenylthio)methane produced in the reaction of [(Py2ald)Fe(SPh)] ( $\mathbf{1a}^{\text{Fe}}$ ) with CH <sub>2</sub> Br <sub>2</sub> in 1:1 ratio.                            | S76         |
| <b>Figure S85.</b> GC-MS data for the identification and yield (33%) calculation of methyl(phenyl)selane produced in the reaction of [(Py2ald)Zn(SePh)] ( $\mathbf{2}^{\text{Zn}}$ ) with MeI in 1:1 ratio.                                                          | S77         |
| <b>Figure S86.</b> GC-MS data for the identification and yield (57%) calculation of benzyl(phenyl)selane produced in the reaction of [(Py2ald)Zn(SePh)] ( $\mathbf{2}^{\text{Zn}}$ ) with PhCH <sub>2</sub> Br in 1:1 ratio.                                         | S77         |
| <b>Figure S87.</b> GC-MS data for the identification and yield (45%) calculation of Se-phenyl ethaneselenoate produced in the reaction of [(Py2ald)Zn(SePh)] ( $\mathbf{2}^{\text{Zn}}$ ) with MeCOCl in 1:1 ratio.                                                  | S78         |
| <b>Figure S88.</b> GC-MS data for the identification and yield (57%) calculation of Se-phenyl benzoselenoate produced in the reaction of [(Py2ald)Zn(SePh)] ( $\mathbf{2}^{\text{Zn}}$ ) with PhCOCl in 1:1 ratio.                                                   | S78         |
| <b>Figure S89.</b> GC-MS data for the identification and yield (37%) calculation of bis(phenylselanyl)methane produced in the reaction of [(Py2ald)Zn(SePh)] ( $\mathbf{2}^{\text{Zn}}$ ) with CH <sub>2</sub> Br <sub>2</sub> in 1:1 ratio.                         | S79         |
| <b>Figure S90.</b> GC-MS data for the identification and yield (31%) calculation of methyl(phenyl)selane produced in the reaction of [(Py2ald)Fe(SePh)] ( $\mathbf{2}^{\text{Fe}}$ ) with MeI in 1:1 ratio.                                                          | S79         |
| <b>Figure S91.</b> GC-MS data for the identification and yield (70%) calculation of benzyl(phenyl)selane produced in the reaction of [(Py2ald)Fe(SePh)] ( $\mathbf{2}^{\text{Fe}}$ ) with PhCH <sub>2</sub> Br in 1:1 ratio.                                         | S80         |
| <b>Figure S92.</b> GC-MS data for the identification and yield (48%) calculation of Se-phenyl ethaneselenoate produced in the reaction of [(Py2ald)Fe(SePh)] ( $\mathbf{2}^{\text{Fe}}$ ) with MeCOCl in 1:1 ratio.                                                  | S80         |
| <b>Figure S93.</b> GC-MS data for the identification and yield (63%) calculation of Se-phenyl benzoselenoate produced in the reaction of [(Py2ald)Fe(SePh)] ( $\mathbf{2}^{\text{Fe}}$ ) with PhCOCl in 1:1 ratio.                                                   | S81         |

| Contents                                                                                                                                                                                                                                                                                                                                                                                                                                                    | Page number |
|-------------------------------------------------------------------------------------------------------------------------------------------------------------------------------------------------------------------------------------------------------------------------------------------------------------------------------------------------------------------------------------------------------------------------------------------------------------|-------------|
| <b>Figure S94.</b> GC-MS data for the identification and yield (44%) calculation of bis(phenylselanyl)methane produced in the reaction of [(Py2ald)Fe(SePh)] ( <b>2<sup>Fe</sup></b> ) with CH <sub>2</sub> Br <sub>2</sub> in 1:1 ratio.                                                                                                                                                                                                                   | S81         |
| <b>Figure 95.</b> <sup>1</sup> H NMR (600 MHz, DMSO-d <sub>6</sub> ) spectrum of [(Py2ald)Zn] <sub>2</sub> (BF <sub>4</sub> ) <sub>2</sub> ( <b>5<sup>Zn</sup></b> (BF <sub>4</sub> ) <sub>2</sub> ) obtained from the reaction of [(Py2ald)Zn(SPh)] ( <b>1a<sup>Zn</sup></b> ) with MeI in DMF.                                                                                                                                                            | S82         |
| <b>Figure S96.</b> <sup>1</sup> H NMR (600 MHz, DMSO-d <sub>6</sub> ) spectrum of [(Py2ald)Zn] <sub>2</sub> (BF <sub>4</sub> ) <sub>2</sub> ( <b>5<sup>Zn</sup></b> (BF <sub>4</sub> ) <sub>2</sub> ) obtained from the reaction of [(Py2ald)Zn(SPh)] ( <b>1a<sup>Zn</sup></b> ) with PhCH <sub>2</sub> Br in DMF.                                                                                                                                          | S82         |
| <b>Figure S97.</b> <sup>1</sup> H NMR (600 MHz, DMSO-d <sub>6</sub> ) spectrum of [(Py2ald)Zn] <sub>2</sub> (BF <sub>4</sub> ) <sub>2</sub> ( <b>5<sup>Zn</sup></b> (BF <sub>4</sub> ) <sub>2</sub> ) obtained from the reaction of [(Py2ald)Zn(SPh)] ( <b>1a<sup>Zn</sup></b> ) with MeC(O)Cl in DMF.                                                                                                                                                      | S83         |
| <b>Figure S98.</b> <sup>1</sup> H NMR (600 MHz, DMSO-d <sub>6</sub> ) spectrum of [(Py2ald)Zn] <sub>2</sub> (BF <sub>4</sub> ) <sub>2</sub> ( <b>5<sup>Zn</sup></b> (BF <sub>4</sub> ) <sub>2</sub> ) obtained from the reaction of [(Py2ald)Zn(SPh)] ( <b>1a<sup>Zn</sup></b> ) with PhC(O)Cl in MeCN.                                                                                                                                                     | S83         |
| <b>Figure S99.</b> <sup>1</sup> H NMR (600 MHz, DMSO-d <sub>6</sub> ) spectrum of [(Py2ald)Zn] <sub>2</sub> (BF <sub>4</sub> ) <sub>2</sub> ( <b>5<sup>Zn</sup></b> (BF <sub>4</sub> ) <sub>2</sub> ) obtained from the reaction of [(Py2ald)Zn(SPh)] ( <b>1a<sup>Zn</sup></b> ) with CH <sub>2</sub> Br <sub>2</sub> in DMF.                                                                                                                               | S84         |
| <b>Figure S100.</b> <sup>1</sup> H NMR (600 MHz, DMSO-d <sub>6</sub> ) spectrum of [(Py2ald)Zn] <sub>2</sub> (BF <sub>4</sub> ) <sub>2</sub> ( <b>5<sup>Zn</sup></b> (BF <sub>4</sub> ) <sub>2</sub> ) obtained from the reaction of [(Py2ald)Zn(SePh)] ( <b>2<sup>Zn</sup></b> ) with MeI in DMF solution.                                                                                                                                                 | S84         |
| <b>Figure S101.</b> <sup>1</sup> H NMR (600 MHz, DMSO-d <sub>6</sub> ) spectrum of [(Py2ald)Zn] <sub>2</sub> (BF <sub>4</sub> ) <sub>2</sub> ( <b>5<sup>Zn</sup></b> (BF <sub>4</sub> ) <sub>2</sub> ) obtained from the reaction of [(Py2ald)Zn(SePh)] ( <b>2<sup>Zn</sup></b> ) with PhCH <sub>2</sub> Br in DMF.                                                                                                                                         | S85         |
| <b>Figure S102.</b> <sup>1</sup> H NMR (600 MHz, DMSO-d <sub>6</sub> ) spectrum of [(Py2ald)Zn] <sub>2</sub> (BF <sub>4</sub> ) <sub>2</sub> ( <b>5<sup>Zn</sup></b> (BF <sub>4</sub> ) <sub>2</sub> ) obtained from the reaction of [(Py2ald)Zn(SePh)] ( <b>2<sup>Zn</sup></b> ) with MeC(O)Cl in DMF solution.                                                                                                                                            | S85         |
| <b>Figure S103.</b> <sup>1</sup> H NMR (600 MHz, DMSO-d <sub>6</sub> ) spectrum of [(Py2ald)Zn] <sub>2</sub> (BF <sub>4</sub> ) <sub>2</sub> ( <b>5<sup>Zn</sup></b> (BF <sub>4</sub> ) <sub>2</sub> ) obtained from the reaction of [(Py2ald)Zn(SePh)] ( <b>2<sup>Zn</sup></b> ) with PhC(O)Cl in MeCN.                                                                                                                                                    | S86         |
| <b>Figure S104.</b> <sup>1</sup> H NMR (400 MHz, DMSO-d <sub>6</sub> ) spectrum of [(Py2ald)Zn] <sub>2</sub> (BF <sub>4</sub> ) <sub>2</sub> ( <b>5<sup>Zn</sup></b> (BF <sub>4</sub> ) <sub>2</sub> ) obtained from the reaction of [(Py2ald)Zn(SePh)] ( <b>2<sup>Zn</sup></b> ) with CH <sub>2</sub> Br <sub>2</sub> in DMF.                                                                                                                              | S86         |
| <b>Figure S105.</b> Mass spectrometric data (in MeCN) for [(Py2ald)Zn] <sub>2</sub> (BF <sub>4</sub> ) <sub>2</sub> ( <b>5<sup>Zn</sup></b> (BF <sub>4</sub> ) <sub>2</sub> ) obtained from the reaction of [(Py2ald)Zn(SPh)] ( <b>1a<sup>Zn</sup></b> ) with MeI shows the presence of [(Py2ald)Zn] <sup>+</sup> (m/z: 410.0847, simulated data, orange line; 410.0825, observed data, green line).                                                        | S87         |
| <b>Figure S106.</b> Mass spectrometric data (in MeCN) for [(Py2ald)Zn] <sub>2</sub> (BF <sub>4</sub> ) <sub>2</sub> ( <b>5<sup>Zn</sup></b> (BF <sub>4</sub> ) <sub>2</sub> ) obtained from the reaction of [(Py2ald)Zn(SPh)] ( <b>1a<sup>Zn</sup></b> ) with PhCH <sub>2</sub> Br shows the presence of [(Py2ald)Zn] <sup>+</sup> (m/z: 410.0847, simulated data, orange line; 410.0829, observed data, green line).                                       | S87         |
| <b>Figure S107.</b> Mass spectrometric data (in MeCN) for [(Py2ald)Zn] <sub>2</sub> (BF <sub>4</sub> ) <sub>2</sub> ( <b>5<sup>Zn</sup></b> (BF <sub>4</sub> ) <sub>2</sub> ) obtained from the reaction of [(Py2ald)Zn(SPh)] ( <b>1a<sup>Zn</sup></b> ) with MeC(O)Cl, which shows the presence of [(Py2ald)Zn] <sup>+</sup> (m/z: 410.0847, simulated data, orange line; 410.0837, observed data, green line).                                            | S88         |
| <b>Figure S108.</b> Mass spectrometric data (in MeCN) for [(Py2ald)Zn] <sub>2</sub> (BF <sub>4</sub> ) <sub>2</sub> ( <b>5<sup>Zn</sup></b> (BF <sub>4</sub> ) <sub>2</sub> ) obtained from the reaction of [(Py2ald)Zn(SPh)] ( <b>1a<sup>Zn</sup></b> ) with PhC(O)Cl, shows the presence of [(Py2ald)Zn] <sup>+</sup> (m/z: 410.0847, simulated data, orange line; 410.0887, observed data, green line).                                                  | S88         |
| <b>Figure S109.</b> Mass spectrometric data (in MeCN) for [(Py2ald)Zn] <sub>2</sub> (BF <sub>4</sub> ) <sub>2</sub> ( <b>5<sup>Zn</sup></b> (BF <sub>4</sub> ) <sub>2</sub> ) obtained from the reaction of [(Py2ald)Zn(SPh)] ( <b>1a<sup>Zn</sup></b> ) with CH <sub>2</sub> Br <sub>2</sub> shows the presence of [(Py2ald)Zn] <sup>+</sup> (m/z: 410.0847, simulated data, orange line; 410.0858, observed data, green line).                            | S89         |
| <b>Figure S110.</b> Mass spectrometric data (in MeCN) for [(Py2ald)Zn] <sub>2</sub> (BF <sub>4</sub> ) <sub>2</sub> ( <b>5<sup>Zn</sup></b> (BF <sub>4</sub> ) <sub>2</sub> ) obtained from the reaction of [(Py2ald)Zn(SePh)] ( <b>2<sup>Zn</sup></b> ) with MeI shows the presence of [(Py2ald)Zn] <sup>+</sup> (m/z: 410.0847, simulated data, orange line; 410.0850, observed data, green line).                                                        | S89         |
| <b>Figure S111.</b> Mass spectrometric data (in MeCN) for [(Py2ald)Zn] <sub>2</sub> (BF <sub>4</sub> ) <sub>2</sub> ( <b>5<sup>Zn</sup></b> (BF <sub>4</sub> ) <sub>2</sub> ) obtained from the reaction of [(Py2ald)Zn(SePh)] ( <b>2<sup>Zn</sup></b> ) with PhCH <sub>2</sub> Br, which shows the presence of [(Py2ald)Zn] <sup>+</sup> (m/z: 410.0847, simulated data, orange line; 410.0846, observed data, green line).                                | S90         |
| <b>Figure S112.</b> Mass spectrometric data (in MeCN) for [(Py2ald)Zn] <sub>2</sub> (BF <sub>4</sub> ) <sub>2</sub> ( <b>5<sup>Zn</sup></b> (BF <sub>4</sub> ) <sub>2</sub> ) obtained from the reaction of [(Py2ald)Zn(SePh)] ( <b>2<sup>Zn</sup></b> ) with MeC(O)Cl shows the presence of [(Py2ald)Zn] <sup>+</sup> (m/z: 410.0847, simulated data, orange line; 410.0841, observed data, green line).                                                   | S90         |
| <b>Figure S113.</b> Mass spectrometric data (in MeCN) for [(Py2ald)Zn] <sub>2</sub> (BF <sub>4</sub> ) <sub>2</sub> ( <b>5<sup>Zn</sup></b> (BF <sub>4</sub> ) <sub>2</sub> ) obtained from the reaction of [(Py2ald)Zn(SePh)] ( <b>2<sup>Zn</sup></b> ) with PhC(O)Cl, which shows the presence of [(Py2ald)Zn] <sup>+</sup> (m/z: 410.0847, simulated data, orange line; 410.0839, observed data, green line).                                            | S91         |
| <b>Figure S114.</b> Mass spectrometric data (in MeCN) for [(Py2ald)Zn] <sub>2</sub> (BF <sub>4</sub> ) <sub>2</sub> ( <b>5<sup>Zn</sup></b> (BF <sub>4</sub> ) <sub>2</sub> ) obtained from the reaction of [(Py2ald)Zn(SePh)] ( <b>2<sup>Zn</sup></b> ) with CH <sub>2</sub> Br <sub>2</sub> shows the presence of [(Py2ald)Zn] <sup>+</sup> (m/z: 410.0847, simulated data, orange line; 410.0853, observed data, green line).                            | S91         |
| <b>Figure S115.</b> Mass spectrometric data (in MeCN) for [(Py2ald)Fe] <sub>2</sub> (BPh <sub>4</sub> ) <sub>2</sub> ( <b>5<sup>Fe</sup></b> (BPh <sub>4</sub> ) <sub>2</sub> ) obtained from the reaction of [(Py2ald)Fe(SPh)] ( <b>1a<sup>Fe</sup></b> ) with MeI ((in the presence of 2 equiv of NaBPh <sub>4</sub> ) shows the presence of [(Py2ald)Fe] <sup>+</sup> (m/z: 402.0905, simulated data, orange line; 402.0888, observed data, green line). | S92         |

| Contents                                                                                                                                                                                                                                                                                                                                                                                                                                                                                 | Page number |
|------------------------------------------------------------------------------------------------------------------------------------------------------------------------------------------------------------------------------------------------------------------------------------------------------------------------------------------------------------------------------------------------------------------------------------------------------------------------------------------|-------------|
| <b>Figure S116.</b> Mass spectrometric data (in MeCN) for [(Py2ald)Fe] <sub>2</sub> (BPh <sub>4</sub> ) <sub>2</sub> ( <b>5</b> <sup>Fe</sup> (BPh <sub>4</sub> ) <sub>2</sub> ) obtained from the reaction of [(Py2ald)Fe(SPh)] ( <b>1a</b> <sup>Fe</sup> ) with PhCH <sub>2</sub> Br (in the presence of 2 equiv of NaBPh <sub>4</sub> ) shows the presence of [(Py2ald)Fe] <sup>+</sup> (m/z: 402.0905, simulated data, green line; 402.0919, observed data, orange line).            | S92         |
| <b>Figure S117.</b> Mass spectrometric data (in MeCN) for [(Py2ald)Fe] <sub>2</sub> (BPh <sub>4</sub> ) <sub>2</sub> ( <b>5</b> <sup>Fe</sup> (BPh <sub>4</sub> ) <sub>2</sub> ) obtained from the reaction of [(Py2ald)Fe(SPh)] ( <b>1a</b> <sup>Fe</sup> ) with MeC(O)Cl (in the presence of 2 equiv of NaBPh <sub>4</sub> ) shows the presence of [(Py2ald)Fe] <sup>+</sup> (m/z: 402.0905, simulated data, orange line; 402.0880, observed data, green line).                        | S93         |
| <b>Figure S118.</b> Mass spectrometric data (in MeCN) for [(Py2ald)Fe] <sub>2</sub> (BPh <sub>4</sub> ) <sub>2</sub> ( <b>5</b> <sup>Fe</sup> (BPh <sub>4</sub> ) <sub>2</sub> ) obtained from the reaction of [(Py2ald)Fe(SPh)] ( <b>1a</b> <sup>Fe</sup> ) with PhC(O)Cl (in the presence of 2 equiv of NaBPh <sub>4</sub> ) shows the presence of [(Py2ald)Fe] <sup>+</sup> (m/z: 402.0905, simulated data, orange line; 402.0896, observed data, green line).                        | S93         |
| <b>Figure S119.</b> Mass spectrometric data (in MeCN) for [(Py2ald)Fe] <sub>2</sub> (BPh <sub>4</sub> ) <sub>2</sub> ( <b>5</b> <sup>Fe</sup> (BPh <sub>4</sub> ) <sub>2</sub> ) obtained from the reaction of [(Py2ald)Fe(SPh)] ( <b>1a</b> <sup>Fe</sup> ) with CH <sub>2</sub> Br <sub>2</sub> (in the presence of 2 equiv of NaBPh <sub>4</sub> ) shows the presence of [(Py2ald)Fe] <sup>+</sup> (m/z: 402.0905, simulated data, orange line; 402.0945, observed data, green line). | S94         |
| <b>Figure S120.</b> Mass spectrometric data (in MeCN) for [(Py2ald)Fe] <sub>2</sub> (BPh <sub>4</sub> ) <sub>2</sub> ( <b>5</b> <sup>Fe</sup> (BPh <sub>4</sub> ) <sub>2</sub> ) obtained from the reaction of [(Py2ald)Fe(SePh)] ( <b>2</b> <sup>Fe</sup> ) with MeI (in the presence of 2 equiv of NaBPh <sub>4</sub> ) shows the presence of [(Py2ald)Fe] <sup>+</sup> (m/z: 402.0905, simulated data, orange line; 402.0928, observed data, purple line).                            | S94         |
| <b>Figure S121.</b> Mass spectrometric data (in MeCN) for [(Py2ald)Fe] <sub>2</sub> (BPh <sub>4</sub> ) <sub>2</sub> ( <b>5</b> <sup>Fe</sup> (BPh <sub>4</sub> ) <sub>2</sub> ) obtained from the reaction of [(Py2ald)Fe(SePh)] ( <b>2</b> <sup>Fe</sup> ) with PhCH <sub>2</sub> Br (in the presence of 2 equiv of NaBPh <sub>4</sub> ) shows the presence of [(Py2ald)Fe] <sup>+</sup> (m/z: 402.0905, simulated data, orange line; 402.0932, observed data, green line).            | S95         |
| <b>Figure S122.</b> Mass spectrometric data (in MeCN) for [(Py2ald)Fe] <sub>2</sub> (BPh <sub>4</sub> ) <sub>2</sub> ( <b>5</b> <sup>Fe</sup> (BPh <sub>4</sub> ) <sub>2</sub> ) obtained from the reaction of [(Py2ald)Fe(SePh)] ( <b>2</b> <sup>Fe</sup> ) with MeC(O)Cl (in the presence of 2 equiv of NaBPh <sub>4</sub> ) shows the presence of [(Py2ald)Fe] <sup>+</sup> (m/z: 402.0916, simulated data, orange line; 402.0901, observed data, green line).                        | S95         |
| <b>Figure S123.</b> Mass spectrometric data (in MeCN) for [(Py2ald)Fe] <sub>2</sub> (BPh <sub>4</sub> ) <sub>2</sub> ( <b>5</b> <sup>Fe</sup> (BPh <sub>4</sub> ) <sub>2</sub> ) obtained from the reaction of [(Py2ald)Fe(SePh)] ( <b>2</b> <sup>Fe</sup> ) with PhC(O)Cl (in the presence of 2 equiv of NaBPh <sub>4</sub> ) shows the presence of [(Py2ald)Fe] <sup>+</sup> (m/z: 402.0905, simulated data, orange line; 402.0920, observed data, green line).                        | S96         |
| <b>Figure S124.</b> Mass spectrometric data (in MeCN) for [(Py2ald)Fe] <sub>2</sub> (BPh <sub>4</sub> ) <sub>2</sub> ( <b>5</b> <sup>Fe</sup> (BPh <sub>4</sub> ) <sub>2</sub> ) obtained from the reaction of [(Py2ald)Fe(SePh)] ( <b>2</b> <sup>Fe</sup> ) with CH <sub>2</sub> Br <sub>2</sub> (in the presence of 2 equiv of NaBPh <sub>4</sub> ) shows the presence of [(Py2ald)Fe] <sup>+</sup> (m/z: 402.0905, simulated data, orange line; 402.0916, observed data, green line). | S96         |
| <b>Figure S125.</b> GC-MS data for the identification and yield calculation of 1-methyl-2-phenyldisulfide (Me-S-S-Ph, yield = 46%) produced in the reaction of [(Py2ald)Zn(SPh)] ( <b>1a</b> <sup>Zn</sup> ) with S <sub>8</sub> and MeI.                                                                                                                                                                                                                                                | S97         |
| <b>Figure S126.</b> Gas chromatographic data for the identification and yield calculation of 1-benzyl-2-phenyldisulfide (PhCH <sub>2</sub> -S-S-Ph, yield = 58%) produced in the reaction of [(Py2ald)Zn(SPh)] ( <b>1a</b> <sup>Zn</sup> ) with S <sub>8</sub> and PhCH <sub>2</sub> Br in 1:1 ratio.                                                                                                                                                                                    | S98         |
| <b>Figure S127.</b> GC-MS data for the identification and yield calculation of 1-(2,6-dimethylphenyl)-2-methyldisulfide (Me-S-S-2,6-Me <sub>2</sub> -C <sub>6</sub> H <sub>4</sub> , yield = 46%) produced in the reaction of [(Py2ald)Zn(SC <sub>6</sub> H <sub>4</sub> -2,6-Me <sub>2</sub> )] ( <b>1b</b> <sup>Zn</sup> ) with S <sub>8</sub> and MeI.                                                                                                                                | S99         |
| <b>Figure S128.</b> GC-MS data for the identification and yield calculation of 1-benzyl-(2,6-dimethylphenyl)-2-methyldisulfide (PhCH <sub>2</sub> -S-S-2,6-Me <sub>2</sub> -C <sub>6</sub> H <sub>4</sub> , yield = 38%) produced in the reaction of [(Py2ald)Zn(SC <sub>6</sub> H <sub>4</sub> -2,6-Me <sub>2</sub> )] ( <b>1b</b> <sup>Zn</sup> ) with S <sub>8</sub> and PhCH <sub>2</sub> Br.                                                                                        | S100        |
| <b>Figure S129.</b> GC-MS data for the identification and yield calculation of methyl(phenylselanyl)sulfide (Me-S-Se-Ph, yield = 11%) produced in the reaction of [(Py2ald)Zn(SePh)] ( <b>2</b> <sup>Zn</sup> ) with S <sub>8</sub> and MeI.                                                                                                                                                                                                                                             | S101        |
| <b>Figure S130.</b> GC-MS data for the identification and yield calculation of ethyl(phenylselanyl)sulfide (Et-S-Se-Ph, yield = 13%) produced in the reaction of [(Py2ald)Zn(SePh)] ( <b>2</b> <sup>Zn</sup> ) with S <sub>8</sub> and EtBr.                                                                                                                                                                                                                                             | S102        |
| <b>Figure S131.</b> GC-MS data for the identification and yield calculation of 1-methyl-2-phenyldisulfide (Me-S-S-Ph, yield = 58%) produced in the reaction of [(Py2ald)Fe(SPh)] ( <b>1a</b> <sup>Fe</sup> ) with S <sub>8</sub> and MeI.                                                                                                                                                                                                                                                | S103        |

| Contents                                                                                                                                                                                                                                                                                                                                                                                                                                                                                    | Page number |
|---------------------------------------------------------------------------------------------------------------------------------------------------------------------------------------------------------------------------------------------------------------------------------------------------------------------------------------------------------------------------------------------------------------------------------------------------------------------------------------------|-------------|
| <b>Figure S132.</b> GC-MS data for the identification and yield calculation of 1-benzyl-2-phenyldisulfide (PhCH <sub>2</sub> -S-S-Ph, yield = 61%) produced in the reaction of [(Py2ald)Fe(SPh)] ( <b>1a<sup>Fe</sup></b> ) with S <sub>8</sub> and PhCH <sub>2</sub> Br.                                                                                                                                                                                                                   | S103        |
| <b>Figure S133.</b> GC-MS data for the identification and yield calculation of 1-(2,6-dimethylphenyl)-2-methyldisulfide (Me-S-S-2,6-Me <sub>2</sub> -C <sub>6</sub> H <sub>4</sub> , yield = 62%) produced in the reaction of [(Py2ald)Fe(SC <sub>6</sub> H <sub>4</sub> -2,6-Me <sub>2</sub> )] ( <b>1b<sup>Fe</sup></b> ) with S <sub>8</sub> and MeI.                                                                                                                                    | S104        |
| <b>Figure S134.</b> GC-MS data for the identification and yield calculation of 1-benzyl-(2,6-dimethylphenyl)-2-methyldisulfide (PhCH <sub>2</sub> -S-S-2,6-Me <sub>2</sub> -C <sub>6</sub> H <sub>4</sub> , yield = 71%) produced in the reaction of [(Py2ald)Fe(SC <sub>6</sub> H <sub>4</sub> -2,6-Me <sub>2</sub> )] ( <b>1b<sup>Fe</sup></b> ) with S <sub>8</sub> and PhCH <sub>2</sub> Br.                                                                                            | S105        |
| <b>Figure S135.</b> GC-MS data for the identification and yield calculation of methyl(phenylselanyl)sulfide (Me-S-Se-Ph, yield = 14%) produced in the reaction of [(Py2ald)Fe(SePh)] ( <b>2<sup>Fe</sup></b> ) with S <sub>8</sub> and MeI.                                                                                                                                                                                                                                                 | S106        |
| <b>Figure S136.</b> Gas chromatographic data for the identification and yield calculation of ethyl(phenylselanyl)sulfide (Et-S-Se-Ph, yield = 15%) produced in the reaction of [(Py2ald)Fe(SePh)] ( <b>2<sup>Fe</sup></b> ) with S <sub>8</sub> and EtBr.                                                                                                                                                                                                                                   | S107        |
| <b>Figure S137.</b> <sup>1</sup> H NMR (600 MHz, DMSO-d <sub>6</sub> ) spectrum of [(Py2ald)Zn] <sub>2</sub> (BF <sub>4</sub> ) <sub>2</sub> ( <b>5<sup>Zn</sup></b> (BF <sub>4</sub> ) <sub>2</sub> ) obtained from the reaction of [(Py2ald)Zn(SPh)] ( <b>1a<sup>Zn</sup></b> ) with S <sub>8</sub> and MeI.                                                                                                                                                                              | S108        |
| <b>Figure S138.</b> <sup>1</sup> H NMR (600 MHz, DMSO-d <sub>6</sub> ) spectrum of [(Py2ald)Zn] <sub>2</sub> (BF <sub>4</sub> ) <sub>2</sub> ( <b>5<sup>Zn</sup></b> (BF <sub>4</sub> ) <sub>2</sub> ) obtained from the reaction of [(Py2ald)Zn(SPh)] ( <b>1a<sup>Zn</sup></b> ) with S <sub>8</sub> and PhCH <sub>2</sub> Br.                                                                                                                                                             | S108        |
| <b>Figure S139.</b> <sup>1</sup> H NMR (600 MHz, DMSO-d <sub>6</sub> ) spectrum of [(Py2ald)Zn] <sub>2</sub> (BF <sub>4</sub> ) <sub>2</sub> ( <b>5<sup>Zn</sup></b> (BF <sub>4</sub> ) <sub>2</sub> ) obtained from the reaction of [(Py2ald)Zn(SC <sub>6</sub> H <sub>4</sub> -2,6-Me <sub>2</sub> )] ( <b>1b<sup>Zn</sup></b> ) with S <sub>8</sub> and MeI.                                                                                                                             | S109        |
| <b>Figure S140.</b> <sup>1</sup> H NMR (400 MHz, DMSO-d <sub>6</sub> ) spectrum of [(Py2ald)Zn] <sub>2</sub> (BF <sub>4</sub> ) <sub>2</sub> ( <b>5<sup>Zn</sup></b> (BF <sub>4</sub> ) <sub>2</sub> ) obtained from the reaction of [(Py2ald)Zn(SC <sub>6</sub> H <sub>4</sub> -2,6-Me <sub>2</sub> )] ( <b>1b<sup>Zn</sup></b> ) with S <sub>8</sub> and PhCH <sub>2</sub> Br.                                                                                                            | S109        |
| <b>Figure S141.</b> <sup>1</sup> H NMR (600 MHz, DMSO-d <sub>6</sub> ) spectrum of [(Py2ald)Zn] <sub>2</sub> (BF <sub>4</sub> ) <sub>2</sub> ( <b>5<sup>Zn</sup></b> (BF <sub>4</sub> ) <sub>2</sub> ) obtained from the reaction of [(Py2ald)Zn(SePh)] ( <b>2<sup>Zn</sup></b> ) with S <sub>8</sub> and MeI.                                                                                                                                                                              | S110        |
| <b>Figure S142.</b> <sup>1</sup> H NMR (400 MHz, DMSO-d <sub>6</sub> ) spectrum of [(Py2ald)Zn] <sub>2</sub> (BF <sub>4</sub> ) <sub>2</sub> ( <b>5<sup>Zn</sup></b> (BF <sub>4</sub> ) <sub>2</sub> ) obtained from the reaction of [(Py2ald)Zn(SePh)] ( <b>2<sup>Zn</sup></b> ) with S <sub>8</sub> and EtBr.                                                                                                                                                                             | S110        |
| <b>Figure S143.</b> Mass spectrometric data (in MeCN) for [(Py2ald)Zn] <sub>2</sub> (BF <sub>4</sub> ) <sub>2</sub> ( <b>5<sup>Zn</sup></b> (BF <sub>4</sub> ) <sub>2</sub> ) obtained from the reaction of [(Py2ald)Zn(SPh)] ( <b>1a<sup>Zn</sup></b> ) with S <sub>8</sub> and MeI shows the presence of [(Py2ald)Zn] <sup>+</sup> (m/z: 410.0847, simulated data, orange line; 410.0815, observed data, green line).                                                                     | S111        |
| <b>Figure S144.</b> Mass spectrometric data (in MeCN) for [(Py2ald)Zn] <sub>2</sub> (BF <sub>4</sub> ) <sub>2</sub> ( <b>5<sup>Zn</sup></b> (BF <sub>4</sub> ) <sub>2</sub> ) obtained from the reaction of [(Py2ald)Zn(SPh)] ( <b>1a<sup>Zn</sup></b> ) with S <sub>8</sub> and PhCH <sub>2</sub> Br, which shows the presence of [(Py2ald)Zn] <sup>+</sup> (m/z: 410.0847, simulated data, orange line; 410.0849, observed data, green line).                                             | S111        |
| <b>Figure S145.</b> Mass spectrometric data (in MeCN) for [(Py2ald)Zn] <sub>2</sub> (BF <sub>4</sub> ) <sub>2</sub> ( <b>5<sup>Zn</sup></b> (BF <sub>4</sub> ) <sub>2</sub> ) obtained from the reaction of [(Py2ald)Zn(SC <sub>6</sub> H <sub>4</sub> -2,6-Me <sub>2</sub> )] ( <b>1b<sup>Zn</sup></b> ) with S <sub>8</sub> and MeI, which shows the presence of [(Py2ald)Zn] <sup>+</sup> (m/z: 410.0847, simulated data, orange line; 410.0819, observed data, green line).             | S112        |
| <b>Figure S146.</b> Mass spectrometric data (in MeCN) for [(Py2ald)Zn] <sub>2</sub> (BF <sub>4</sub> ) <sub>2</sub> ( <b>5<sup>Zn</sup></b> (BF <sub>4</sub> ) <sub>2</sub> ) obtained from the reaction of [(Py2ald)Zn(SC <sub>6</sub> H <sub>4</sub> -2,6-Me <sub>2</sub> )] ( <b>1b<sup>Zn</sup></b> ) with S <sub>8</sub> and PhCH <sub>2</sub> Br shows the presence of [(Py2ald)Zn] <sup>+</sup> (m/z: 410.0847, simulated data, orange line; 410.0831, observed data, green line).   | S112        |
| <b>Figure S147.</b> Mass spectrometric data (in MeCN) for [(Py2ald)Zn] <sub>2</sub> (BF <sub>4</sub> ) <sub>2</sub> ( <b>5<sup>Zn</sup></b> (BF <sub>4</sub> ) <sub>2</sub> ) obtained from the reaction of [(Py2ald)Zn(SePh)] ( <b>2<sup>Zn</sup></b> ) with S <sub>8</sub> and MeI shows the presence of [(Py2ald)Zn] <sup>+</sup> (m/z: 410.0847, simulated data, orange line; 410.0837, observed data, green line).                                                                     | S113        |
| <b>Figure S148.</b> Mass spectrometric data (in MeCN) for [(Py2ald)Zn] <sub>2</sub> (BF <sub>4</sub> ) <sub>2</sub> ( <b>5<sup>Zn</sup></b> (BF <sub>4</sub> ) <sub>2</sub> ) obtained from the reaction of [(Py2ald)Zn(SePh)] ( <b>2<sup>Zn</sup></b> ) with S <sub>8</sub> and EtBr shows the presence of [(Py2ald)Zn] <sup>+</sup> (m/z: 410.0847, simulated data, orange line; 410.0849, observed data, green line).                                                                    | S113        |
| <b>Figure S149.</b> Mass spectrometric data (in MeCN) for [(Py2ald)Fe] <sub>2</sub> (BPh <sub>4</sub> ) <sub>2</sub> ( <b>5<sup>Fe</sup></b> (BPh <sub>4</sub> ) <sub>2</sub> ) obtained from the reaction of [(Py2ald)Fe(SPh)] ( <b>1a<sup>Fe</sup></b> ) with S <sub>8</sub> and MeI, which shows the presence of [(Py2ald)Fe] <sup>+</sup> (m/z: 402.0905, simulated data, orange line; 402.0924, observed data, green line).                                                            | S114        |
| <b>Figure S150.</b> Mass spectrometric data (in MeCN) for [(Py2ald)Fe] <sub>2</sub> (BPh <sub>4</sub> ) <sub>2</sub> ( <b>5<sup>Fe</sup></b> (BPh <sub>4</sub> ) <sub>2</sub> ) obtained from the reaction of [(Py2ald)Fe(SPh)] ( <b>1a<sup>Fe</sup></b> ) with S <sub>8</sub> and PhCH <sub>2</sub> Br, which shows the presence of [(Py2ald)Fe] <sup>+</sup> (m/z: 402.0905, simulated data, orange line; 402.0923, observed data, green line).                                           | S114        |
| <b>Figure S151.</b> Mass spectrometric data (in MeCN) for [(Py2ald)Fe] <sub>2</sub> (BPh <sub>4</sub> ) <sub>2</sub> ( <b>5<sup>Fe</sup></b> (BPh <sub>4</sub> ) <sub>2</sub> ) obtained from the reaction of [(Py2ald)Fe(SC <sub>6</sub> H <sub>4</sub> -2,6-Me <sub>2</sub> )] ( <b>1b<sup>Fe</sup></b> ) with S <sub>8</sub> and MeI, which shows the presence of [(Py2ald)Fe] <sup>+</sup> (m/z: 402.0905, simulated data, orange line; 402.0908, observed data, green line).           | S115        |
| <b>Figure S152.</b> Mass spectrometric data (in MeCN) for [(Py2ald)Fe] <sub>2</sub> (BPh <sub>4</sub> ) <sub>2</sub> ( <b>5<sup>Fe</sup></b> (BPh <sub>4</sub> ) <sub>2</sub> ) obtained from the reaction of [(Py2ald)Fe(SC <sub>6</sub> H <sub>4</sub> -2,6-Me <sub>2</sub> )] ( <b>1b<sup>Fe</sup></b> ) with S <sub>8</sub> and PhCH <sub>2</sub> Br shows the presence of [(Py2ald)Fe] <sup>+</sup> (m/z: 402.0905, simulated data, orange line; 402.0888, observed data, green line). | S115        |



| Contents                                                                                                                                                                                                                                                                                                                                                                                                                                | Page number |
|-----------------------------------------------------------------------------------------------------------------------------------------------------------------------------------------------------------------------------------------------------------------------------------------------------------------------------------------------------------------------------------------------------------------------------------------|-------------|
| <b>Figure S153.</b> Mass spectrometric data (in MeCN) for $[(\text{Py}2\text{ald})\text{Fe}]_2(\text{BPh}_4)_2$ ( $5^{\text{Fe}}(\text{BPh}_4)_2$ ) obtained from the reaction of $[(\text{Py}2\text{ald})\text{Fe}(\text{SePh})]$ ( $2^{\text{Fe}}$ ) with $\text{S}_8$ and MeI, which shows the presence of $[(\text{Py}2\text{ald})\text{Fe}]^+$ (m/z: 402.0905, simulated data, orange line; 402.0929, observed data, green line).  | S116        |
| <b>Figure S154.</b> Mass spectrometric data (in MeCN) for $[(\text{Py}2\text{ald})\text{Fe}]_2(\text{BPh}_4)_2$ ( $5^{\text{Fe}}(\text{BPh}_4)_2$ ) obtained from the reaction of $[(\text{Py}2\text{ald})\text{Fe}(\text{SePh})]$ ( $2^{\text{Fe}}$ ) with $\text{S}_8$ and EtBr, which shows the presence of $[(\text{Py}2\text{ald})\text{Fe}]^+$ (m/z: 402.0905, simulated data, orange line; 402.0921, observed data, green line). | S116        |

## Experimental Procedures.

### Experimental Procedure for the Generation, identification, and quantification of NO.

**Reaction of [(Py2ald)Zn(ONO)] ( $3^{\text{Zn}}$ ) with 2 equiv of  $t\text{BuSH}$ .** To a solution of 18.1 mg (0.04 mmol) of  $3^{\text{Zn}}$  in 0.5 mL of  $\text{CH}_2\text{Cl}_2$  was added a solution of 7.2 mg (0.08 mmol) of  $t\text{BuSH}$  in 0.5 mL of  $\text{CH}_2\text{Cl}_2$  and the solution was allowed to stir overnight. The reaction mixture was then filtered through Celite. The filtrate was evaporated to dryness and the yellow solid residue thus obtained was washed twice with 2 mL of  $\text{Et}_2\text{O}$ . The solid product was then dried under vacuum, dissolved in a mixture of MeCN and MeOH and the resulting solution was filtered through Celite.  $\text{Et}_2\text{O}$  was allowed to diffuse into the filtrate at  $0^\circ\text{C}$  overnight to obtain the product as yellow, needle-shaped, crystals (12.5 mg, 68%). The identity of the product as the starting material ( $3^{\text{Zn}}$ ) was confirmed by unit cell determination of the single crystals and  $^1\text{H}$  NMR spectroscopy. **NO trapping.** The experiment was carried out in a vial-inside-vial setup, to quantitatively trap nitric oxide (NO) by reaction with the  $(\text{TPP})\text{Co}^{\text{II}}$  complex. A smaller vial containing  $3^{\text{Zn}}$  (9.2 mg, 0.02 mmol) dissolved in  $\text{CH}_2\text{Cl}_2$  (~0.2 mL) was placed inside a larger vial containing  $(\text{TPP})\text{Co}^{\text{II}}$  (13.4 mg, 0.02 mmol) in  $\text{CH}_2\text{Cl}_2$  (~2 mL). The outer vial was sealed with a rubber septum. A solution of  $t\text{BuSH}$  (3.6 mg, 0.04 mmol) in  $\text{CH}_2\text{Cl}_2$  (~0.2 mL) was injected into the inner vial and allowed it to stand at room temperature for overnight with occasional shaking. The solution of the outer vial was evaporated to dryness, and the solid thus obtained was analyzed using FTIR and  $^1\text{H}$  NMR spectroscopy. The yield of NO was found to be 11%, based on the relative integrals of the  $^1\text{H}$  NMR resonances of  $(\text{TPP})\text{Co}(\text{NO})$  and unreacted  $(\text{TPP})\text{Co}^{\text{II}}$ .

**Reaction of [(Py2ald)Zn(ONO)] ( $3^{\text{Zn}}$ ) with 2 equiv of  $\text{PhCH}_2\text{SH}$ .** To a solution of 18.1 mg (0.04 mmol) of ( $3^{\text{Zn}}$ ) in 0.5 mL of  $\text{CH}_2\text{Cl}_2$  was added a solution of 9.9 mg (0.08 mmol) of  $\text{PhCH}_2\text{SH}$  in 0.5 mL of  $\text{CH}_2\text{Cl}_2$  and the solution was allowed to stir overnight. Following this, 6.6 mg (0.06 mmol) of sodium tetrafluoroborate ( $\text{NaBF}_4$ ) was added into the reaction mixture and was further stirred for an additional 2 hours. The reaction mixture was then filtered through

Celite. Et<sub>2</sub>O was subsequently added to the filtrate until the complete precipitation of the metal complex took place. The solution was then again filtered through Celite. The filtrate was kept for GC-MS experiment. The solid residue was washed twice with 2 mL of Et<sub>2</sub>O and dried under vacuum. The solid was then dissolved in a mixture of CH<sub>2</sub>Cl<sub>2</sub> and MeOH and filtered through Celite. Et<sub>2</sub>O was allowed to diffuse into the filtrate at 0°C overnight to obtain the product as yellow, needle-shaped, crystals (8.4 mg, 42%). The identity of the product, [(Py2ald)M]<sub>2</sub>(BF<sub>4</sub>)<sub>2</sub> (**5**(BF<sub>4</sub>)<sub>2</sub>), was confirmed by a unit cell determination of the single crystals, mass spectrometry and <sup>1</sup>H NMR spectroscopy. **NO trapping:** The experiment was carried out in a vial-inside-vial setup as described in the preceding experiment for the reaction of **3**<sup>Zn</sup> with 2 equiv of <sup>t</sup>BuSH but by using **3**<sup>Zn</sup> (9.2 mg, 0.02 mmol) and PhCH<sub>2</sub>SH (5.0 mg, 0.04 mmol). Yield of NO = 41%. **Reaction of [(Py2ald)Zn(ONO)] (**3**<sup>Zn</sup>) with 1 equiv of PhSH.** A procedure similar to that described for **3**<sup>Zn</sup> with 2 equiv of PhCH<sub>2</sub>SH was followed but by using **3**<sup>Zn</sup> (18.1 mg, 0.04 mmol) and PhSH (4.4 mg, 0.04 mmol) to obtain [(Py2ald)Zn]<sub>2</sub>(BF<sub>4</sub>)<sub>2</sub> (**5**(BF<sub>4</sub>)<sub>2</sub>) as the product (11.6 mg, 58%). The identity of the product was confirmed by a unit cell determination of the single crystals, mass spectrometry and <sup>1</sup>H NMR spectroscopy. **NO trapping:** The experiment was carried out in a vial-inside-vial setup as described in the preceding experiment for the reaction of **3**<sup>Zn</sup> with 2 equiv of <sup>t</sup>BuSH but by using **3**<sup>Zn</sup> (9.2 mg, 0.02 mmol) and PhSH (2.2 mg, 0.02 mmol). Yield of NO = 71%.

**[(Py2ald)Zn(ONO)] (**3**<sup>Zn</sup>) with 2 equiv of PhSH.** A procedure similar to that described for **3**<sup>Zn</sup> with 2 equiv of PhCH<sub>2</sub>SH was followed but by using **3**<sup>Zn</sup> (18.1 mg, 0.04 mmol) and PhSH (8.8 mg, 0.08 mmol) to obtain [(Py2ald)Zn(SPh)] (**1a**<sup>Zn</sup>) as the product (15 mg, 72%). The identity of the product was confirmed by a unit cell determination of the single crystals, and <sup>1</sup>H NMR spectroscopy. **NO trapping:** The experiment was carried out in a vial-inside-vial setup as described in the preceding experiment for the reaction of **3**<sup>Zn</sup> with 2 equiv of <sup>t</sup>BuSH but by using **3**<sup>Zn</sup> (9.2 mg, 0.02 mmol) and PhSH (4.4 mg, 0.04 mmol). Yield of NO = 74%.

**[(Py2ald)Zn(ONO)] ( $3^{\text{Zn}}$ ) with 2 equiv of PhSeH.** A procedure similar to that described for  $3^{\text{Zn}}$  with 2 equiv of PhCH<sub>2</sub>SH was followed but by using using  $3^{\text{Zn}}$  (18.1 mg, 0.04 mmol) and PhSeH (12.6 mg, 0.08 mmol) to obtain [(Py2ald)Zn(SePh)] ( $2^{\text{Zn}}$ ) as the product (16.1 mg, 71%). The identity of the product was confirmed by a unit cell determination of the single crystals, and <sup>1</sup>H NMR spectroscopy. **NO trapping:** The experiment was carried out in a vial-inside-vial setup as described in the preceding experiment for the reaction of  $3^{\text{Zn}}$  with 2 equiv of <sup>t</sup>BuSH but by using  $3^{\text{Zn}}$  (9.2 mg, 0.02 mmol) and PhSeH (6.3 mg, 0.04 mmol). Yield of NO = 81%.

**Trapping of NO generated in the reaction of [(Py2ald)Fe]<sub>2</sub>(BF<sub>4</sub>)<sub>2</sub> ( $5^{\text{Fe}}$ (BF<sub>4</sub>)<sub>2</sub>) with 4 equiv of (Bu<sub>4</sub>N)(NO<sub>2</sub>).** The experiment was carried out in a vial-inside-vial setup, to quantitatively trap nitric oxide (NO) by reaction with the (TPP)Co<sup>II</sup> complex. A smaller vial containing  $5^{\text{Fe}}$ (BF<sub>4</sub>)<sub>2</sub> (20 mg, 0.02 mmol) dissolved in CH<sub>2</sub>Cl<sub>2</sub> (~0.3 mL) was placed inside a larger vial containing (TPP)Co<sup>II</sup> (26.8 mg, 0.04 mmol) in CH<sub>2</sub>Cl<sub>2</sub> (~4 mL). The outer vial was sealed with a rubber septum. A solution of (Bu<sub>4</sub>N)(NO<sub>2</sub>) (23 mg, 0.08 mmol) in CH<sub>2</sub>Cl<sub>2</sub> (~0.3 mL) was injected into The solution of the outer vial was evaporated to dryness, and the solid thus obtained was analyzed using FTIR and <sup>1</sup>H NMR spectroscopy. The yield of NO was found to be 1.80 equiv, based on the relative integrals of the <sup>1</sup>H NMR resonances of (TPP)Co(NO) and unreacted (TPP)Co<sup>II</sup>.

**Trapping of NO generated in the reaction of [(Py2ald)Fe(SPh)] ( $1^{\text{Fe}}$ ) with 3 equiv of (Bu<sub>4</sub>N)(NO<sub>2</sub>).** The experiment was carried out in a vial-inside-vial setup as described in the preceding experiment for the reaction of  $5$ (BF<sub>4</sub>)<sub>2</sub> with 4 equiv of (Bu<sub>4</sub>N)(NO<sub>2</sub>) was followed but by using  $1^{\text{Fe}}$  (10.3 mg, 0.02 mmol) and (Bu<sub>4</sub>N)(NO<sub>2</sub>) (17.3 mg, 0.06 mmol). Yield of NO = 1.56 equiv.

**Trapping of NO generated in the reaction of [(Py2ald)Fe(SePh)] ( $2^{\text{Fe}}$ ) with 3 equiv of (Bu<sub>4</sub>N)(NO<sub>2</sub>).** The experiment was carried out in a vial-inside-vial setup as described in the preceding experiment for the reaction of  $5$ (BF<sub>4</sub>)<sub>2</sub> with 4 equiv of (Bu<sub>4</sub>N)(NO<sub>2</sub>) was followed

but by using  $2^{\text{Fe}}$  (11.2 mg, 0.02 mmol) and  $(\text{Bu}_4\text{N})(\text{NO}_2)$  (17.3 mg, 0.06 mmol). Yield of NO = 1.65 equiv.

**Reaction of  $[\{(\text{Py}2\text{ald})(\text{ONO})\text{Fe}\}_2-\mu_2-\text{O}]$  ( $8^{\text{Fe}}$ ) with 4 equiv of PhSH.** To a solution of 36.5 mg (0.04 mmol) of  $8^{\text{Fe}}$  in 0.5 mL of DCM was added a solution of 17.6 mg (0.16 mmol) of PhSH in 0.5 mL of  $\text{CH}_2\text{Cl}_2$  and the solution was allowed to stir overnight. The reaction mixture was then filtered through Celite.  $\text{Et}_2\text{O}$  was subsequently added to the filtrate until the complete precipitation of the metal complex took place. The solution was then again filtered through Celite. The filtrate was kept for GC-MS experiment. The solid residue was washed twice with 2 mL of  $\text{Et}_2\text{O}$  and dried under vacuum. The solid product was dissolved in 1 mL MeOH followed by the addition of  $\text{NaBPh}_4$  (20.5 mg, 0.06 mmol). The solution was stirred for 30 min during which the precipitation of a brown solid was observed. The brown solid was separated from the reaction mixture, washed twice with MeOH followed by  $\text{Et}_2\text{O}$  and dried under vacuum. The solid was then dissolved in DMF and filtered through Celite.  $\text{Et}_2\text{O}$  was allowed to diffuse into the filtrate at  $0^\circ\text{C}$  overnight to obtain the product as brown, needle-shaped, crystals of  $[\{(\text{Py}2\text{ald})\text{Fe}\}_2](\text{BPh}_4)_2$  ( $5^{\text{Fe}}(\text{BPh}_4)_2$ ) (31.8 mg, 55%). The product was identified by unit cell determination of the single crystals and mass spectrometry. **NO trapping:** The experiment was carried out in a vial-inside-vial setup (mentioned earlier), to quantitatively trap nitric oxide (NO) with the  $(\text{TPP})\text{Co}^{\text{II}}$  complex. A smaller vial containing  $8^{\text{Fe}}$  (18.25 mg, 0.02 mmol) dissolved in  $\text{CH}_2\text{Cl}_2$  (~0.2 mL) was placed inside a larger vial containing  $(\text{TPP})\text{Co}^{\text{II}}$  (26.8 mg, 0.04 mmol) in  $\text{CH}_2\text{Cl}_2$  (~4 mL). The outer vial was sealed with a rubber septum. A solution of PhSH (8.8 mg, 0.08 mmol) in  $\text{CH}_2\text{Cl}_2$  (~0.2 mL) was injected into the inner vial and allowed it to stand at RT for overnight with occasional shaking. The solution of the outer vial was evaporated to dryness, and the solid thus obtained was analyzed using FTIR and  $^1\text{H}$  NMR spectroscopy. Yield of NO = 1.42 equiv.

**Reaction of  $[\{(\text{Py}2\text{ald})(\text{ONO})\text{Fe}\}_2-\mu_2-\text{O}]$  ( $8^{\text{Fe}}$ ) with 6 equiv of PhSH.** The procedure described above for the reaction of  $8^{\text{Fe}}$  with 4 equiv of PhSH was followed but by using  $8^{\text{Fe}}$

(36.5 mg, 0.04 mmol) and PhSH (26.4 mg, 0.24 mmol) while addition of NaBPh<sub>4</sub> was not required. The product, [(Py2ald)Fe(SPh)] (**1a<sup>Fe</sup>**) was obtained as orange, needle-shaped, crystals (23.7 mg, 58%) and was identified by unit cell determination of the single crystals. **NO trapping:** The procedure described above for the reaction of **8<sup>Fe</sup>** with 4 equiv of PhSH was followed but by using **8<sup>Fe</sup>** (18.25 mg, 0.02 mmol) and PhSH (13.2 mg, 0.12 mmol). Yield of NO = 1.70 equiv.

**Reaction of [(Py2ald)(ONO)Fe]<sub>2</sub>-μ<sub>2</sub>-O (**8<sup>Fe</sup>**) with 4 equiv of PhSeH.** The procedure described above for the reaction of **8<sup>Fe</sup>** with 4 equiv of PhSH was followed but by using **8<sup>Fe</sup>** (36.5 mg, 0.04 mmol), PhSeH (25.1 mg, 0.16 mmol) and NaBPh<sub>4</sub> (20.5 mg, 0.06 mmol). The product, [(Py2ald)Fe]<sub>2</sub>(BPh<sub>4</sub>)<sub>2</sub>(**5<sup>Fe</sup>**(BPh<sub>4</sub>)<sub>2</sub>) was obtained as brown, needle-shaped, crystals (32.8 mg, 57%) and was identified by unit cell determination of the single crystals and mass spectrometry. **NO trapping:** The procedure described above for the reaction of **8<sup>Fe</sup>** with 4 equiv of PhSH was followed but by using **8<sup>Fe</sup>** (18.25 mg, 0.02 mmol) and PhSeH (12.6 mg, 0.08 mmol). Yield of NO = 1.66 equiv.

**Reaction of [(Py2ald)(ONO)Fe]<sub>2</sub>-μ<sub>2</sub>-O (**8<sup>Fe</sup>**) with 6 equiv of PhSeH.** The procedure described above for the reaction of **8<sup>Fe</sup>** with 4 equiv of PhSH was followed but by using **8<sup>Fe</sup>** (36.5 mg, 0.04 mmol) and PhSeH (37.7 mg, 0.24 mmol) while addition of NaBPh<sub>4</sub> was not required. The product, [(Py2ald)Fe(SePh)] (**2<sup>Fe</sup>**) was obtained as orange, needle-shaped, crystals (28.1 mg, 63%) and was identified by unit cell determination of the single crystals. **NO trapping:** The procedure described above for the reaction of **8<sup>Fe</sup>** with 4 equiv of PhSH was followed but by using **8<sup>Fe</sup>** (18.25 mg, 0.02 mmol) and PhSeH ((18.8 mg, 0.12 mmol). Yield of NO = 1.76 equiv.

### **Experimental Procedure for Transfer Reactions.**

**Reaction of [(Py2ald)Zn(SPh)] (**1a<sup>Zn</sup>**) with MeI.** To a solution of 20.8 mg (0.04 mmol) of **1a<sup>Zn</sup>** in 0.5 mL of DMF was added a solution of 5.7 mg (0.04 mmol) of Iodomethane (MeI) in 0.5 mL of DMF and the solution was allowed to stir overnight. Following this, 6.6 mg (0.06

mmol) of sodium tetrafluoroborate ( $\text{NaBF}_4$ ) was added into the reaction mixture and further stirred for an additional 2 hours. The reaction mixture was then filtered through Celite.  $\text{Et}_2\text{O}$  was subsequently added to the filtrate until the complete precipitation of the metal complex occurred. The solution was then again filtered through Celite. The resulting solid residue was washed twice with 2 mL of  $\text{Et}_2\text{O}$  and the remaining solution was kept for GC-MS experiment. The solid product was then dried under vacuum, dissolved in a mixture of 0.5 mL MeOH and 0.5 mL EtOH and the resulting solution was filtered through Celite.  $\text{Et}_2\text{O}$  was allowed to diffuse into the filtrate at  $0^\circ\text{C}$  overnight to obtain the product as yellow, needle-shaped, crystals of  $[(\text{Py}2\text{ald})\text{Zn}]_2(\text{BF}_4)_2$  ( $5^{\text{Zn}}(\text{BF}_4)_2$ ) in 62% yield (12.4 mg). The compound,  $5^{\text{Zn}}(\text{BF}_4)_2$ , was identified by  $^1\text{H}$  NMR spectroscopy and mass spectrometry.

A similar procedure was followed for the following transfer reactions using the specified amount of the reactants. The compound,  $5^{\text{Zn}}(\text{BF}_4)_2$ , was identified by  $^1\text{H}$  NMR spectroscopy and mass spectrometry in each case.

**Reaction of  $[(\text{Py}2\text{ald})\text{Zn}(\text{SPh})]$  ( $1\text{a}^{\text{Zn}}$ ) with  $\text{PhCH}_2\text{Br}$ .** 20.8 mg (0.04 mmol) of  $1\text{a}^{\text{Zn}}$  and 6.8 mg (0.04 mmol) of  $\text{PhCH}_2\text{Br}$  in DMF. Yield of  $5^{\text{Zn}}(\text{BF}_4)_2 = 59\%$  (11.8 mg).

**Reaction of  $[(\text{Py}2\text{ald})\text{Zn}(\text{SPh})]$  ( $1\text{a}^{\text{Zn}}$ ) with  $\text{MeC}(\text{O})\text{Cl}$ .** 20.8 mg (0.04 mmol) of  $1\text{a}^{\text{Zn}}$  and 3.1 mg (0.04 mmol) of  $\text{MeC}(\text{O})\text{Cl}$  in DMF. Yield of  $5^{\text{Zn}}(\text{BF}_4)_2 = 58\%$  (11.6 mg).

**Reaction of  $[(\text{Py}2\text{ald})\text{Zn}(\text{SPh})]$  ( $1\text{a}^{\text{Zn}}$ ) with  $\text{PhC}(\text{O})\text{Cl}$ .** 20.8 mg (0.04 mmol) of  $1\text{a}^{\text{Zn}}$  and 5.6 mg (0.04 mmol) of  $\text{PhC}(\text{O})\text{Cl}$  in MeCN. Yield of  $5^{\text{Zn}}(\text{BF}_4)_2 = 67\%$  (13.4 mg).

**Reaction of  $[(\text{Py}2\text{ald})\text{Zn}(\text{SPh})]$  ( $1\text{a}^{\text{Zn}}$ ) with  $\text{CH}_2\text{Br}_2$ .** 20.8 mg (0.04 mmol) of  $1\text{a}^{\text{Zn}}$  and 3.5 mg (0.03 mmol) of  $\text{CH}_2\text{Br}_2$  in DMF. Yield of  $5^{\text{Zn}}(\text{BF}_4)_2 = 71\%$  (14.2 mg).

**Reaction of  $[(\text{Py}2\text{ald})\text{Zn}(\text{SePh})]$  ( $2^{\text{Zn}}$ ) with  $\text{MeI}$ .** 22.7 mg (0.04 mmol) of  $2^{\text{Zn}}$  and 5.7 mg (0.04 mmol) of  $\text{MeI}$  in DMF. Yield of  $5^{\text{Zn}}(\text{BF}_4)_2 = 38\%$  (7.6 mg).

**Reaction of  $[(\text{Py}2\text{ald})\text{Zn}(\text{SePh})]$  ( $2^{\text{Zn}}$ ) with  $\text{PhCH}_2\text{Br}$ .** 22.7 mg (0.04 mmol) of  $2^{\text{Zn}}$  and 6.8 mg (0.04 mmol) of  $\text{PhCH}_2\text{Br}$  in DMF. Yield of  $5^{\text{Zn}}(\text{BF}_4)_2 = 55\%$  (11 mg).

**Reaction of [(Py2ald)Zn(SePh)] ( $2^{\text{Zn}}$ ) with MeC(O)Cl.** 22.7 mg (0.04 mmol) of  $2^{\text{Zn}}$  and 3.1 mg (0.04 mmol) of MeC(O)Cl in DMF. Yield of  $5^{\text{Zn}}(\text{BF}_4)_2 = 40\%$  (8 mg).

**Reaction of [(Py2ald)Zn(SePh)] ( $2^{\text{Zn}}$ ) with PhC(O)Cl.** 22.7 mg (0.04 mmol) of  $2^{\text{Zn}}$  and 5.6 mg (0.04 mmol) of PhC(O)Cl in MeCN. Yield of  $5^{\text{Zn}}(\text{BF}_4)_2 = 52\%$  (10.4 mg).

**Reaction of [(Py2ald)Zn(SePh)] ( $2^{\text{Zn}}$ ) with  $\text{CH}_2\text{Br}_2$ .** 22.7 mg (0.04 mmol) of  $2^{\text{Zn}}$  and 3.5 mg (0.03 mmol) of  $\text{CH}_2\text{Br}_2$  in DMF. Yield of  $5^{\text{Zn}}(\text{BF}_4)_2 = 68\%$  (13.6 mg).

**Reaction of [(Py2ald)Fe(SPh)] ( $1^{\text{Fe}}$ ) with MeI.** To a solution of 20.5 mg (0.04 mmol) of  $1^{\text{Fe}}$  in 0.5 mL of DMF was added a solution of 5.7 mg (0.04 mmol) of Iodomethane (MeI) and the solution was allowed to stir overnight. The reaction mixture was then filtered through Celite.  $\text{Et}_2\text{O}$  was subsequently added to the filtrate until the complete precipitation of the metal complex occurred. The solution was then again filtered through Celite. The resulting solid residue was washed twice with 2 mL of  $\text{Et}_2\text{O}$  and the remaining solution was kept for GC-MS experiment. The solid product was then dried under vacuum and dissolved in 1 mL MeOH. Following this, 20.5 mg (0.06 mmol) of sodium tetraphenylborate ( $\text{NaBPh}_4$ ) was added into the solution and further stirred for an additional 30 min. During this period, immediate precipitation of a brown solid was observed. Then the brown solid is separated from the reaction mixture and washed twice with MeOH and  $\text{Et}_2\text{O}$  and dried under vacuum. The solid was then redissolved in DMF and filtered through Celite.  $\text{Et}_2\text{O}$  was allowed to diffuse into the filtrate at  $0^\circ\text{C}$  overnight to obtain the product as brown, needle-shaped, crystals of  $[(\text{Py2ald})\text{Fe}]_2(\text{BPh}_4)_2$  ( $5^{\text{Fe}}(\text{BPh}_4)_2$ ) in 63% yield (18.2 mg). The compound was identified by unit cell determination of the single crystals and mass spectrometry.

A similar procedure was followed for the following transfer reactions using the specified amount of the reactants. The compound,  $5^{\text{Fe}}(\text{BPh}_4)_2$ , was identified by unit cell determination of the single crystals and mass spectrometry in each case.

**Reaction of [(Py2ald)Fe(SPh)] ( $1^{\text{Fe}}$ ) with  $\text{PhCH}_2\text{Br}$ .** 20.5 mg (0.04 mmol) of  $1^{\text{Fe}}$  and 6.8 mg (0.04 mmol) of  $\text{PhCH}_2\text{Br}$  in DMF. Yield of  $5^{\text{Fe}}(\text{BPh}_4)_2 = 78\%$  (22.5 mg).



**Reaction of [(Py2ald)Fe(SPh)] (1a<sup>Fe</sup>) with MeC(O)Cl.** 20.5 mg (0.04 mmol) of 1a<sup>Fe</sup> and 3.1 mg (0.04 mmol) of MeC(O)Cl in DMF. Yield of (5<sup>Fe</sup>(BPh<sub>4</sub>)<sub>2</sub>) = 76% (22 mg).

**Reaction of [(Py2ald)Fe(SPh)] (1a<sup>Fe</sup>) with PhC(O)Cl.** 20.5 mg (0.04 mmol) of 1a<sup>Fe</sup> and 5.6 mg (0.04 mmol) of PhC(O)Cl in MeCN. Yield of (5<sup>Fe</sup>(BPh<sub>4</sub>)<sub>2</sub>) = 59% (17 mg).

**Reaction of [(Py2ald)Fe(SPh)] (1a<sup>Fe</sup>) with CH<sub>2</sub>Br<sub>2</sub>.** 20.5 mg (0.04 mmol) of 1a<sup>Fe</sup> and 3.5 mg (0.03 mmol) of CH<sub>2</sub>Br<sub>2</sub> in DMF. Yield (5<sup>Fe</sup>(BPh<sub>4</sub>)<sub>2</sub>) = 87% (25.1 mg).

**Reaction of [(Py2ald)Fe(SePh)] (2<sup>Fe</sup>) with MeI.** 22.3 mg (0.04 mmol) of 2<sup>Fe</sup> and 5.7 mg (0.04 mmol) of MeI in DMF. Yield (5<sup>Fe</sup>(BPh<sub>4</sub>)<sub>2</sub>) = 34% (9.8 mg).

**Reaction of [(Py2ald)Fe(SePh)] (2<sup>Fe</sup>) with PhCH<sub>2</sub>Br.** 22.3 mg (0.04 mmol) of 2<sup>Fe</sup> and 6.8 mg (0.04 mmol) of PhCH<sub>2</sub>Br in DMF. Yield (5<sup>Fe</sup>(BPh<sub>4</sub>)<sub>2</sub>) = 58% (16.7 mg).

**Reaction of [(Py2ald)Fe(SePh)] (2<sup>Fe</sup>) with MeC(O)Cl.** 22.3 mg (0.04 mmol) of 2<sup>Fe</sup> and 3.1 mg (0.04 mmol) of MeC(O)Cl in DMF. Yield (5<sup>Fe</sup>(BPh<sub>4</sub>)<sub>2</sub>) = 43% (12.4 mg).

**Reaction of [(Py2ald)Fe(SePh)] (2<sup>Fe</sup>) with PhC(O)Cl.** 22.3 mg (0.04 mmol) of 2<sup>Fe</sup> and 5.6 mg (0.04 mmol) of PhC(O)Cl in MeCN. Yield (5<sup>Fe</sup>(BPh<sub>4</sub>)<sub>2</sub>) = 55% (15.9 mg).

**Reaction of [(Py2ald)Fe(SePh)] (2<sup>Fe</sup>) with CH<sub>2</sub>Br<sub>2</sub>.** 22.3 mg (0.04 mmol) of 2<sup>Fe</sup> and 3.5 mg (0.03 mmol) of CH<sub>2</sub>Br<sub>2</sub> in DMF. Yield (5<sup>Fe</sup>(BPh<sub>4</sub>)<sub>2</sub>) = 83% (24 mg).

#### **Experimental Procedure for the Transfer of Reactive Sulfur/Selenium Species.**

**Reaction of [(Py2ald)Zn(SPh)] (1a<sup>Zn</sup>) with S<sub>8</sub> and MeI.** To a solution of 20.8 mg (0.04 mmol) of 1a<sup>Zn</sup> in 1 mL of DMF was added 5.1 mg (0.02 mmol) of S<sub>8</sub> and the solution was allowed to stir for 4h. After that 5.7 mg (0.04 mmol) of Iodomethane (MeI) was added to the reaction mixture and the solution was allowed to stir overnight. Following this, 6.6 mg (0.06 mmol) of sodium tetrafluoroborate (NaBF<sub>4</sub>) was added into the reaction mixture and further stirred for an additional 2 hours. The reaction mixture was then filtered through Celite. Et<sub>2</sub>O was subsequently added to the filtrate until the complete precipitation of the metal complex occurred. The solution was then again filtered through Celite. The resulting solid residue was washed twice with 2 mL of Et<sub>2</sub>O and the remaining solution was kept for GC-MS experiment.

The solid product was then dried under vacuum, dissolved in a mixture of 0.5 mL MeOH and 0.5 mL EtOH and the resulting solution was filtered through Celite. Et<sub>2</sub>O was allowed to diffuse into the filtrate at 0°C overnight to obtain the product as yellow, needle-shaped, crystals of [(Py2ald)Zn]<sub>2</sub>(BF<sub>4</sub>)<sub>2</sub> (**5**<sup>Zn</sup>(BF<sub>4</sub>)<sub>2</sub>) in 53% yield (10.6 mg). The compound, **5**<sup>Zn</sup>(BF<sub>4</sub>)<sub>2</sub>, was identified by <sup>1</sup>H NMR spectroscopy and mass spectrometry.

A similar procedure was followed for the following reactions using the specified amount of the reactants. The compound, **5**<sup>Zn</sup>(BF<sub>4</sub>)<sub>2</sub>, was identified by <sup>1</sup>H NMR spectroscopy and mass spectrometry in each case.

**Reaction of [(Py2ald)Zn(SPh)] (1a<sup>Zn</sup>) with S<sub>8</sub> and PhCH<sub>2</sub>Br.** 20.8 mg (0.04 mmol) of **1a**<sup>Zn</sup>, 5.1 mg (0.02 mmol) of S<sub>8</sub> and 6.8 mg (0.04 mmol) of PhCH<sub>2</sub>Br in DMF. Yield of **5**<sup>Zn</sup>(BF<sub>4</sub>)<sub>2</sub> = 51% (10.2 mg).

**Reaction of [(Py2ald)Zn(SC<sub>6</sub>H<sub>4</sub>-2,6-Me<sub>2</sub>)] (1b<sup>Zn</sup>) with S<sub>8</sub> and MeI.** 21.92 mg (0.04 mmol) of **1b**<sup>Zn</sup>, 5.1 mg (0.02 mmol) of S<sub>8</sub> and 5.7 mg (0.04 mmol) of MeI in DMF. Yield of **5**<sup>Zn</sup>(BF<sub>4</sub>)<sub>2</sub> = 55% (11 mg).

**Reaction of [(Py2ald)Zn(SC<sub>6</sub>H<sub>4</sub>-2,6-Me<sub>2</sub>)] (1b<sup>Zn</sup>) with S<sub>8</sub> and PhCH<sub>2</sub>Br.** 21.92 mg (0.04 mmol) of **1b**<sup>Zn</sup>, 5.1 mg (0.02 mmol) of S<sub>8</sub> and 6.8 mg (0.04 mmol) of PhCH<sub>2</sub>Br in DMF. Yield of **5**<sup>Zn</sup>(BF<sub>4</sub>)<sub>2</sub> = 47% (9.4 mg).

**Reaction of [(Py2ald)Zn(SePh)] (2<sup>Zn</sup>) with S<sub>8</sub> and MeI.** 22.7 mg (0.04 mmol) of **2**<sup>Zn</sup>, 5.1 mg (0.02 mmol) of S<sub>8</sub> and 5.7 mg (0.04 mmol) of MeI in DMF. Yield of **5**<sup>Zn</sup>(BF<sub>4</sub>)<sub>2</sub> = 48% (9.6 mg).

**Reaction of [(Py2ald)Zn(SePh)] (2<sup>Zn</sup>) with S<sub>8</sub> and EtBr.** 22.7 mg (0.04 mmol) of **2**<sup>Zn</sup>, 5.1 mg (0.02 mmol) of S<sub>8</sub> and 4.35 mg (0.04 mmol) of EtBr in DMF. Yield of **5**<sup>Zn</sup>(BF<sub>4</sub>)<sub>2</sub> = 53% (10.6 mg).

**Reaction of [(Py2ald)Fe(SPh)] (1a<sup>Fe</sup>) with S<sub>8</sub> and MeI.** To a solution of 20.5 mg (0.04 mmol) of **1a**<sup>Fe</sup> in 1 mL of DMF was added 5.1 mg (0.02 mmol) of S<sub>8</sub> and the solution was allowed to stir for 4h. After that 5.7 mg (0.04 mmol) of Iodomethane (MeI) was added to the reaction

mixture and the solution was allowed to stir overnight. The reaction mixture was then filtered through Celite. Et<sub>2</sub>O was subsequently added to the filtrate until the complete precipitation of the metal complex occurred. The solution was then again filtered through Celite. The resulting solid residue was washed twice with 2 mL of Et<sub>2</sub>O and the remaining solution was kept for GC-MS experiment. The solid product was then dried under vacuum and dissolved in 1 mL MeOH. Following this, 20.5 mg (0.06 mmol) of sodium tetraphenylborate (NaBPh<sub>4</sub>) was added into the solution and further stirred for an additional 30 min. During this period, immediate precipitation of a brown solid was observed. Then the brown solid is separated from the reaction mixture and washed twice with MeOH and Et<sub>2</sub>O and dried under vacuum. The solid was then redissolved in DMF and filtered through Celite. Et<sub>2</sub>O was allowed to diffuse into the filtrate at 0°C overnight to obtain the product as brown, needle-shaped, crystals of [(Py2ald)Fe]<sub>2</sub>(BPh<sub>4</sub>)<sub>2</sub> (**5<sup>Fe</sup>**(BPh<sub>4</sub>)<sub>2</sub>) in 61% yield (17.6 mg).

A similar procedure was followed for the following reactions using the specified amount of the reactants. The compound, **5<sup>Fe</sup>**(BPh<sub>4</sub>)<sub>2</sub>, was identified by unit cell determination of the single crystals and mass spectrometry in each case.

**Reaction of [(Py2ald)Fe(SPh)] (**1a<sup>Fe</sup>**) with S<sub>8</sub> and PhCH<sub>2</sub>Br.** 20.5 mg (0.04 mmol) of **1a<sup>Fe</sup>**, 5.1 mg (0.02 mmol) of S<sub>8</sub> and 6.8 mg (0.04 mmol) of PhCH<sub>2</sub>Br in DMF. Yield of **5<sup>Fe</sup>**(BPh<sub>4</sub>)<sub>2</sub> = 62% (17.9 mg).

**Reaction of [(Py2ald)Fe(SC<sub>6</sub>H<sub>4</sub>-2,6-Me<sub>2</sub>)] (**1b<sup>Fe</sup>**) with S<sub>8</sub> and MeI.** 21.58 mg (0.04 mmol) of **1b<sup>Fe</sup>**, 5.1 mg (0.02 mmol) of S<sub>8</sub> and 5.7 mg (0.04 mmol) of MeI in DMF. Yield of **5<sup>Fe</sup>**(BPh<sub>4</sub>)<sub>2</sub> = 59% (17 mg).

**Reaction of [(Py2ald)Fe(SC<sub>6</sub>H<sub>4</sub>-2,6-Me<sub>2</sub>)] (**1b<sup>Fe</sup>**) with S<sub>8</sub> and PhCH<sub>2</sub>Br.** 21.58 mg (0.04 mmol) of **1b<sup>Fe</sup>**, 5.1 mg (0.02 mmol) of S<sub>8</sub> and 6.8 mg (0.04 mmol) of PhCH<sub>2</sub>Br in DMF. Yield of **5<sup>Fe</sup>**(BPh<sub>4</sub>)<sub>2</sub> = 61% (17.6 mg).

**Reaction of [(Py2ald)Fe(SePh)] (2<sup>Fe</sup>) with S<sub>8</sub> and MeI.** 22.3 mg (0.04 mmol) of 2<sup>Fe</sup>, 5.1 mg (0.02 mmol) of S<sub>8</sub> and 5.7 mg (0.04 mmol) of MeI in DMF. Yield of 5<sup>Fe</sup>(BPh<sub>4</sub>)<sub>2</sub> = 56% (16.2 mg).

**Reaction of [(Py2ald)Fe(SePh)] (2<sup>Fe</sup>) with S<sub>8</sub> and EtBr.** 22.3 mg (0.04 mmol) of 2<sup>Fe</sup>, 5.1 mg (0.02 mmol) of S<sub>8</sub> and 4.35 mg (0.04 mmol) of EtBr in DMF. Yield of 5<sup>Fe</sup>(BPh<sub>4</sub>)<sub>2</sub> = 49% (14.2 mg).

**Reaction of [{(Py2ald)Fe}<sub>2</sub>](BF<sub>4</sub>)<sub>2</sub> (5<sup>Fe</sup>(BF<sub>4</sub>)<sub>2</sub>) with 2 equiv of (Cp<sub>2</sub>Fe)(BF<sub>4</sub>) and (Bu<sub>4</sub>N)(NO<sub>2</sub>).** To a solution of 5<sup>Fe</sup>(BF<sub>4</sub>)<sub>2</sub> (20 mg, 0.02 mmol) in MeCN (~0.3 mL) was added a solution of (Cp<sub>2</sub>Fe)(BF<sub>4</sub>) (10.9 mg, 0.04 mmol) in MeCN (~4 mL) and the solution was allowed to stir overnight. Then a solution of (Bu<sub>4</sub>N)(NO<sub>2</sub>) (11.5 mg, 0.04 mmol) in MeCN (~0.3 mL) was added into the reaction mixture and allowed it to stir for 4 h. The reaction mixture was then evaporated to dryness and the brown solid residue thus obtained was washed twice with 2 mL of Et<sub>2</sub>O. The solid product was then dried under vacuum, dissolved in a mixture of CH<sub>2</sub>Cl<sub>2</sub> and EtOH and the resulting solution was filtered through Celite. Et<sub>2</sub>O was allowed to diffuse into the filtrate at 0°C overnight to obtain the product as brown, needle-shaped, crystals (13 mg, 62%). The compound was identified to be [{(Py2ald)(ONO)Fe}<sub>2</sub>-μ<sub>2</sub>-O] (8<sup>Fe</sup>) by unit cell determination of the single crystals.

**Reaction of [{(Py2ald)(ONO)Fe}<sub>2</sub>-μ<sub>2</sub>-O] (8<sup>Fe</sup>) with 4 equiv of Cp<sub>2</sub>Co.** To a solution of 36.5 mg (0.04 mmol) of 8<sup>Fe</sup> in 0.5 mL of CH<sub>2</sub>Cl<sub>2</sub> was added a solution of 30.3 mg (0.16 mmol) of Cp<sub>2</sub>Co in 0.5 mL of CH<sub>2</sub>Cl<sub>2</sub> and the solution was allowed to stir overnight. The reaction mixture was then evaporated to dryness and the brown-colored solid residue thus obtained was washed twice with 2 mL of Et<sub>2</sub>O. The solid product was then dried under vacuum and dissolved in 1 mL MeOH. Following this, 20.5 mg (0.06 mmol) of sodium tetraphenylborate (NaBPh<sub>4</sub>) was added into the solution and further stirred for an additional 30 min. During this period, immediate precipitation of a brown solid was observed. Then the brown solid was separated

from the reaction mixture and washed twice with MeOH and Et<sub>2</sub>O and dried under vacuum. The solid was then dissolved in DMF and filtered through Celite. Et<sub>2</sub>O was allowed to diffuse into the filtrate at 0°C overnight to obtain the product as brown, needle-shaped, crystals (44 mg, 76%). The compound was identified to be [ $\{(\text{Py}2\text{ald})\text{Fe}\}_2(\text{BPh}_4)_2$ ] (**5<sup>Fe</sup>(BPh<sub>4</sub>)<sub>2</sub>**) by unit cell determination of the single crystals.

**Reaction of [(Py2ald)Zn(SPh)] (**1a<sup>Zn</sup>**) with (Cp<sub>2</sub>Fe)(BF<sub>4</sub>).** To a solution of 20.8 mg (0.04 mmol) of **1a<sup>Zn</sup>** in 0.5 mL of CH<sub>2</sub>Cl<sub>2</sub> was added a solution of 10.91 mg (0.04 mmol) of (Cp<sub>2</sub>Fe)(BF<sub>4</sub>) in 0.5 mL of CH<sub>2</sub>Cl<sub>2</sub> and the reaction mixture was allowed to stir for 12 h. The reaction mixture was then filtered through Celite, the filtrate was evaporated to dryness and the solid residue thus obtained was washed twice with 2 mL of Et<sub>2</sub>O. The solid product was then dried under vacuum, dissolved in a mixture of 0.5 mL MeOH and 0.5 mL EtOH and the resulting solution was filtered through Celite. Et<sub>2</sub>O was allowed to diffuse into the filtrate at 0°C overnight to obtain the product, [(Py2ald)Zn]<sub>2</sub>(BF<sub>4</sub>)<sub>2</sub> (**5<sup>Zn</sup>(BF<sub>4</sub>)<sub>2</sub>**), as yellow, needle-shaped, crystals (13.2 mg, 66%). Identity of the compound was confirmed by unit cell determination of the single crystals, <sup>1</sup>H NMR spectroscopy and mass spectrometry.

**Reaction of [(Py2ald)Fe(SPh)] (**1a<sup>Fe</sup>**) with (Cp<sub>2</sub>Fe)(BF<sub>4</sub>).** To a solution of 20.5 mg (0.04 mmol) of **1a<sup>Fe</sup>** in 0.5 mL of CH<sub>2</sub>Cl<sub>2</sub> was added a solution of 10.91 mg (0.04 mmol) of (Cp<sub>2</sub>Fe)(BF<sub>4</sub>) in 0.5 mL of CH<sub>2</sub>Cl<sub>2</sub> and the reaction mixture was allowed to stir for 12 h. The reaction mixture was then filtered through Celite, the filtrate was evaporated to dryness and the solid residue thus obtained was washed twice with 2 mL of Et<sub>2</sub>O. The solid product was then dried under vacuum and dissolved in 1 mL MeOH. NaBPh<sub>4</sub> (20.5 mg, 0.06 mmol) was added into the solution and the solution was stirred for an additional 30 min. During this period, immediate precipitation of a brown solid was observed. Then the brown solid was separated from the reaction mixture, washed twice with MeOH and Et<sub>2</sub>O and dried under vacuum. The solid was then dissolved in DMF and filtered through Celite. Et<sub>2</sub>O was allowed to diffuse into

the filtrate at 0°C overnight to obtain the product,  $[\{(\text{Py}2\text{ald})\text{Fe}\}_2](\text{BPh}_4)_2$  ( $5^{\text{Fe}}(\text{BPh}_4)_2$ ), as brown, needle-shaped, crystals (20.5 mg, 71%). Identity of the compound was confirmed by unit cell determination of the single crystals and mass spectrometry.

**Reaction of  $[(\text{Py}2\text{ald})\text{Fe}(2,6\text{-Me}_2\text{-C}_6\text{H}_3\text{S})]$  ( $1\text{b}^{\text{Fe}}$ ) with  $(\text{Cp}_2\text{Fe})(\text{BF}_4)$ .** A procedure similar to that described above for the reaction of  $1\text{a}^{\text{Fe}}$  with  $(\text{Cp}_2\text{Fe})(\text{BF}_4)$  was followed but by using  $1\text{b}^{\text{Fe}}$  (21.58 mg, 0.04 mmol),  $(\text{Cp}_2\text{Fe})(\text{BF}_4)$  (10.91 mg, 0.04 mmol) and  $\text{NaBPh}_4$  (20.5 mg, 0.06 mmol). Identity of the product,  $[\{(\text{Py}2\text{ald})\text{Fe}\}_2](\text{BPh}_4)_2$  ( $5^{\text{Fe}}(\text{BPh}_4)_2$ ), (16.6 mg, 68%) was confirmed by unit cell determination of the single crystals and mass spectrometry.

**Reaction of  $[(\text{Py}2\text{ald})\text{Fe}(\text{SePh})]$  ( $2^{\text{Fe}}$ ) with  $(\text{Cp}_2\text{Fe})(\text{BF}_4)$ .** A procedure similar to that described above for the reaction of  $1\text{a}^{\text{Fe}}$  with  $(\text{Cp}_2\text{Fe})(\text{BF}_4)$  was followed but by using  $2^{\text{Fe}}$  (22.3 mg, 0.04 mmol),  $(\text{Cp}_2\text{Fe})(\text{BF}_4)$  (10.91 mg, 0.04 mmol) and  $\text{NaBPh}_4$  (20.5 mg, 0.06 mmol). Identity of the product,  $[\{(\text{Py}2\text{ald})\text{Fe}\}_2](\text{BPh}_4)_2$  ( $5^{\text{Fe}}(\text{BPh}_4)_2$ ), (21.6 mg, 75%) was confirmed by unit cell determination of the single crystals and mass spectrometry.

**Table S1.** Unit cell parameters for  $5^{Zn}(BF_4)_2$  obtained from different reactions.

| Reactions<br>(in the presence of NaBF <sub>4</sub> ) | Unit cell parameters |         |         |              |             |              |                    |
|------------------------------------------------------|----------------------|---------|---------|--------------|-------------|--------------|--------------------|
|                                                      | a (Å)                | b (Å)   | c (Å)   | $\alpha$ (°) | $\beta$ (°) | $\gamma$ (°) | V (Å) <sup>3</sup> |
| $1a^{Zn} + MeI$                                      | 9.63                 | 10.14   | 10.45   | 103.14°      | 90.22°      | 91.44°       | 993                |
| $1a^{Zn} + PhCH_2Br$                                 | 9.87                 | 10.10   | 10.51   | 105.21°      | 90.94°      | 91.21°       | 1011               |
| $1a^{Zn} + MeC(O)Cl$                                 | 9.84                 | 10.15   | 10.56   | 105.00°      | 90.92°      | 91.31°       | 1018               |
| $1a^{Zn} + PhC(O)Cl$                                 | 9.87                 | 10.12   | 10.50   | 105.66°      | 90.62°      | 91.45°       | 1010               |
| $1a^{Zn} + CH_2Br_2$                                 | 9.87                 | 10.10   | 10.51   | 105.21°      | 90.94°      | 91.21°       | 1011               |
| $2^{Zn} + MeI$                                       | 9.86                 | 10.31   | 10.43   | 104.23°      | 90.58°      | 91.50°       | 1027               |
| $2^{Zn} + PhCH_2Br$                                  | 9.85                 | 10.29   | 10.50   | 104.24°      | 90.64°      | 91.75°       | 1031               |
| $2^{Zn} + MeC(O)Cl$                                  | 9.86                 | 10.15   | 10.46   | 104.95°      | 90.99°      | 91.58°       | 1010               |
| $2^{Zn} + PhC(O)Cl$                                  | 9.86                 | 10.22   | 10.38   | 105.35°      | 90.77°      | 91.79°       | 1008               |
| $2^{Zn} + CH_2Br_2$                                  | 9.90                 | 10.29   | 10.45   | 104.75°      | 90.87°      | 91.77°       | 1029               |
| $1a^{Zn} + S_8 + MeI$                                | 10.06                | 10.13   | 10.48   | 104.23°      | 91.61°      | 92.49°       | 1027               |
| $1a^{Zn} + S_8 + PhCH_2Br$                           | 9.94                 | 10.09   | 10.44   | 105.01°      | 90.58°      | 91.54°       | 1011               |
| $1b^{Zn} + S_8 + MeI$                                | 9.89                 | 10.17   | 10.50   | 105.31°      | 90.57°      | 91.62°       | 1018               |
| $1b^{Zn} + S_8 + PhCH_2Br$                           | 9.93                 | 10.09   | 10.44   | 104.93°      | 90.66°      | 91.61°       | 1011               |
| $2^{Zn} + S_8 + MeI$                                 | 9.88                 | 10.09   | 10.49   | 105.62°      | 90.55°      | 91.79°       | 1006               |
| $2^{Zn} + S_8 + EtBr$                                | 9.91                 | 10.14   | 10.50   | 105.78°      | 91.07°      | 91.78°       | 1015               |
| $1a^{Zn} + (Cp_2Fe)(BF_4)$                           | 9.81                 | 10.34   | 10.37   | 105.41°      | 91.30°      | 90.46°       | 1014               |
| $3^{Zn} + 2$ equiv PhCH <sub>2</sub> SH              | 9.93                 | 10.19   | 10.49   | 104.85°      | 90.71°      | 91.29°       | 1026               |
| $3^{Zn} + 1$ equiv PhSH                              | 9.91                 | 10.11   | 10.50   | 105.27°      | 90.80°      | 91.96°       | 1013               |
| Authentic sample of<br>$5^{Zn}(BF_4)_2$              | 9.8506               | 10.1305 | 10.4984 | 105.549°     | 90.387°     | 91.566°      | 1008.8             |

**Table S2.** Unit cell parameters for **1a<sup>Zn</sup>** obtained from different reactions.

| Reactions                                  | Unit cell parameters |        |        |       |       |       |                    |
|--------------------------------------------|----------------------|--------|--------|-------|-------|-------|--------------------|
|                                            | a (Å)                | b (Å)  | c (Å)  | α (°) | β (°) | γ (°) | V (Å) <sup>3</sup> |
| <b>3<sup>Zn</sup></b> + 2 equiv PhSH       | 10.59                | 12.13  | 19.06  | 90°   | 90°   | 90°   | 2447               |
| <b>3<sup>Zn</sup></b> + 1 equiv NaSPh      | 10.44                | 12.05  | 18.60  | 90°   | 90°   | 90°   | 2339               |
| Authentic sample of <b>1a<sup>Zn</sup></b> | 19.047               | 12.115 | 10.586 | 90°   | 90°   | 90°   | 2442.7             |

**Table S3.** Unit cell parameters for **2<sup>Zn</sup>** obtained from different reactions.

| Reactions                                 | Unit cell parameters |         |         |       |       |       |                    |
|-------------------------------------------|----------------------|---------|---------|-------|-------|-------|--------------------|
|                                           | a (Å)                | b (Å)   | c (Å)   | α (°) | β (°) | γ (°) | V (Å) <sup>3</sup> |
| <b>3<sup>Zn</sup></b> + 2 equiv PhSeH     | 10.38                | 12.10   | 19.18   | 90°   | 90°   | 90°   | 2410               |
| Authentic sample of <b>2<sup>Zn</sup></b> | 19.1361              | 12.0931 | 10.4127 | 90°   | 90°   | 90°   | 2409.65            |

**Table S4.** Unit cell parameters for **3<sup>Zn</sup>** obtained from different reactions.

| Reactions                                         | Unit cell parameters |        |        |       |       |       |                    |
|---------------------------------------------------|----------------------|--------|--------|-------|-------|-------|--------------------|
|                                                   | a (Å)                | b (Å)  | c (Å)  | α (°) | β (°) | γ (°) | V (Å) <sup>3</sup> |
| <b>3<sup>Zn</sup></b> + 2 equiv <sup>t</sup> BuSH | 11.91                | 15.52  | 21.30  | 90°   | 90°   | 90°   | 3936               |
| Authentic sample of <b>3<sup>Zn</sup></b>         | 15.507               | 11.929 | 21.331 | 90°   | 90°   | 90°   | 3945.9             |



**Table S5.** Unit cell parameters for  $5^{\text{Fe}}(\text{BPh}_4)_2$  obtained from different reactions.

| Reaction<br>(in the presence of NaBPh <sub>4</sub> )            | Unit cell parameters |         |         |              |             |              |                    |
|-----------------------------------------------------------------|----------------------|---------|---------|--------------|-------------|--------------|--------------------|
|                                                                 | a (Å)                | b (Å)   | c (Å)   | $\alpha$ (°) | $\beta$ (°) | $\gamma$ (°) | V (Å) <sup>3</sup> |
| $1\mathbf{a}^{\text{Fe}} + \text{MeI}$                          | 11.29                | 12.60   | 14.94   | 103.51°      | 110.11°     | 104.92°      | 1803               |
| $1\mathbf{a}^{\text{Fe}} + \text{PhCH}_2\text{Br}$              | 11.27                | 12.60   | 14.92   | 103.29°      | 110.22°     | 105.02°      | 1796               |
| $1\mathbf{a}^{\text{Fe}} + \text{MeC(O)Cl}$                     | 11.26                | 12.59   | 14.89   | 103.27°      | 110.27°     | 105.08°      | 1789               |
| $1\mathbf{a}^{\text{Fe}} + \text{PhC(O)Cl}$                     | 11.26                | 12.60   | 14.91   | 103.26°      | 110.25°     | 105.05°      | 1794               |
| $1\mathbf{a}^{\text{Fe}} + \text{CH}_2\text{Br}_2$              | 11.27                | 12.61   | 14.92   | 103.17°      | 110.12°     | 105.07°      | 1798               |
| $2^{\text{Fe}} + \text{MeI}$                                    | 11.26                | 12.59   | 14.90   | 103.26°      | 110.27°     | 105.08°      | 1789               |
| $2^{\text{Fe}} + \text{PhCH}_2\text{Br}$                        | 11.30                | 12.63   | 14.96   | 103.40°      | 110.12°     | 104.97°      | 1812               |
| $2^{\text{Fe}} + \text{MeC(O)Cl}$                               | 11.26                | 12.61   | 14.90   | 103.23°      | 110.24°     | 105.10°      | 1794               |
| $2^{\text{Fe}} + \text{PhC(O)Cl}$                               | 11.26                | 12.59   | 14.89   | 103.33°      | 110.18°     | 105.04°      | 1792               |
| $2^{\text{Fe}} + \text{CH}_2\text{Br}_2$                        | 11.28                | 12.63   | 14.91   | 103.25°      | 110.21°     | 105.12°      | 1800               |
| $1\mathbf{a}^{\text{Fe}} + \text{S}_8 + \text{MeI}$             | 11.30                | 12.65   | 14.94   | 103.37°      | 110.06°     | 104.99°      | 1831               |
| $1\mathbf{a}^{\text{Fe}} + \text{S}_8 + \text{PhCH}_2\text{Br}$ | 11.29                | 12.62   | 14.94   | 103.34°      | 110.13°     | 105.00°      | 1807               |
| $1\mathbf{b}^{\text{Fe}} + \text{S}_8 + \text{MeI}$             | 11.28                | 12.62   | 14.90   | 103.17°      | 110.25°     | 105.19°      | 1798               |
| $1\mathbf{b}^{\text{Fe}} + \text{S}_8 + \text{PhCH}_2\text{Br}$ | 11.31                | 12.65   | 14.95   | 103.39°      | 110.06°     | 104.99°      | 1817               |
| $2^{\text{Fe}} + \text{S}_8 + \text{MeI}$                       | 11.26                | 12.60   | 14.90   | 103.26°      | 110.27°     | 105.06°      | 1791               |
| $2^{\text{Fe}} + \text{S}_8 + \text{EtBr}$                      | 11.28                | 12.61   | 14.93   | 103.26°      | 110.24°     | 105.03°      | 1801               |
| $1\mathbf{a}^{\text{Fe}} + (\text{Cp}_2\text{Fe})(\text{BF}_4)$ | 11.27                | 12.62   | 14.90   | 103.06°      | 110.31°     | 105.20°      | 1797               |
| $1\mathbf{b}^{\text{Fe}} + (\text{Cp}_2\text{Fe})(\text{BF}_4)$ | 11.28                | 12.63   | 14.89   | 103.05°      | 110.28°     | 105.22°      | 1798               |
| $2^{\text{Fe}} + (\text{Cp}_2\text{Fe})(\text{BF}_4)$           | 11.30                | 12.66   | 14.94   | 103.30°      | 110.13°     | 105.04°      | 1815               |
| $8^{\text{Fe}} + 4$ equiv PhSH                                  | 11.30                | 12.64   | 14.95   | 103.45°      | 110.10°     | 105.02°      | 1812               |
| $8^{\text{Fe}} + 4$ equiv PhSeH                                 | 11.27                | 12.62   | 14.90   | 103.06°      | 110.31°     | 105.20°      | 1797               |
| $8^{\text{Fe}} + 4$ equiv Cp <sub>2</sub> Co                    | 11.27                | 12.61   | 14.92   | 103.15°      | 110.27°     | 105.10°      | 1800               |
| Authentic sample of $5^{\text{Fe}}(\text{BPh}_4)_2$             | 11.1974              | 12.5730 | 14.8997 | 103.670°     | 110.022°    | 104.957°     | 1778.1             |

**Table S6.** Unit cell parameters for **8<sup>Fe</sup>** obtained from different reactions.

| Reactions                                                                                                                                               | Unit cell parameters |        |        |              |             |              |                    |
|---------------------------------------------------------------------------------------------------------------------------------------------------------|----------------------|--------|--------|--------------|-------------|--------------|--------------------|
|                                                                                                                                                         | a (Å)                | b (Å)  | c (Å)  | $\alpha$ (°) | $\beta$ (°) | $\gamma$ (°) | V (Å) <sup>3</sup> |
| <b>1a<sup>Fe</sup></b> + 3 equiv (Bu <sub>4</sub> N)(NO <sub>2</sub> )                                                                                  | 10.63                | 15.39  | 14.45  | 90°          | 98.79°      | 90°          | 2336               |
| <b>2<sup>Fe</sup></b> + 3 equiv (Bu <sub>4</sub> N)(NO <sub>2</sub> )                                                                                   | 10.60                | 15.74  | 14.65  | 90°          | 99.78°      | 90°          | 2409               |
| <b>5<sup>Fe</sup></b> (BPh <sub>4</sub> ) <sub>2</sub> + 2 equiv (Cp <sub>2</sub> Fe)(BF <sub>4</sub> ) + 2 equiv (Bu <sub>4</sub> N)(NO <sub>2</sub> ) | 10.81                | 15.56  | 14.51  | 90°          | 100.42°     | 90°          | 2400               |
| Authentic sample of <b>8<sup>Fe</sup></b>                                                                                                               | 10.613               | 15.673 | 14.617 | 90°          | 100.532°    | 90°          | 2390.5             |

**Table S7.** Unit cell parameters for **1a<sup>Fe</sup>** obtained from different reactions.

| Reactions                                  | Unit cell parameters |         |         |              |             |              |                    |
|--------------------------------------------|----------------------|---------|---------|--------------|-------------|--------------|--------------------|
|                                            | a (Å)                | b (Å)   | c (Å)   | $\alpha$ (°) | $\beta$ (°) | $\gamma$ (°) | V (Å) <sup>3</sup> |
| <b>8<sup>Fe</sup></b> + 6 equiv PhSH       | 10.44                | 12.04   | 19.04   | 90°          | 90°         | 90°          | 2393               |
| Authentic sample of <b>1a<sup>Fe</sup></b> | 19.0369              | 12.0159 | 10.4305 | 90°          | 90°         | 90°          | 2385.9             |

**Table S8.** Unit cell parameters for **2<sup>Fe</sup>** obtained from different reactions.

| Reactions                                 | Unit cell parameters |        |        |              |             |              |                    |
|-------------------------------------------|----------------------|--------|--------|--------------|-------------|--------------|--------------------|
|                                           | a (Å)                | b (Å)  | c (Å)  | $\alpha$ (°) | $\beta$ (°) | $\gamma$ (°) | V (Å) <sup>3</sup> |
| <b>8<sup>Fe</sup></b> + 6 equiv PhSeH     | 10.47                | 12.06  | 19.07  | 90°          | 90°         | 90°          | 2410               |
| Authentic sample of <b>2<sup>Fe</sup></b> | 19.172               | 12.076 | 10.439 | 90°          | 90°         | 90°          | 2416.7             |

**Table S9.** Yields (GC) of products obtained by the transfer of reactive sulfur / selenium species (generated insitu by selected Zn(II) and Fe(II) compounds and elemental sulfur/selenium).

| reactants                               | reactive sulfur / selenium species and by-products (yield)                                                                                    |                                                                                                                                                                                         |
|-----------------------------------------|-----------------------------------------------------------------------------------------------------------------------------------------------|-----------------------------------------------------------------------------------------------------------------------------------------------------------------------------------------|
|                                         | MeI                                                                                                                                           | PhCH <sub>2</sub> Br / EtBr (for <b>2<sup>Zn/Fe</sup></b> )                                                                                                                             |
| <b>1a<sup>Zn</sup></b> + S <sub>8</sub> | Me-S-S-Ph (46%)<br>Me-S-S-S-Me (3%)<br>Me-S-Ph (8%)<br>PhS-SPh (18%)                                                                          | PhCH <sub>2</sub> -S-S-Ph (58%)<br>PhCH <sub>2</sub> -S-S-S-CH <sub>2</sub> Ph (3%)<br>PhCH <sub>2</sub> -S-S-CH <sub>2</sub> Ph (8%)<br>PhCH <sub>2</sub> -S-Ph (5%),<br>PhS-SPh (18%) |
| <b>1b<sup>Zn</sup></b> + S <sub>8</sub> | Me-S-S-2,6-Me <sub>2</sub> -C <sub>6</sub> H <sub>4</sub> (46%)<br>(2,6-Me <sub>2</sub> -C <sub>6</sub> H <sub>4</sub> -S) <sub>2</sub> (15%) | PhCH <sub>2</sub> -S-S-2,6-Me <sub>2</sub> -C <sub>6</sub> H <sub>4</sub> (38%)<br>(2,6-Me <sub>2</sub> -C <sub>6</sub> H <sub>4</sub> -S) <sub>2</sub> (5%)                            |
| <b>1a<sup>Fe</sup></b> + S <sub>8</sub> | Me-S-S-Ph (58%)<br>PhS-SPh (18%)                                                                                                              | PhCH <sub>2</sub> -S-S-Ph (61%)<br>PhCH <sub>2</sub> -S-Ph (5%)<br>PhS-SPh (16%)                                                                                                        |
| <b>1b<sup>Fe</sup></b> + S <sub>8</sub> | Me-S-S-2,6-Me <sub>2</sub> -C <sub>6</sub> H <sub>4</sub> (62%)<br>(2,6-Me <sub>2</sub> -C <sub>6</sub> H <sub>4</sub> -S) <sub>2</sub> (15%) | PhCH <sub>2</sub> -S-S-2,6-Me <sub>2</sub> -C <sub>6</sub> H <sub>4</sub> (71%)<br>(2,6-Me <sub>2</sub> -C <sub>6</sub> H <sub>4</sub> -S) <sub>2</sub> (11%)                           |
| <b>2<sup>Zn</sup></b> + S <sub>8</sub>  | Me-S-Se-Ph (11%)<br>Ph-Se-Se-Ph (24%)<br>Me-S-S-S-S-Me (13%)                                                                                  | Et-S-Se-Ph (13%)<br>Et-S-S-S-Et (11%)<br>Et-Se-Ph (4%)<br>Ph-Se-Se-Ph (33%)                                                                                                             |
| <b>2<sup>Fe</sup></b> + S <sub>8</sub>  | Me-S-Se-Ph (14%)<br>Ph-Se-Se-Ph (30%)                                                                                                         | Et-S-Se-Ph (15%)<br>Et-S-S-S-Et (13%)<br>Ph-Se-Se-Ph (34%)                                                                                                                              |

**Table S10.** X-ray crystallographic data for compounds **1a<sup>Zn</sup>**, **1b<sup>Zn</sup>**, **2<sup>Zn</sup>**, **3<sup>Zn</sup>**, **4<sup>Zn</sup>**, **5<sup>Zn</sup>(BF<sub>4</sub>)<sub>2</sub>**, **6<sup>Zn</sup>** and **7<sup>Zn</sup>**.<sup>a</sup>

| Compounds                                                      | <b>1a<sup>Zn</sup></b>                                               | <b>1b<sup>Zn</sup></b>                                               | <b>2<sup>Zn</sup></b>                                                 | <b>3<sup>Zn</sup></b>                                               | <b>4<sup>Zn</sup></b>                                                               | <b>5<sup>Zn</sup>(BF<sub>4</sub>)<sub>2</sub></b>                                                              | <b>6<sup>Zn</sup></b>                                                 | <b>7<sup>Zn</sup></b>                                                              |
|----------------------------------------------------------------|----------------------------------------------------------------------|----------------------------------------------------------------------|-----------------------------------------------------------------------|---------------------------------------------------------------------|-------------------------------------------------------------------------------------|----------------------------------------------------------------------------------------------------------------|-----------------------------------------------------------------------|------------------------------------------------------------------------------------|
| CCDC deposition number                                         | 2191754                                                              | 2236890                                                              | 2208800                                                               | 2286781                                                             | 2265576                                                                             | 2226860                                                                                                        | 2265573                                                               | 2281940                                                                            |
| temp (K)                                                       | 273                                                                  | 147                                                                  | 145                                                                   | 150                                                                 | 149                                                                                 | 146                                                                                                            | 297                                                                   | 148                                                                                |
| formula                                                        | C <sub>27</sub> H <sub>25</sub> N <sub>3</sub> O <sub>2</sub><br>SZn | C <sub>29</sub> H <sub>29</sub> N <sub>3</sub> O <sub>2</sub><br>SZn | C <sub>27</sub> H <sub>25</sub> N <sub>3</sub> O <sub>2</sub><br>SeZn | C <sub>21</sub> H <sub>20</sub> N <sub>4</sub> O <sub>4</sub><br>Zn | C <sub>21</sub> H <sub>21</sub> Br <sub>2</sub> N <sub>3</sub><br>O <sub>2</sub> Zn | C <sub>42</sub> H <sub>40</sub> B <sub>2</sub><br>F <sub>8</sub> N <sub>6</sub> O <sub>4</sub> Zn <sub>2</sub> | C <sub>21</sub> H <sub>20</sub> BrN <sub>3</sub><br>O <sub>2</sub> Zn | C <sub>25</sub> H <sub>21</sub> N <sub>5</sub> O <sub>2</sub><br>S <sub>2</sub> Zn |
| formula weight                                                 | 520.93                                                               | 548.98                                                               | 567.83                                                                | 457.78                                                              | 572.60                                                                              | 997.16                                                                                                         | 491.68                                                                | 552.96                                                                             |
| Crystal system                                                 | orthorhombic                                                         | monoclinic                                                           | orthorhombic                                                          | orthorhombic                                                        | triclinic                                                                           | triclinic                                                                                                      | orthorhombic                                                          | monoclinic                                                                         |
| space group                                                    | Pca2 <sub>1</sub>                                                    | P2 <sub>1</sub> /n                                                   | Pca2 <sub>1</sub>                                                     | Pbca                                                                | P $\bar{1}$                                                                         | P $\bar{1}$                                                                                                    | Pbca                                                                  | P2 <sub>1</sub> /n                                                                 |
| a, Å                                                           | 19.047(6)                                                            | 11.2316(14)                                                          | 19.1361(8)                                                            | 15.507(4)                                                           | 7.734(2)                                                                            | 9.8506(14)                                                                                                     | 15.2257(12)                                                           | 9.4688(5)                                                                          |
| b, Å                                                           | 12.115(4)                                                            | 14.8312(18)                                                          | 12.0931(5)                                                            | 11.929(3)                                                           | 8.957(3)                                                                            | 10.1305(15)                                                                                                    | 12.0543(9)                                                            | 13.1273(8)                                                                         |
| c, Å                                                           | 10.586(4)                                                            | 15.672(2)                                                            | 10.4127(4)                                                            | 21.331(5)                                                           | 16.769(5)                                                                           | 10.4984(13)                                                                                                    | 21.5492(17)                                                           | 20.2985(11)                                                                        |
| $\alpha$ , deg                                                 | 90                                                                   | 90                                                                   | 90                                                                    | 90                                                                  | 96.920(10)                                                                          | 105.549(12)                                                                                                    | 90                                                                    | 90                                                                                 |
| $\beta$ , deg                                                  | 90                                                                   | 103.532(13)                                                          | 90                                                                    | 90                                                                  | 92.869(10)                                                                          | 90.387(11)                                                                                                     | 90                                                                    | 97.877(2)                                                                          |
| $\gamma$ , deg                                                 | 90                                                                   | 90                                                                   | 90                                                                    | 90                                                                  | 92.869(10)                                                                          | 91.566(12)                                                                                                     | 90                                                                    | 90                                                                                 |
| V, Å <sup>3</sup>                                              | 2442.7(14)                                                           | 2538.1(6)                                                            | 2409.65(17)                                                           | 3945.9(17)                                                          | 1062.3(5)                                                                           | 1008.8(2)                                                                                                      | 3955.0(5)                                                             | 2499.3(2)                                                                          |
| Z                                                              | 4                                                                    | 4                                                                    | 4                                                                     | 8                                                                   | 2                                                                                   | 1                                                                                                              | 8                                                                     | 4                                                                                  |
| $\rho_{\text{calcd}}$ , gm/cm <sup>3</sup>                     | 1.417                                                                | 1.437                                                                | 1.565                                                                 | 1.541                                                               | 1.790                                                                               | 1.641                                                                                                          | 1.651                                                                 | 1.470                                                                              |
| $\mu$ , mm <sup>-1</sup>                                       | 1.120                                                                | 1.082                                                                | 2.560                                                                 | 1.282                                                               | 4.940                                                                               | 1.279                                                                                                          | 3.284                                                                 | 1.182                                                                              |
| $\theta$ range, deg                                            | 1.992-<br>25.889                                                     | 1.916-<br>25.681                                                     | 2.715-<br>25.722                                                      | 2.318-<br>25.026                                                    | 2.600-<br>25.718                                                                    | 2.866-<br>25.026                                                                                               | 2.353-<br>25.703                                                      | 2.267-<br>25.703                                                                   |
| completeness to $\theta$ , %                                   | 1.000                                                                | 0.998                                                                | 0.998                                                                 | 0.998                                                               | 0.988                                                                               | 0.982                                                                                                          | 0.992                                                                 | 0.998                                                                              |
| reflections collected                                          | 38165                                                                | 23582                                                                | 26224                                                                 | 28645                                                               | 10448                                                                               | 8880                                                                                                           | 41854                                                                 | 26743                                                                              |
| independent reflections                                        | 4728                                                                 | 4813                                                                 | 4240                                                                  | 3477                                                                | 4001                                                                                | 3498                                                                                                           | 3740                                                                  | 4744                                                                               |
| R(int)                                                         | 0.0690                                                               | 0.1444                                                               | 0.0579                                                                | 0.1141                                                              | 0.0428                                                                              | 0.0865                                                                                                         | 0.0514                                                                | 0.0648                                                                             |
| Restraints <sup>b</sup>                                        | 1                                                                    | 0                                                                    | 1                                                                     | 5                                                                   | 0                                                                                   | 0                                                                                                              | 0                                                                     | 0                                                                                  |
| parameters                                                     | 309                                                                  | 328                                                                  | 309                                                                   | 270                                                                 | 257                                                                                 | 290                                                                                                            | 255                                                                   | 264                                                                                |
| Max., min. transmission                                        | 0.7453,<br>0.5752                                                    | 1.00000,<br>0.25991                                                  | 0.7453,<br>0.5300                                                     | 0.7452,<br>0.6011                                                   | 0.7453,<br>0.4585                                                                   | 1.00000,<br>0.61984                                                                                            | 0.7453,<br>0.5103                                                     | 0.7453,<br>0.6076                                                                  |
| R1 <sup>c</sup> (wR2) <sup>d</sup><br>[ $I > 2\sigma(I)$ ]     | 0.0309<br>(0.0567)                                                   | 0.0777<br>(0.1676)                                                   | 0.0289<br>(0.0550)                                                    | 0.0451<br>(0.1051)                                                  | 0.0399<br>(0.1045)                                                                  | 0.0757<br>(0.1615)                                                                                             | 0.0262<br>(0.0611)                                                    | 0.0805<br>(0.2142)                                                                 |
| R1 <sup>e</sup> (wR2) <sup>e</sup>                             | 0.0551<br>(0.0640)                                                   | 0.1338<br>(0.2056)                                                   | 0.0371<br>(0.0584)                                                    | 0.0735<br>(0.1249)                                                  | 0.0461<br>(0.1084)                                                                  | 0.1155<br>(0.1864)                                                                                             | 0.0366<br>(0.0656)                                                    | 0.1220<br>(0.2486)                                                                 |
| GOF(F2) <sup>e</sup>                                           | 1.009                                                                | 1.024                                                                | 1.048                                                                 | 1.037                                                               | 1.020                                                                               | 1.019                                                                                                          | 1.026                                                                 | 1.026                                                                              |
| <sup>f</sup> max, <sup>f</sup> min<br>peaks, e.Å <sup>-3</sup> | 0.295,<br>-0.229                                                     | 0.992,<br>-0.650                                                     | 0.334,<br>-0.264                                                      | 0.439,<br>-0.433                                                    | 2.162,<br>-0.638                                                                    | 0.887,<br>-1.094                                                                                               | 0.469,<br>-0.380                                                      | 1.667,<br>-2.072                                                                   |

<sup>a</sup>Mo K $\alpha$  radiation ( $\lambda = 0.71073$  Å). <sup>b</sup>**3<sup>Zn</sup>**, disordered nitrite. <sup>c</sup> $R1 = \sum ||Fo| - |Fc|| / \sum |Fo|$ . <sup>d</sup> $wR2 = \{\sum [w(Fo2 - Fc2)^2] / \sum [w(Fo2)^2]\}^{1/2}$ . <sup>e</sup> $GOF = \{\sum [w(Fo2 - Fc2)^2] / (n - p)\}^{1/2}$ , where n is the number of data and p is the number of refined parameters. <sup>f</sup>electron density near: **1a<sup>Zn</sup>**, phenyl ring of benzenethiolate; **1b<sup>Zn</sup>**, sulfur atom; **2<sup>Zn</sup>**, selenium atom; **3<sup>Zn</sup>**, one pyridyl ring of the ligand; **4<sup>Zn</sup>**, methyl group of the ligand; **5<sup>Zn</sup>(BF<sub>4</sub>)<sub>2</sub>**, zinc atom; **6<sup>Zn</sup>**, bromine atom; **7<sup>Zn</sup>**, phenyl ring of the ligand.

**Table S11.** X-ray crystallographic data for compounds **1a<sup>Fe</sup>**, **1b<sup>Fe</sup>**, **2<sup>Fe</sup>**, **5<sup>Fe</sup>(BPh<sub>4</sub>)<sub>2</sub>** and **8<sup>Fe</sup>**.<sup>a</sup>

| Compounds                                       | <b>1a<sup>Fe</sup></b>                                            | <b>1b<sup>Fe</sup></b>                                            | <b>2<sup>Fe</sup></b>                                              | <b>5<sup>Fe</sup>(BPh<sub>4</sub>)<sub>2</sub></b>                                           | <b>8<sup>Fe</sup></b>                                                         |
|-------------------------------------------------|-------------------------------------------------------------------|-------------------------------------------------------------------|--------------------------------------------------------------------|----------------------------------------------------------------------------------------------|-------------------------------------------------------------------------------|
| CCDC deposition number                          | 2227144                                                           | 2227145                                                           | 2233141                                                            | 2233689                                                                                      | 2288735                                                                       |
| temp (K)                                        | 155                                                               | 160                                                               | 148                                                                | 145                                                                                          | 125                                                                           |
| formula                                         | C <sub>27</sub> H <sub>25</sub> FeN <sub>3</sub> O <sub>2</sub> S | C <sub>29</sub> H <sub>29</sub> FeN <sub>3</sub> O <sub>2</sub> S | C <sub>27</sub> H <sub>25</sub> FeN <sub>3</sub> O <sub>2</sub> Se | C <sub>90</sub> H <sub>76</sub> B <sub>2</sub> Fe <sub>2</sub> N <sub>6</sub> O <sub>4</sub> | C <sub>42</sub> H <sub>40</sub> Fe <sub>2</sub> N <sub>8</sub> O <sub>9</sub> |
| formula weight                                  | 511.41                                                            | 539.46                                                            | 558.31                                                             | 1438.88                                                                                      | 912.52                                                                        |
| Crystal system                                  | orthorhombic                                                      | monoclinic                                                        | orthorhombic                                                       | triclinic                                                                                    | monoclinic                                                                    |
| space group                                     | Pca2 <sub>1</sub>                                                 | P2 <sub>1</sub> /n                                                | Pca2 <sub>1</sub>                                                  | P $\bar{1}$                                                                                  | P2 <sub>1</sub> /c                                                            |
| a, Å                                            | 19.0369(15)                                                       | 11.3033(5)                                                        | 19.172(5)                                                          | 11.1974(12)                                                                                  | 10.613(4)                                                                     |
| b, Å                                            | 12.0159(9)                                                        | 14.9444(6)                                                        | 12.076(3)                                                          | 12.5730(12)                                                                                  | 15.673(6)                                                                     |
| c, Å                                            | 10.4305(8)                                                        | 15.7897(7)                                                        | 10.439(3)                                                          | 14.8997(12)                                                                                  | 14.617(6)                                                                     |
| α, deg                                          | 90                                                                | 90                                                                | 90                                                                 | 103.670(3)                                                                                   | 90                                                                            |
| β, deg                                          | 90                                                                | 103.715(4)                                                        | 90                                                                 | 110.022(3)                                                                                   | 100.532(12)                                                                   |
| γ, deg                                          | 90                                                                | 90                                                                | 90                                                                 | 104.957(3)                                                                                   | 90                                                                            |
| V, Å <sup>3</sup>                               | 2385.9(3)                                                         | 2591.2(2)                                                         | 2416.7(11)                                                         | 1778.1(3)                                                                                    | 2390.5(16)                                                                    |
| Z                                               | 4                                                                 | 4                                                                 | 4                                                                  | 1                                                                                            | 2                                                                             |
| ρ <sub>calcd</sub> , gm/cm <sup>3</sup>         | 1.424                                                             | 1.383                                                             | 1.534                                                              | 1.344                                                                                        | 1.268                                                                         |
| μ, mm <sup>-1</sup>                             | 0.750                                                             | 0.694                                                             | 2.160                                                              | 0.468                                                                                        | 0.664                                                                         |
| θ range, deg                                    | 2.730-25.675                                                      | 1.902-25.681                                                      | 2.713-25.776                                                       | 2.767-25.070                                                                                 | 2.549-25.841                                                                  |
| completeness to θ, %                            | 0.997                                                             | 0.991                                                             | 0.998                                                              | 0.990                                                                                        | 0.988                                                                         |
| reflections collected                           | 22153                                                             | 24063                                                             | 23000                                                              | 16800                                                                                        | 22154                                                                         |
| independent reflections                         | 4519                                                              | 4868                                                              | 4643                                                               | 6248                                                                                         | 4562                                                                          |
| R(int)                                          | 0.0462                                                            | 0.0440                                                            | 0.0552                                                             | 0.0618                                                                                       | 0.0631                                                                        |
| Restraints <sup>b</sup>                         | 1                                                                 | 0                                                                 | 1                                                                  | 1                                                                                            | 4                                                                             |
| parameters                                      | 309                                                               | 328                                                               | 309                                                                | 468                                                                                          | 273                                                                           |
| Max., min. transmission                         | 1.00000, 0.69378                                                  | 1.00000, 0.75874                                                  | 0.7453, 0.6194                                                     | 0.7452, 0.6730                                                                               | 0.7453, 0.5331                                                                |
| R1 <sup>c</sup> (wR2) <sup>d</sup><br>[I>2σ(I)] | 0.0305<br>(0.0637)                                                | 0.0296<br>(0.0743)                                                | 0.0305<br>(0.0644)                                                 | 0.0659<br>(0.1421)                                                                           | 0.0545<br>(0.1467)                                                            |
| R1 <sup>c</sup> (wR2) <sup>e</sup>              | 0.0347<br>(0.0663)                                                | 0.0327<br>(0.0764)                                                | 0.0398<br>(0.0683)                                                 | 0.1019<br>(0.1637)                                                                           | 0.0727<br>(0.1604)                                                            |
| GOF(F2) <sup>e</sup>                            | 1.036                                                             | 1.027                                                             | 1.036                                                              | 1.035                                                                                        | 1.092                                                                         |
| f <sub>max</sub> , min peaks, e.Å <sup>-3</sup> | 0.181, -0.270                                                     | 0.363, -0.279                                                     | 0.232, -0.373                                                      | 1.401, -0.561                                                                                | 0.391, -0.617                                                                 |

<sup>a</sup>Mo Kα radiation (λ = 0.71073 Å). <sup>b</sup>**8<sup>Fe</sup>**, disordered nitrite and aldehyde group. <sup>c</sup>R1 = Σ||Fo| - |Fc||/Σ|Fo|. <sup>d</sup>wR2 = {Σ[w(Fo2-Fc2)2]/Σ[w(Fo2)2]}<sup>1/2</sup>. <sup>e</sup>GOF = {Σ[w(Fo2-Fc2)2]/(n-p)}<sup>1/2</sup>, where n is the number of data and p is the number of refined parameters. <sup>f</sup>electron density near: **1a<sup>Fe</sup>**, iron atom; **1b<sup>Fe</sup>**, phenyl ring of the ligand; **2<sup>Fe</sup>**, selenium; **5<sup>Fe</sup>(BPh<sub>4</sub>)<sub>2</sub>**, phenyl ring of the ligand; **8<sup>Fe</sup>**, disordered nitrite.

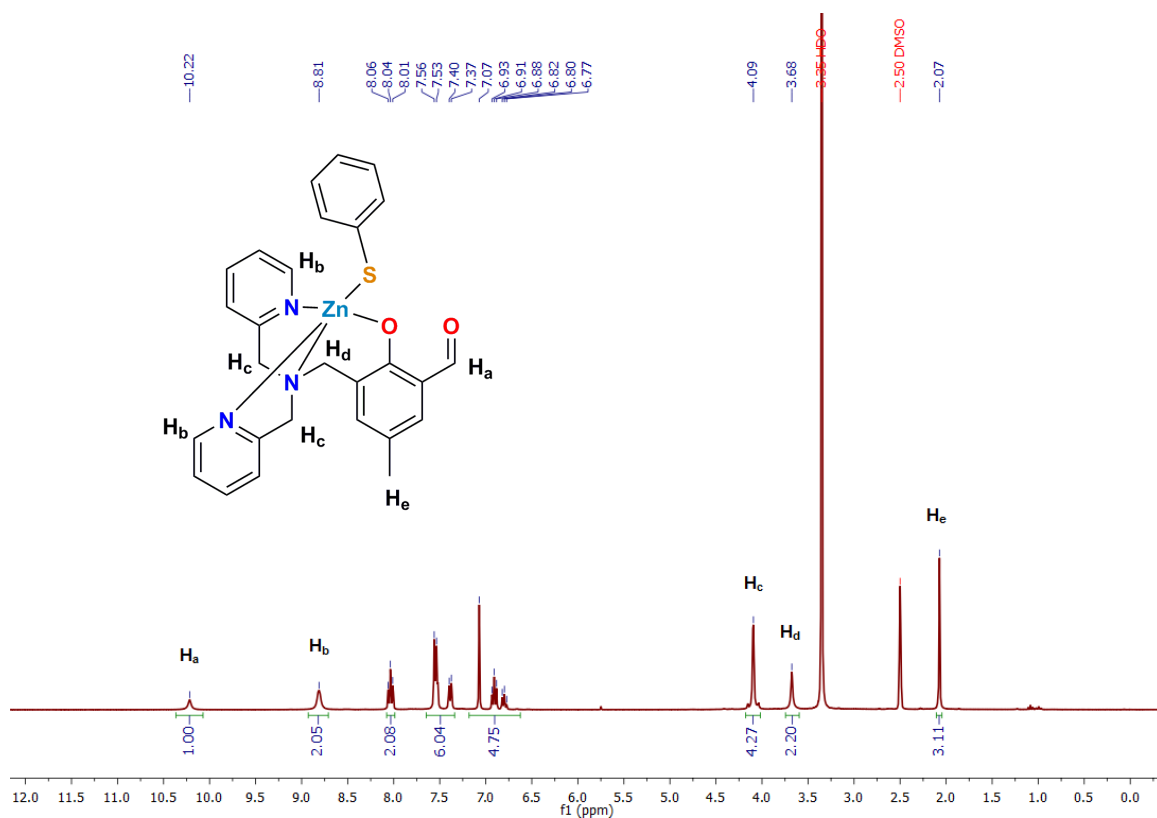

**Figure S1.**  $^1\text{H}$  NMR (300 MHz,  $\text{DMSO-d}_6$ ) spectrum of  $[(\text{Py}2\text{ald})\text{Zn}(\text{SPh})]$  ( $1\text{a}^{\text{Zn}}$ ).

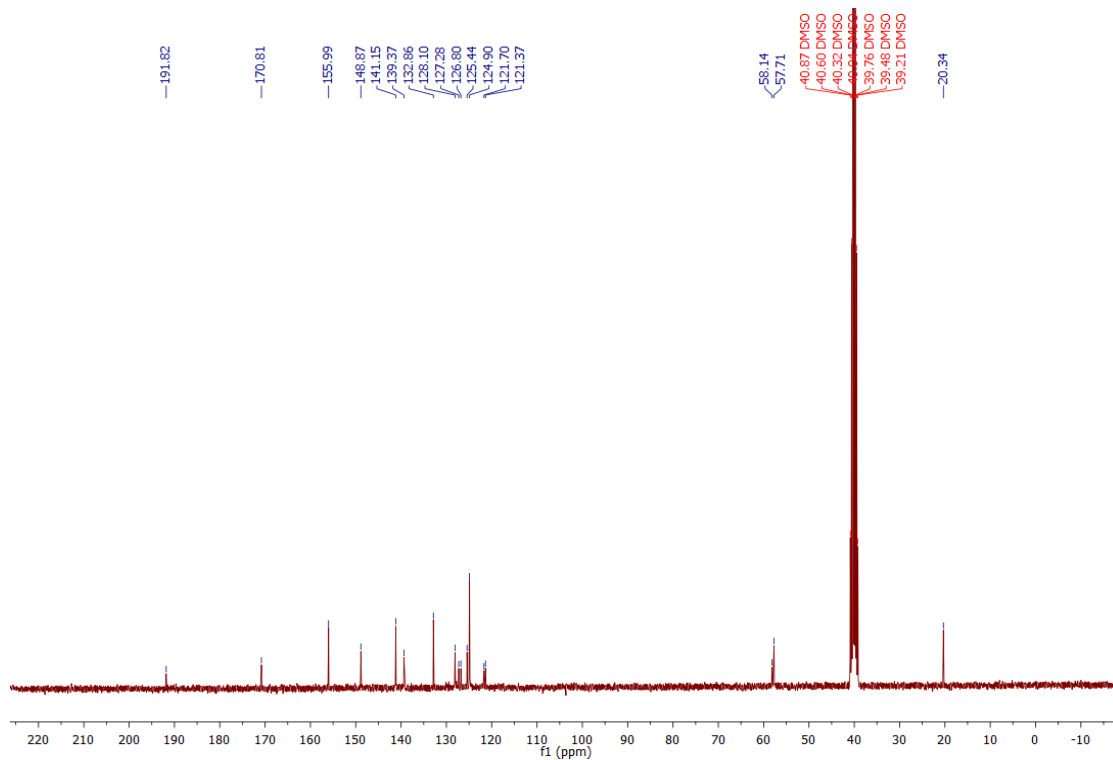

**Figure S2.**  $^{13}\text{C}$  NMR (75 MHz,  $\text{DMSO-d}_6$ ) spectrum of  $[(\text{Py}2\text{ald})\text{Zn}(\text{SPh})]$  ( $1\text{a}^{\text{Zn}}$ ).

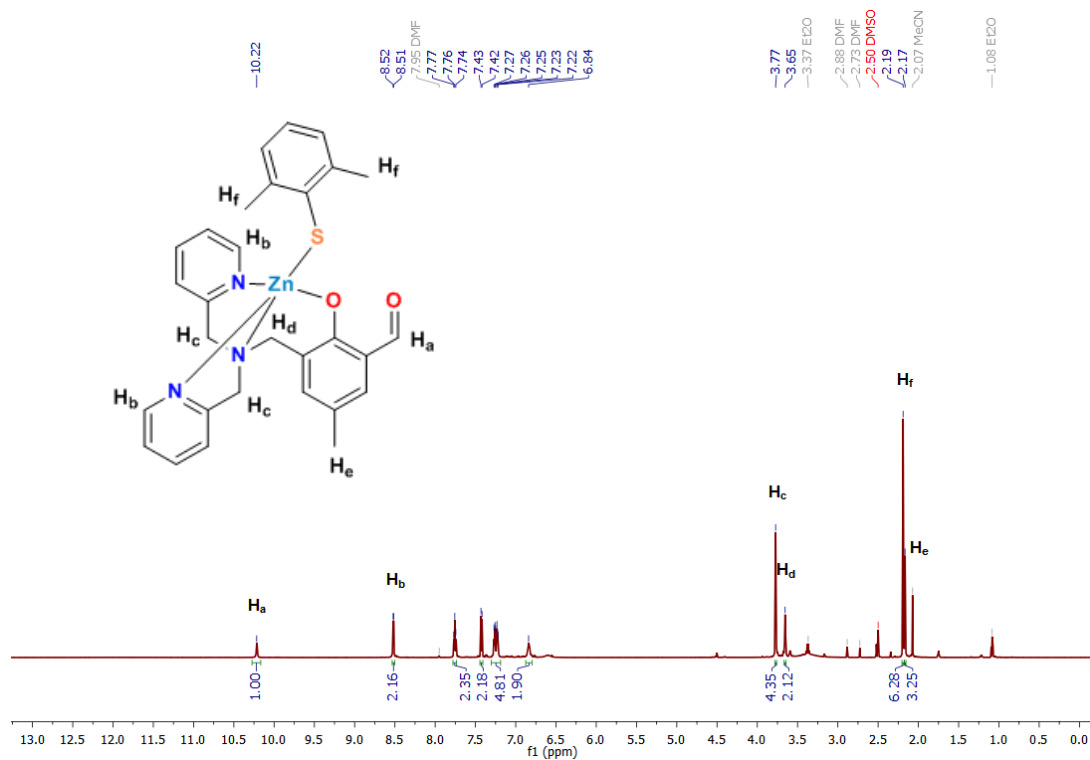

Figure S3.  $^1\text{H}$  NMR (600 MHz,  $\text{DMSO-d}_6$ ) spectrum of  $[(\text{Py}2\text{ald})\text{Zn}(\text{SC}_6\text{H}_4-2,6\text{-Me}_2)]$  ( $1\text{b}^{\text{Zn}}$ ).

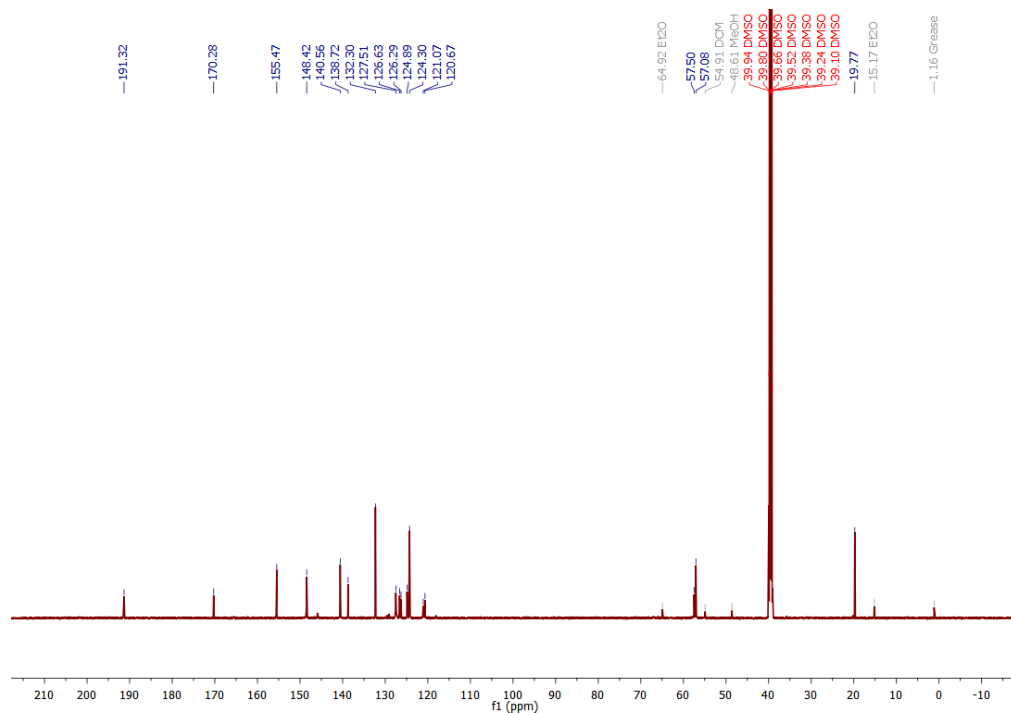

Figure S4.  $^{13}\text{C}$  NMR (150 MHz,  $\text{DMSO-d}_6$ ) spectrum of  $[(\text{Py}2\text{ald})\text{Zn}(\text{SC}_6\text{H}_4-2,6\text{-Me}_2)]$  ( $1\text{b}^{\text{Zn}}$ ).

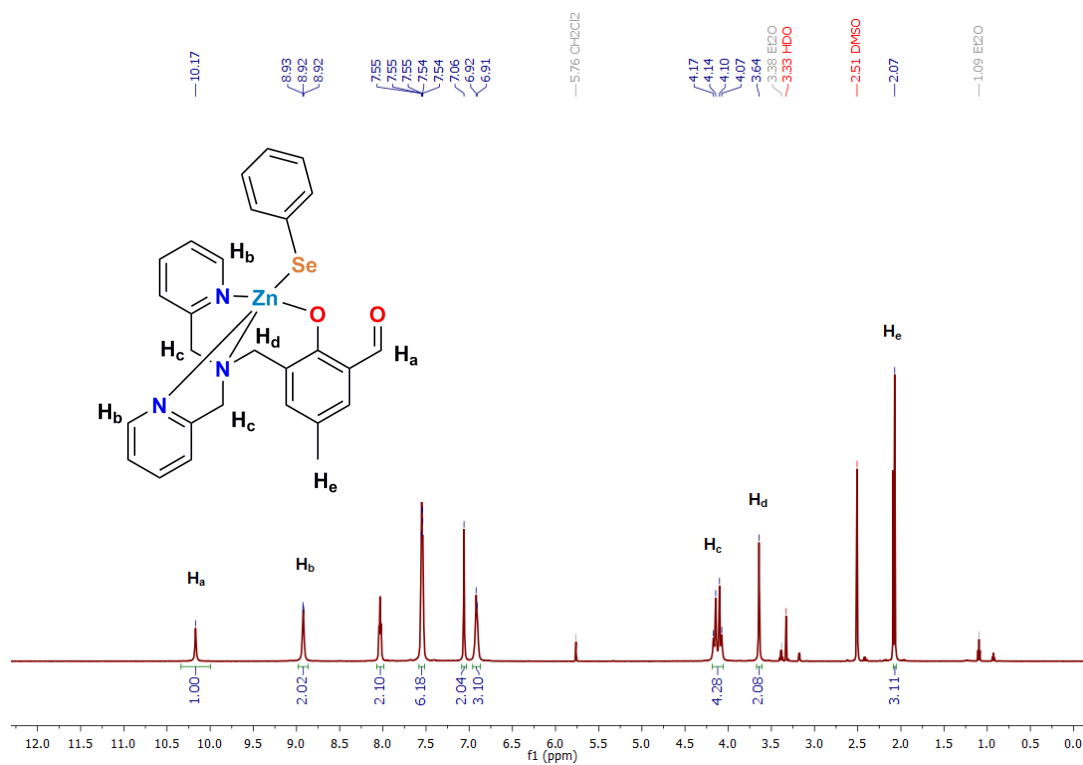

**Figure S5.**  $^1\text{H}$  NMR (600 MHz,  $\text{DMSO-d}_6$ ) spectrum of  $[(\text{Py}2\text{ald})\text{Zn}(\text{SePh})]$  ( $2^{\text{Zn}}$ ).

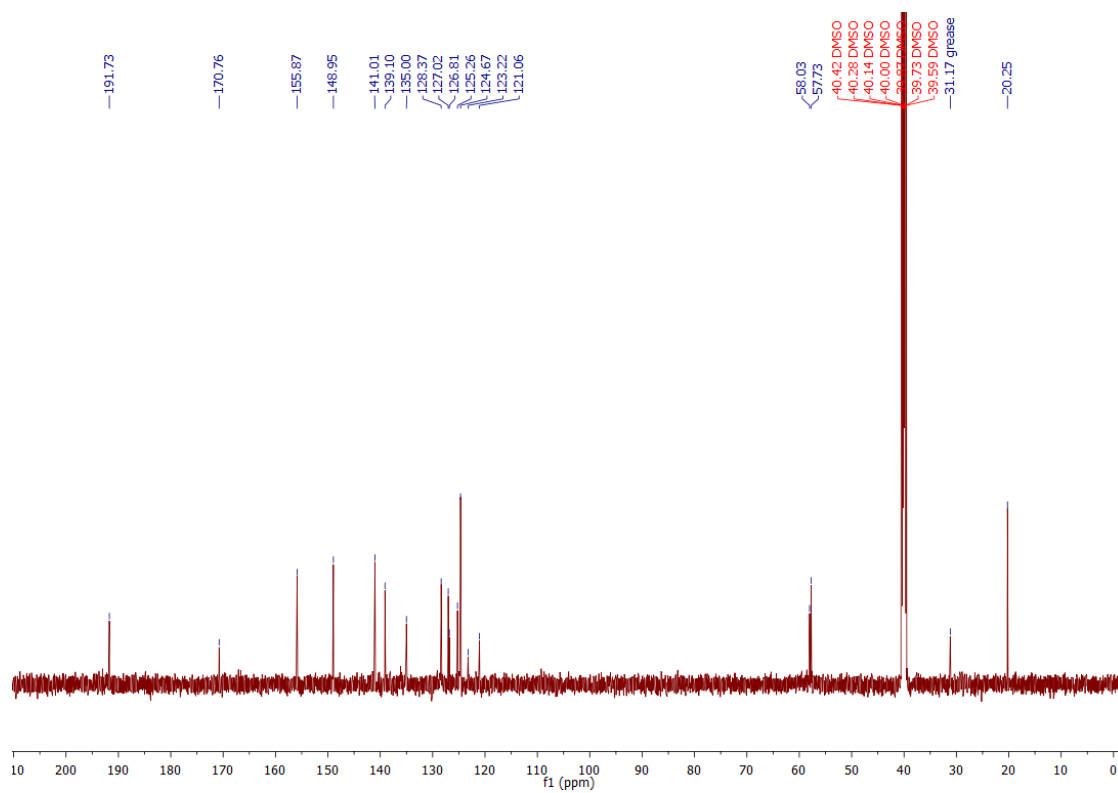

**Figure S6.**  $^{13}\text{C}$  NMR (151 MHz,  $\text{DMSO-d}_6$ ) spectrum of  $[(\text{Py}2\text{ald})\text{Zn}(\text{SePh})]$  ( $2^{\text{Zn}}$ ).



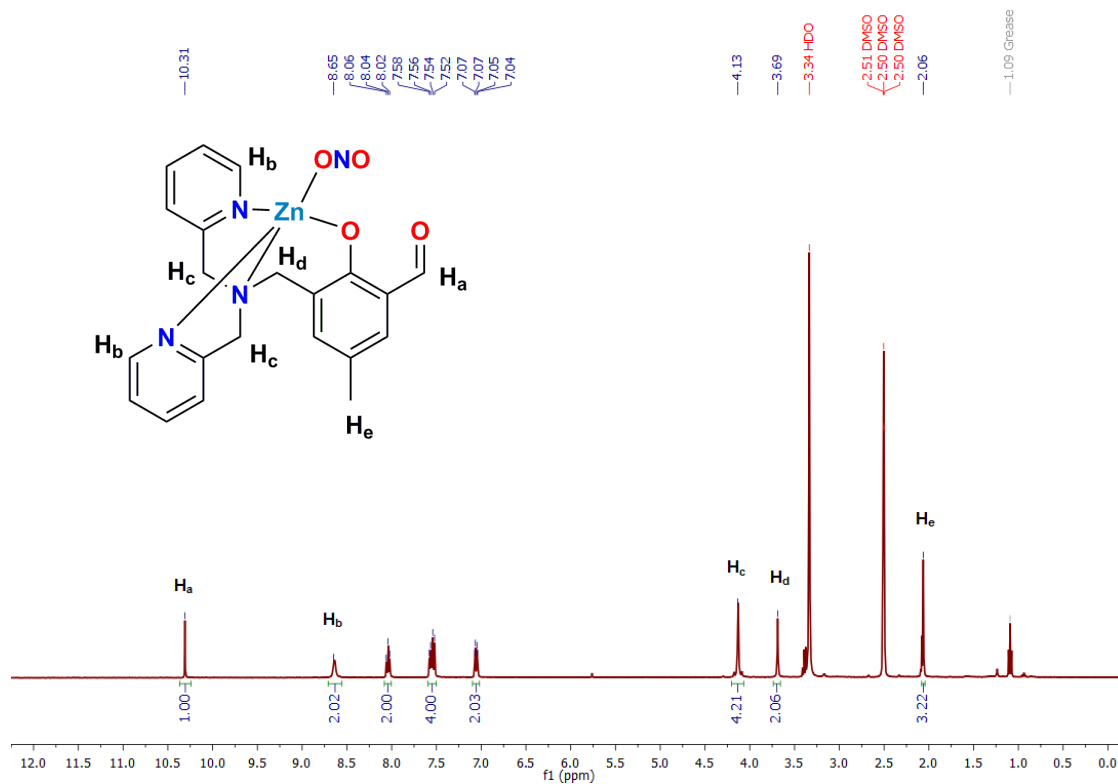

**Figure S7.**  $^1\text{H}$  NMR (400 MHz,  $\text{DMSO-d}_6$ ) spectrum of  $[(\text{Py}2\text{ald})\text{Zn}(\text{ONO})]$  ( $3^{\text{Zn}}$ ).

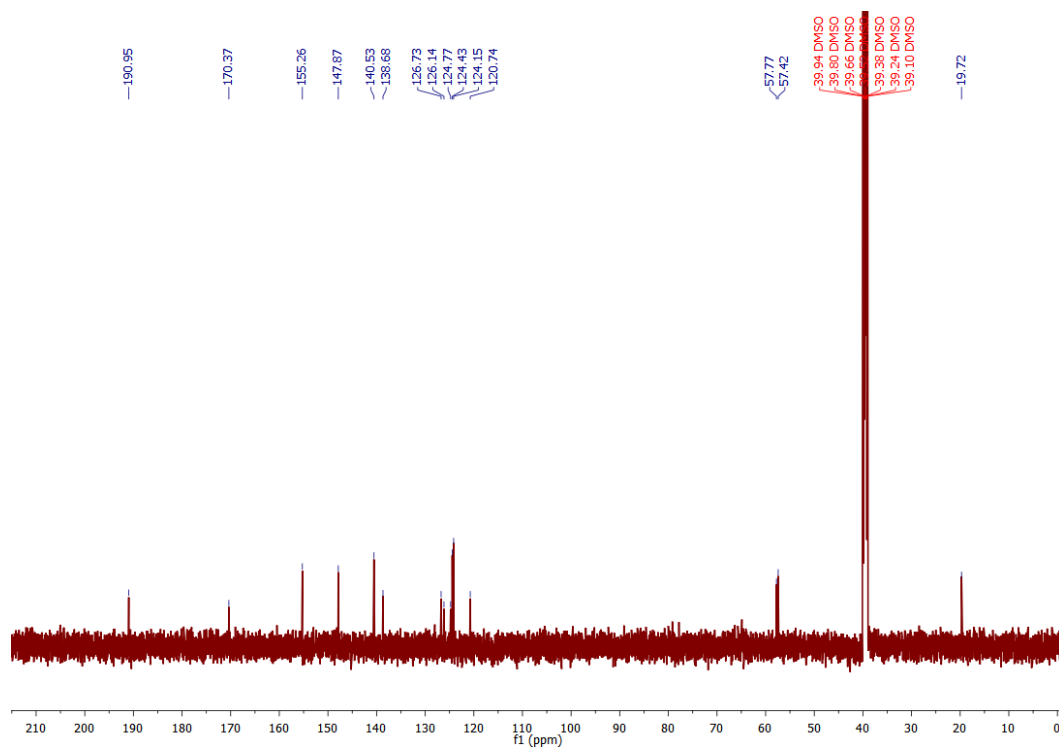

**Figure S8.**  $^{13}\text{C}$  NMR (150 MHz,  $\text{DMSO-d}_6$ ) spectrum of  $[(\text{Py}2\text{ald})\text{Zn}(\text{ONO})]$  ( $3^{\text{Zn}}$ ).

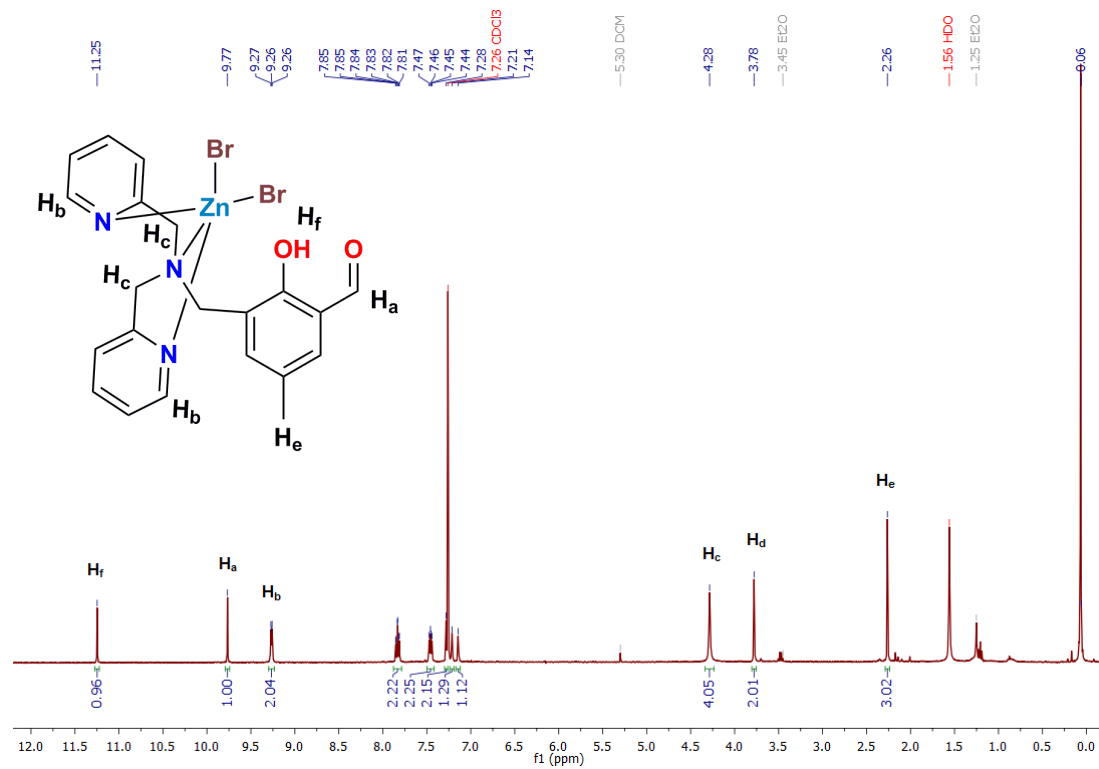

**Figure S9.**  $^1\text{H}$  NMR (400 MHz,  $\text{CDCl}_3$ ) spectrum of  $[(\text{Py}2\text{ald})\text{Zn}(\text{Br})_2]$  ( $4^{\text{Zn}}$ ).

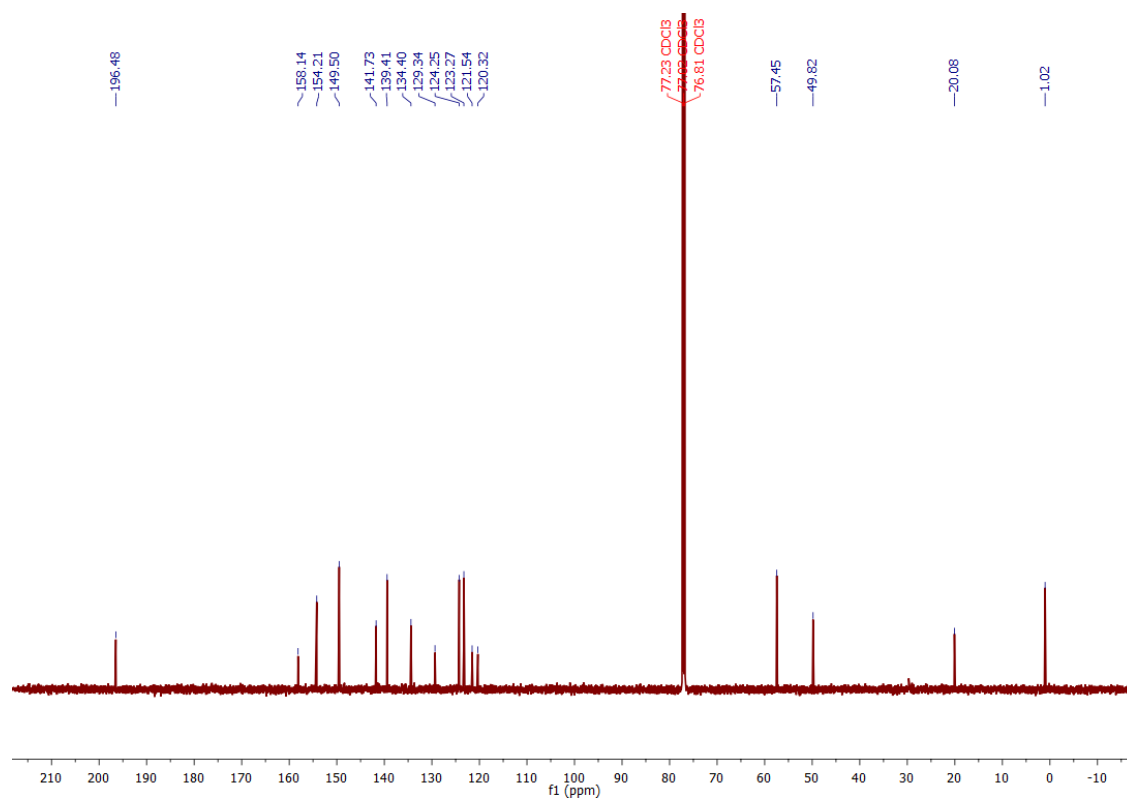

**Figure S10.**  $^{13}\text{C}$  NMR (150 MHz,  $\text{CDCl}_3$ ) spectrum of  $[(\text{Py}2\text{ald})\text{Zn}(\text{Br})_2]$  ( $4^{\text{Zn}}$ ).

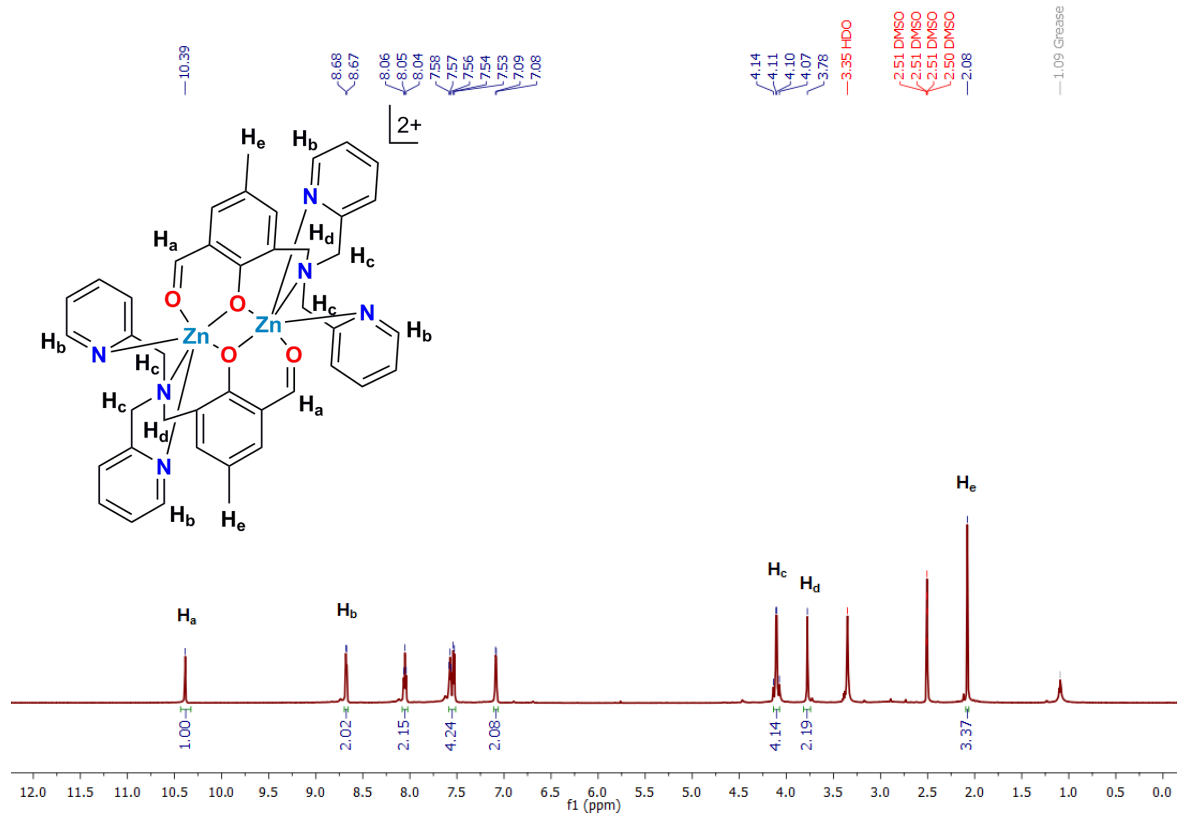

**Figure S11.**  $^1\text{H}$  NMR (600 MHz,  $\text{DMSO-d}_6$ ) spectrum of  $[(\text{Py}2\text{ald})\text{Zn}]_2(\text{BF}_4)_2(5\text{Zn}(\text{BF}_4)_2)$ .

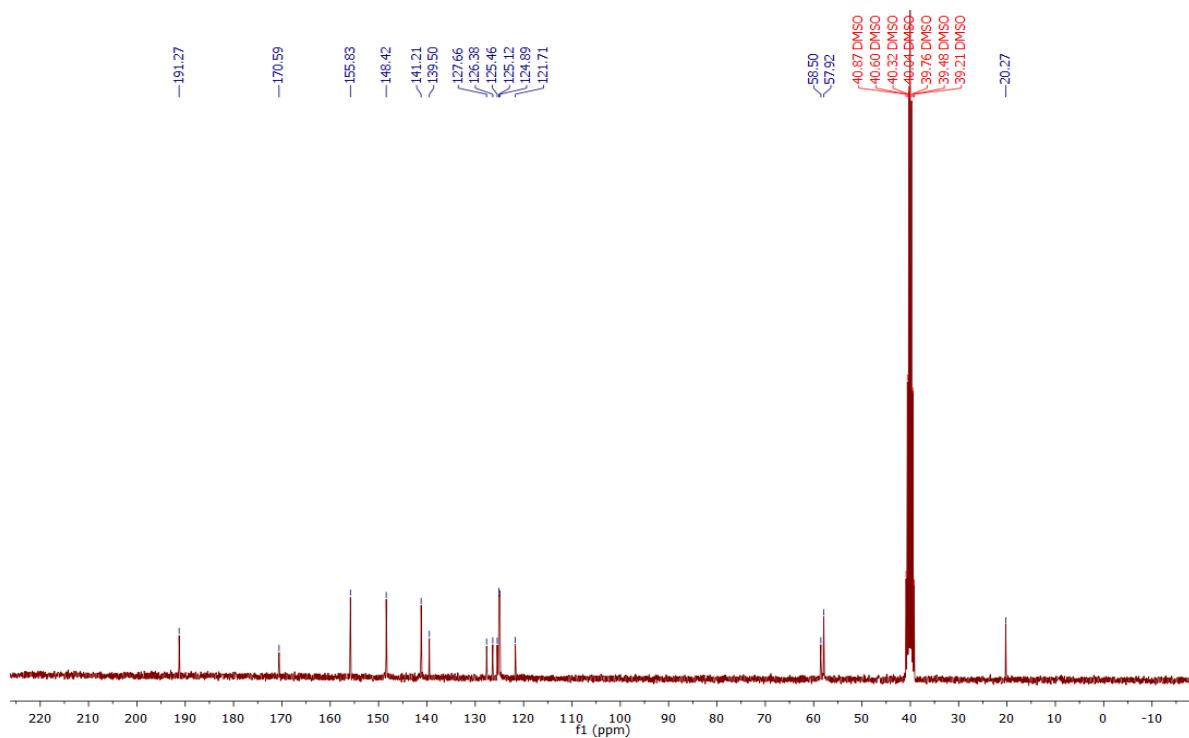

**Figure S12.**  $^{13}\text{C}$  NMR (75 MHz,  $\text{DMSO-d}_6$ ) spectrum of  $[(\text{Py}2\text{ald})\text{Zn}]_2(\text{BF}_4)_2(5\text{Zn}(\text{BF}_4)_2)$ .

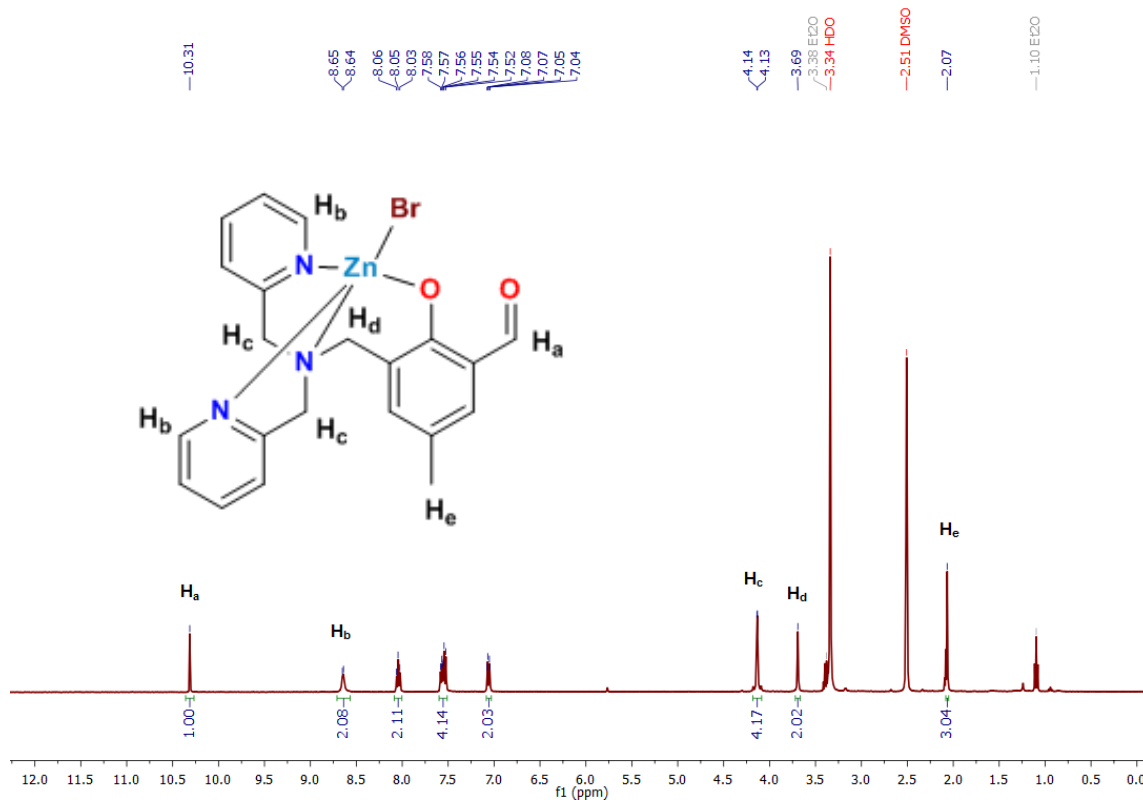

**Figure S13.**  $^1\text{H}$  NMR (400 MHz,  $\text{DMSO-d}_6$ ) spectrum of  $[(\text{Py}2\text{ald})\text{Zn}(\text{Br})]$  ( $6^{\text{Zn}}$ ).

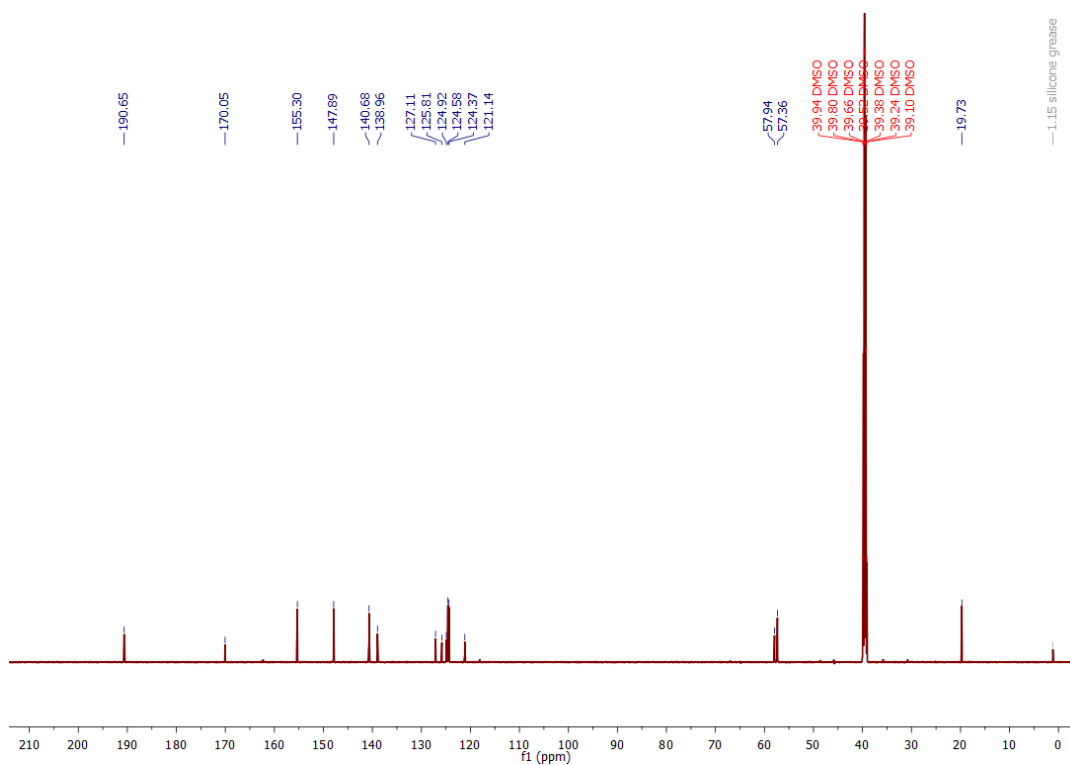

**Figure S14.**  $^{13}\text{C}$  NMR (150 MHz,  $\text{DMSO-d}_6$ ) spectrum of  $[(\text{Py}2\text{ald})\text{Zn}(\text{Br})]$  ( $6^{\text{Zn}}$ ).

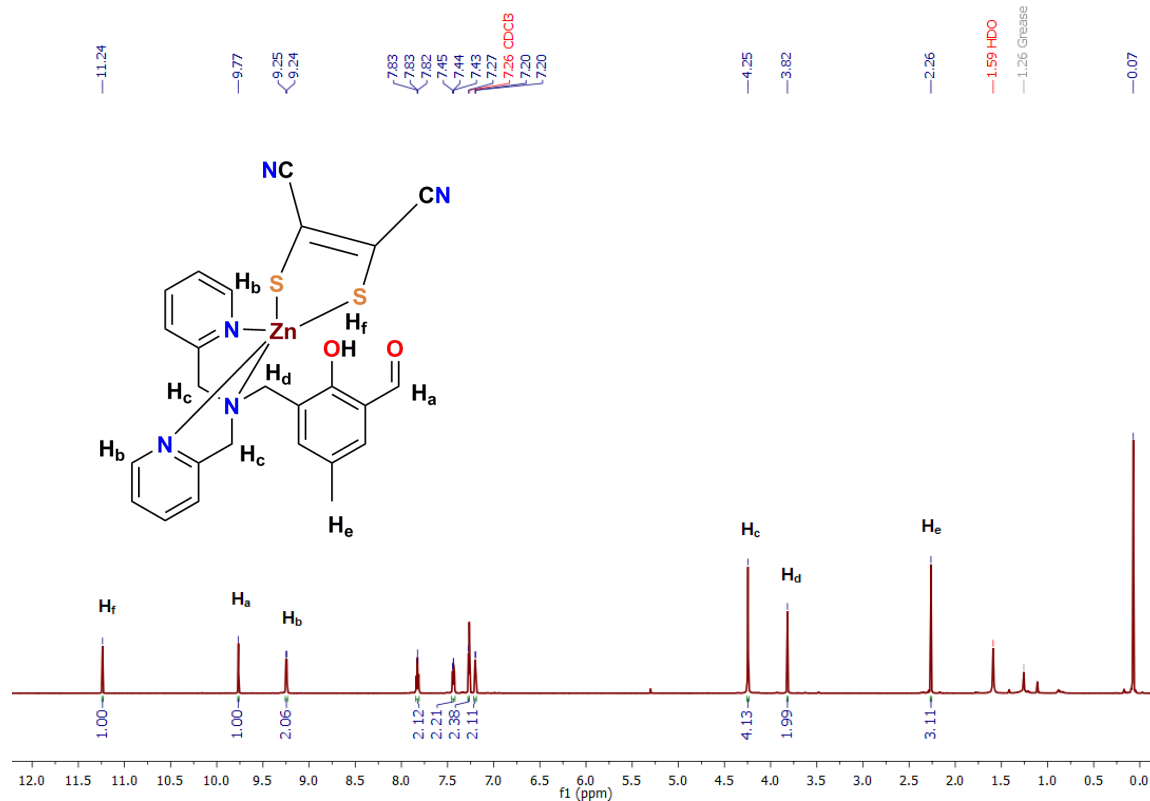

**Figure S15.**  $^1\text{H}$  NMR (600 MHz,  $\text{CDCl}_3$ ) spectrum of  $[(\text{Py}2\text{ald})\text{Zn}(\text{mnt})]$  ( $7^{\text{Zn}}$ ).

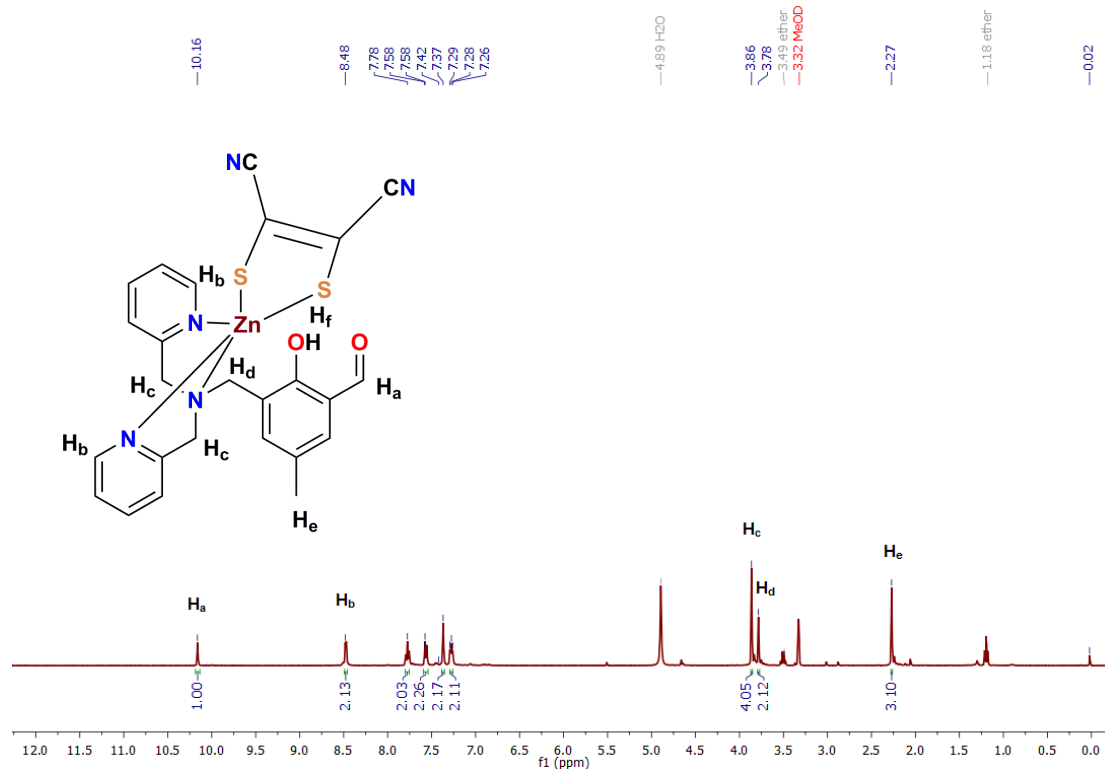

**Figure S16.**  $^1\text{H}$  NMR (400 MHz,  $\text{CD}_3\text{OD}$ ) spectrum of  $[(\text{Py}2\text{ald})\text{Zn}(\text{mnt})]$  ( $7^{\text{Zn}}$ ).

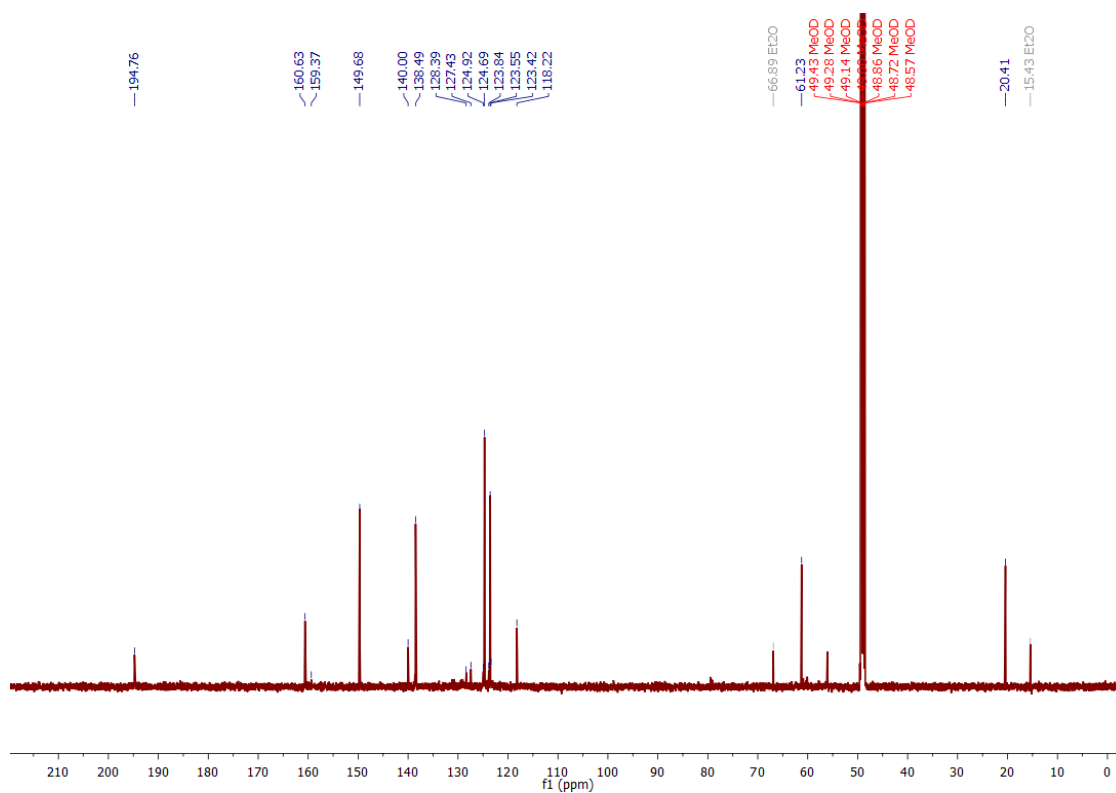

**Figure S17.**  $^{13}\text{C}$  NMR (150 MHz,  $\text{CDCl}_3$ ) spectrum of  $[(\text{Py}2\text{ald})\text{Zn}(\text{mnt})]$  ( $7\text{Zn}$ ).

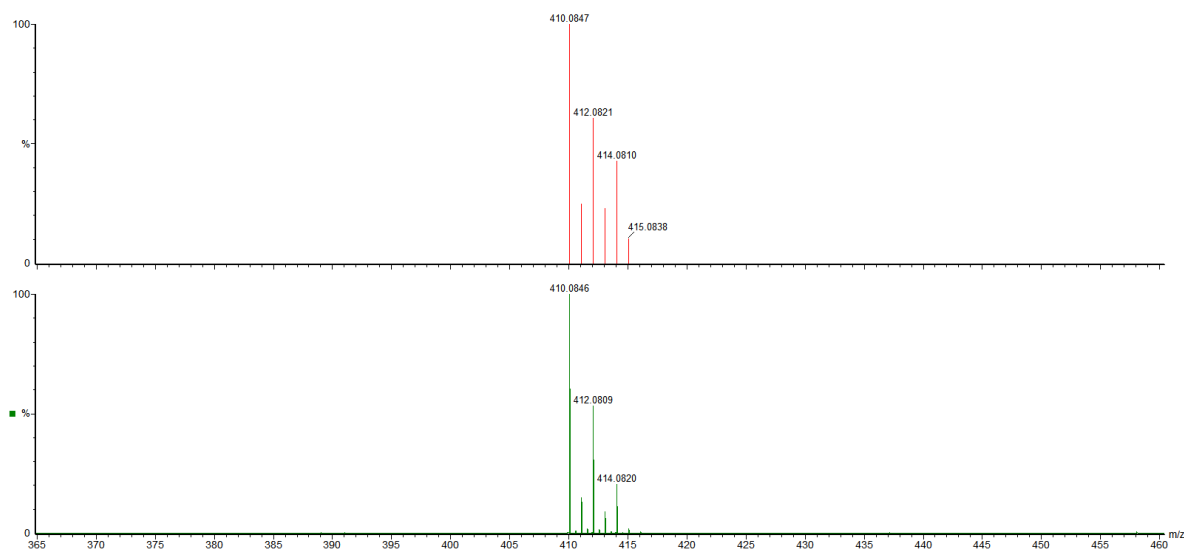

**Figure S18.** Mass spectrometric data (in MeCN) for  $[(\text{Py}2\text{ald})\text{Zn}]_2(\text{BF}_4)_2$  ( $5\text{Zn}(\text{BF}_4)_2$ ) shows the presence of  $[(\text{Py}2\text{ald})\text{Zn}]^+$  (m/z: 410.0847, simulated data, orange line; 410.0846, observed data, green line).

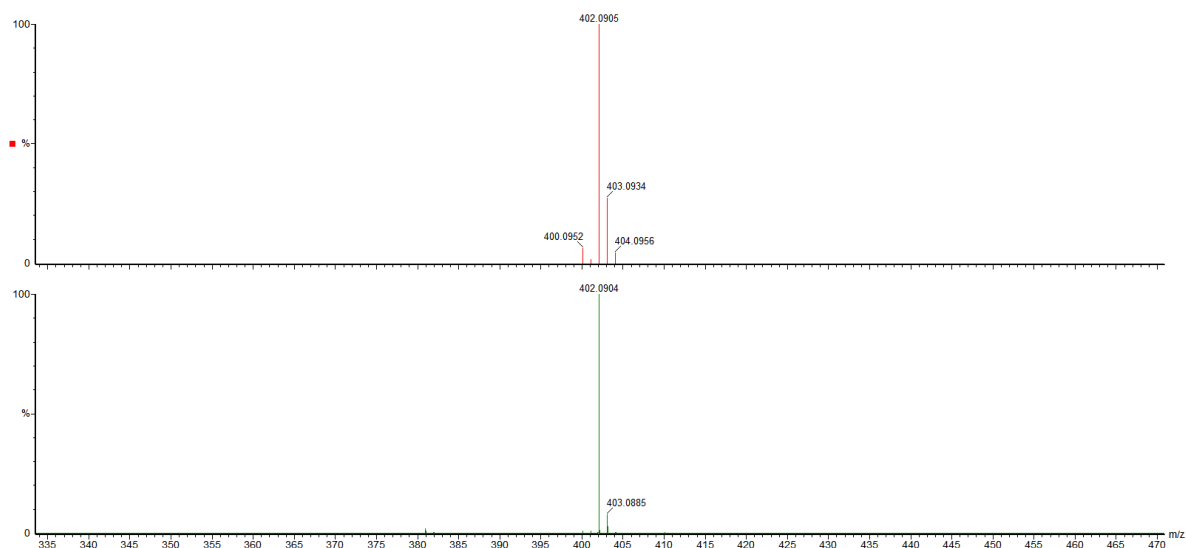

**Figure S19.** Mass spectrometric data (in MeCN) for  $[(\text{Py}2\text{ald})\text{Fe}]_2(\text{BF}_4)_2$  ( $5^{\text{Fe}}(\text{BF}_4)_2$ ) shows the presence of  $[(\text{Py}2\text{ald})\text{Fe}]^+$  ( $m/z$ : 402.0905, simulated data, orange line; 402.0904, observed data, green line).

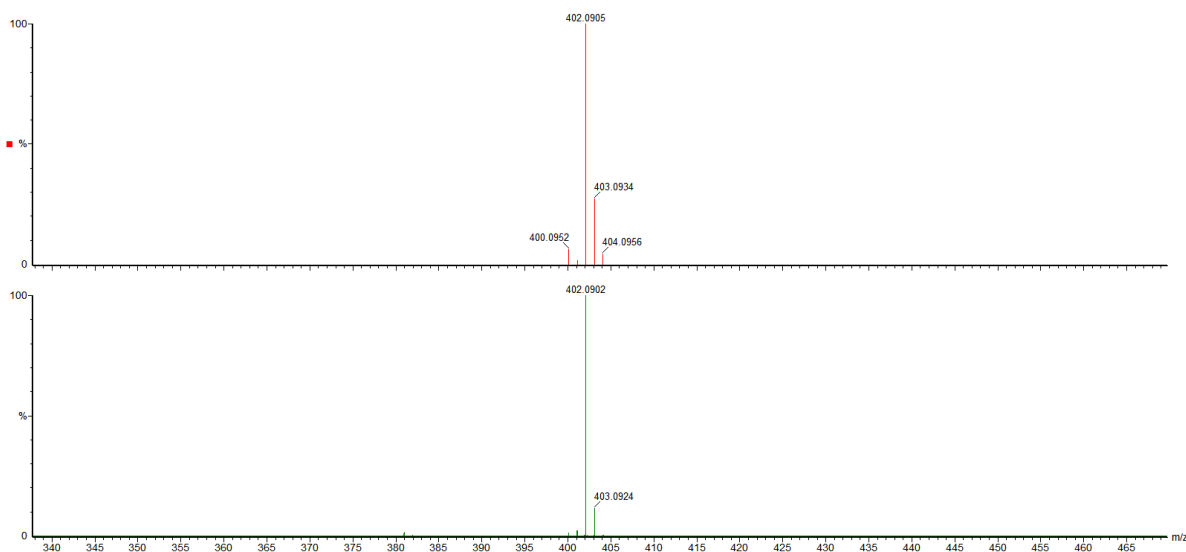

**Figure S20.** Mass spectrometric data (in MeCN) for  $[(\text{Py}2\text{ald})\text{Fe}]_2(\text{BPh}_4)_2$  ( $5^{\text{Fe}}(\text{BPh}_4)_2$ ) shows the presence of  $[(\text{Py}2\text{ald})\text{Fe}]^+$  ( $m/z$ : 402.0905, simulated data, orange line; 402.0902, observed data, green line).

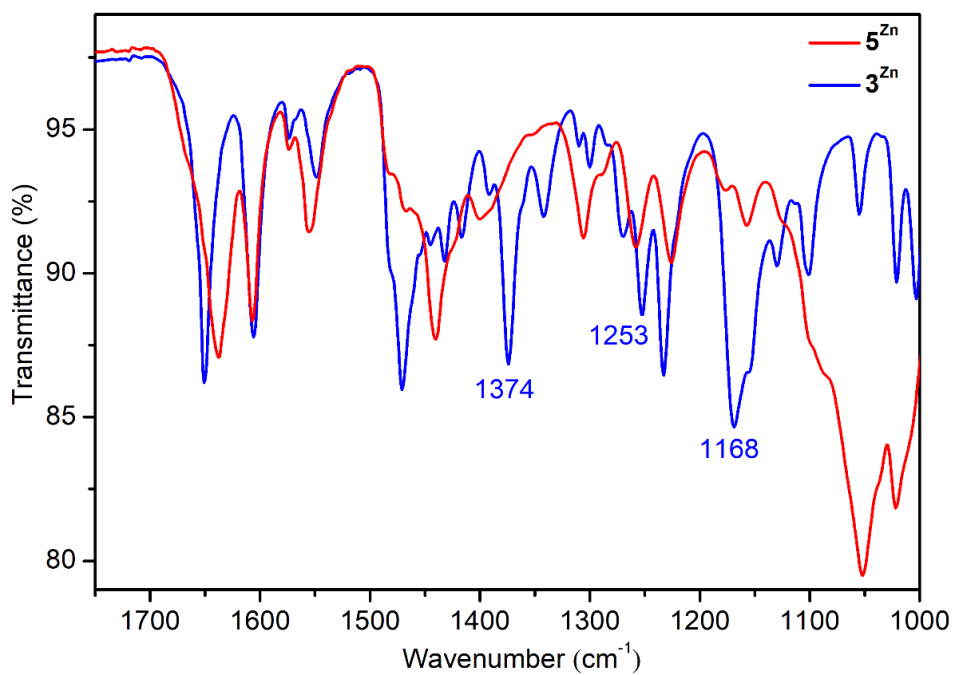

**Figure S21.** IR spectra (ATR) of [(Py2ald)Zn(ONO)] ( $3^{Zn}$ ) along with that of [(Py2ald)Zn] $_2$ (BF $_4$ ) $_2$  ( $5^{Zn}$ (BF $_4$ ) $_2$ ) used as a control.

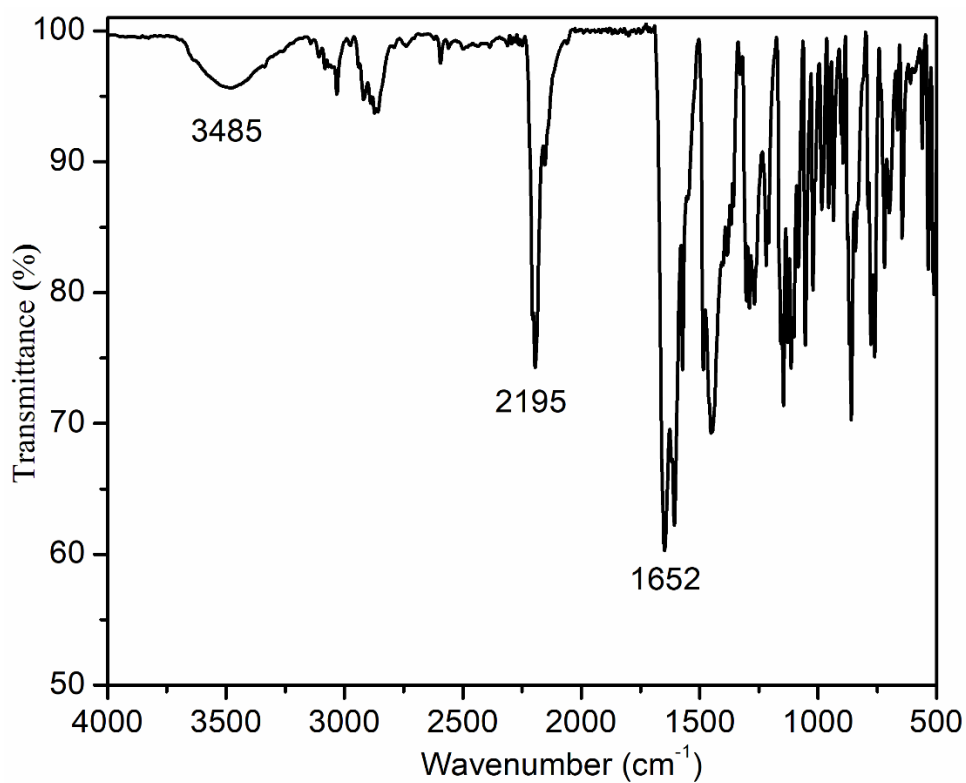

**Figure S22.** IR spectra (KBr pellet) of [(Py2ald)Zn(mnt)] ( $7^{Zn}$ ) shows  $\nu_{O-H}$  (H-bonded) = 3485  $cm^{-1}$ ,  $\nu_{CN}$  = 2195  $cm^{-1}$  and  $\nu_{CHO}$  = 1652  $cm^{-1}$ .



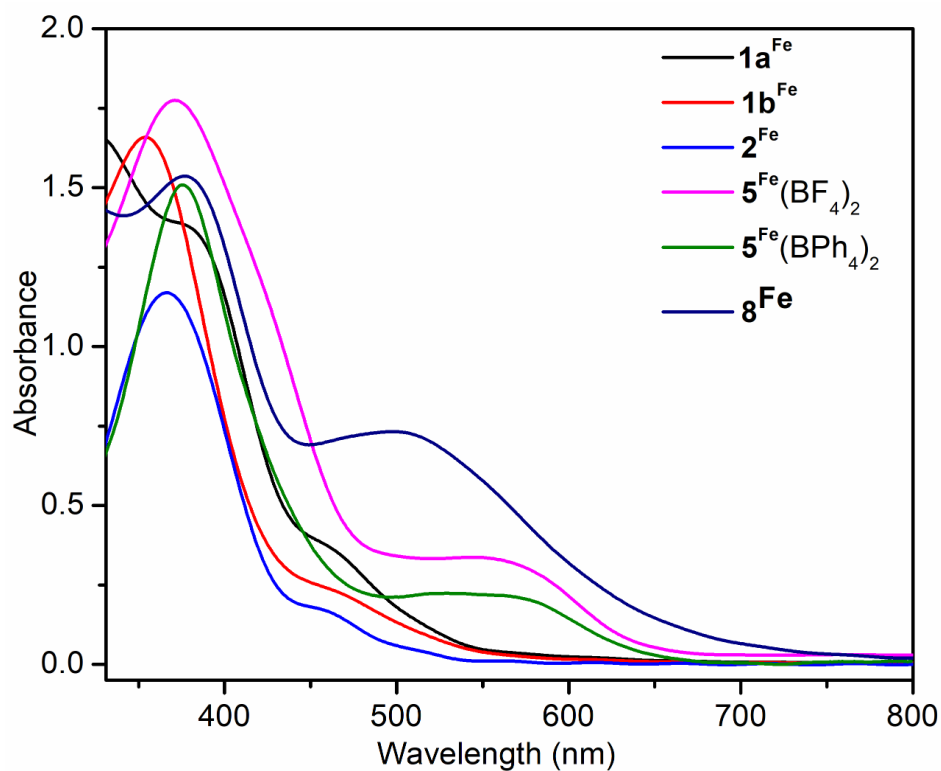

**Figure S23.** Electronic absorption spectroscopic signatures for the iron compounds in  $\text{CH}_2\text{Cl}_2$  (0.25 mM).

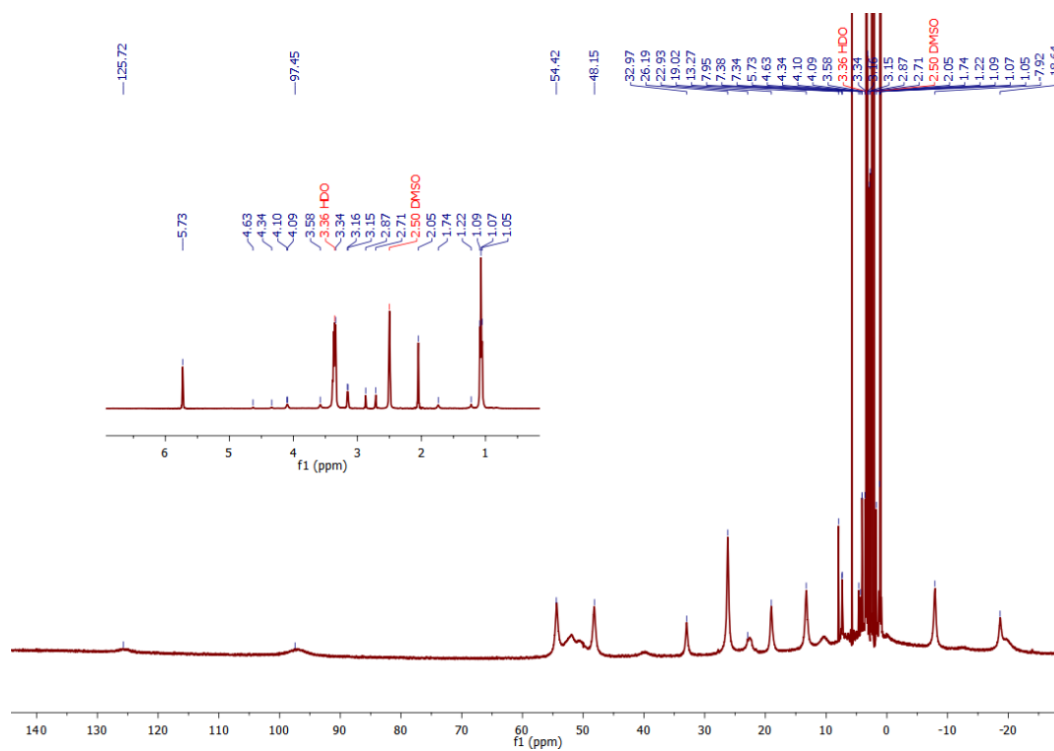

**Figure S24.**  $^1\text{H}$  NMR (400 MHz,  $\text{DMSO-d}_6$ ) spectrum of  $[(\text{Py}2\text{ald})\text{Fe}(\text{SPh})]$  ( $1\text{a}^{\text{Fe}}$ ).

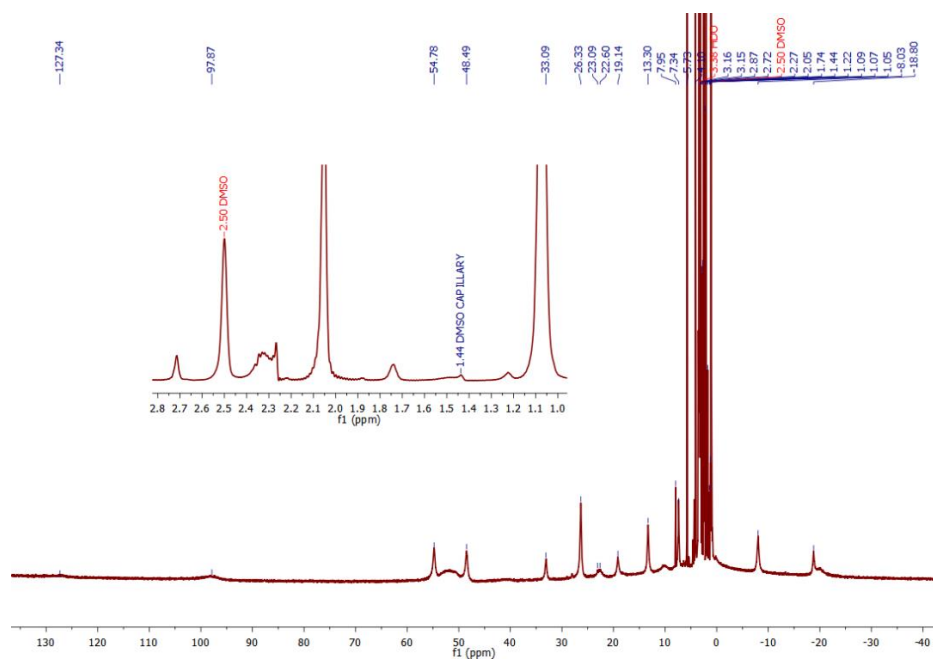

**Figure S25.**  $^1\text{H}$  NMR (400 MHz,  $\text{DMSO-d}^6$ ) spectrum of  $[(\text{Py}2\text{ald})\text{Fe}(\text{SPh})]$  ( $\mathbf{1a}^{\text{Fe}}$ ), recorded in a coaxial NMR tube, with  $\text{DMSO-d}^6$  inside. Inset shows a shift in the peak of  $\text{DMSO-d}^6$ . Solution magnetic moment ( $\mu_{\text{eff}}$ ) = 4.63 BM (calculated spin only magnetic moment = 4.90 BM).

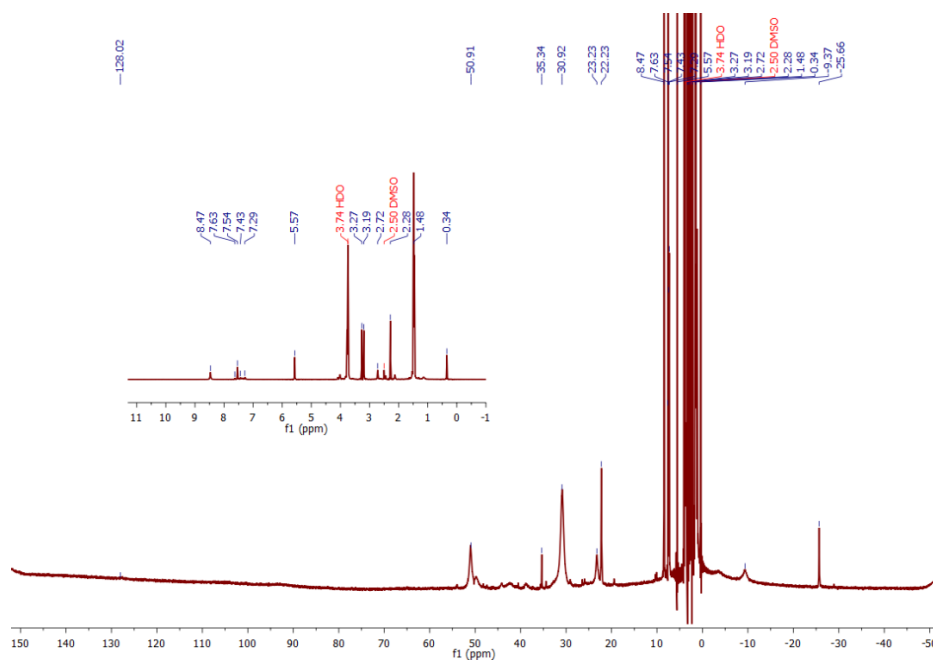

**Figure S26.**  $^1\text{H}$  NMR (400 MHz,  $\text{DMSO-d}^6$ ) spectrum of  $[(\text{Py}2\text{ald})\text{Fe}(\text{SC}_6\text{H}_4\text{-}2,6\text{-Me}_2)]$  ( $\mathbf{1b}^{\text{Fe}}$ ).

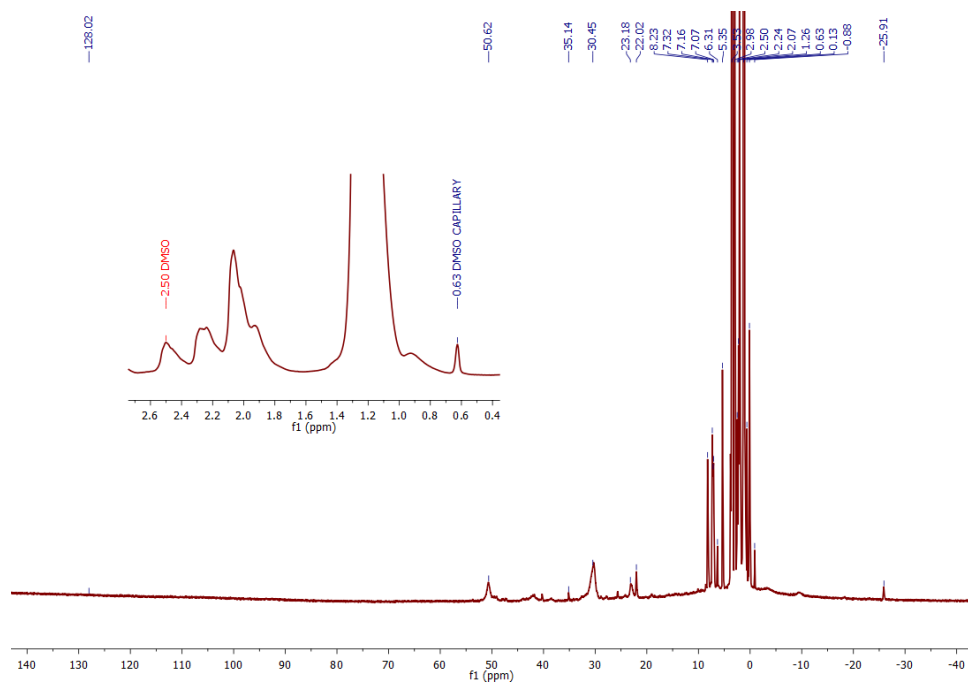

**Figure S27.** <sup>1</sup>H NMR (400 MHz, DMSO-d<sub>6</sub>) spectrum of [(Py2ald)Fe(SC<sub>6</sub>H<sub>4</sub>-2,6-Me<sub>2</sub>)] (1b<sup>Fe</sup>), recorded in a coaxial NMR tube, with DMSO-d<sub>6</sub> inside. Inset shows a shift in the peak of DMSO-d<sub>6</sub>. Solution magnetic moment ( $\mu_{\text{eff}}$ ) = 4.71 BM (calculated spin only magnetic moment = 4.90 BM).

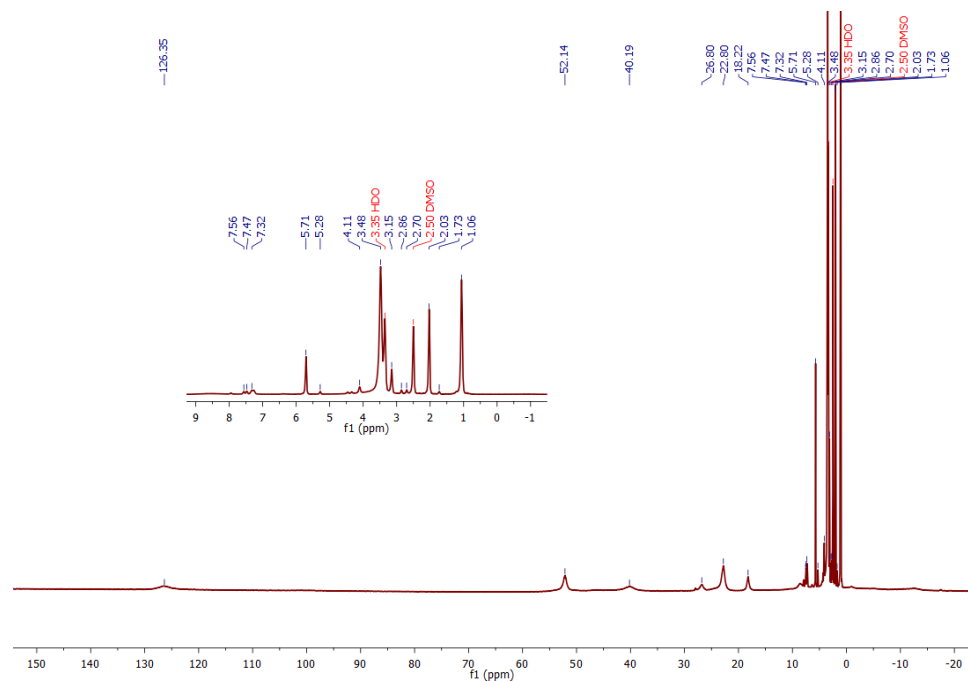

**Figure S28.** <sup>1</sup>H NMR (400 MHz, DMSO-d<sub>6</sub>) spectrum of [(Py2ald)Fe(SePh)] (2<sup>Fe</sup>).

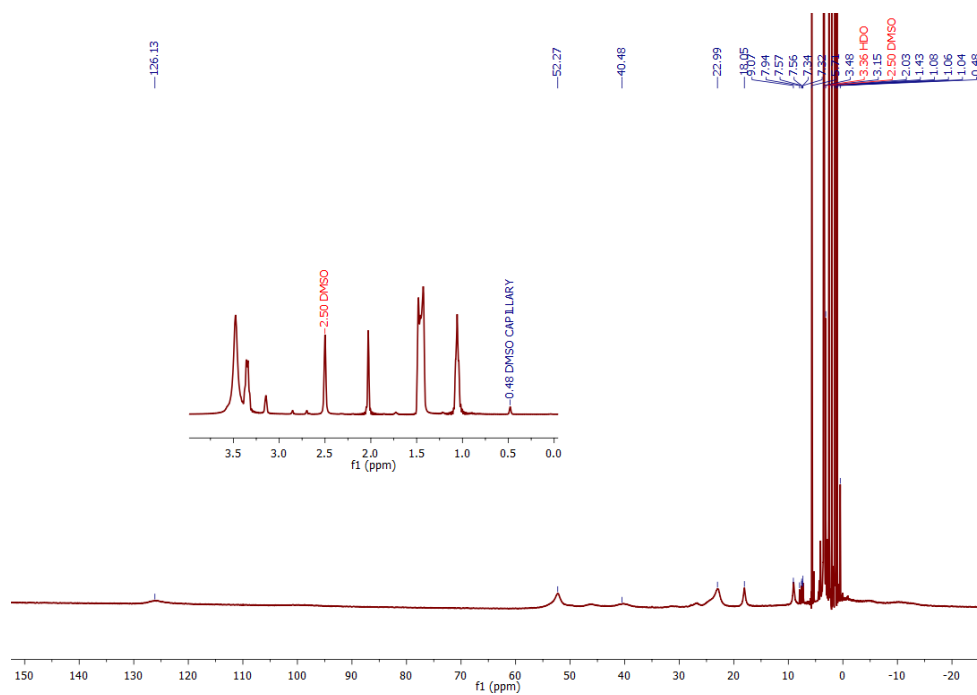

**Figure S29.**  $^1\text{H}$  NMR (400 MHz,  $\text{DMSO-d}^6$ ) spectrum of  $[(\text{Py}2\text{ald})\text{Fe}(\text{SePh})]$  ( $2^{\text{Fe}}$ ) recorded in a coaxial NMR tube, with  $\text{DMSO-d}^6$  inside. Inset shows a shift in the peak of  $\text{DMSO-d}^6$ . Solution magnetic moment ( $\mu_{\text{eff}}$ ) = 4.79 BM (calculated spin only magnetic moment = 4.90 BM).

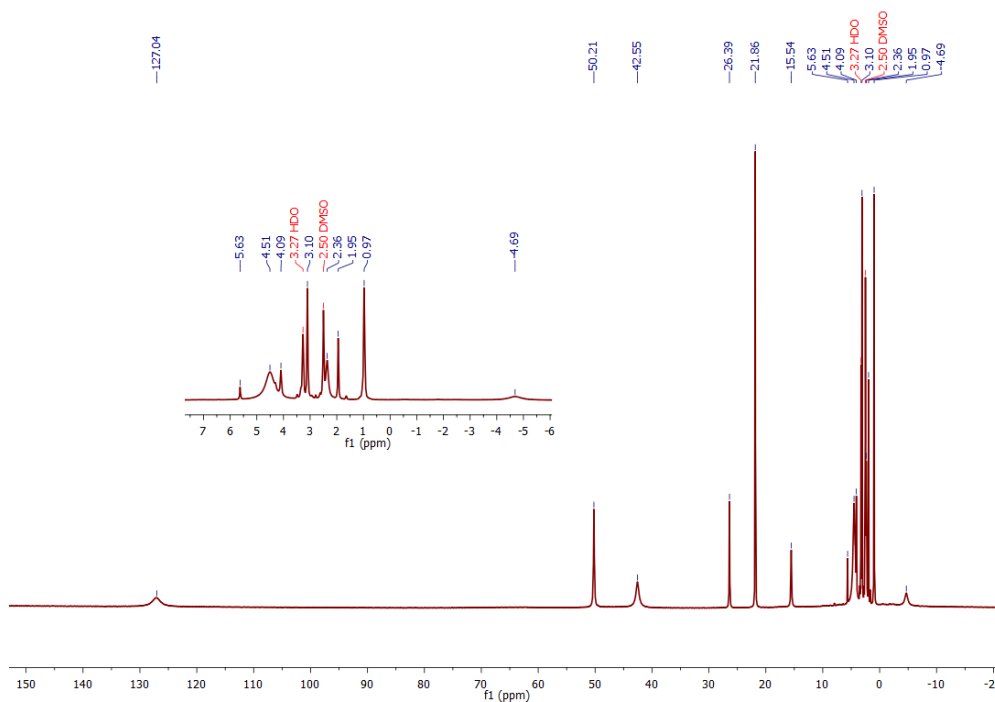

**Figure S30.**  $^1\text{H}$  NMR (400 MHz,  $\text{DMSO-d}^6$ ) spectrum of  $[(\text{Py}2\text{ald})\text{Fe}]_2(\text{BF}_4)_2(5^{\text{Fe}}(\text{BF}_4)_2)$ .

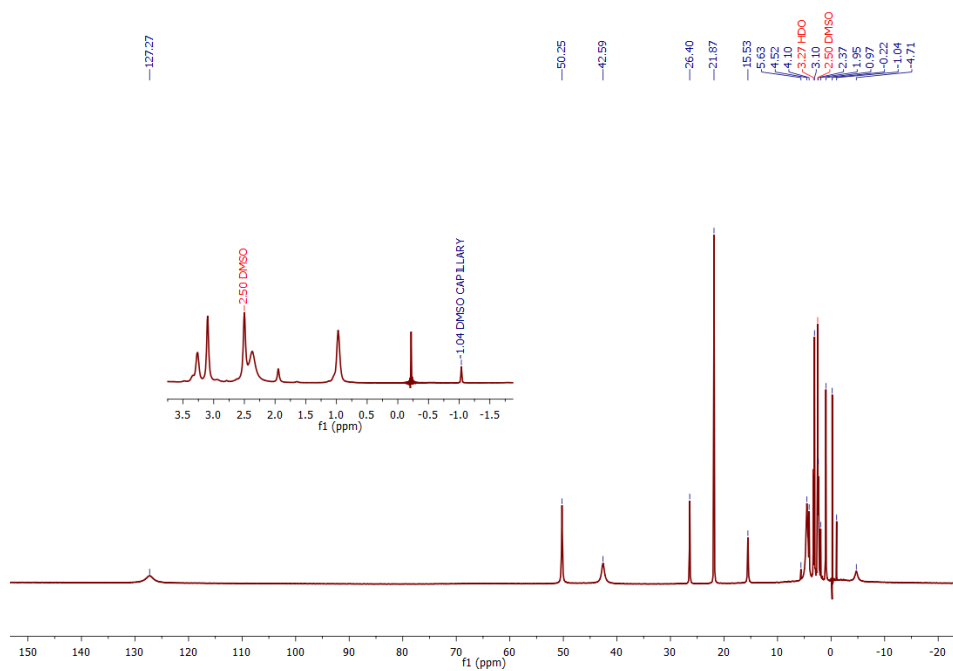

**Figure S31.**  $^1\text{H}$  NMR (400 MHz,  $\text{DMSO-d}_6$ ) spectrum of  $[(\text{Py}2\text{ald})\text{Fe}]_2(\text{BF}_4)_2(5^{\text{Fe}}(\text{BF}_4)_2)$  recorded in a coaxial NMR tube, with inside  $\text{DMSO-d}_6$ , inset shows a shift in the peak of  $\text{DMSO-d}_6$ . Solution magnetic moment ( $\mu_{\text{eff}} = 8.52$  BM (calculated spin only magnetic moment = 8.94 BM).

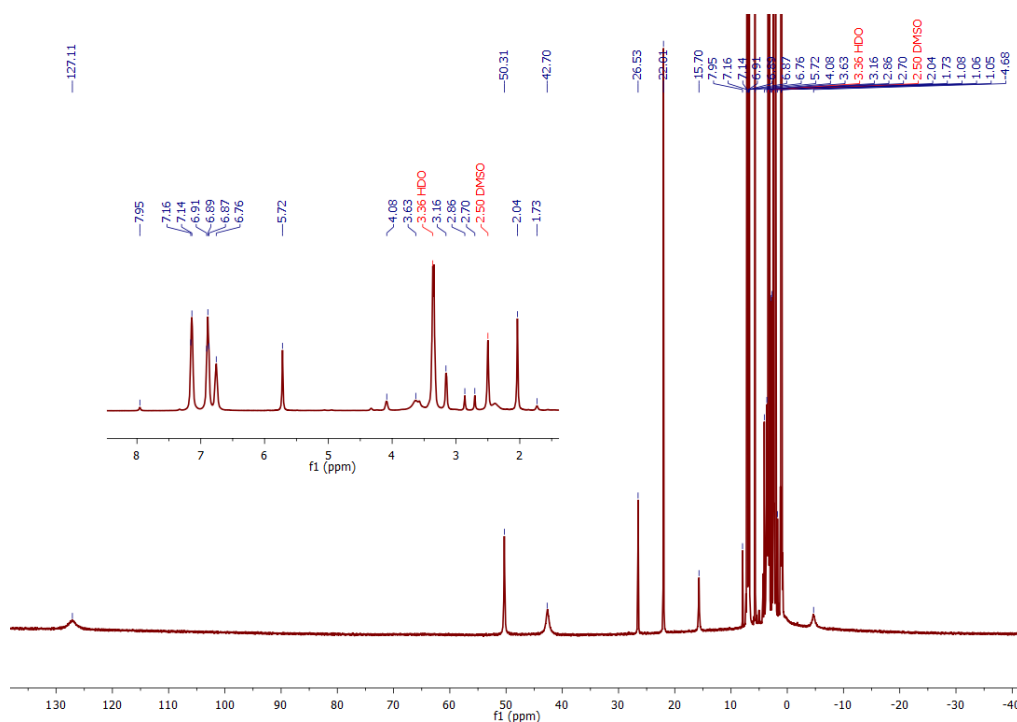

**Figure S32.**  $^1\text{H}$  NMR (400 MHz,  $\text{DMSO-d}_6$ ) spectrum of  $[(\text{Py}2\text{ald})\text{Fe}]_2(\text{BPh}_4)_2(5^{\text{Fe}}(\text{BPh}_4)_2)$ .

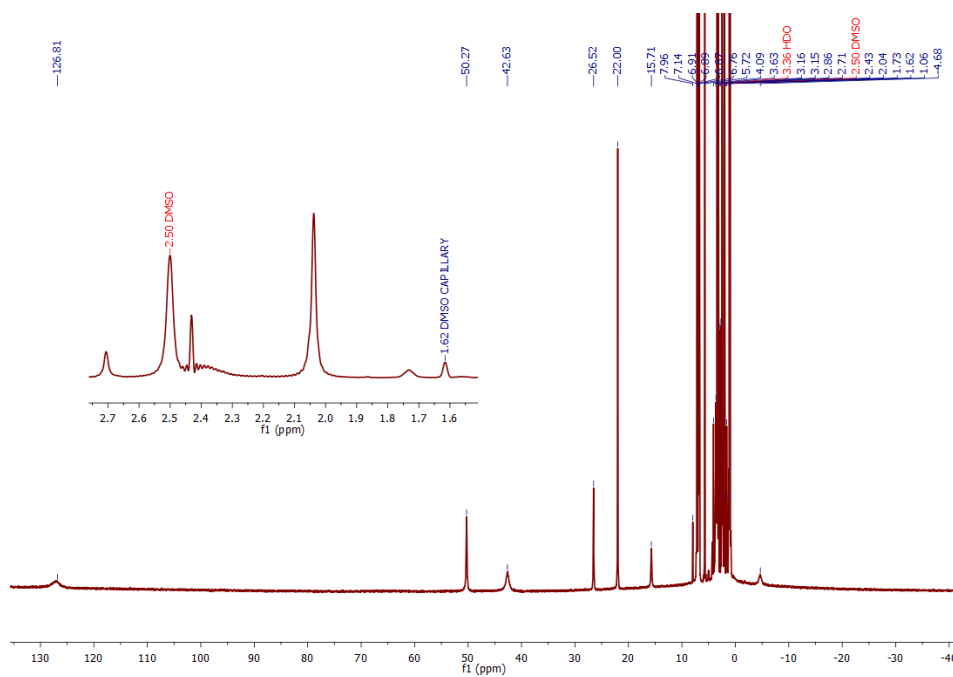

**Figure S33.**  $^1\text{H}$  NMR (400 MHz,  $\text{DMSO-d}^6$ ) spectrum of  $[(\text{Py}2\text{ald})\text{Fe}]_2(\text{BPh}_4)_2(\mathbf{5}^{\text{Fe}}(\text{BPh}_4)_2)$ , recorded in a coaxial NMR tube, with  $\text{DMSO-d}^6$  inside, inset shows a shift in the peak of  $\text{DMSO-d}^6$ . Solution magnetic moment ( $\mu_{\text{eff}}$ ) = 8.62 BM (calculated spin only magnetic moment = 8.94 BM).

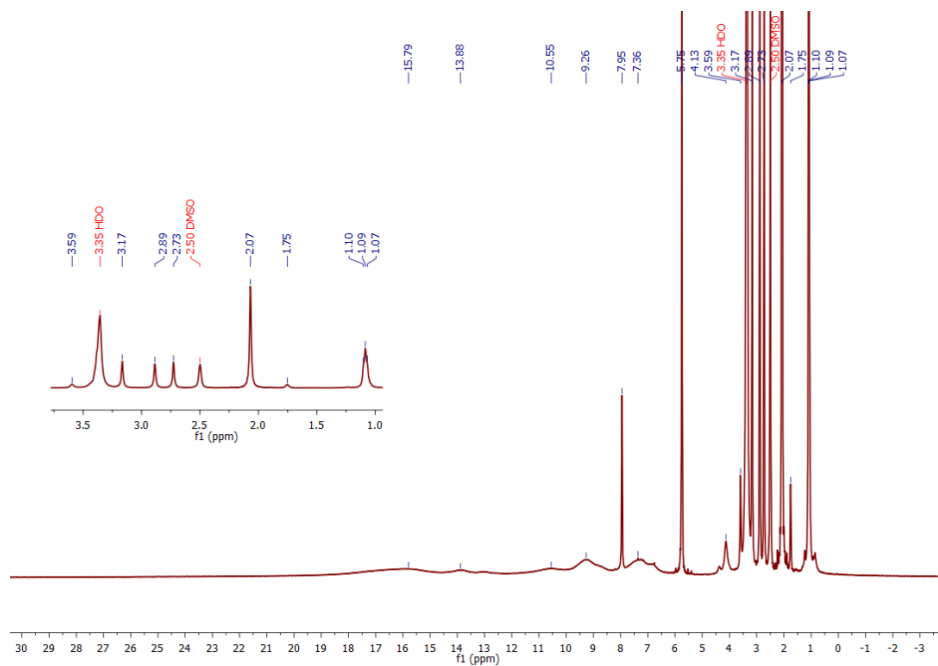

**Figure S34.**  $^1\text{H}$  NMR (400 MHz,  $\text{DMSO-d}^6$ ) spectrum of  $[\{(\text{Py}2\text{ald})(\text{ONO})\text{Fe}\}_2-\mu_2\text{-O}](\mathbf{8}^{\text{Fe}})$ .

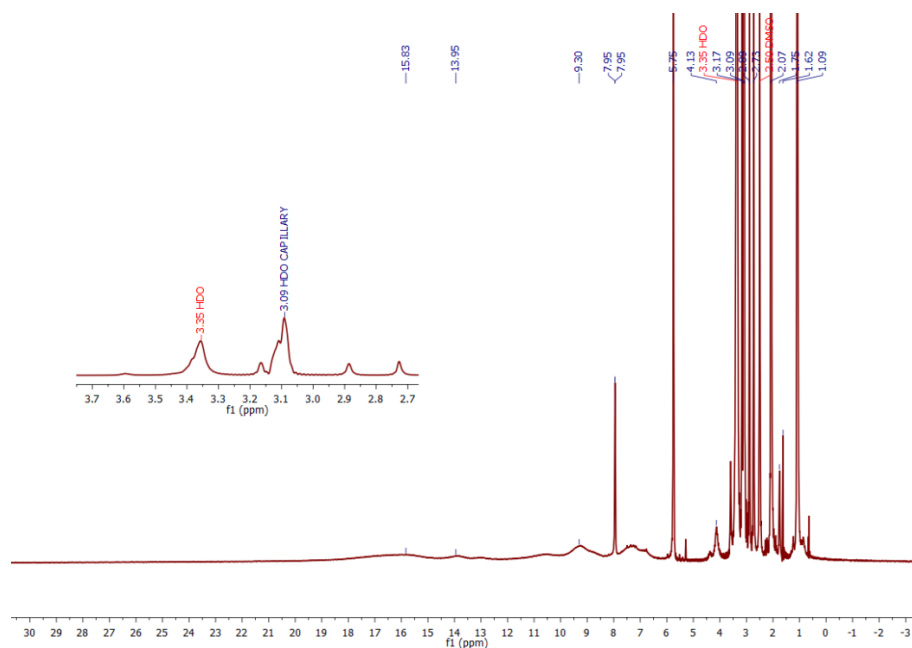

**Figure S35.**  $^1\text{H}$  NMR (400 MHz,  $\text{DMSO-d}_6$ ) spectrum of  $\{[(\text{Py}2\text{ald})(\text{ONO})\text{Fe}]_2\text{-}\mu_2\text{-O}\}(\mathbf{8}^{\text{Fe}})$ , recorded in a coaxial NMR tube, with  $\text{DMSO-d}_6$  inside, inset shows a shift in the peak of water. Solution magnetic moment ( $\mu_{\text{eff}} = 2.43$  BM (calculated spin only magnetic moment considering 10 unpaired electrons = 10.95 BM and calculated spin only magnetic moment for only two unpaired electron is 2.83).

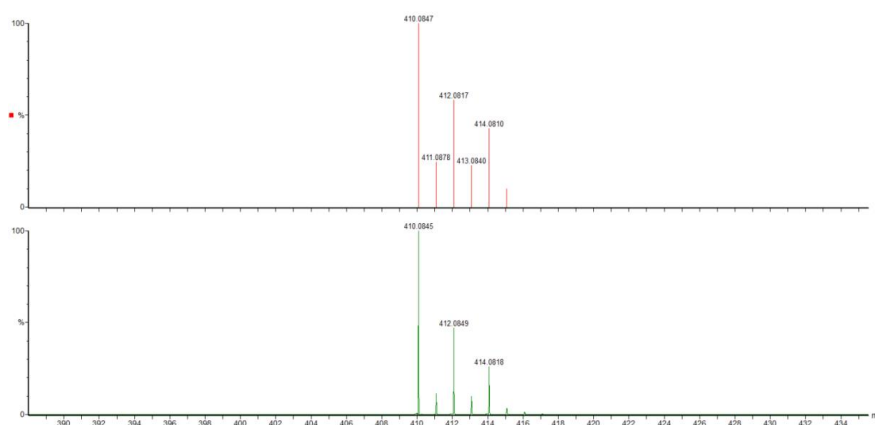

**Figure S36.** Mass spectrometric data (in MeCN) for  $[(\text{Py}2\text{ald})\text{Zn}]_2(\text{BF}_4)_2(\mathbf{5}^{\text{Zn}}(\text{BF}_4)_2)$  obtained from the reaction of  $[(\text{Py}2\text{ald})\text{Zn}(\text{SPh})]$  ( $\mathbf{1a}^{\text{Zn}}$ ) with 1 equiv of  $(\text{Cp}_2\text{Fe})(\text{BF}_4)$ , shows the presence of  $[(\text{Py}2\text{ald})\text{Zn}]^+$  ( $m/z$ : 410.0847, simulated data, orange line; 410.0845, observed data, green line).

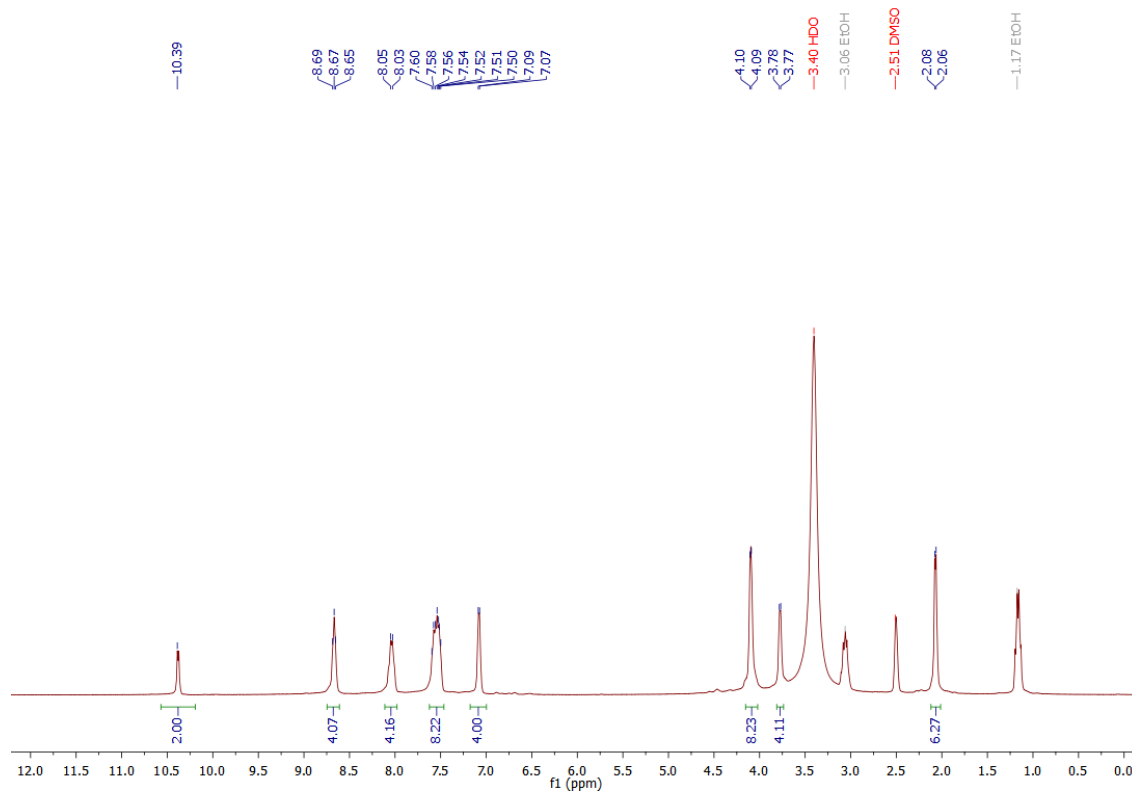

**Figure S37.**  $^1\text{H}$  NMR (300 MHz,  $\text{DMSO-d}_6$ ) spectrum of  $[(\text{Py}2\text{ald})\text{Zn}]_2(\text{BF}_4)_2$  ( $5^{\text{Zn}}(\text{BF}_4)_2$ ) obtained from the reaction  $[(\text{Py}2\text{ald})\text{Zn}(\text{SPh})]$  ( $1\text{a}^{\text{Zn}}$ ) with 1 equiv of  $(\text{Cp}_2\text{Fe})(\text{BF}_4)$ .

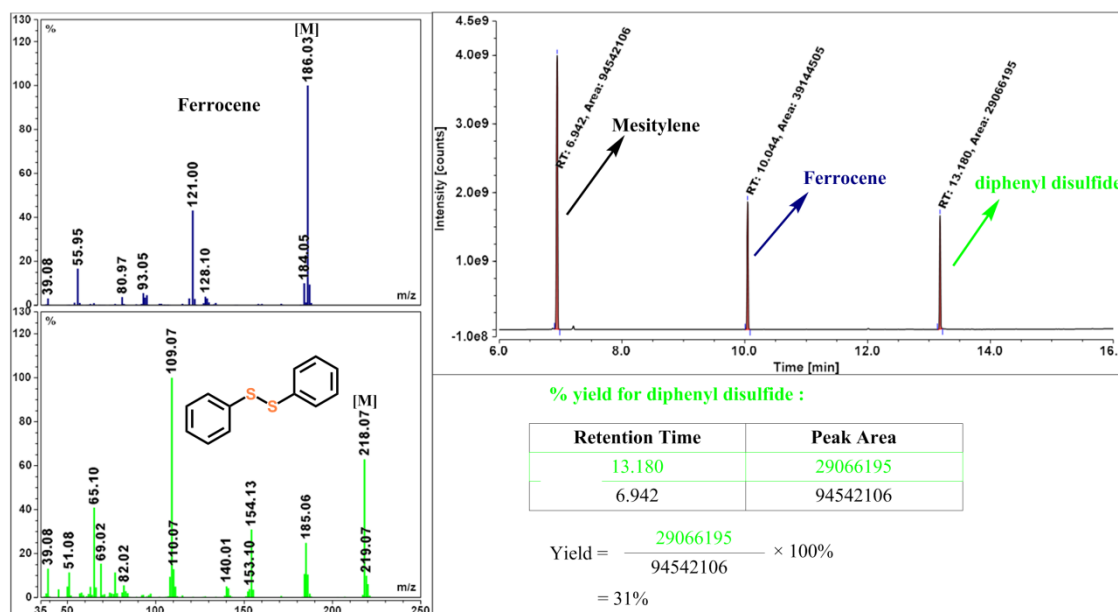

**Figure S38.** GC-MS data for the identification and yield (31%) calculation of diphenyl disulfide produced in the reaction of  $[(\text{Py}2\text{ald})\text{Zn}(\text{SPh})]$  ( $1\text{a}^{\text{Zn}}$ ) with 1 equiv of  $(\text{Cp}_2\text{Fe})(\text{BF}_4)$ .



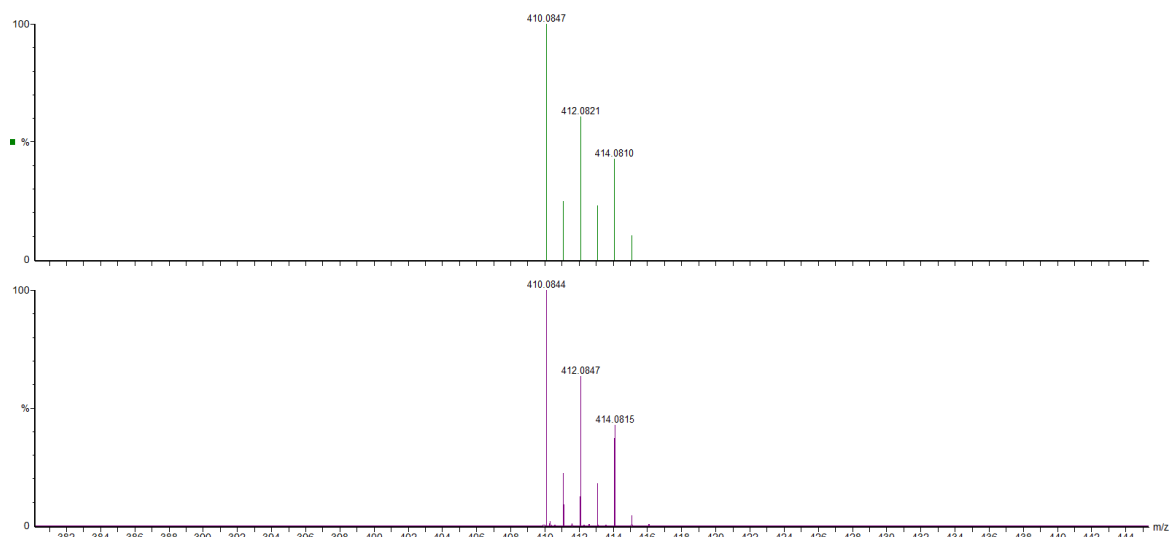

**Figure S39.** Mass spectrometric data (in MeCN) for  $[(\text{Py}2\text{ald})\text{Zn}]_2(\text{BF}_4)_2$  ( $5^{\text{Zn}}(\text{BF}_4)_2$ ) obtained from the reaction of  $[(\text{Py}2\text{ald})\text{Zn}(\text{ONO})]$  ( $3^{\text{Zn}}$ ) with 1 equiv of PhSH shows the presence of  $[(\text{Py}2\text{ald})\text{Zn}]^+$  (m/z: 410.0847, simulated data, green line; 410.0844, observed data, purple line).

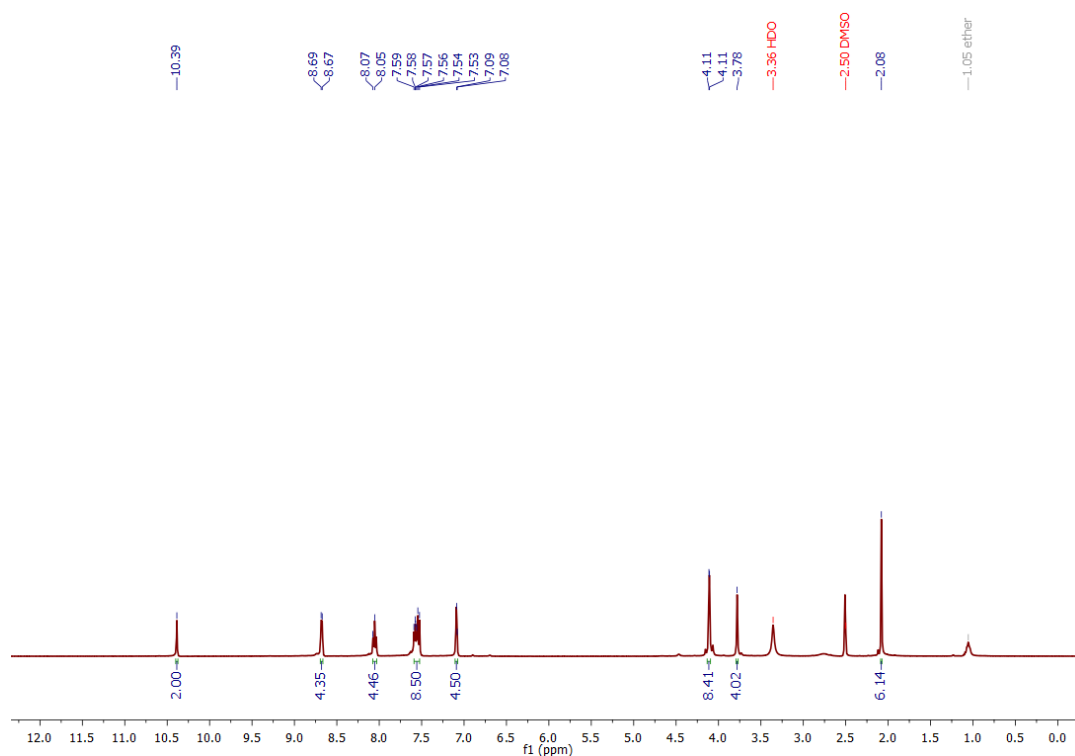

**Figure S40.**  $^1\text{H}$  NMR (400 MHz,  $\text{DMSO-d}_6$ ) spectrum of  $[(\text{Py}2\text{ald})\text{Zn}]_2(\text{BF}_4)_2$  ( $5^{\text{Zn}}(\text{BF}_4)_2$ ) obtained from the reaction of  $[(\text{Py}2\text{ald})\text{Zn}(\text{ONO})]$  ( $3^{\text{Zn}}$ ) with 1 equiv of PhSH.

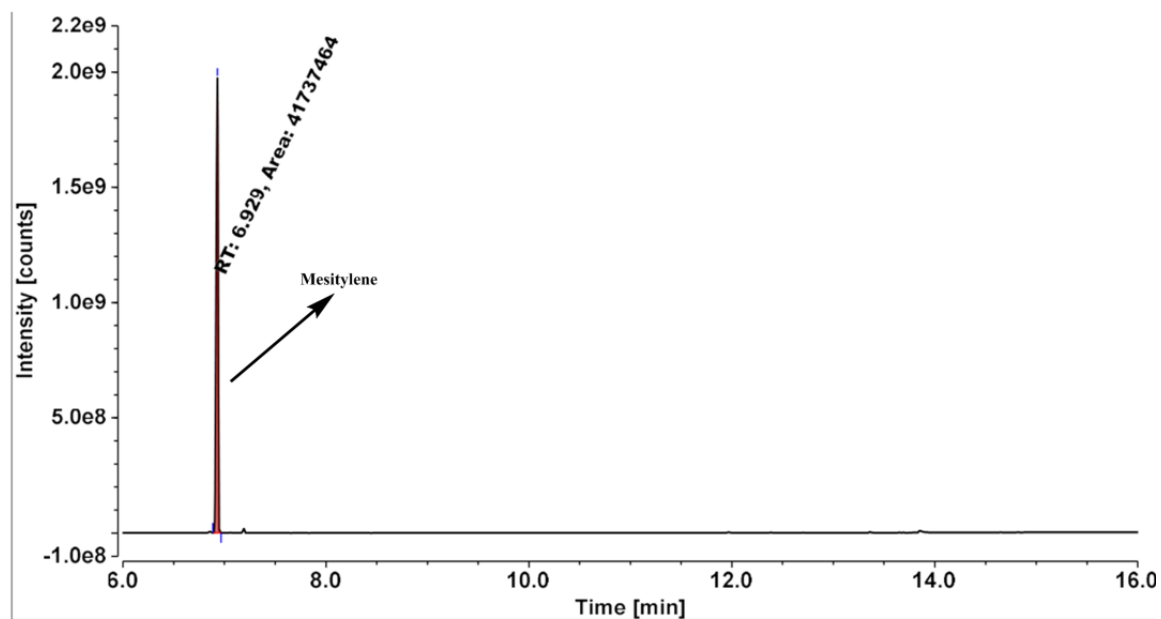

**Figure S41.** GC-MS data shows that no diphenyldisulfide was generated in the reaction of [(Py2ald)Zn(ONO)] ( $3^{Zn}$ ) with 1 equiv of NaSPh.

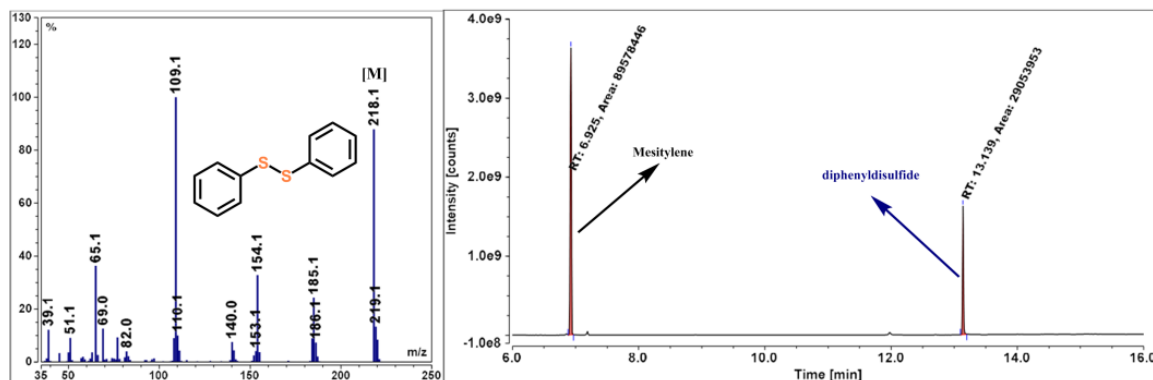

**% yield for diphenyldisulfide :**

| Retention Time | Peak Area |
|----------------|-----------|
| 13.139         | 29053953  |
| 6.925          | 89578446  |

$$\text{Yield} = \frac{29053953}{89578446} \times 100\% = 32\%$$

**Figure S42.** GC-MS data for the identification and yield (32%) calculation of diphenyldisulfide produced in the reaction of [(Py2ald)Zn(ONO)] ( $3^{Zn}$ ) with 1 equiv of PhSH.

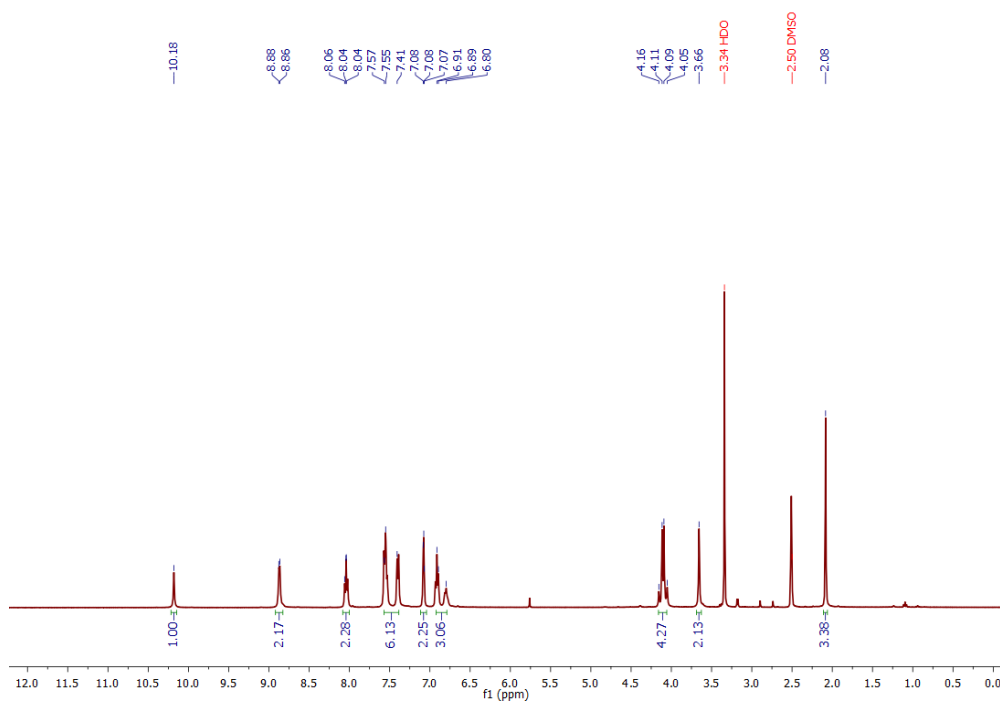

**Figure S43.**  $^1\text{H}$  NMR (400 MHz,  $\text{DMSO-d}_6$ ) spectrum of  $[(\text{Py}2\text{ald})\text{Zn}(\text{SPh})]$  ( $1\text{a}^{\text{Zn}}$ ) obtained from the reaction of  $[(\text{Py}2\text{ald})\text{Zn}(\text{ONO})]$  ( $3^{\text{Zn}}$ ) with 2 equiv of PhSH.

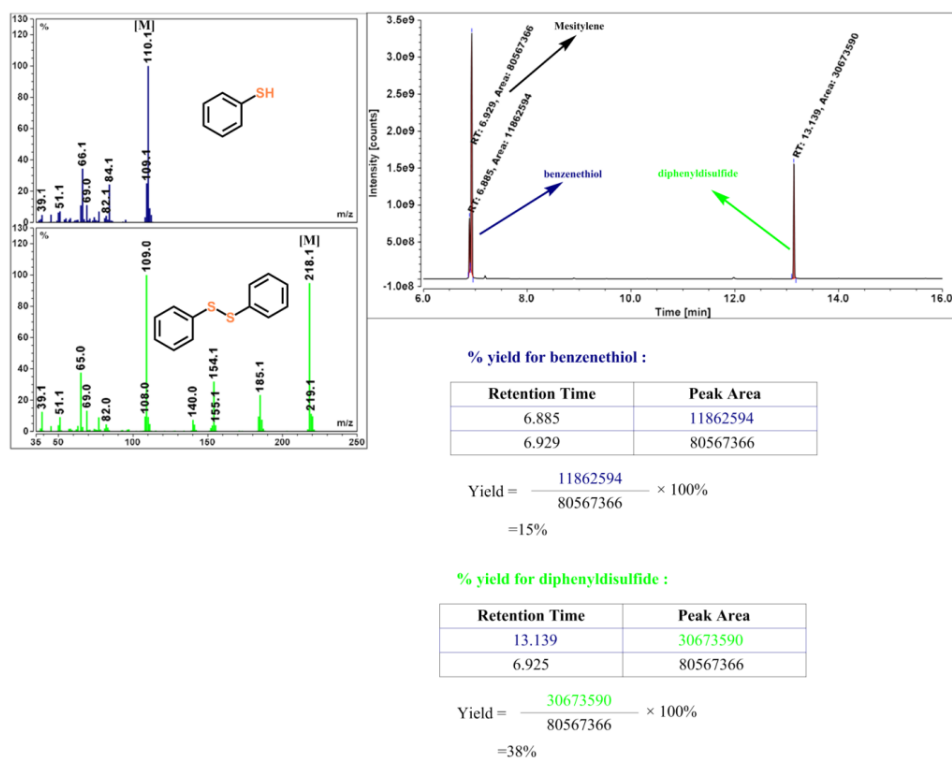

**Figure S44.** GC-MS data for the identification and yield (38%) calculation of diphenyldisulfide produced in the reaction of  $[(\text{Py}2\text{ald})\text{Zn}(\text{ONO})]$  ( $3^{\text{Zn}}$ ) with 2 equiv of PhSH.

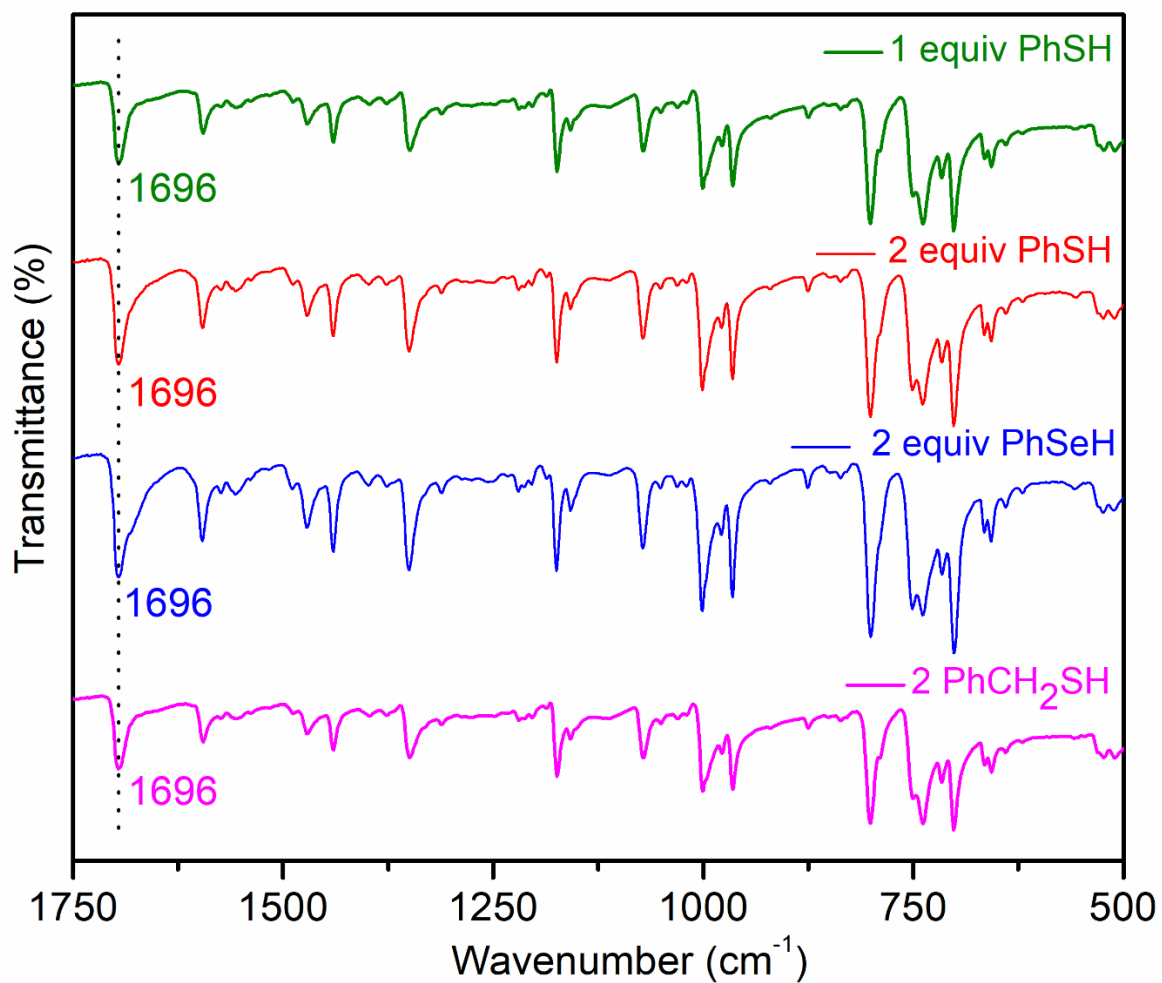

**Figure S45.** IR spectra of [(TPP)Co(NO)] ( $\nu_{\text{NO}} = 1696 \text{ cm}^{-1}$ ) generated by the trapping of NO gas (generated by the reaction of [(Py2ald)Zn(ONO)] ( $3^{\text{Zn}}$ ) with PhSH, PhCH<sub>2</sub>SH and PhSeH) by (TPP)Co<sup>II</sup>.

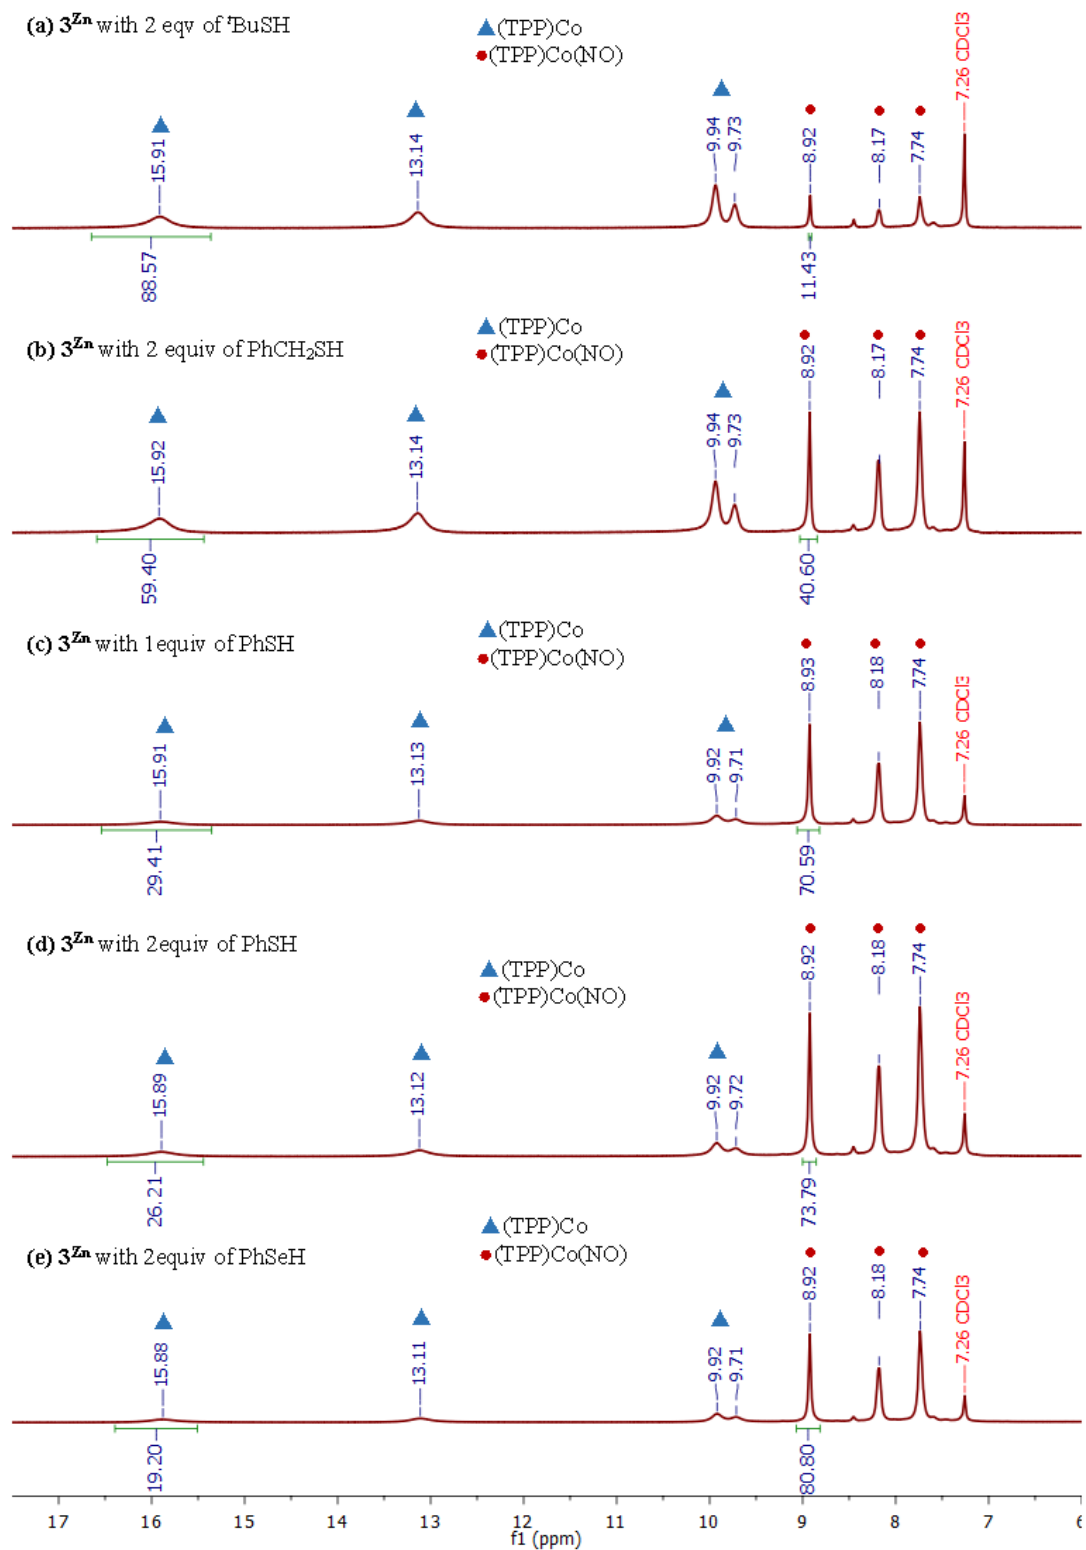

**Figure S46.**  $^1\text{H}$  NMR (400 MHz,  $\text{CDCl}_3$ ) spectra of  $(\text{TPP})\text{Co}^{\text{II}}$  after trapping the NO gas generated by the reaction of  $[\text{Py}2\text{ald}]\text{Zn}(\text{ONO})$  ( $3^{\text{Zn}}$ ) with (a)  $^t\text{BuSH}$  (2 equiv), (b)  $\text{PhCH}_2\text{SH}$  (2 equiv), (c)  $\text{PhSH}$  (1 equiv), (d)  $\text{PhSH}$  (2 equiv) and (e)  $\text{PhSeH}$  (2 equiv).

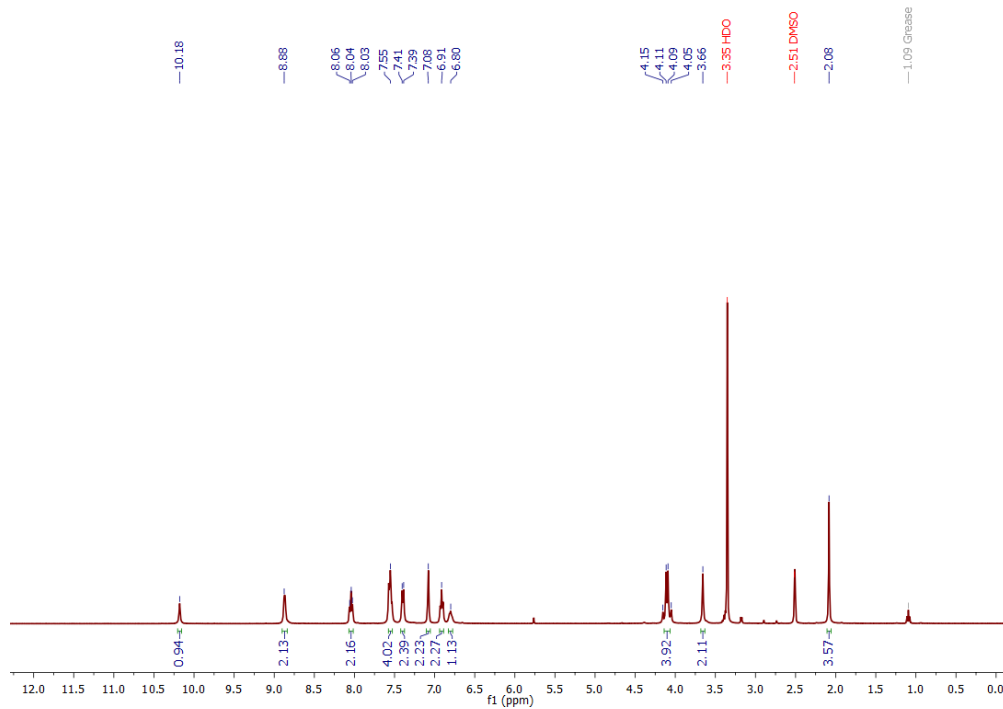

**Figure S47.**  $^1\text{H}$  NMR (400 MHz,  $\text{DMSO-d}_6$ ) spectrum of  $[(\text{Py}2\text{ald})\text{Zn}(\text{SePh})]$  ( $2^{\text{Zn}}$ ) obtained from the reaction of  $[(\text{Py}2\text{ald})\text{Zn}(\text{ONO})]$  ( $3^{\text{Zn}}$ ) with 2 equiv of  $\text{PhSeH}$ .

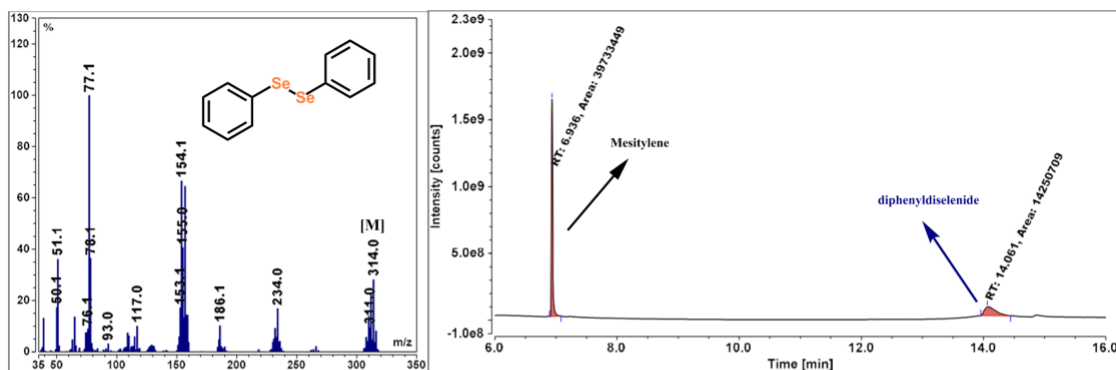

**% yield for diphenyldiselenide:**

| Retention Time | Peak Area |
|----------------|-----------|
| 14.061         | 14250709  |
| 6.936          | 39733449  |

$$\text{Yield} = \frac{14250709}{39733449} \times 100\% = 35\%$$

**Figure S48.** Gas chromatographic data for the identification and yield calculation (35%) of diphenyldiselenide produced in the reaction of  $[(\text{Py}2\text{ald})\text{Zn}(\text{ONO})]$  ( $3^{\text{Zn}}$ ) with 2 equiv of  $\text{PhSeH}$ .

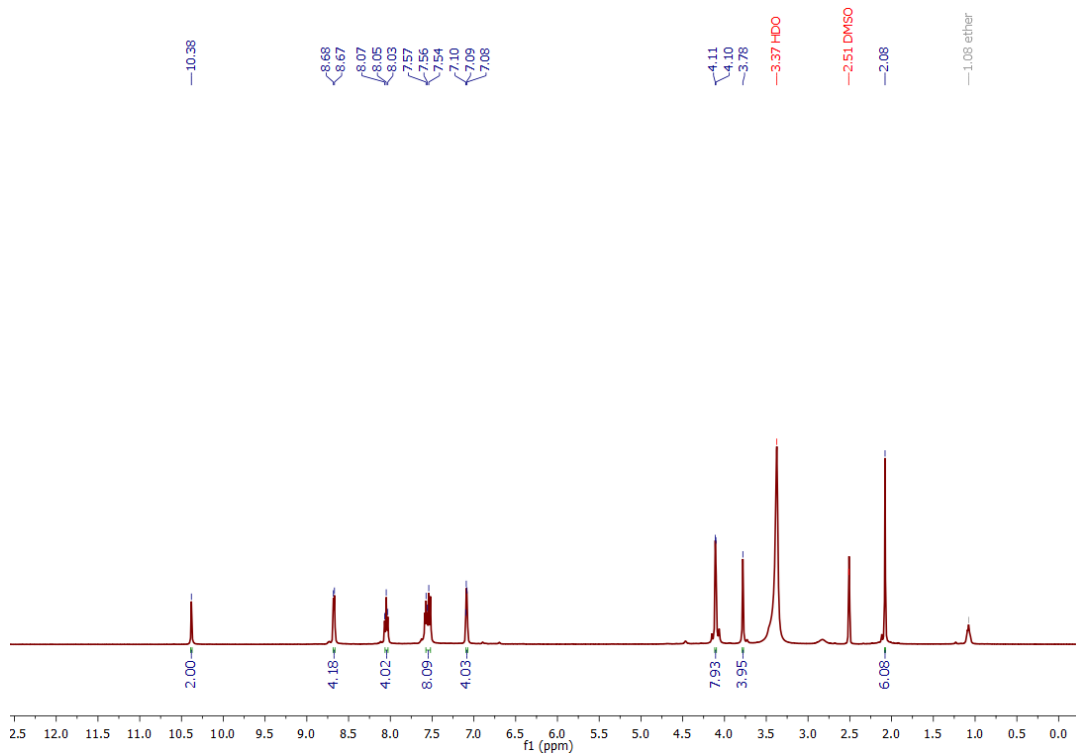

**Figure S49.**  $^1\text{H}$  NMR (400 MHz,  $\text{DMSO-d}_6$ ) spectrum of  $[(\text{Py}2\text{ald})\text{Zn}]_2((\text{BF}_4)_2)$  ( $5^{\text{Zn}}(\text{BF}_4)_2$ ) obtained from the reaction of  $[(\text{Py}2\text{ald})\text{Zn}(\text{ONO})]$  ( $3^{\text{Zn}}$ ) and 2 equiv of  $\text{PhCH}_2\text{SH}$ .

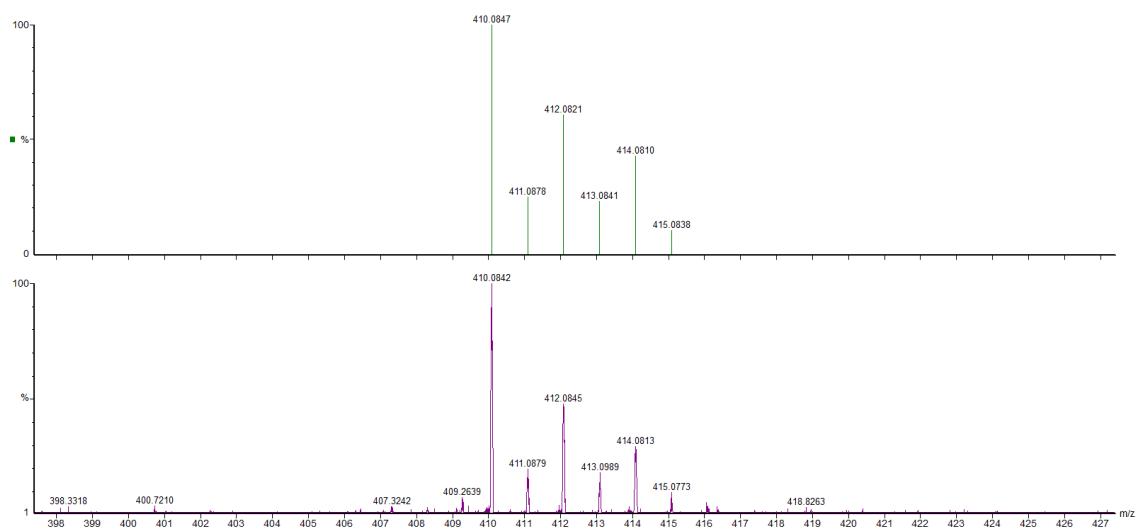

**Figure S50.** Mass spectrometric data (in MeCN) for  $[(\text{Py}2\text{ald})\text{Zn}]_2((\text{BF}_4)_2)$  ( $5^{\text{Zn}}(\text{BF}_4)_2$ ) obtained from the reaction of  $[(\text{Py}2\text{ald})\text{Zn}(\text{ONO})]$  ( $3^{\text{Zn}}$ ) and 2 equiv of  $\text{PhCH}_2\text{SH}$  shows the presence of  $[(\text{Py}2\text{ald})\text{Zn}]^+$  ( $m/z$ : 410.0847, simulated data, green line; 410.0842, observed data, purple line).

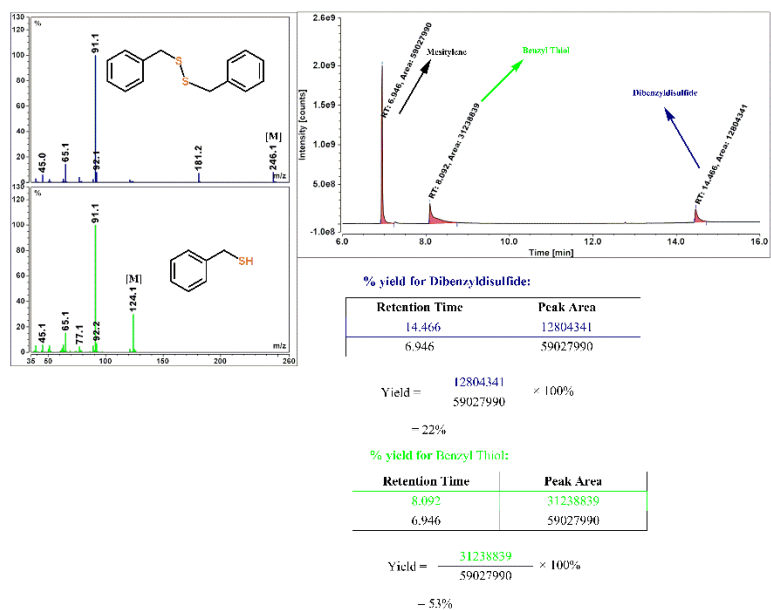

**Figure S51.** Gas chromatographic data for the identification and yield calculation of dibenzyl disulfide produced in the reaction of [(Py2ald)Zn(ONO)] ( $3^{Zn}$ ) with 2 equiv of PhCH<sub>2</sub>SH. Yields: 32% (PhCH<sub>2</sub>S-SCH<sub>2</sub>Ph), 53% (unreacted PhCH<sub>2</sub>SH).

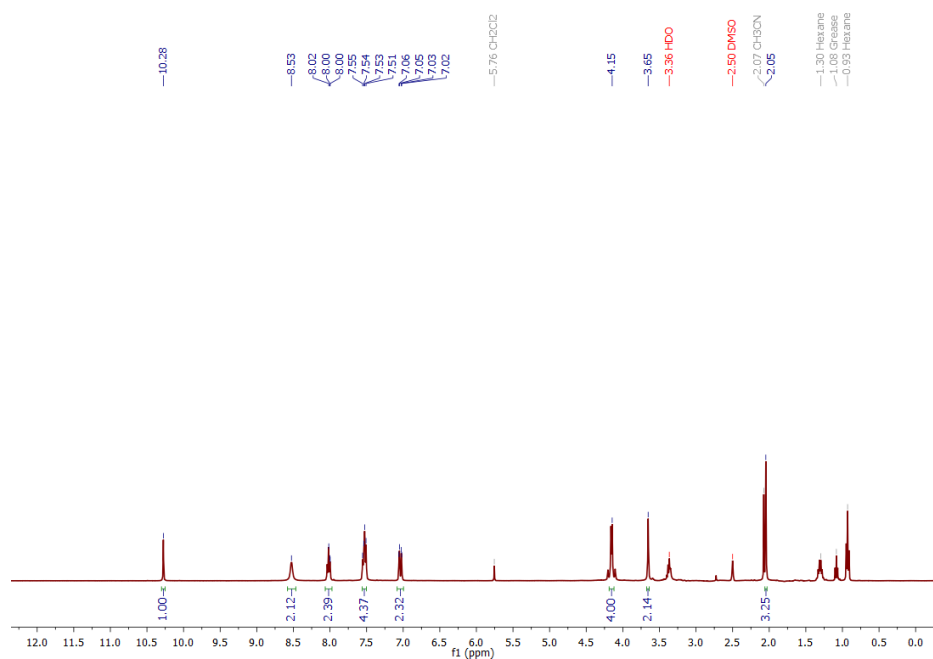

**Figure S52.** <sup>1</sup>H NMR (400 MHz, DMSO-d<sub>6</sub>) spectrum of the unreacted [(Py2ald)Zn(ONO)] ( $3^{Zn}$ ) obtained from the reaction of  $3^{Zn}$  with 2 equiv of <sup>t</sup>BuSH. Note that the yield of NO in this reaction was only 9% .



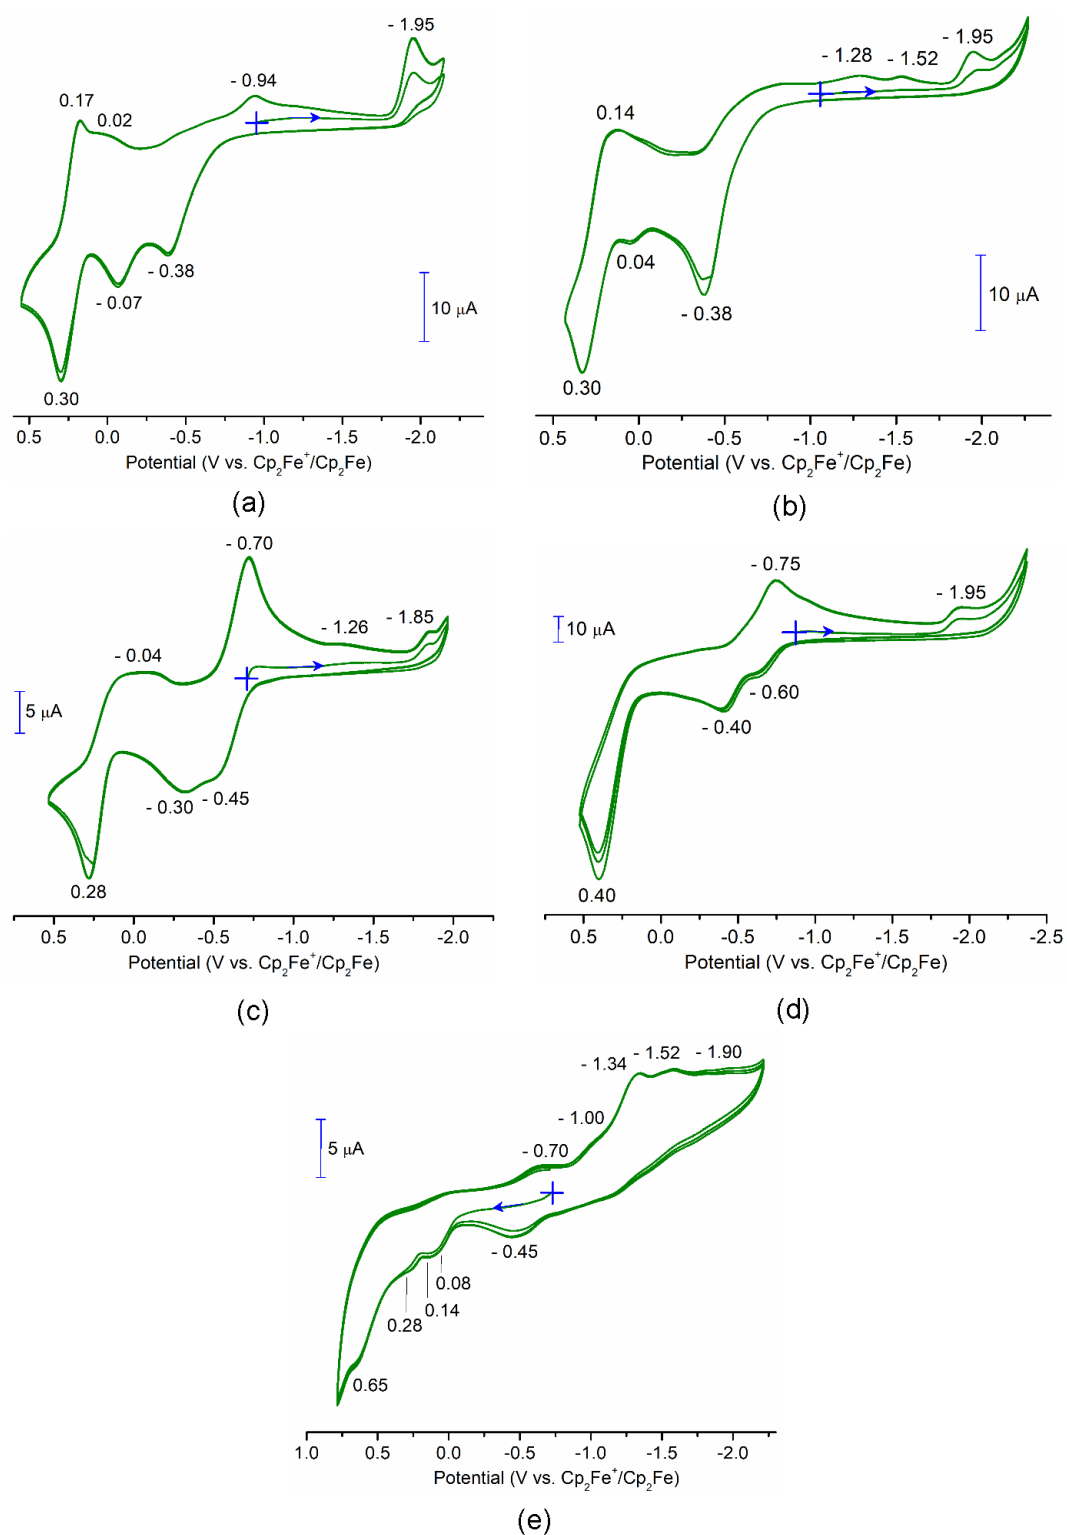

**Figure S53.** Cyclic voltammograms of  $1a^{Fe}$  (a)  $1b^{Fe}$  (b),  $2^{Fe}$  (c),  $5^{Fe}$  (d), and  $8^{Fe}$  (e) in  $CH_2Cl_2$  (multiple scans, scan rate = 100 mV/scan). See Figure S54 for the cyclic voltammograms of Zn(II) complexes which helped to identify the redox events related with the  $Py_2ald^{1-}$  ligand.

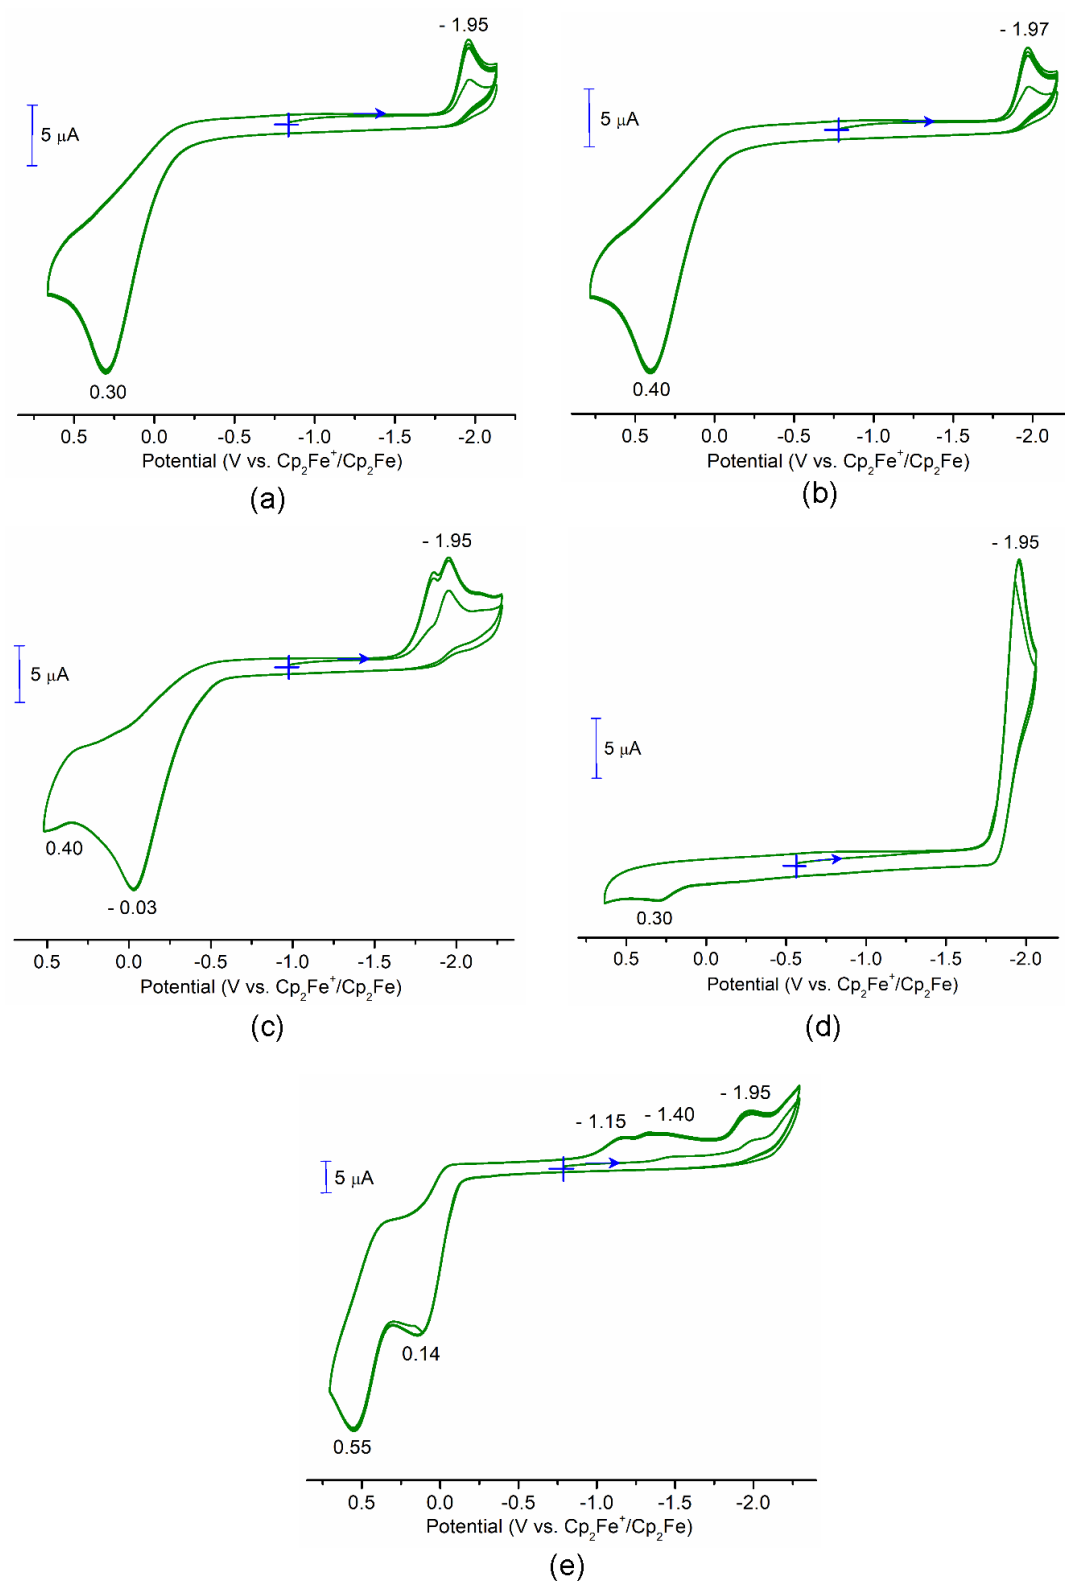

**Figure S54.** Cyclic voltammograms of **1a<sup>Zn</sup>** (a) **1b<sup>Zn</sup>** (b), **2<sup>Zn</sup>** (c), **5<sup>Zn</sup>** (d), and **3<sup>Zn</sup>** (e) in CH<sub>2</sub>Cl<sub>2</sub> (multiple scans, scan rate = 100 mV/scan).

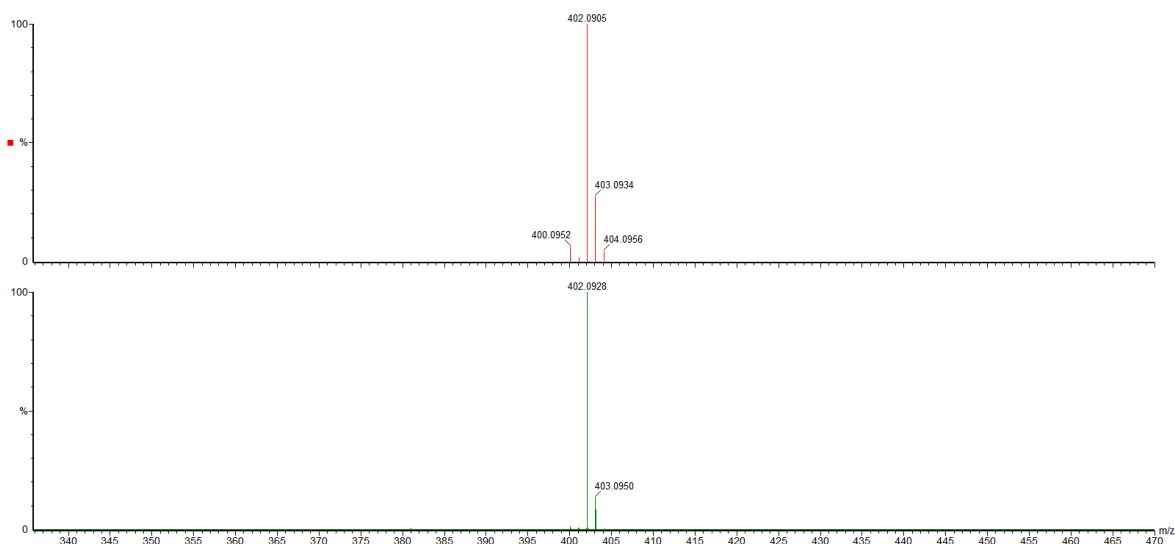

**Figure S55.** Mass spectrometric data (in MeCN) for  $[(\text{Py}2\text{ald})\text{Fe}]_2(\text{BPh}_4)_2$  ( $5^{\text{Fe}}(\text{BPh}_4)_2$ ) obtained from the reaction between  $[(\text{Py}2\text{ald})\text{Fe}(\text{SPh})]$  ( $1\text{a}^{\text{Fe}}$ ) with 1 equiv of  $(\text{Cp}_2\text{Fe})(\text{BF}_4)$  in the presence of  $\text{NaBPh}_4$ , shows the presence of  $[(\text{Py}2\text{ald})\text{Fe}]^+$  ( $m/z$ : 402.0905, simulated data, orange line; 402.0928, observed data, green line).

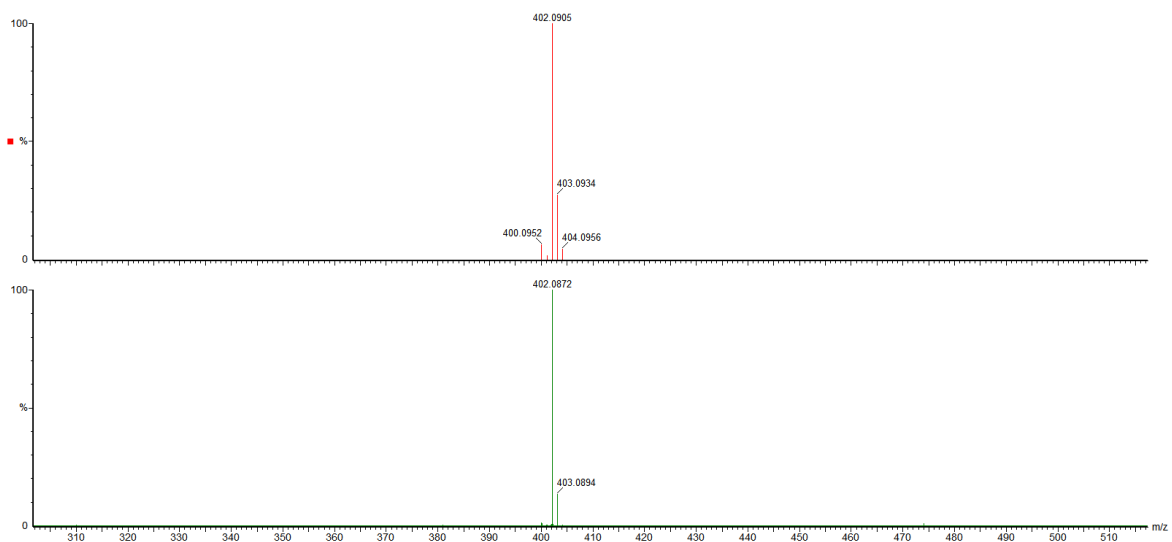

**Figure S56.** Mass spectrometric data (in MeCN) for  $[(\text{Py}2\text{ald})\text{Fe}]_2(\text{BPh}_4)_2$  ( $5^{\text{Fe}}(\text{BPh}_4)_2$ ) obtained from the reaction between  $[(\text{Py}2\text{ald})\text{Fe}(\text{SePh})]$  ( $2^{\text{Fe}}$ ) with 1 equiv of  $(\text{Cp}_2\text{Fe})(\text{BF}_4)$  in the presence of  $\text{NaBPh}_4$ , shows the presence of  $[(\text{Py}2\text{ald})\text{Fe}]^+$  ( $m/z$ : 402.0905, simulated data, orange line; 402.0872, observed data, green line).

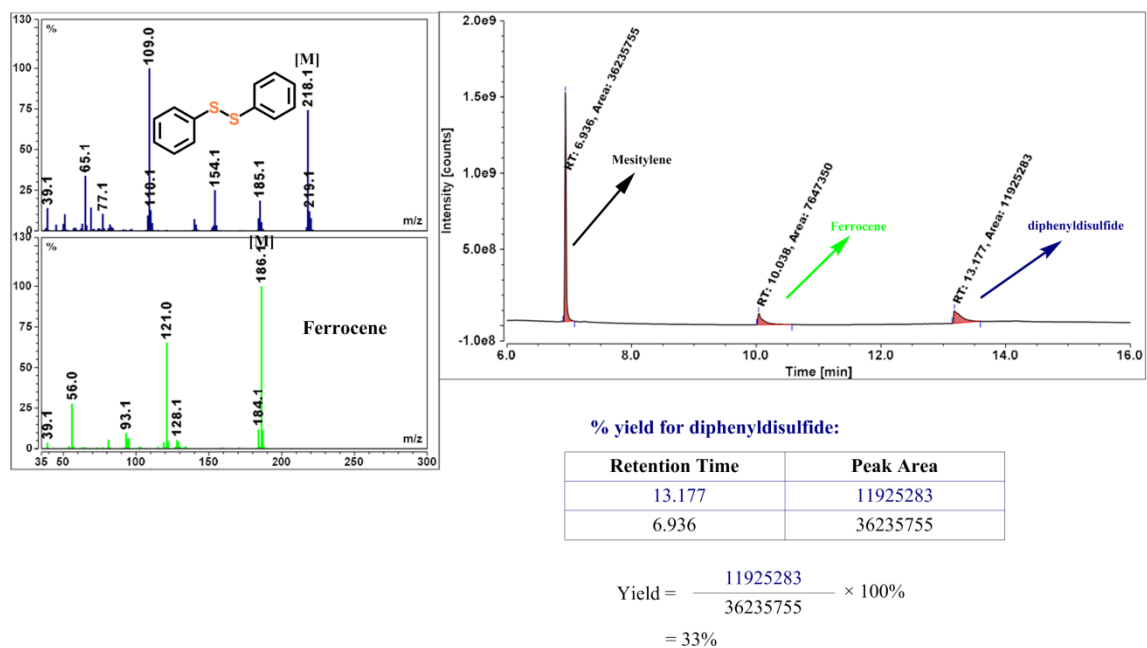

**Figure S57.** GC-MS data for the identification and yield (33%) calculation of diphenyl disulfide produced in the reaction of [(Py2ald)Fe(SPh)] (**1a<sup>Fe</sup>**) with 1 equiv of (Cp<sub>2</sub>Fe)(BF<sub>4</sub>) in the presence of NaBPh<sub>4</sub>.

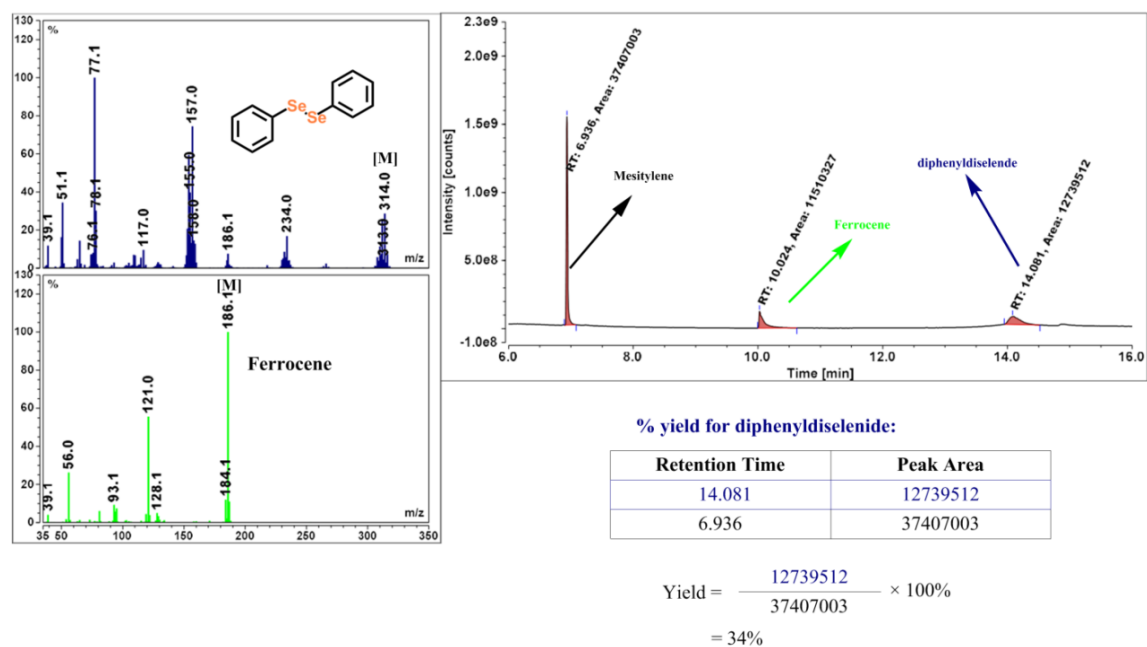

**Figure S58.** GC-MS data for the identification and yield (34%) calculation of diphenyl diselenide produced in the reaction of [(Py2ald)Fe(SePh)] (**2<sup>Fe</sup>**) with 1 equiv of (Cp<sub>2</sub>Fe)(BF<sub>4</sub>) in the presence of NaBPh<sub>4</sub>.

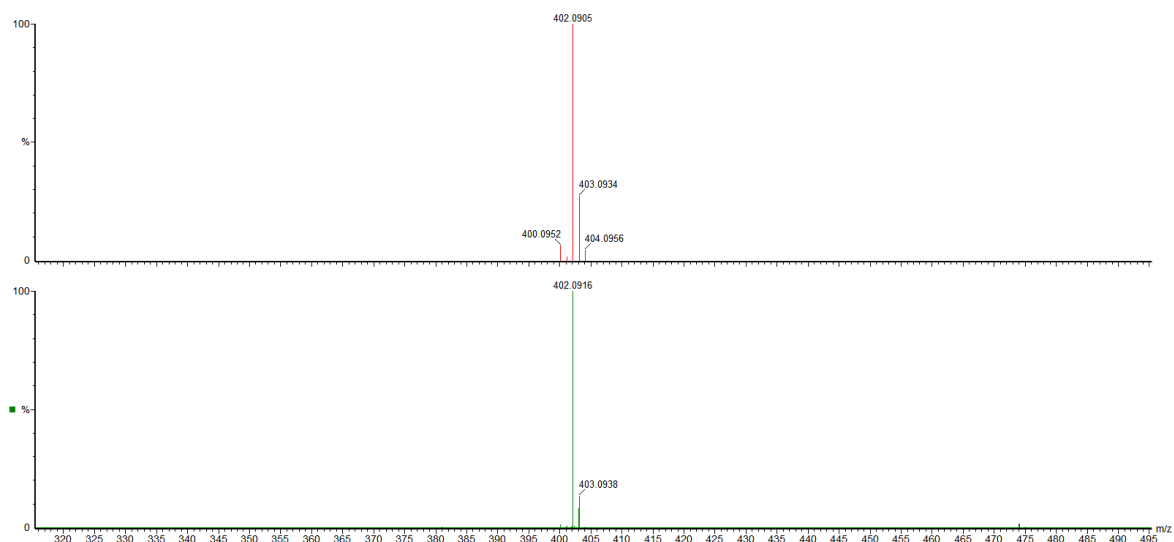

**Figure S59.** Mass spectrometric data (in MeCN) for  $[(\text{Py}2\text{ald})\text{Fe}]_2(\text{BPh}_4)_2$  ( $5^{\text{Fe}}(\text{BPh}_4)_2$ ) obtained from the reaction of  $[(\text{Py}2\text{ald})\text{Fe}(\text{S}-\text{C}_6\text{H}_4-2,6-\text{Me}_2)]$  ( $1^{\text{bFe}}$ ) with 1 equiv of  $(\text{Cp}_2\text{Fe})(\text{BF}_4)$  in the presence of  $\text{NaBPh}_4$ , shows the presence of  $[(\text{Py}2\text{ald})\text{Fe}]^+$  ( $m/z$ : 402.0905, simulated data, orange line; 402.0916, observed data, green line).

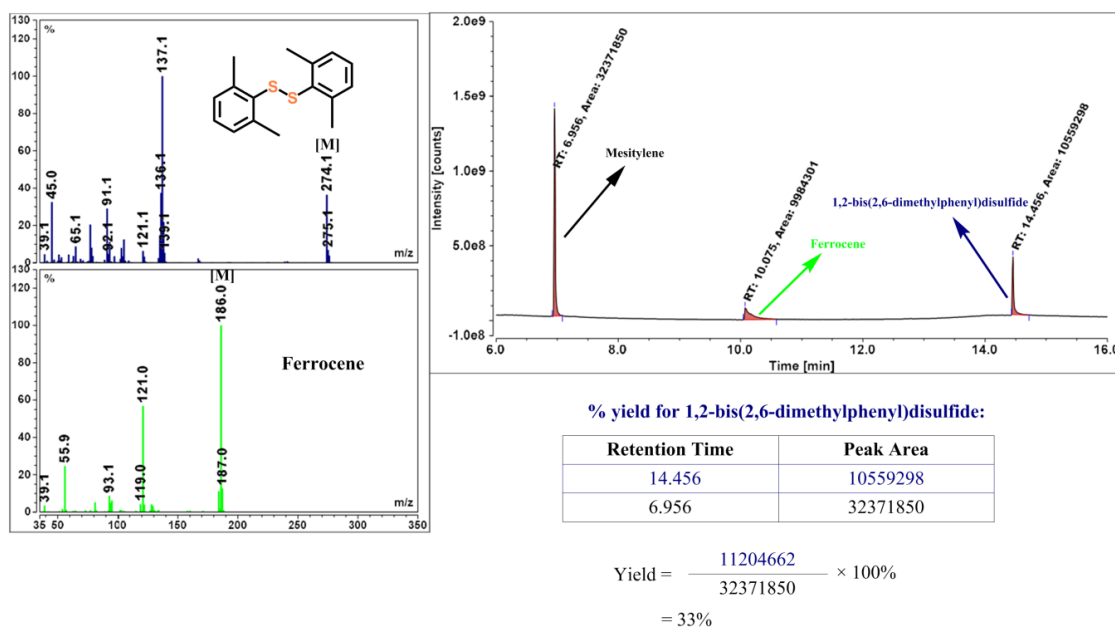

**Figure S60.** GC-MS data for the identification and yield (33%) calculation of 1, 2-bis(2,6-dimethylphenyl)disulfide produced in the reaction of  $[(\text{Py}2\text{ald})\text{Fe}(\text{S}-\text{C}_6\text{H}_4-2,6-\text{Me}_2)]$  ( $1^{\text{bFe}}$ ) with 1 equiv of  $(\text{Cp}_2\text{Fe})(\text{BF}_4)$  in the presence of  $\text{NaBPh}_4$ .

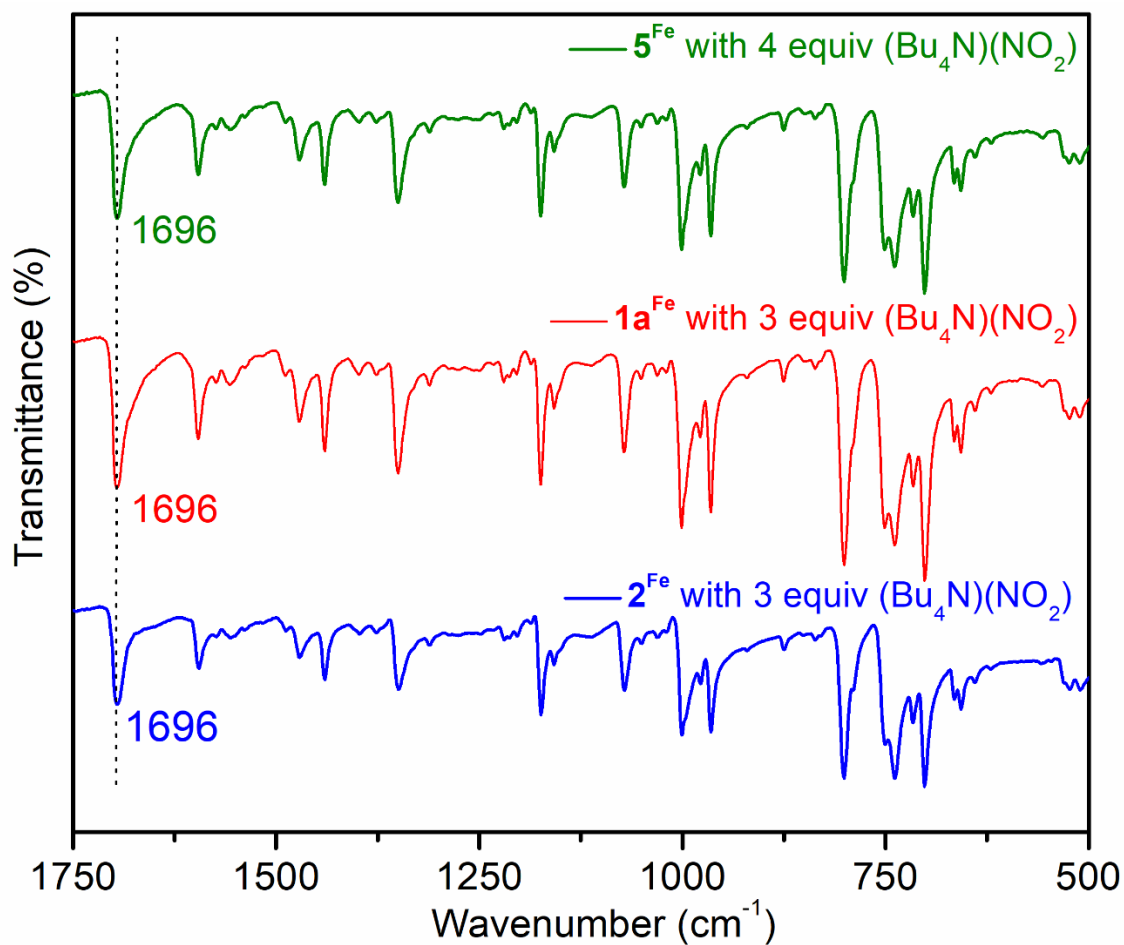

**Figure S61.** IR spectra of [(TPP)Co(NO)] ( $\nu_{\text{NO}} = 1696 \text{ cm}^{-1}$ ) obtained by the trapping of NO gas which was generated by the reaction of [(Py2ald)Fe]<sub>2</sub>(BF<sub>4</sub>)<sub>2</sub> (**5**<sup>Fe</sup>(BF<sub>4</sub>)<sub>2</sub>) and [(Py2ald)Fe(EPh)] (E = S, **1a**<sup>Fe</sup>, E = Se, **2**<sup>Fe</sup>) with 4 and 3 equiv of (Bu<sub>4</sub>N)(NO<sub>2</sub>), respectively.

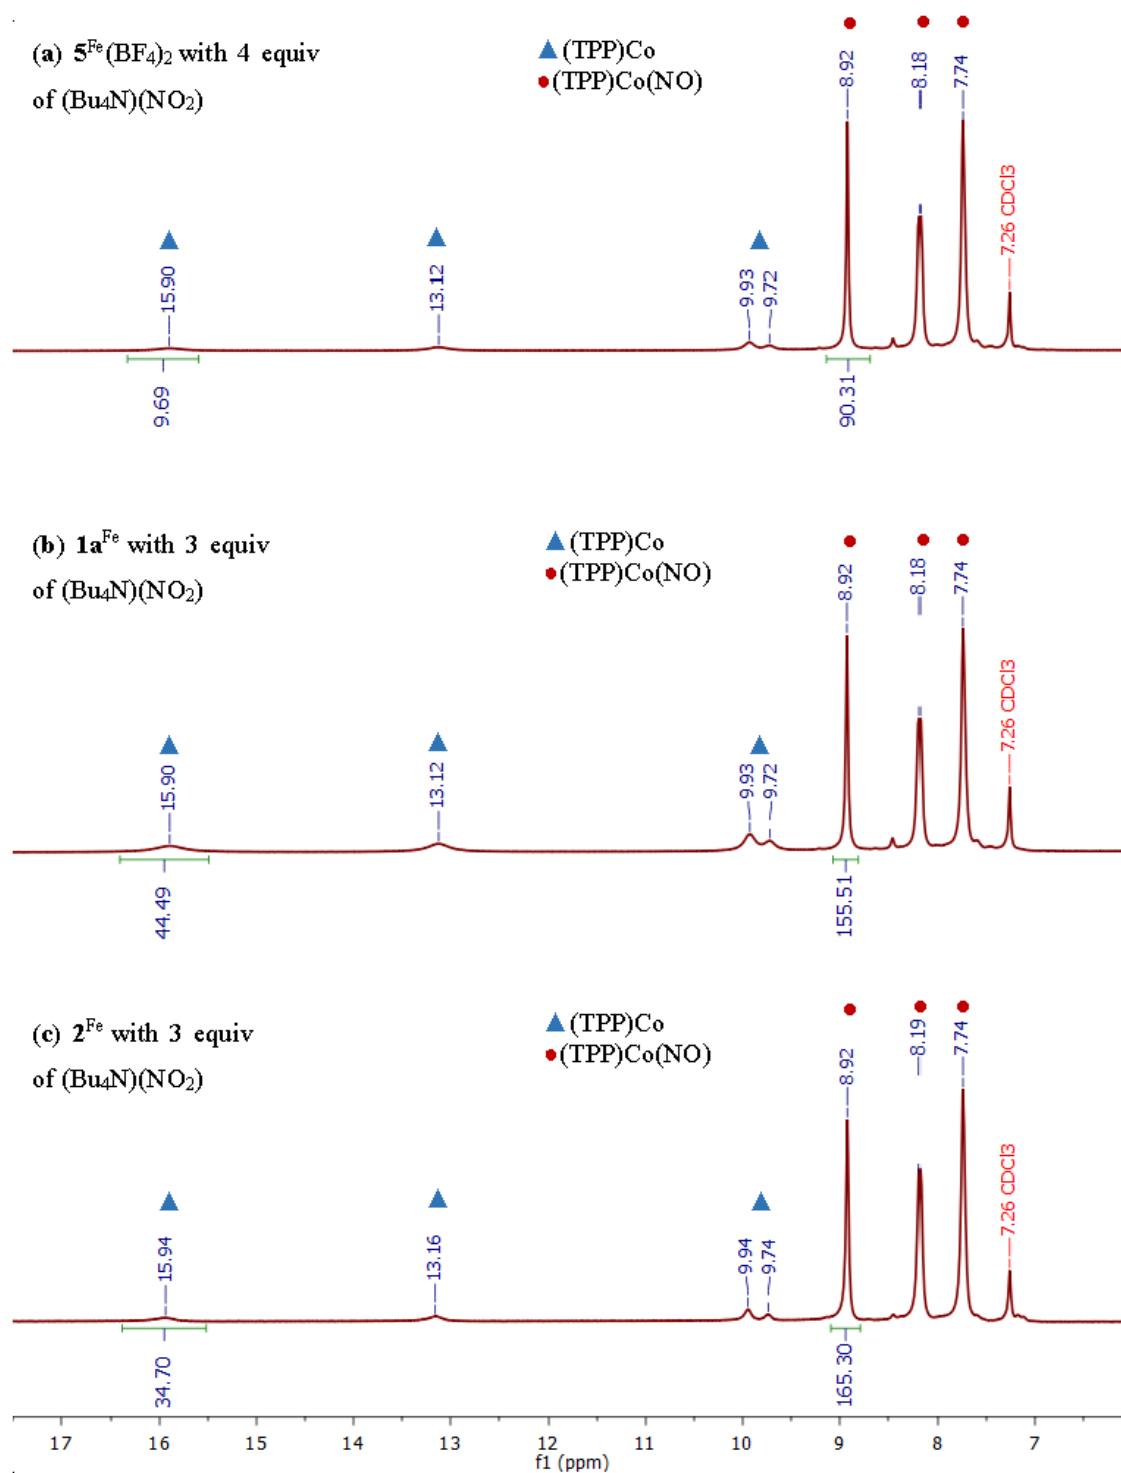

**Figure S62.**  $^1\text{H}$  NMR (400 MHz,  $\text{CDCl}_3$ ) spectra of  $(\text{TPP})\text{Co}^{\text{II}}$  after trapping the NO gas which was generated by the reaction of  $[(\text{Py}2\text{ald})\text{Fe}]_2(\text{BF}_4)_2$  ( $5^{\text{Fe}}(\text{BF}_4)_2$ ) and  $[(\text{Py}2\text{ald})\text{Fe}(\text{EPh})]$  (E = S,  $1\text{a}^{\text{Fe}}$ , E = Se,  $2^{\text{Fe}}$ ) with 4 and 3 equiv of  $(\text{Bu}_4\text{N})(\text{NO}_2)$ , respectively.

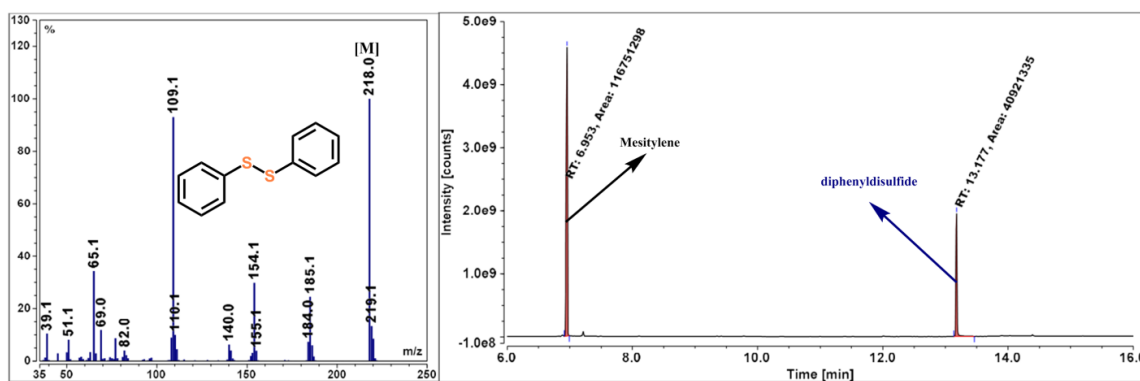

**% yield for diphenyldisulfide :**

| Retention Time | Peak Area |
|----------------|-----------|
| 13.177         | 40921335  |
| 6.953          | 116751298 |

$$\text{Yield} = \frac{40921335}{116751298} \times 100\% = 35\%$$

**Figure S63.** GC-MS data for the identification and yield (35%) calculation of diphenyldisulfide produced in the reaction of [(Py2ald)Fe(SPh)] (**1a<sup>Fe</sup>**) with 3 equiv of (Bu<sub>4</sub>N)(NO<sub>2</sub>).

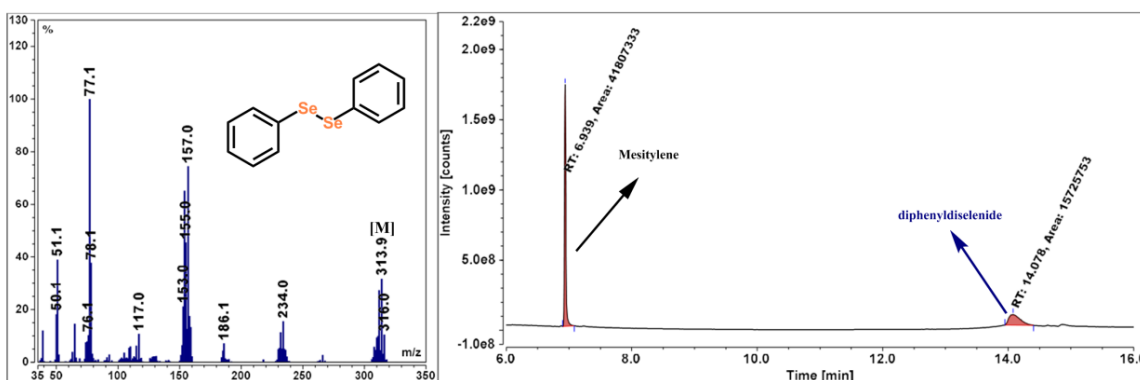

**% yield for diphenyldiselenide:**

| Retention Time | Peak Area |
|----------------|-----------|
| 14.078         | 15725753  |
| 6.939          | 41807333  |

$$\text{Yield} = \frac{15725753}{41807333} \times 100\% = 38\%$$

**Figure S64.** Gas chromatographic data for the identification and yield calculation of diphenyldiselenide (38%) produced in the reaction of [(Py2ald)Fe(SePh)] (**2<sup>Fe</sup>**) with 3 equiv of (Bu<sub>4</sub>N)(NO<sub>2</sub>).



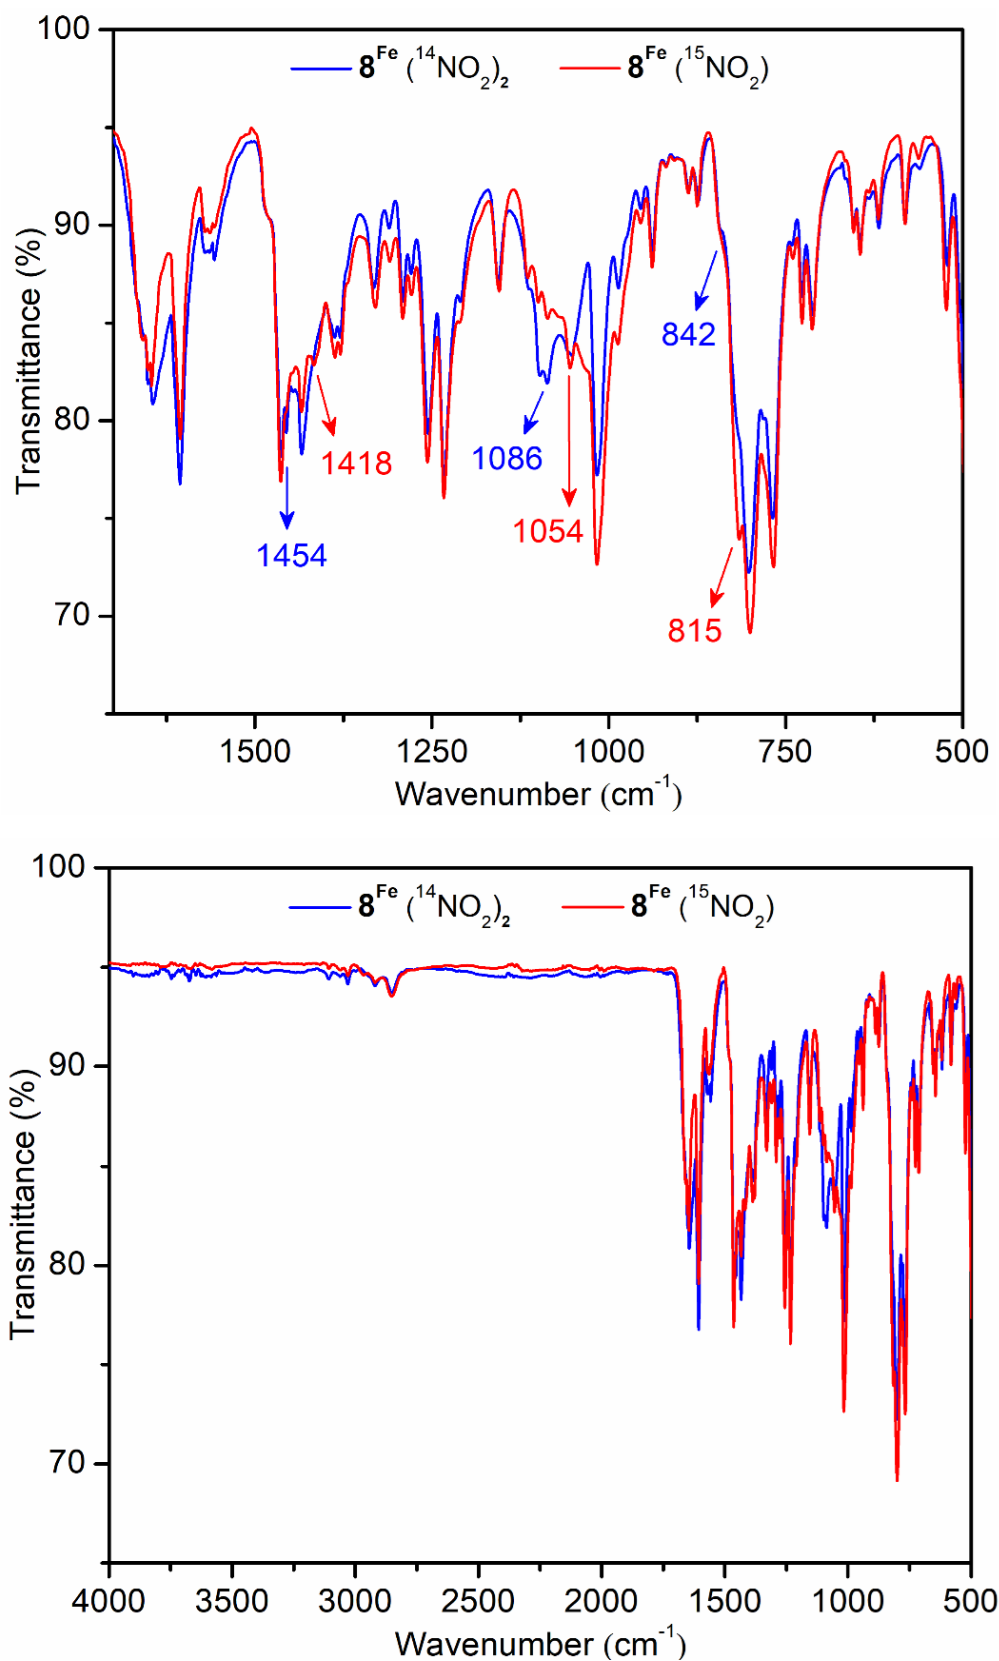

**Figure S65.** IR spectra (ATR) of [ $\{(\text{Py}2\text{ald})(\text{ONO})\text{Fe}\}_2\text{-}\mu_2\text{-O}$ ] ( $\mathbf{8}^{\text{Fe}}$ ) and the corresponding  $^{15}\text{N}$  labelled compound,  $\mathbf{8}^{\text{Fe}}(^{15}\text{NO}_2)$ .

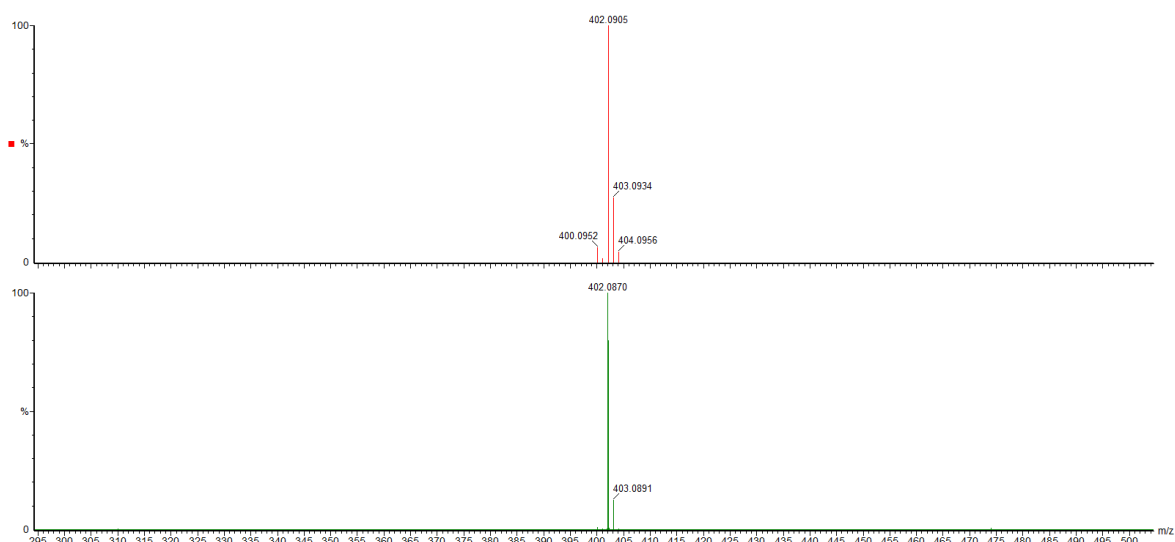

**Figure S66** Mass spectrometric data (in MeCN) for  $[(\text{Py}2\text{ald})\text{Fe}]_2(\text{BF}_4)_2$  ( $5^{\text{Fe}}(\text{BF}_4)_2$ ) obtained from the reaction between  $[\{(\text{Py}2\text{ald})(\text{ONO})\text{Fe}\}_2-\mu_2\text{-O}]$  ( $8^{\text{Fe}}$ ) and 4 equiv of  $\text{Cp}_2\text{Co}$  shows the presence of  $[(\text{Py}2\text{ald})\text{Fe}]^+$  (m/z: 402.0905, simulated data, orange line; 402.0870, observed data, green line).

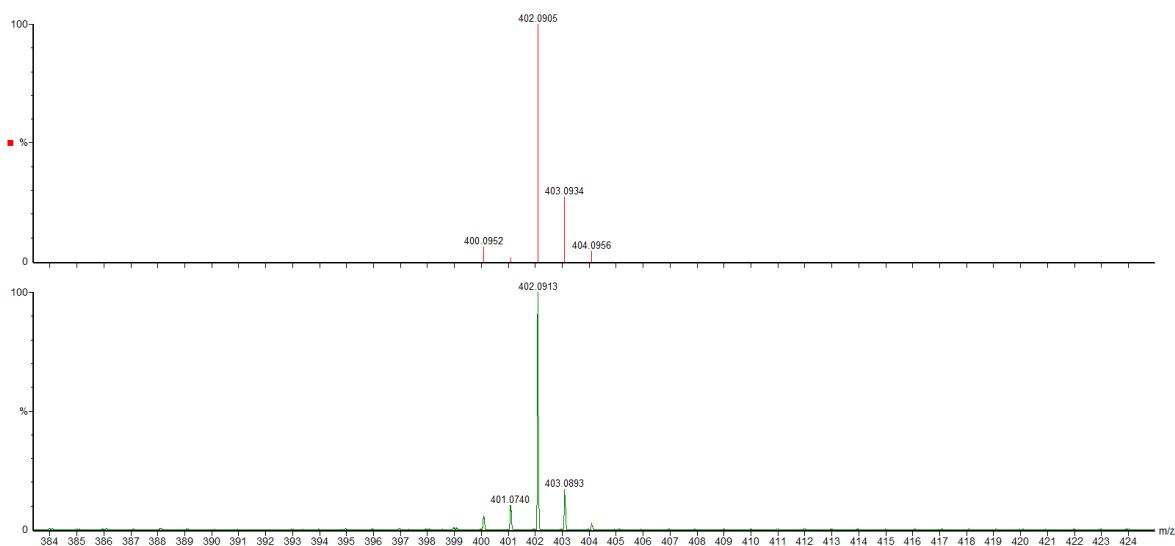

**Figure S67.** Mass spectrometric data (in MeCN) for  $[(\text{Py}2\text{ald})\text{Fe}]_2(\text{BF}_4)_2$  ( $5^{\text{Fe}}(\text{BPh}_4)_2$ ) obtained from the reaction between  $[\{(\text{Py}2\text{ald})(\text{ONO})\text{Fe}\}_2-\mu_2\text{-O}]$  ( $8^{\text{Fe}}$ ) with 4 equiv of  $\text{PhSH}$  (in the presence of 2 equiv of  $\text{NaBPh}_4$ ) shows the presence of  $[(\text{Py}2\text{ald})\text{Fe}]^+$  (m/z: 402.0905, simulated data, orange line; 402.0913, observed data, green line).

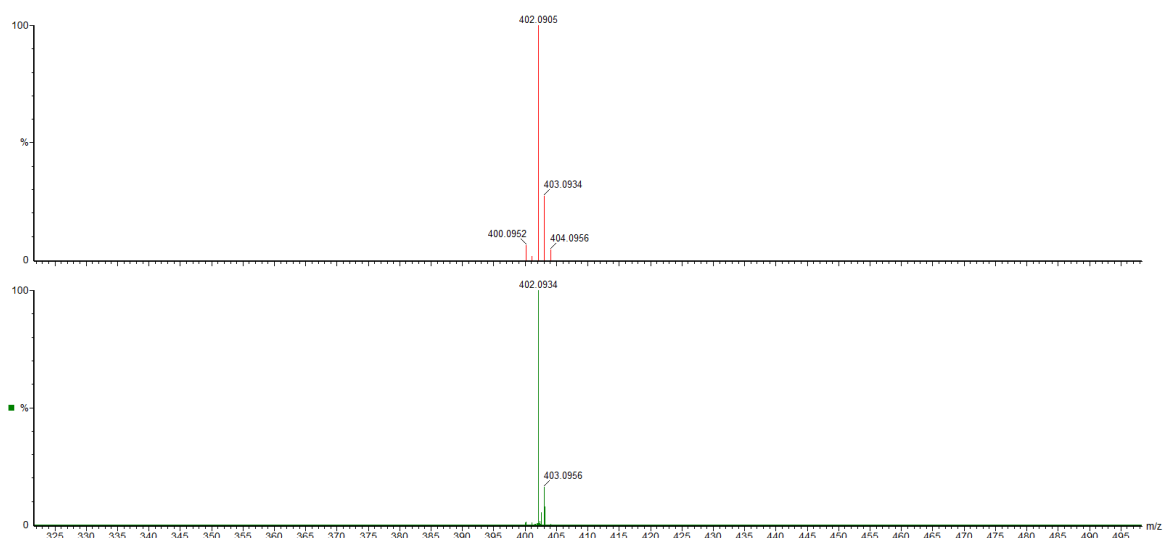

**Figure S68.** Mass spectrometric data (in MeCN) for  $[(\text{Py2ald})\text{Fe}]_2(\text{BF}_4)_2$  ( $5^{\text{Fe}}(\text{BPh}_4)_2$ ) obtained from the reaction between  $[\{(\text{Py2ald})(\text{ONO})\text{Fe}\}_2-\mu_2\text{-O}]$  ( $8^{\text{Fe}}$ ) with 4 equiv of PhSeH (in the presence of 2 equiv of NaBPh<sub>4</sub>) shows the presence of  $[(\text{Py2ald})\text{Fe}]^+$  ( $m/z$ :402.0905, simulated data, orange line; 402.0934, observed data, green line).

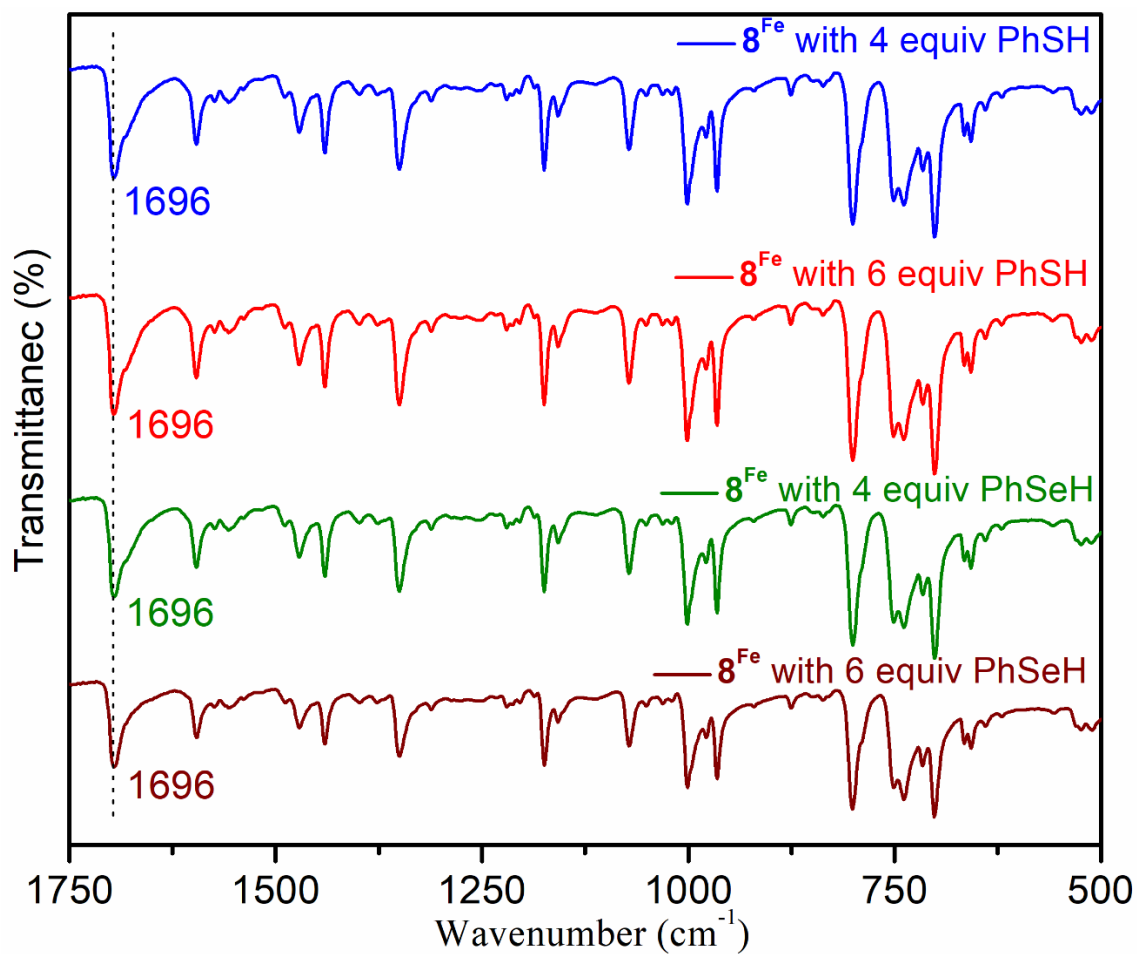

**Figure S69.** IR spectra of [(TPP)Co(NO)] ( $\nu_{\text{NO}} = 1696 \text{ cm}^{-1}$ ) obtained by the trapping of NO gas which was generated by the reaction of [ $\{(\text{Py}2\text{ald})(\text{ONO})\text{Fe}\}_2\text{-}\mu_2\text{-O}$ ] ( $\mathbf{8}^{\text{Fe}}$ ) with 4 and 6 equiv of PhEH (E = S, Se).

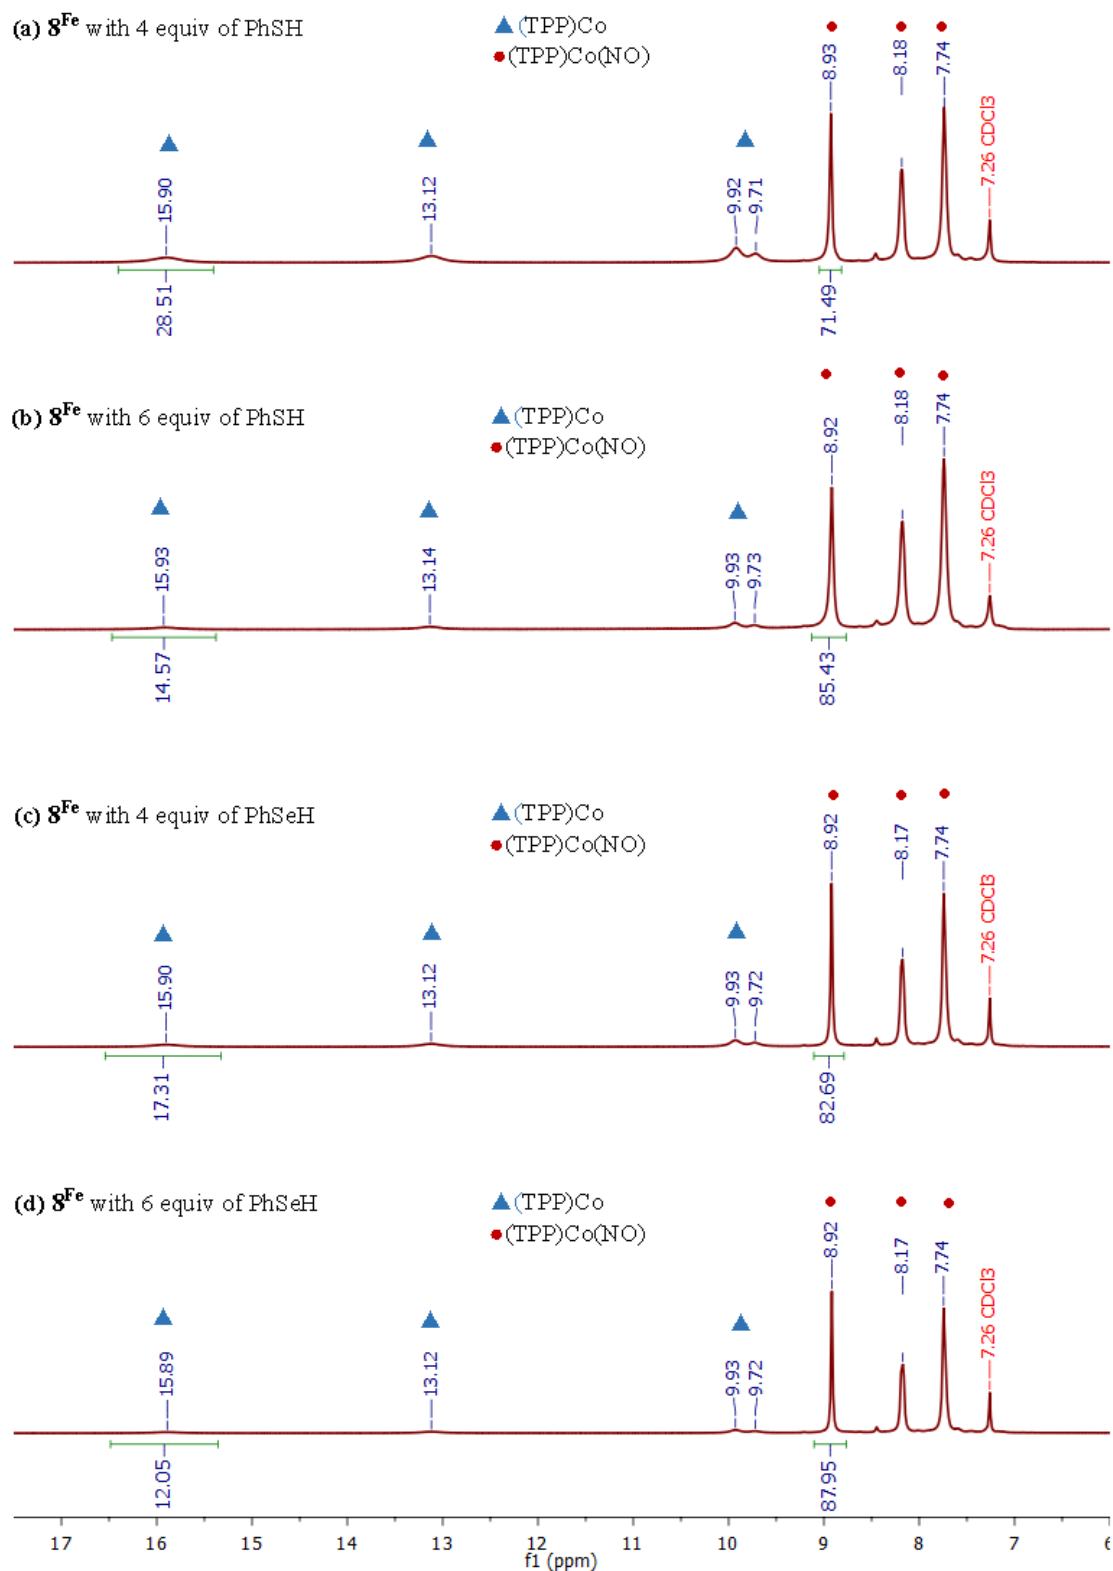

**Figure S70.**  $^1\text{H}$  NMR (400 MHz,  $\text{CDCl}_3$ ) spectra of  $(\text{TPP})\text{Co}^{\text{II}}$  after trapping the NO gas generated by the reaction of  $[\{(\text{Py}2\text{ald})(\text{ONO})\text{Fe}\}_2-\mu_2\text{-O}]$  ( $\mathbf{8}^{\text{Fe}}$ ) with 4 and 6 equiv of PhEH (E = S, Se).

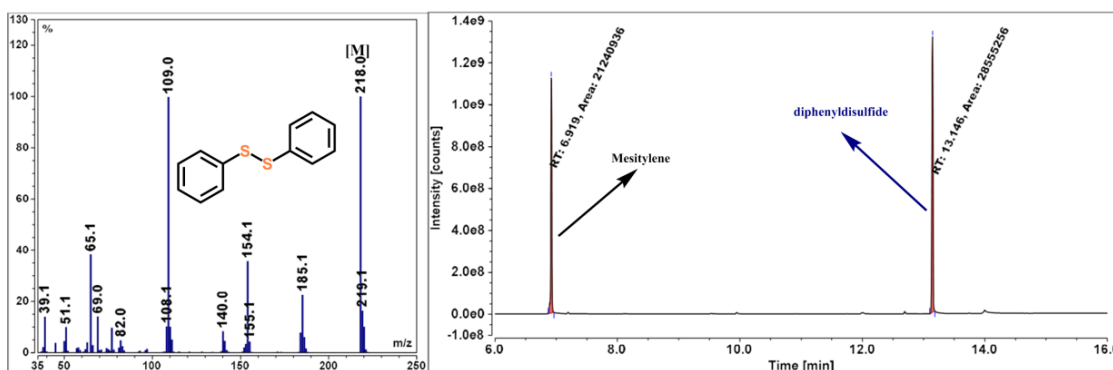

% yield for diphenyldisulfide :

| Retention Time | Peak Area |
|----------------|-----------|
| 13.146         | 28555256  |
| 6.919          | 21240936  |

$$\text{Yield} = \frac{28555256}{21240936} \times 100\% = 134\%$$

**Figure S71.** GC-MS data for the identification and yield calculation (1.34 equiv) of diphenyldisulfide produced in the reaction of [ $\{(\text{Py}2\text{ald})(\text{ONO})\text{Fe}\}_2\text{-}\mu_2\text{-O}$ ] ( $\mathbf{8}^{\text{Fe}}$ ) with 4 equiv PhSH.

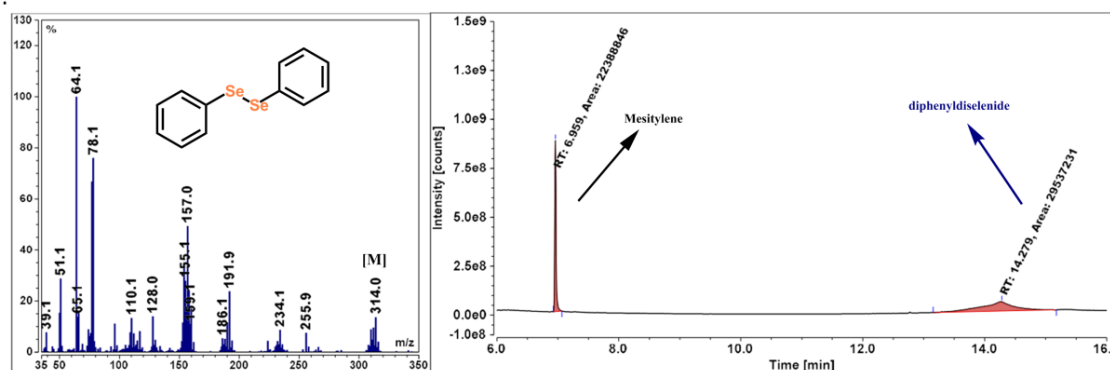

% yield for diphenyldiselenide:

| Retention Time | Peak Area |
|----------------|-----------|
| 14.279         | 29537231  |
| 6.959          | 22388846  |

$$\text{Yield} = \frac{29537231}{22388846} \times 100\% = 132\%$$

**Figure S72.** GC-MS data for the identification and yield calculation (1.32 equiv) of diphenyldiselenide produced in the reaction of [ $\{(\text{Py}2\text{ald})(\text{ONO})\text{Fe}\}_2\text{-}\mu_2\text{-O}$ ] ( $\mathbf{8}^{\text{Fe}}$ ) with 4 equiv PhSeH.

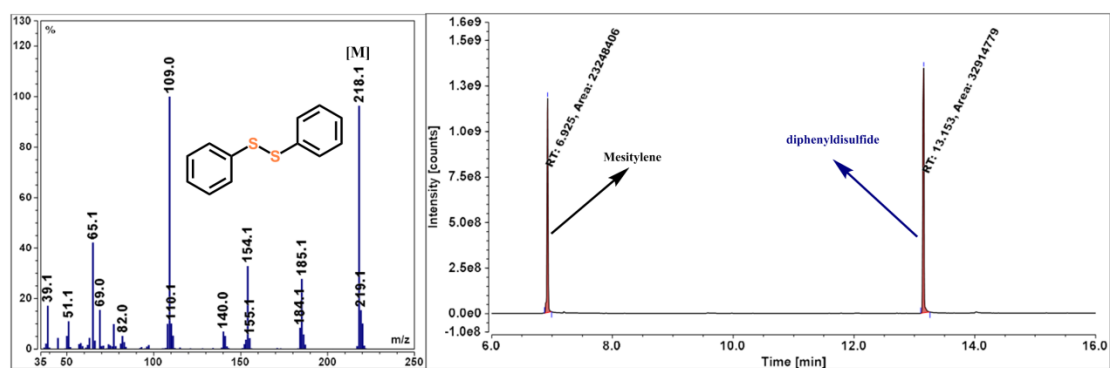

% yield for diphenyldisulfide :

| Retention Time | Peak Area |
|----------------|-----------|
| 13.153         | 32914779  |
| 6.925          | 23248406  |

$$\text{Yield} = \frac{32914779}{23248406} \times 100\% = 141\%$$

**Figure S73.** GC-MS data for the identification and yield (1.41 equiv) calculation of diphenyldisulfide produced in the reaction of  $[\{(\text{Py}2\text{ald})(\text{ONO})\text{Fe}\}_2-\mu_2\text{-O}]$  ( $\mathbf{8}^{\text{Fe}}$ ) with 6 equiv of PhSH.

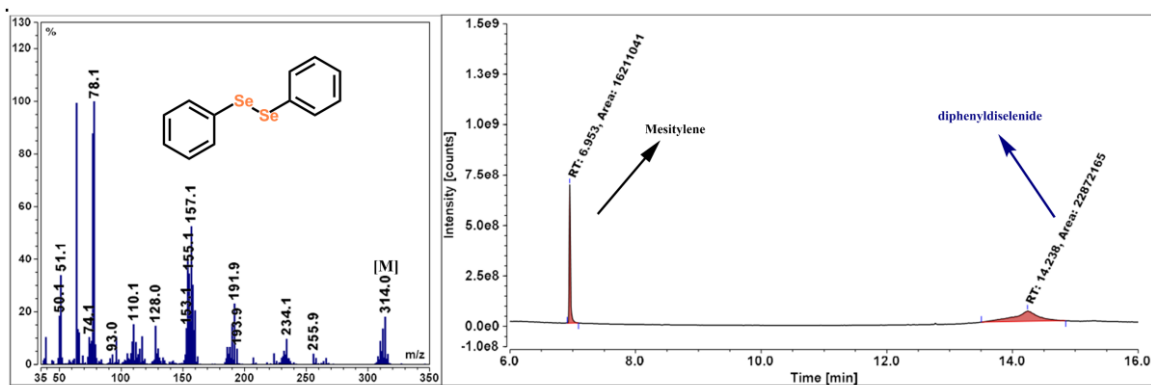

% yield for diphenyldiselenide:

| Retention Time | Peak Area |
|----------------|-----------|
| 14.238         | 22872165  |
| 6.953          | 16211041  |

$$\text{Yield} = \frac{22872165}{16211041} \times 100\% = 141\%$$

**Figure S74.** GC-MS data for the identification and yield calculation (1.41 equiv) of diphenyldiselenide produced in the reaction of  $[\{(\text{Py}2\text{ald})(\text{ONO})\text{Fe}\}_2-\mu_2\text{-O}]$  ( $\mathbf{8}^{\text{Fe}}$ ) with 6 equiv of PhSeH.

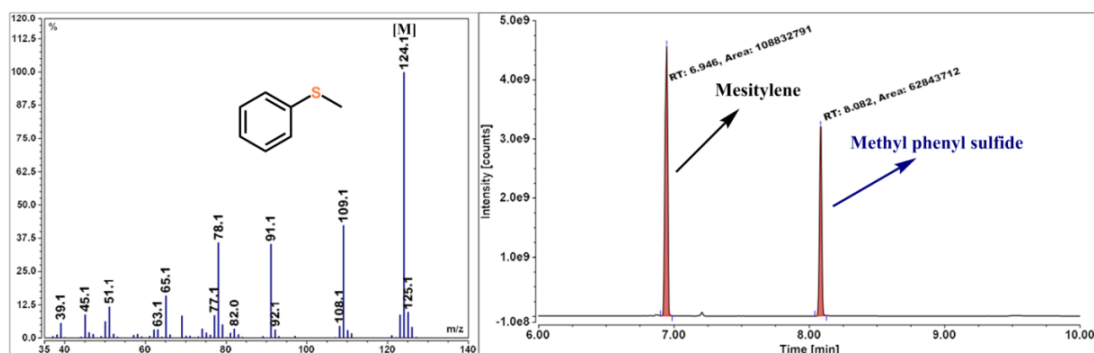

% yield for Methyl phenyl sulfide :

| Retention Time | Peak Area |
|----------------|-----------|
| 8.082          | 62843712  |
| 6.946          | 108832791 |

$$\text{Yield} = \frac{62843712}{108832791} \times 100\% = 58\%$$

**Figure S75.** GC-MS data for the identification and yield (58%) calculation of methylphenyl sulfide produced in the reaction of [(Py2ald)Zn(SPh)] (**1a<sup>Zn</sup>**) with MeI in 1:1 ratio.

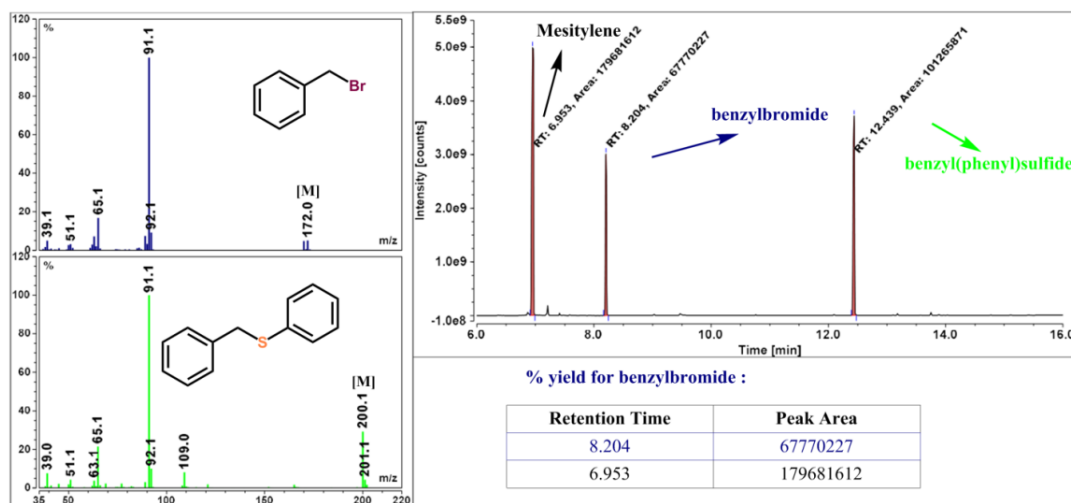

% yield for benzyl bromide :

| Retention Time | Peak Area |
|----------------|-----------|
| 8.204          | 67770227  |
| 6.953          | 179681612 |

$$\text{Yield} = \frac{67770227}{179681612} \times 100\% = 38\%$$

% yield for benzyl(phenyl)sulfide :

| Retention Time | Peak Area |
|----------------|-----------|
| 12.439         | 101265871 |
| 6.953          | 179681612 |

$$\text{Yield} = \frac{101265871}{179681612} \times 100\% = 56\%$$

**Figure S76.** GC-MS data for the identification and yield (56%) calculation of benzyl(phenyl)sulfide produced in the reaction of [(Py2ald)Zn(SPh)] (**1a<sup>Zn</sup>**) with PhCH<sub>2</sub>Br in 1:1 ratio.



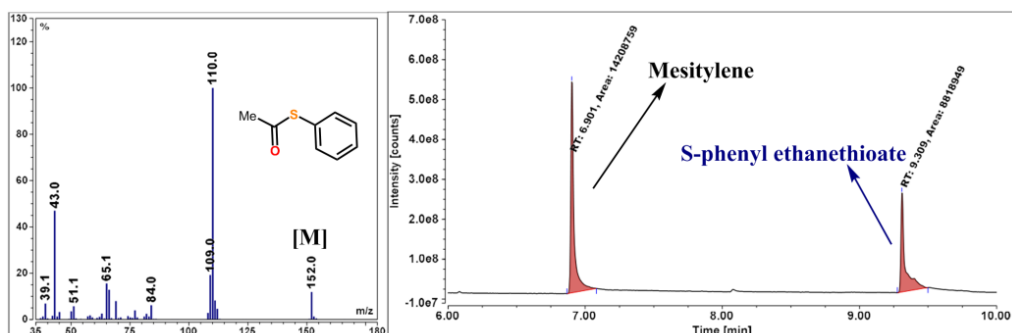

**% yield for S-phenyl ethanethioate:**

| Retention Time | Peak Area |
|----------------|-----------|
| 9.309          | 8818949   |
| 6.901          | 14208759  |

$$\text{Yield} = \frac{8818949}{14208759} \times 100\% = 62\%$$

**Figure S77.** GC-MS data for the identification and yield (62%) calculation of S-phenyl ethanethioate produced in the reaction of [(Py2ald)Zn(SPh)] (**1a<sup>Zn</sup>**) with MeCOCl in 1:1 ratio.

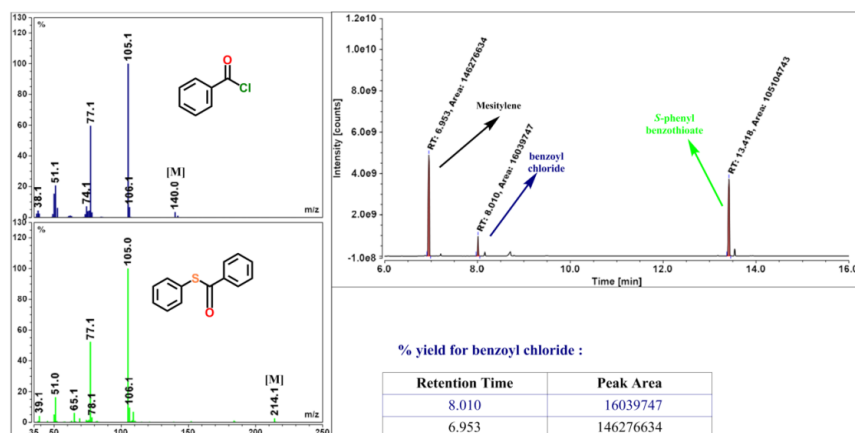

**% yield for benzoyl chloride :**

| Retention Time | Peak Area |
|----------------|-----------|
| 8.010          | 16039747  |
| 6.953          | 146276634 |

$$\text{Yield} = \frac{16039747}{146276634} \times 100\% = 11\%$$

**% yield for S-phenyl benzothioate :**

| Retention Time | Peak Area |
|----------------|-----------|
| 13.148         | 105104743 |
| 6.946          | 146276634 |

$$\text{Yield} = \frac{105104743}{146276634} \times 100\% = 72\%$$

**Figure S78.** GC-MS data for the identification and yield (72%) calculation of S-phenyl benzothioate produced in the reaction of [(Py2ald)Zn(SPh)] (**1a<sup>Zn</sup>**) with PhCOCl in 1:1 ratio.

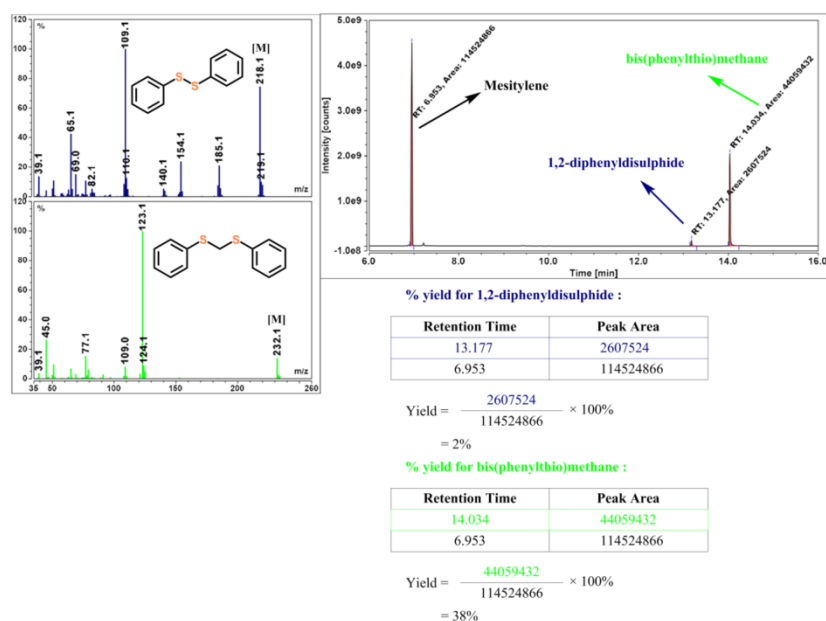

**Figure S79.** Gas chromatographic data for the identification and yield (38%) calculation of bis(phenylthio)methane produced in the reaction of [(Py2ald)Zn(SPh)] (**1a<sup>Zn</sup>**) with CH<sub>2</sub>Br<sub>2</sub> in 1:1 ratio.

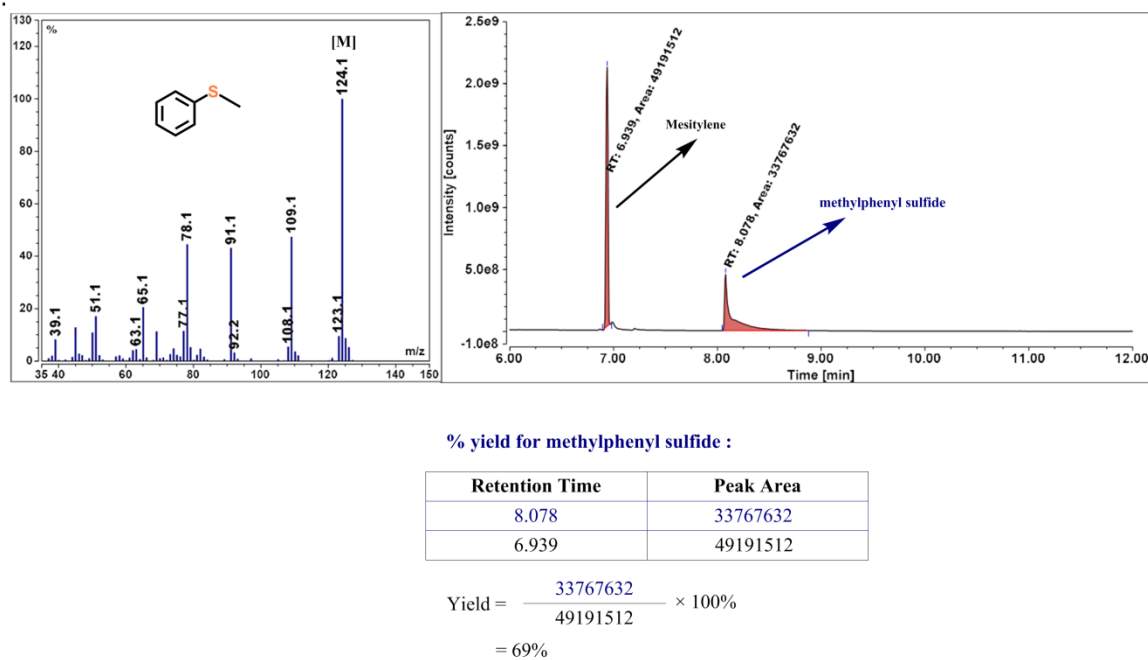

**Figure S80.** Gas chromatographic data for the identification and yield (69%) calculation of methylphenyl sulfide produced in the reaction of [(Py2ald)Fe(SPh)] (**1a<sup>Fe</sup>**) with MeI in 1:1 ratio.

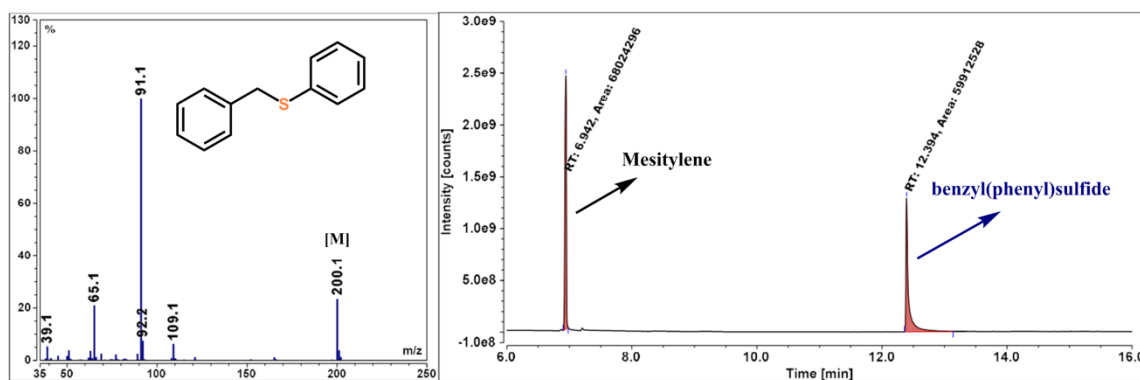

% yield for benzyl(phenyl)sulfide :

| Retention Time | Peak Area |
|----------------|-----------|
| 12.394         | 59912528  |
| 6.942          | 68024296  |

$$\text{Yield} = \frac{59912528}{68024296} \times 100\% = 88\%$$

**Figure S81.** GC-MS data for the identification and yield (88%) calculation of benzyl(phenyl)sulfide produced in the reaction of [(Py2ald)Fe(SPh)] (**1a<sup>Fe</sup>**) with PhCH<sub>2</sub>Br in 1:1 ratio.

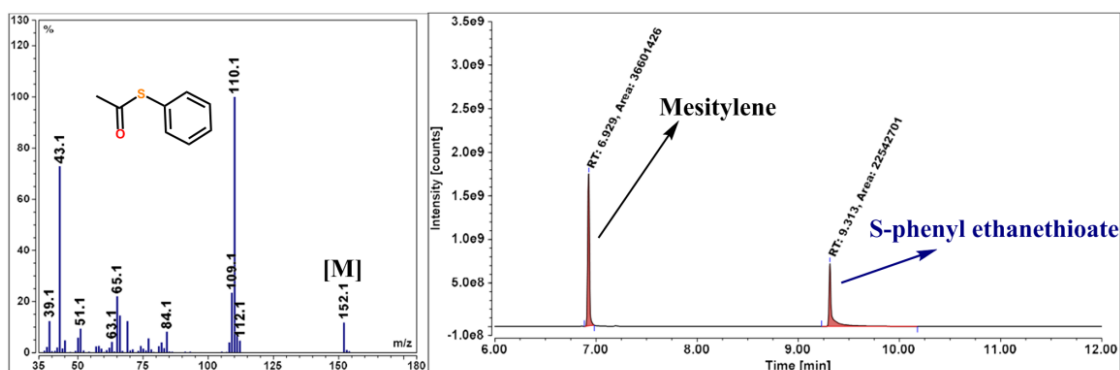

% yield for S-phenyl ethanethioate:

| Retention Time | Peak Area |
|----------------|-----------|
| 9.313          | 22542701  |
| 6.929          | 36601426  |

$$\text{Yield} = \frac{22542701}{36601426} \times 100\% = 62\%$$

**Figure S82.** GC-MS data for the identification and yield (62%) calculation of S-phenyl ethanethioate produced in the reaction of [(Py2ald)Fe(SPh)] (**1a<sup>Fe</sup>**) with MeCOCl in 1:1 ratio.

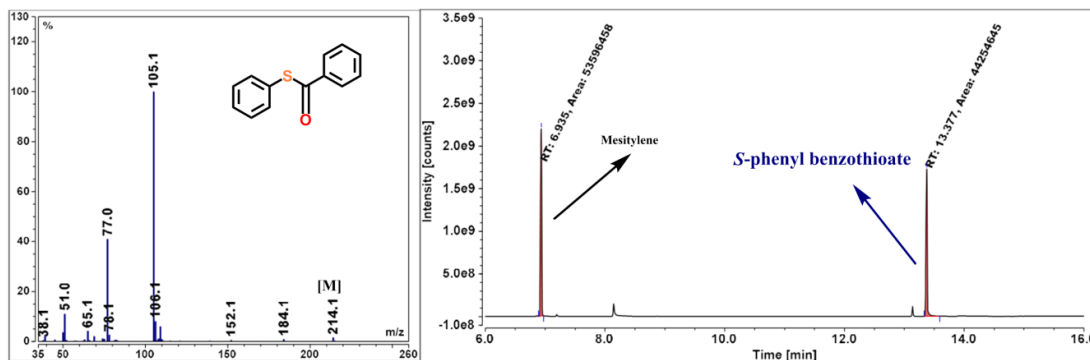

% yield for S-phenyl benzothioate:

| Retention Time | Peak Area |
|----------------|-----------|
| 13.377         | 44254645  |
| 6.935          | 53596458  |

$$\text{Yield} = \frac{44254645}{53596458} \times 100\% = 83\%$$

**Figure S83.** GC-MS data for the identification and yield (83%) calculation of S-phenyl benzothioate produced in the reaction of [(Py2ald)Fe(SPh)] (**1a<sup>Fe</sup>**) with PhCOCl in 1:1 ratio.

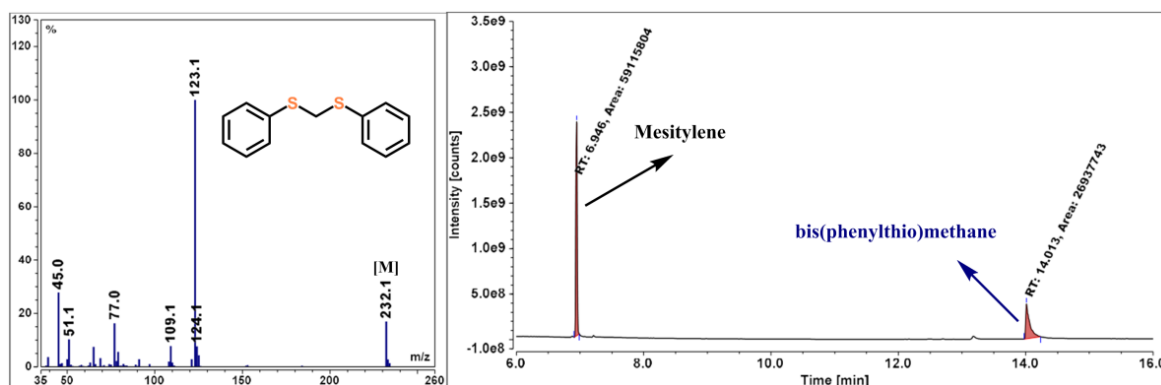

% yield for bis(phenylthio)methane :

| Retention Time | Peak Area |
|----------------|-----------|
| 14.013         | 26937743  |
| 6.946          | 59115804  |

$$\text{Yield} = \frac{26937743}{59115804} \times 100\% = 46\%$$

**Figure S84.** GC-MS data for the identification and yield (46%) calculation of bis(phenylthio)methane produced in the reaction of [(Py2ald)Fe(SPh)] (**1a<sup>Fe</sup>**) with CH<sub>2</sub>Br<sub>2</sub> in 1:1 ratio.

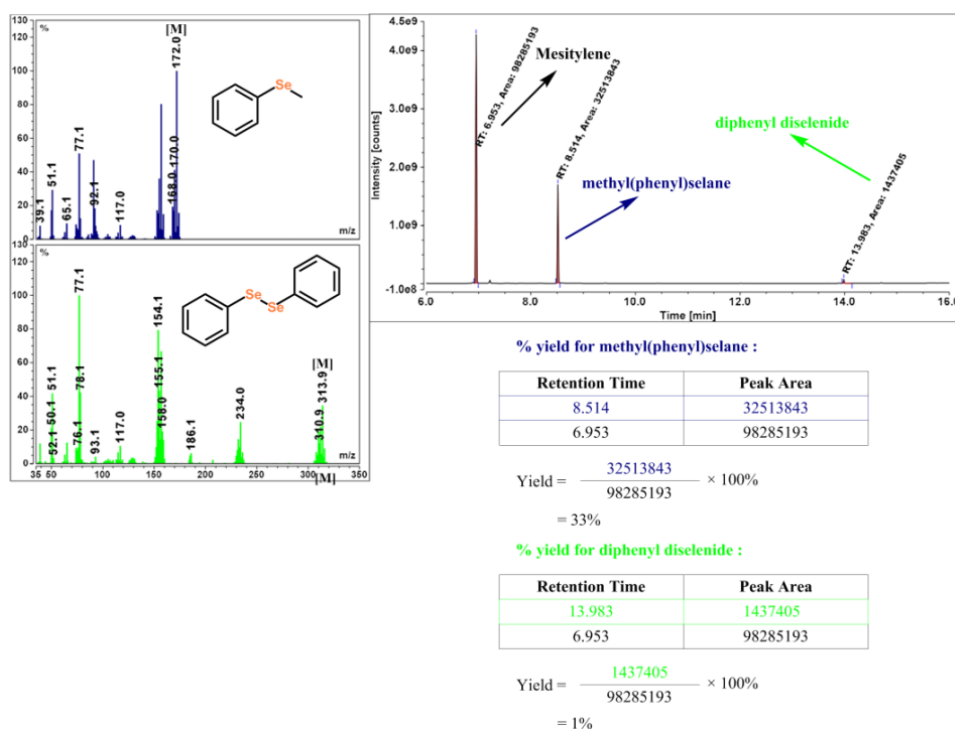

**Figure S85.** GC-MS data for the identification and yield (33%) calculation of methyl(phenyl)selane produced in the reaction of [(Py2ald)Zn(SePh)] ( $2^{\text{Zn}}$ ) with MeI in 1:1 ratio.

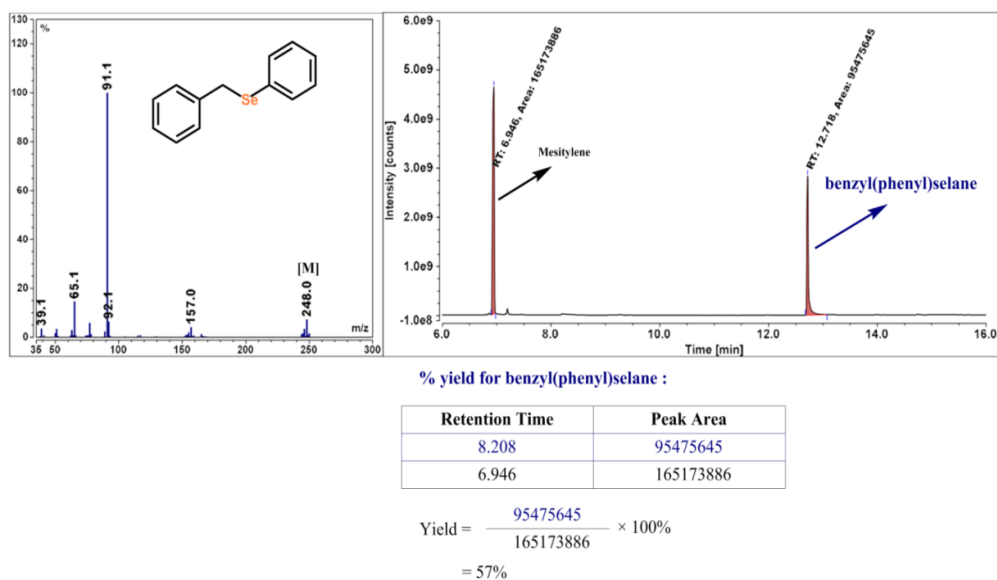

**Figure S86.** GC-MS data for the identification and yield (57%) calculation of benzyl(phenyl)selane produced in the reaction of [(Py2ald)Zn(SePh)] ( $2^{\text{Zn}}$ ) with PhCH<sub>2</sub>Br in 1:1 ratio.

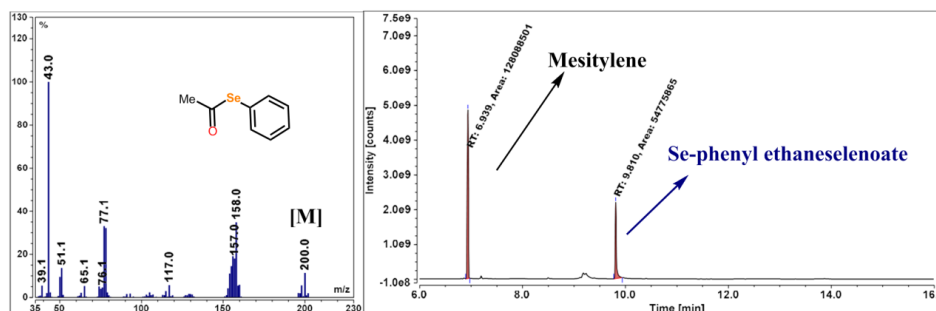

**% yield for Se-phenyl ethaneselenoate:**

| Retention Time | Peak Area |
|----------------|-----------|
| 9.309          | 54775865  |
| 6.901          | 128088501 |

$$\text{Yield} = \frac{54775865}{128088501} \times 100\% = 45\%$$

**Figure S87.** GC-MS data for the identification and yield (45%) calculation of Se-phenyl ethaneselenoate produced in the reaction of [(Py2ald)Zn(SePh)] ( $2^{\text{Zn}}$ ) with MeCOCl in 1:1 ratio.

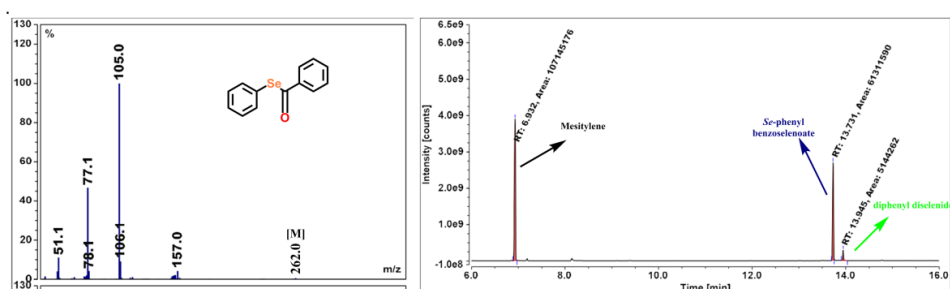

**% yield for Se-phenyl benzoselenoate :**

| Retention Time | Peak Area |
|----------------|-----------|
| 13.731         | 61311590  |
| 6.932          | 107145176 |

$$\text{Yield} = \frac{61311590}{107145176} \times 100\% = 57\%$$

**% yield for diphenyl diselenide :**

| Retention Time | Peak Area |
|----------------|-----------|
| 13.945         | 5144262   |
| 6.953          | 107145176 |

$$\text{Yield} = \frac{5144262}{107145176} \times 100\% = 5\%$$

**Figure S88.** GC-MS data for the identification and yield (57%) calculation of Se-phenyl benzoselenoate produced in the reaction of [(Py2ald)Zn(SePh)] ( $2^{\text{Zn}}$ ) with PhCOCl in 1:1 ratio.

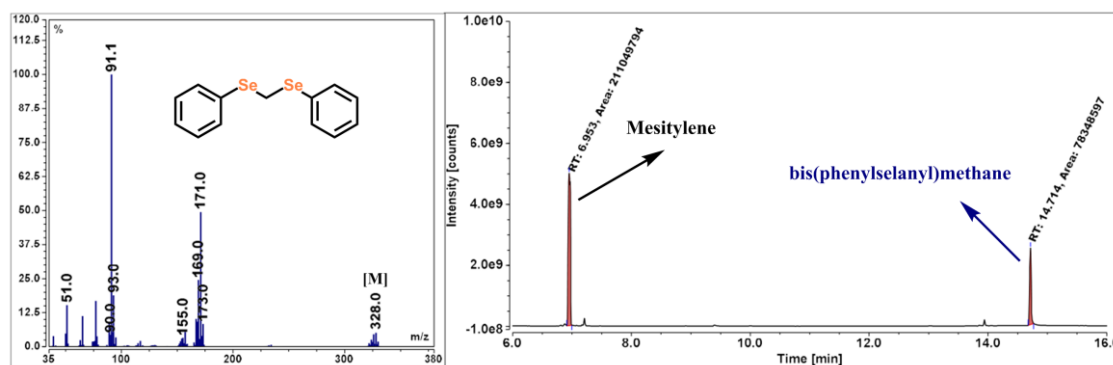

% yield for bis(phenylselanyl)methane :

| Retention Time | Peak Area |
|----------------|-----------|
| 13.177         | 78348597  |
| 6.953          | 211049794 |

$$\text{Yield} = \frac{78348597}{211049794} \times 100\% = 37\%$$

**Figure S89.** GC-MS data for the identification and yield (37%) calculation of bis(phenylselanyl)methane produced in the reaction of [(Py2ald)Zn(SePh)] ( $2^{\text{Zn}}$ ) with  $\text{CH}_2\text{Br}_2$  in 1:1 ratio.

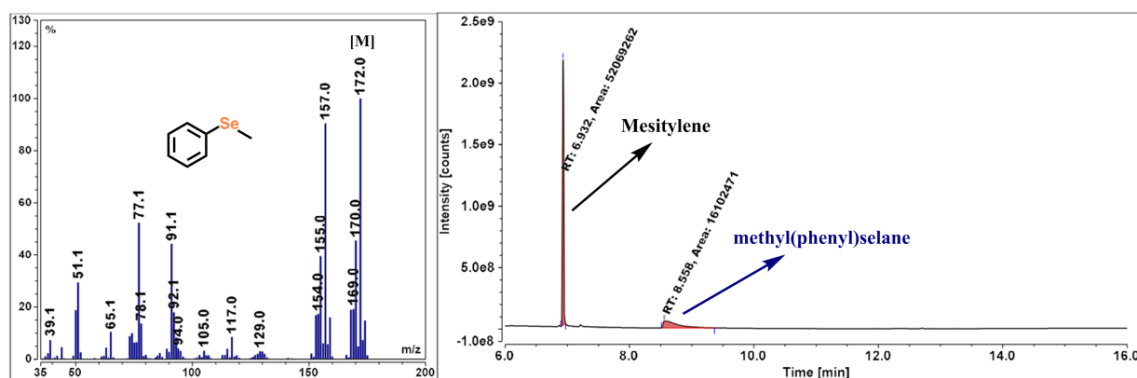

% yield for methyl(phenyl)sulfane :

| Retention Time | Peak Area |
|----------------|-----------|
| 8.558          | 16102471  |
| 6.932          | 52069262  |

$$\text{Yield} = \frac{16102471}{52069262} \times 100\% = 31\%$$

**Figure S90.** GC-MS data for the identification and yield (31%) calculation of methyl(phenyl)sulfane produced in the reaction of [(Py2ald)Fe(SePh)] ( $2^{\text{Fe}}$ ) with MeI in 1:1 ratio.

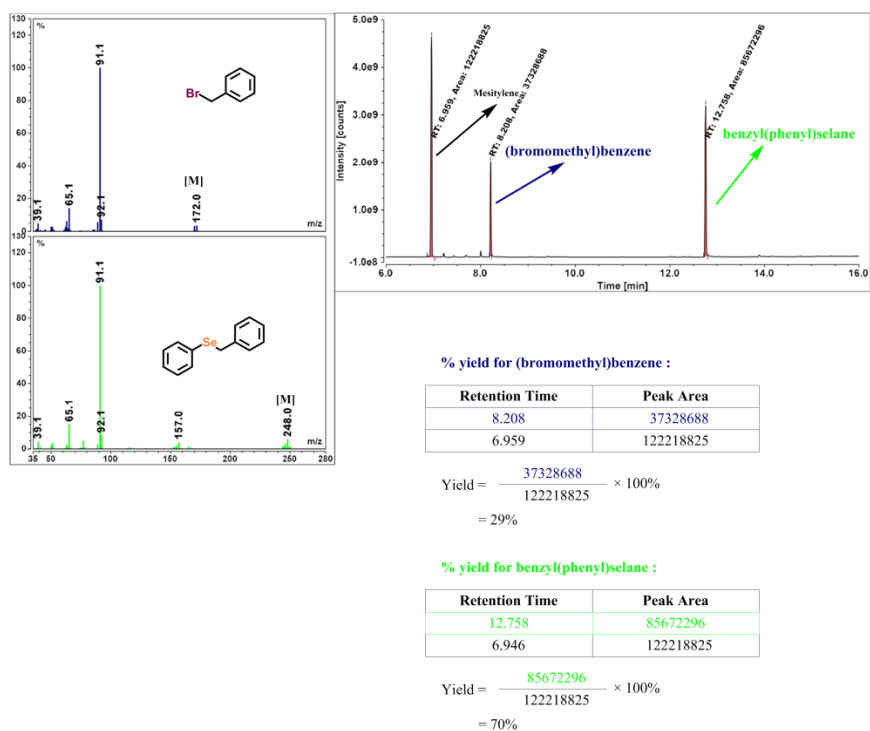

**Figure S91.** GC-MS data for the identification and yield (70%) calculation of benzyl(phenyl)selane produced in the reaction of [(Py2ald)Fe(SePh)] (**2<sup>Fe</sup>**) with PhCH<sub>2</sub>Br in 1:1 ratio.

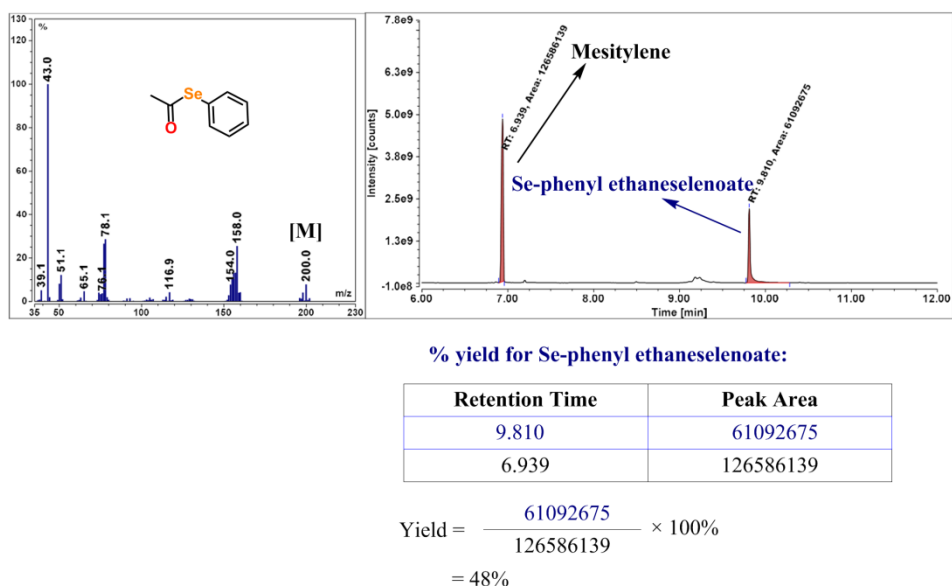

**Figure S92.** GC-MS data for the identification and yield (48%) calculation of Se-phenyl ethaneselenoate produced in the reaction of [(Py2ald)Fe(SePh)] (**2<sup>Fe</sup>**) with MeCOCl in 1:1 ratio.



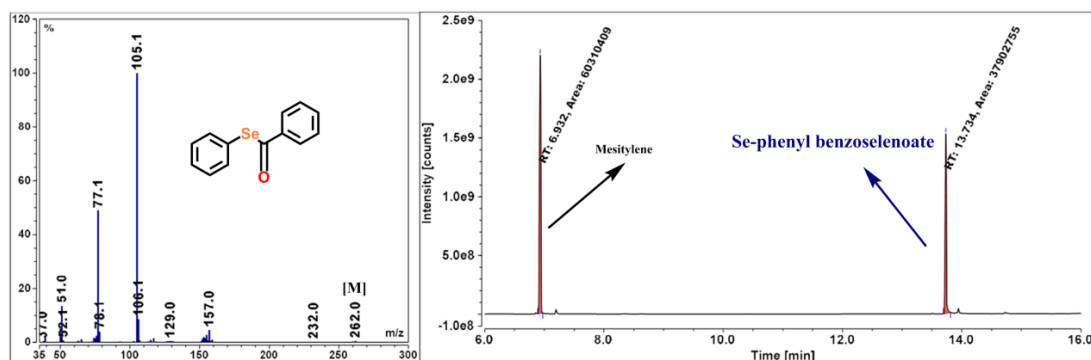

**% yield for Se-phenyl benzoselenoate:**

| Retention Time | Peak Area |
|----------------|-----------|
| 13.734         | 37902755  |
| 6.932          | 60310409  |

$$\text{Yield} = \frac{37902755}{60310409} \times 100\% = 63\%$$

**Figure S93.** GC-MS data for the identification and yield (63%) calculation of Se-phenyl benzoselenoate produced in the reaction of [(Py2ald)Fe(SePh)] ( $2^{\text{Fe}}$ ) with PhCOCl in 1:1 ratio.

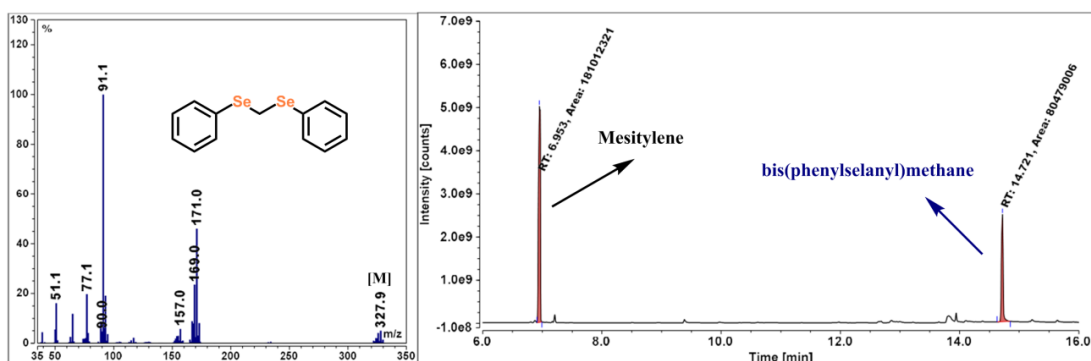

**% yield for bis(phenylselanyl)methane :**

| Retention Time | Peak Area |
|----------------|-----------|
| 14.721         | 80479006  |
| 6.953          | 181012321 |

$$\text{Yield} = \frac{80479006}{181012321} \times 100\% = 44\%$$

**Figure S94.** GC-MS data for the identification and yield (44%) calculation of bis(phenylselanyl)methane produced in the reaction of [(Py2ald)Fe(SePh)] ( $2^{\text{Fe}}$ ) with  $\text{CH}_2\text{Br}_2$  in 1:1 ratio.

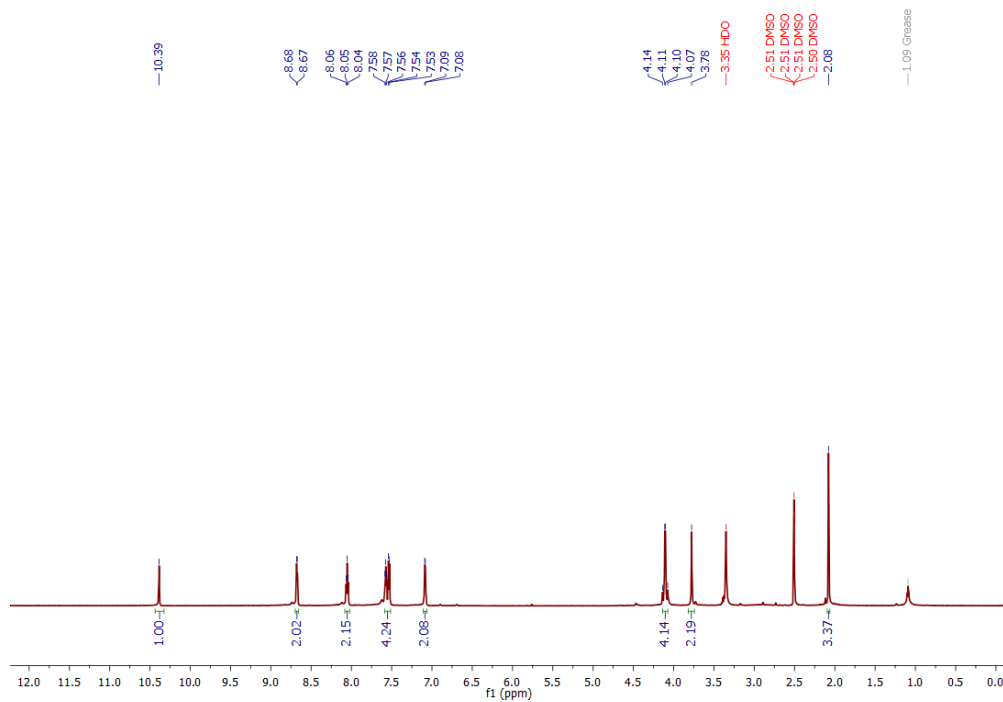

**Figure 95.**  $^1\text{H}$  NMR (600 MHz,  $\text{DMSO-d}_6$ ) spectrum of  $[(\text{Py}2\text{ald})\text{Zn}]_2(\text{BF}_4)_2$  ( $5^{\text{Zn}}(\text{BF}_4)_2$ ) obtained from the reaction of  $[(\text{Py}2\text{ald})\text{Zn}(\text{SPh})]$  ( $1\text{a}^{\text{Zn}}$ ) with MeI in DMF.

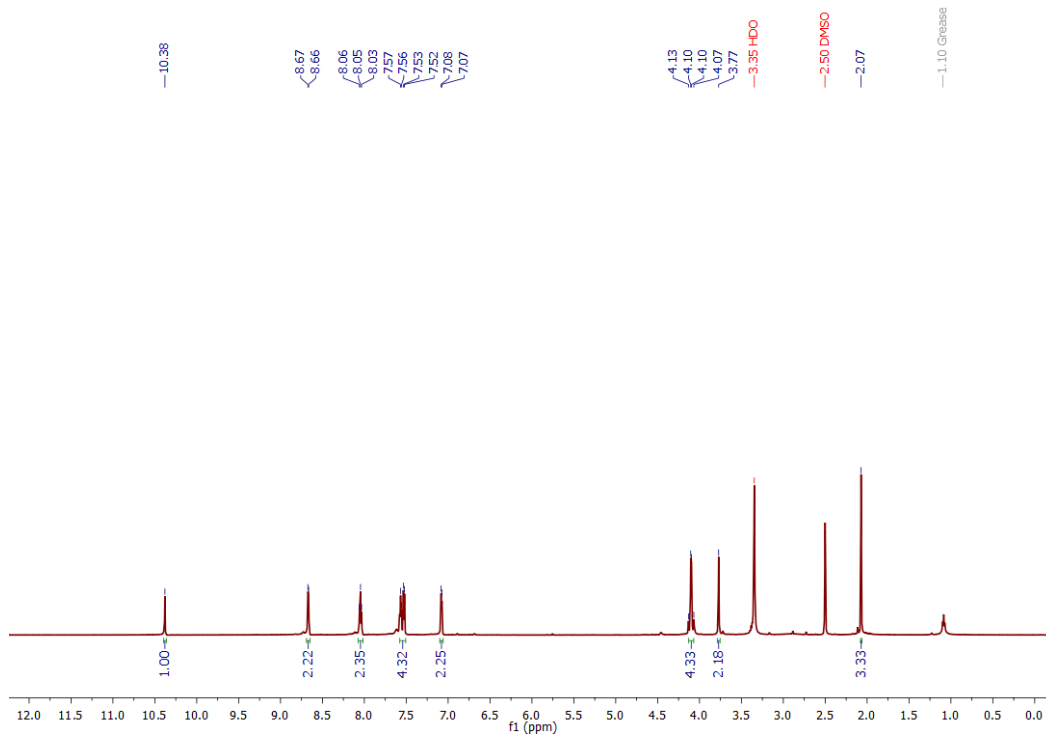

**Figure S96.**  $^1\text{H}$  NMR (600 MHz,  $\text{DMSO-d}_6$ ) spectrum of  $[(\text{Py}2\text{ald})\text{Zn}]_2(\text{BF}_4)_2$  ( $5^{\text{Zn}}(\text{BF}_4)_2$ ) obtained from the reaction of  $[(\text{Py}2\text{ald})\text{Zn}(\text{SPh})]$  ( $1\text{a}^{\text{Zn}}$ ) with  $\text{PhCH}_2\text{Br}$  in DMF.

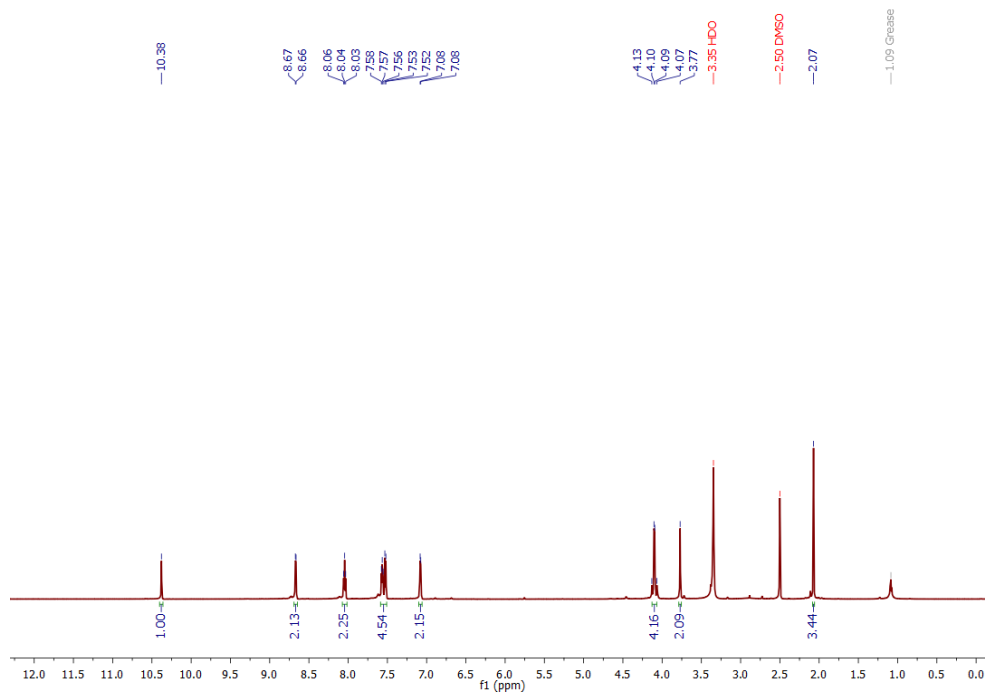

**Figure S97.**  $^1\text{H}$  NMR (600 MHz,  $\text{DMSO-d}_6$ ) spectrum of  $[(\text{Py}2\text{ald})\text{Zn}]_2(\text{BF}_4)_2$  ( $5^{\text{Zn}}(\text{BF}_4)_2$ ) obtained from the reaction of  $[(\text{Py}2\text{ald})\text{Zn}(\text{SPh})]$  ( $1\text{a}^{\text{Zn}}$ ) with  $\text{MeC}(\text{O})\text{Cl}$  in DMF.

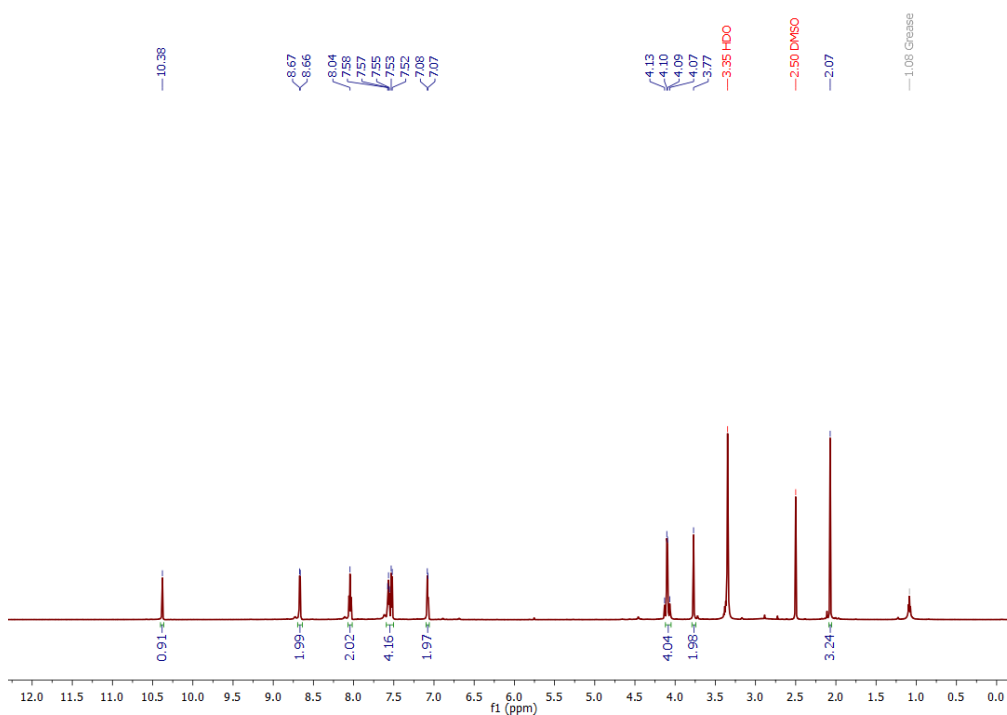

**Figure S98.**  $^1\text{H}$  NMR (600 MHz,  $\text{DMSO-d}_6$ ) spectrum of  $[(\text{Py}2\text{ald})\text{Zn}]_2(\text{BF}_4)_2$  ( $5^{\text{Zn}}(\text{BF}_4)_2$ ) obtained from the reaction of  $[(\text{Py}2\text{ald})\text{Zn}(\text{SPh})]$  ( $1\text{a}^{\text{Zn}}$ ) with  $\text{PhC}(\text{O})\text{Cl}$  in MeCN.

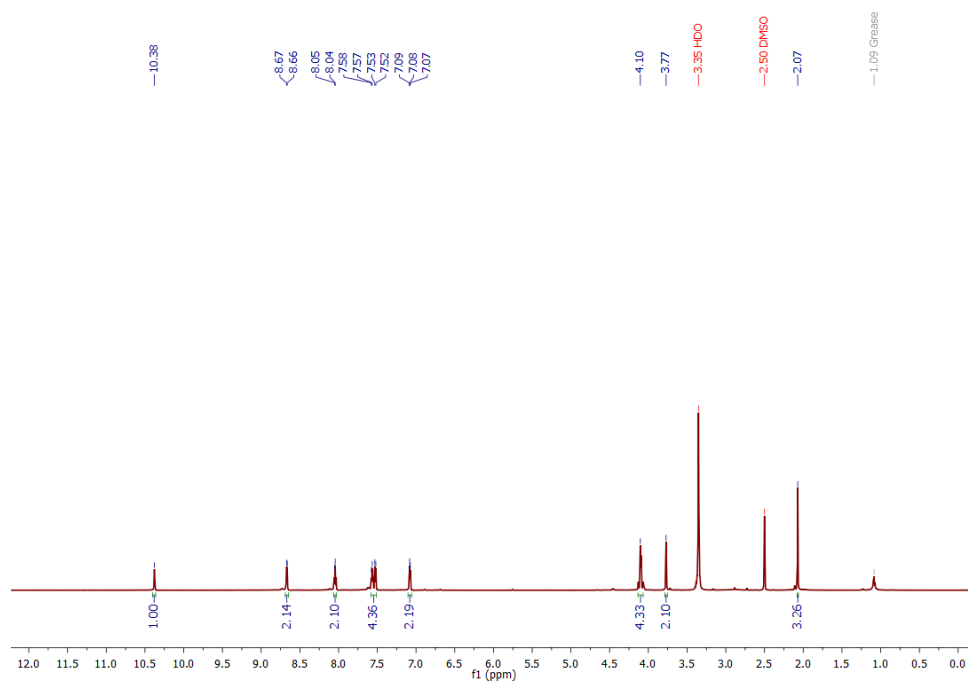

**Figure S99.**  $^1\text{H}$  NMR (600 MHz,  $\text{DMSO-d}_6$ ) spectrum of  $[(\text{Py}2\text{ald})\text{Zn}]_2(\text{BF}_4)_2$  ( $5^{\text{Zn}}(\text{BF}_4)_2$ ) obtained from the reaction of  $[(\text{Py}2\text{ald})\text{Zn}(\text{SPh})]$  ( $1\text{a}^{\text{Zn}}$ ) with  $\text{CH}_2\text{Br}_2$  in DMF.

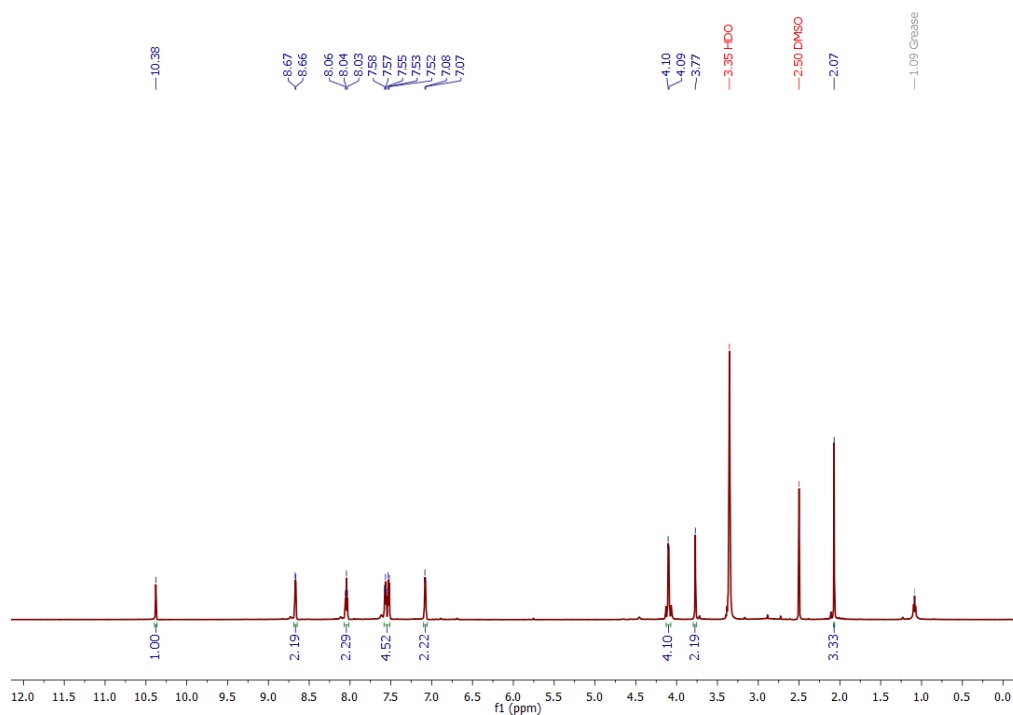

**Figure S100.**  $^1\text{H}$  NMR (600 MHz,  $\text{DMSO-d}_6$ ) spectrum of  $[(\text{Py}2\text{ald})\text{Zn}]_2(\text{BF}_4)_2$  ( $5^{\text{Zn}}(\text{BF}_4)_2$ ) obtained from the reaction of  $[(\text{Py}2\text{ald})\text{Zn}(\text{SePh})]$  ( $2^{\text{Zn}}$ ) with MeI in DMF solution.

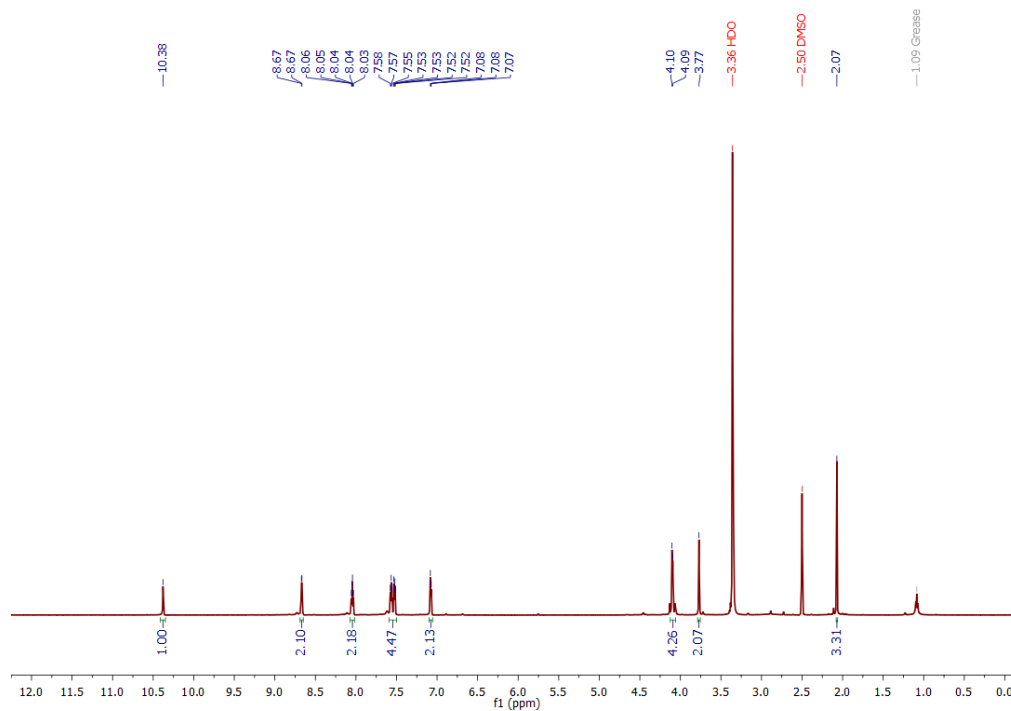

**Figure S101.**  $^1\text{H}$  NMR (600 MHz,  $\text{DMSO-d}_6$ ) spectrum of  $[(\text{Py}2\text{ald})\text{Zn}]_2(\text{BF}_4)_2$  ( $5^{\text{Zn}}(\text{BF}_4)_2$ ) obtained from the reaction of  $[(\text{Py}2\text{ald})\text{Zn}(\text{SePh})]$  ( $2^{\text{Zn}}$ ) with  $\text{PhCH}_2\text{Br}$  in DMF.

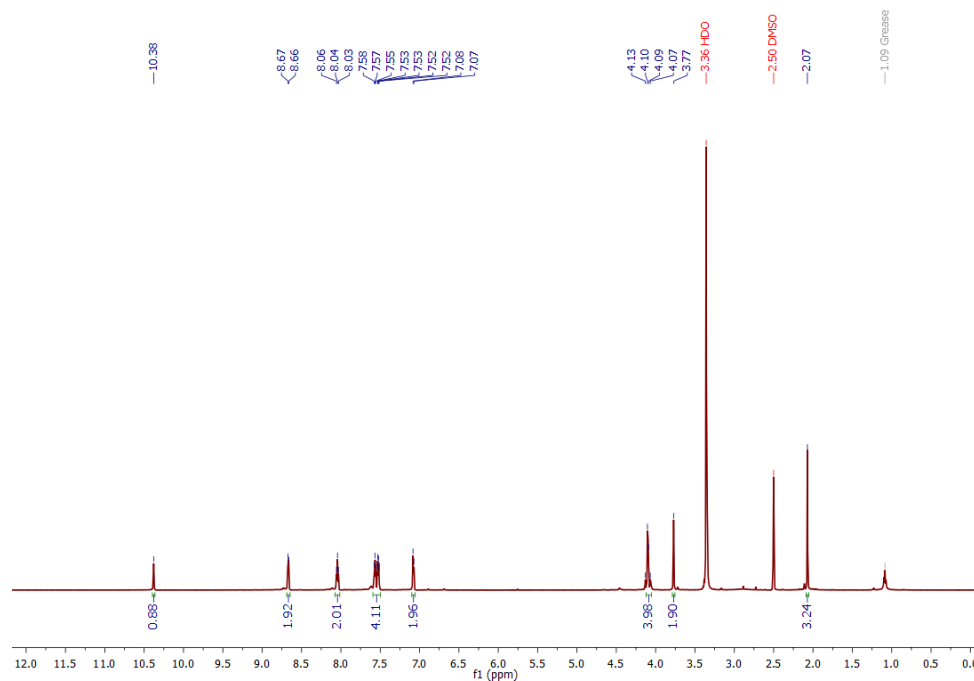

**Figure S102.**  $^1\text{H}$  NMR (600 MHz,  $\text{DMSO-d}_6$ ) spectrum of  $[(\text{Py}2\text{ald})\text{Zn}]_2(\text{BF}_4)_2$  ( $5^{\text{Zn}}(\text{BF}_4)_2$ ) obtained from the reaction of  $[(\text{Py}2\text{ald})\text{Zn}(\text{SePh})]$  ( $2^{\text{Zn}}$ ) with  $\text{MeC}(\text{O})\text{Cl}$  in DMF solution.

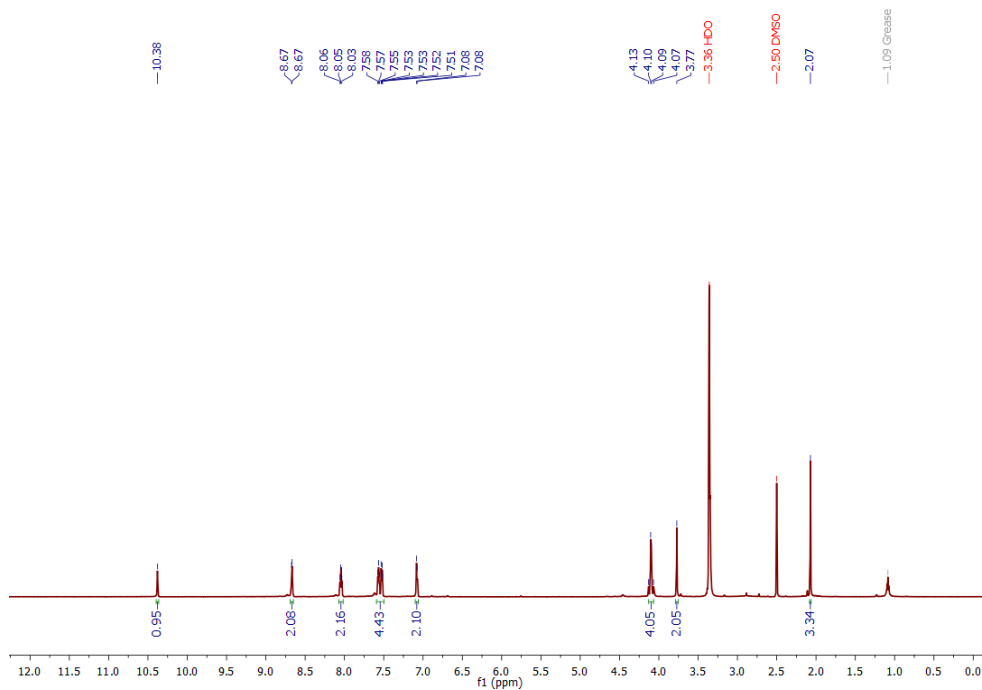

**Figure S103.**  $^1\text{H}$  NMR (600 MHz,  $\text{DMSO-d}_6$ ) spectrum of  $[(\text{Py2ald})\text{Zn}]_2(\text{BF}_4)_2$  ( $5^{\text{Zn}}(\text{BF}_4)_2$ ) obtained from the reaction of  $[(\text{Py2ald})\text{Zn}(\text{SePh})]$  ( $2^{\text{Zn}}$ ) with  $\text{PhC}(\text{O})\text{Cl}$  in  $\text{MeCN}$ .

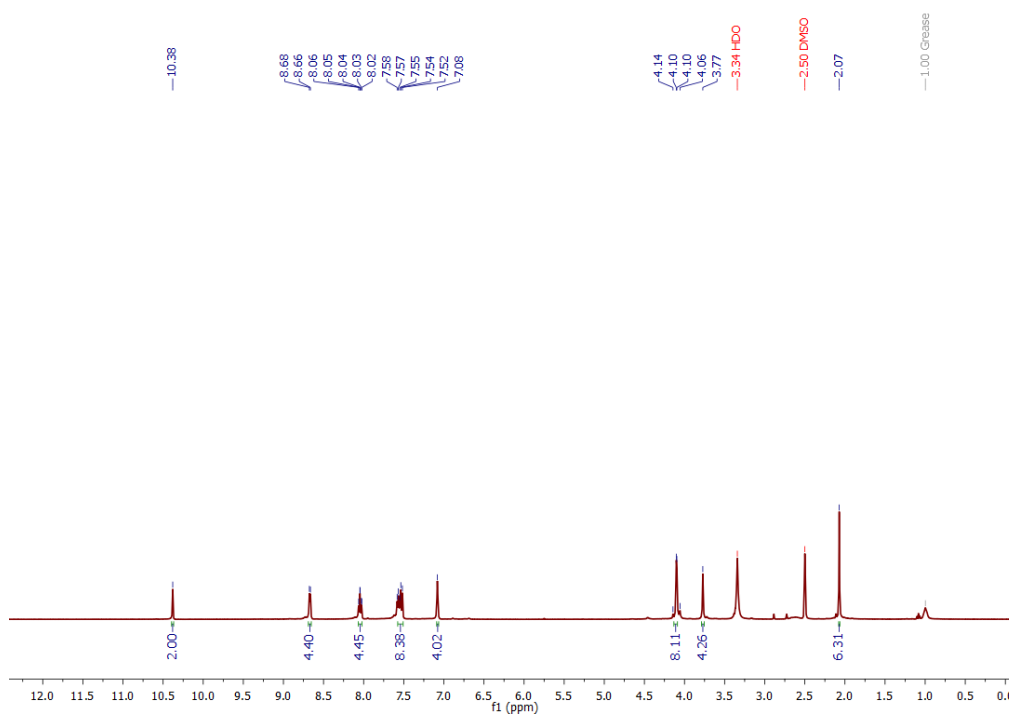

**Figure S104.**  $^1\text{H}$  NMR (400 MHz,  $\text{DMSO-d}_6$ ) spectrum of  $[(\text{Py2ald})\text{Zn}]_2(\text{BF}_4)_2$  ( $5^{\text{Zn}}(\text{BF}_4)_2$ ) obtained from the reaction of  $[(\text{Py2ald})\text{Zn}(\text{SePh})]$  ( $2^{\text{Zn}}$ ) with  $\text{CH}_2\text{Br}_2$  in  $\text{DMF}$ .

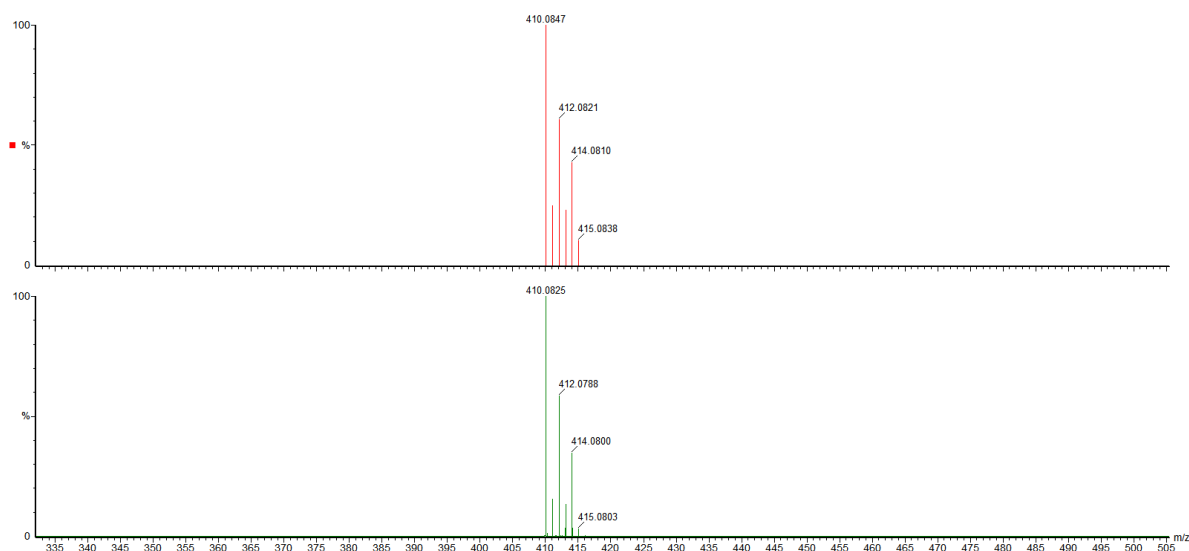

**Figure S105.** Mass spectrometric data (in MeCN) for  $[(\text{Py}2\text{ald})\text{Zn}]_2(\text{BF}_4)_2$  ( $5^{\text{Zn}}(\text{BF}_4)_2$ ) obtained from the reaction of  $[(\text{Py}2\text{ald})\text{Zn}(\text{SPh})]$  ( $1\text{a}^{\text{Zn}}$ ) with MeI shows the presence of  $[(\text{Py}2\text{ald})\text{Zn}]^+$  (m/z: 410.0847, simulated data, orange line; 410.0825, observed data, green line).

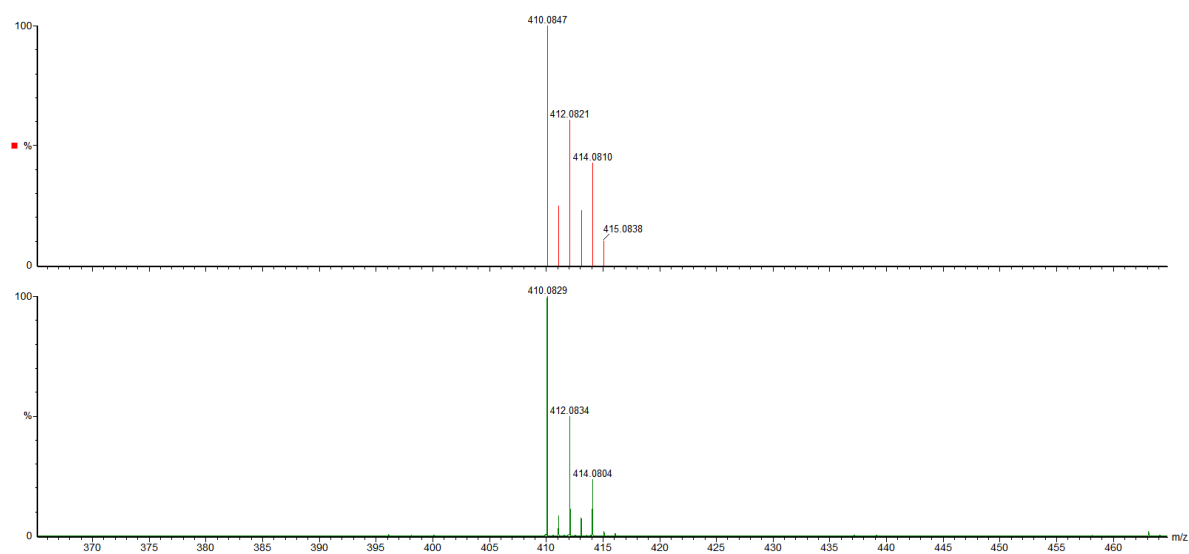

**Figure S106.** Mass spectrometric data (in MeCN) for  $[(\text{Py}2\text{ald})\text{Zn}]_2(\text{BF}_4)_2$  ( $5^{\text{Zn}}(\text{BF}_4)_2$ ) obtained from the reaction of  $[(\text{Py}2\text{ald})\text{Zn}(\text{SPh})]$  ( $1\text{a}^{\text{Zn}}$ ) with  $\text{PhCH}_2\text{Br}$  shows the presence of  $[(\text{Py}2\text{ald})\text{Zn}]^+$  (m/z: 410.0847, simulated data, orange line; 410.0829, observed data, green line).

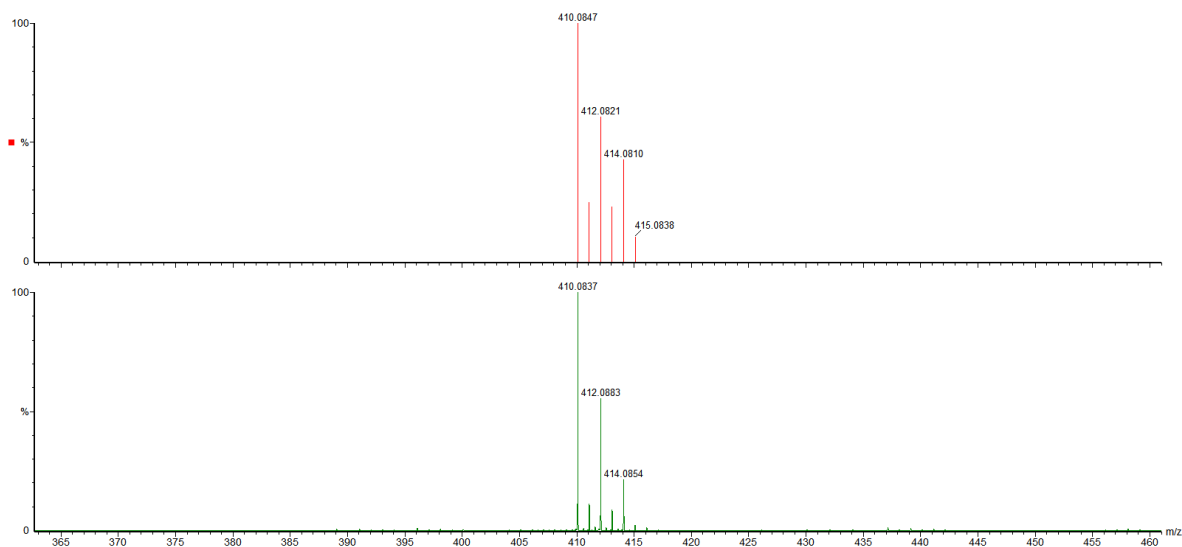

**Figure S107.** Mass spectrometric data (in MeCN) for  $[(\text{Py}2\text{ald})\text{Zn}]_2(\text{BF}_4)_2$  ( $5^{\text{Zn}}(\text{BF}_4)_2$ ) obtained from the reaction of  $[(\text{Py}2\text{ald})\text{Zn}(\text{SPh})]$  ( $1\text{a}^{\text{Zn}}$ ) with  $\text{MeC}(\text{O})\text{Cl}$ , which shows the presence of  $[(\text{Py}2\text{ald})\text{Zn}]^+$  (m/z: 410.0847, simulated data, orange line; 410.0837, observed data, green line).

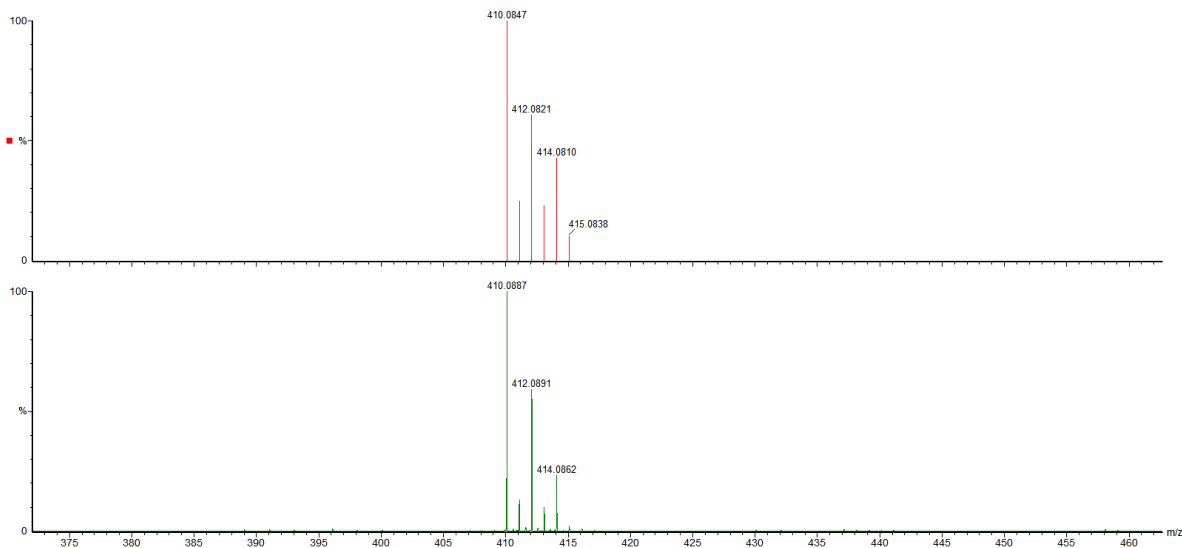

**Figure S108.** Mass spectrometric data (in MeCN) for  $[(\text{Py}2\text{ald})\text{Zn}]_2(\text{BF}_4)_2$  ( $5^{\text{Zn}}(\text{BF}_4)_2$ ) obtained from the reaction of  $[(\text{Py}2\text{ald})\text{Zn}(\text{SPh})]$  ( $1\text{a}^{\text{Zn}}$ ) with  $\text{PhC}(\text{O})\text{Cl}$ , shows the presence of  $[(\text{Py}2\text{ald})\text{Zn}]^+$  (m/z: 410.0847, simulated data, orange line; 410.0887, observed data, green line).



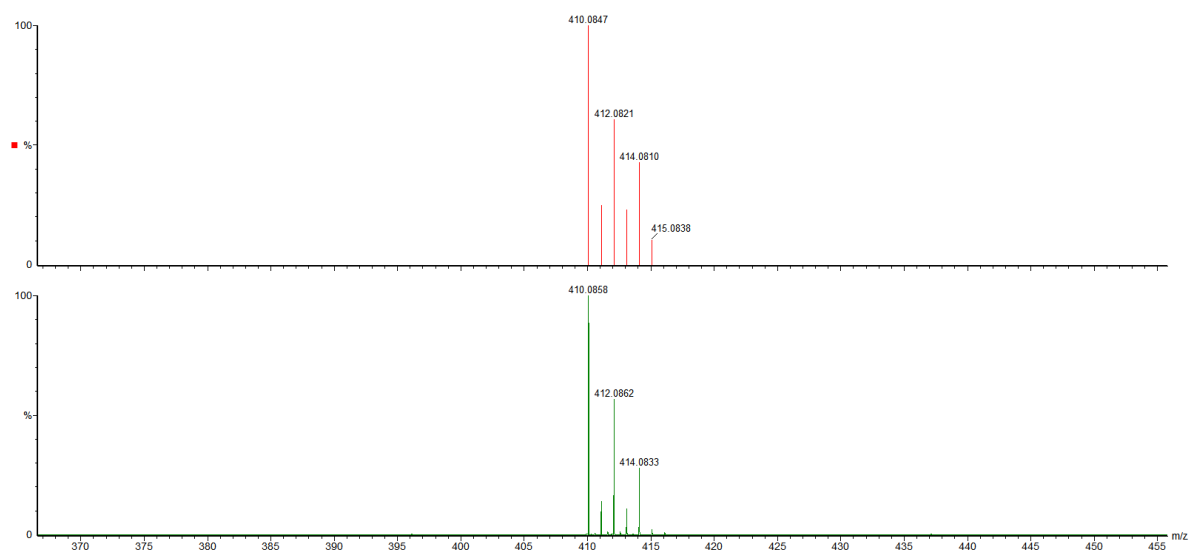

**Figure S109.** Mass spectrometric data (in MeCN) for  $[(\text{Py}2\text{ald})\text{Zn}]_2(\text{BF}_4)_2$  ( $5^{\text{Zn}}(\text{BF}_4)_2$ ) obtained from the reaction of  $[(\text{Py}2\text{ald})\text{Zn}(\text{SPh})]$  ( $1^{\text{aZn}}$ ) with  $\text{CH}_2\text{Br}_2$  shows the presence of  $[(\text{Py}2\text{ald})\text{Zn}]^+$  ( $m/z$ : 410.0847, simulated data, orange line; 410.0858, observed data, green line).

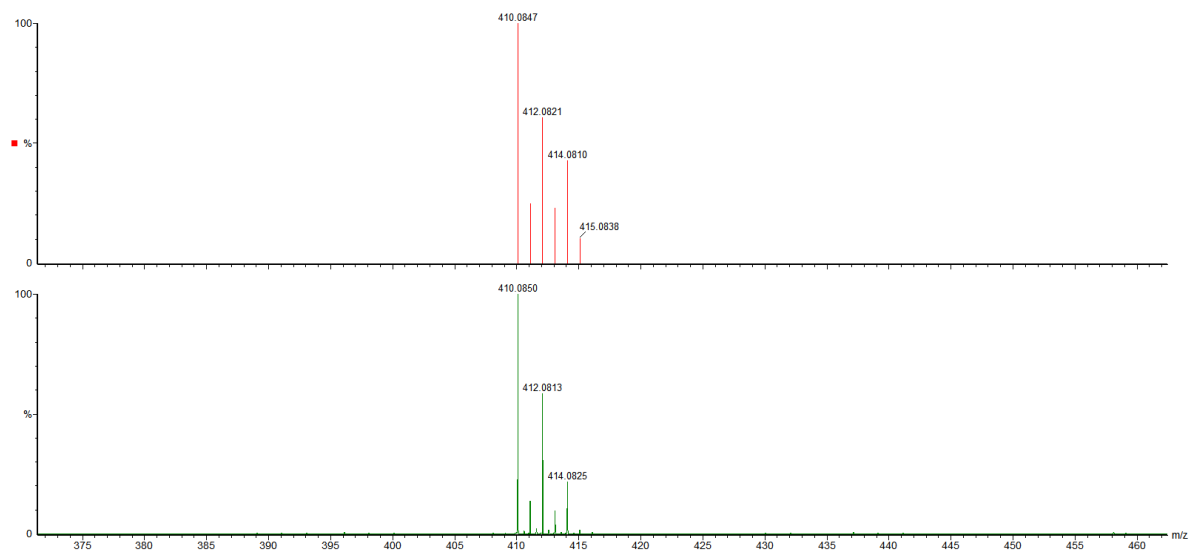

**Figure S110.** Mass spectrometric data (in MeCN) for  $[(\text{Py}2\text{ald})\text{Zn}]_2(\text{BF}_4)_2$  ( $5^{\text{Zn}}(\text{BF}_4)_2$ ) obtained from the reaction of  $[(\text{Py}2\text{ald})\text{Zn}(\text{SePh})]$  ( $2^{\text{Zn}}$ ) with MeI shows the presence of  $[(\text{Py}2\text{ald})\text{Zn}]^+$  ( $m/z$ : 410.0847, simulated data, orange line; 410.0850, observed data, green line).

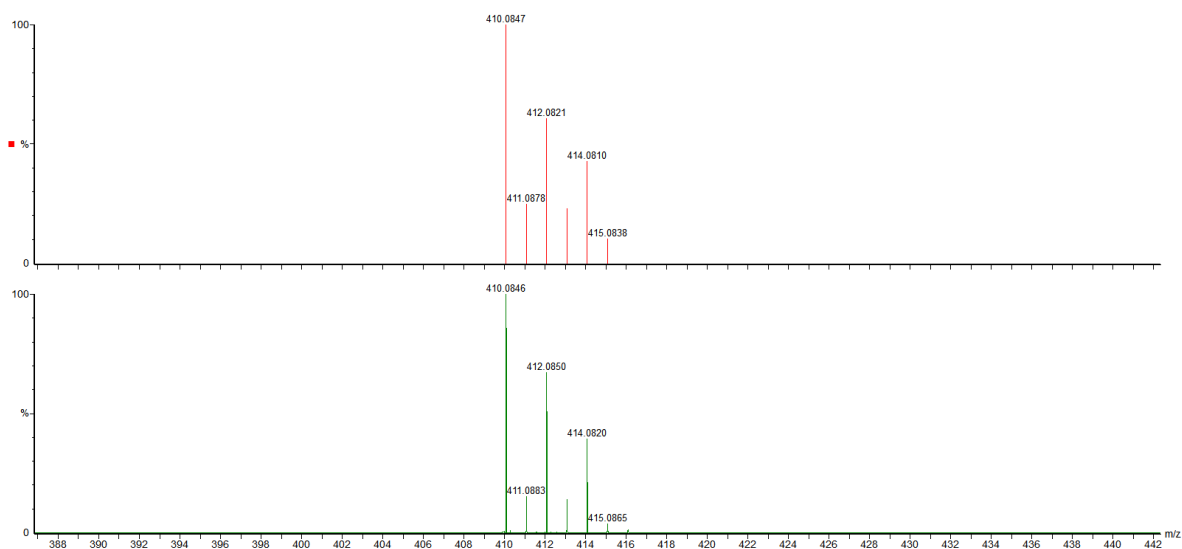

**Figure S111.** Mass spectrometric data (in MeCN) for  $[(\text{Py}2\text{ald})\text{Zn}]_2(\text{BF}_4)_2$  ( $5^{\text{Zn}}(\text{BF}_4)_2$ ) obtained from the reaction of  $[(\text{Py}2\text{ald})\text{Zn}(\text{SePh})]$  ( $2^{\text{Zn}}$ ) with  $\text{PhCH}_2\text{Br}$ , which shows the presence of  $[(\text{Py}2\text{ald})\text{Zn}]^+$  ( $m/z$ : 410.0847, simulated data, orange line; 410.0846, observed data, green line).

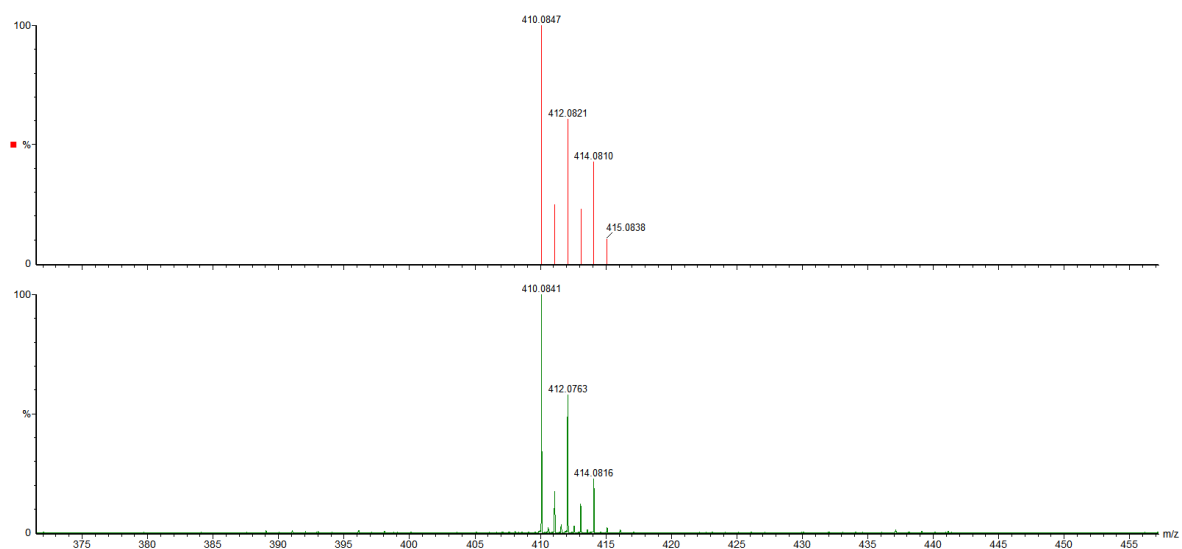

**Figure S112.** Mass spectrometric data (in MeCN) for  $[(\text{Py}2\text{ald})\text{Zn}]_2(\text{BF}_4)_2$  ( $5^{\text{Zn}}(\text{BF}_4)_2$ ) obtained from the reaction of  $[(\text{Py}2\text{ald})\text{Zn}(\text{SePh})]$  ( $2^{\text{Zn}}$ ) with  $\text{MeC}(\text{O})\text{Cl}$  shows the presence of  $[(\text{Py}2\text{ald})\text{Zn}]^+$  ( $m/z$ : 410.0847, simulated data, orange line; 410.0841, observed data, green line).

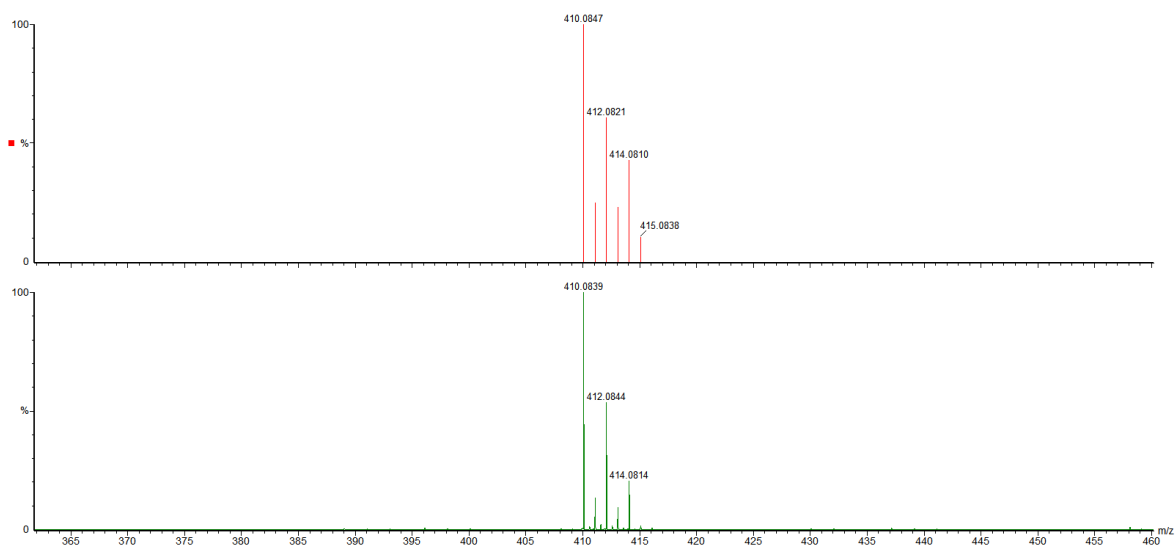

**Figure S113.** Mass spectrometric data (in MeCN) for  $[(\text{Py}2\text{ald})\text{Zn}]_2(\text{BF}_4)_2$  ( $5^{\text{Zn}}(\text{BF}_4)_2$ ) obtained from the reaction of  $[(\text{Py}2\text{ald})\text{Zn}(\text{SePh})]$  ( $2^{\text{Zn}}$ ) with  $\text{PhC}(\text{O})\text{Cl}$ , which shows the presence of  $[(\text{Py}2\text{ald})\text{Zn}]^+$  (m/z: 410.0847, simulated data, orange line; 410.0839, observed data, green line).

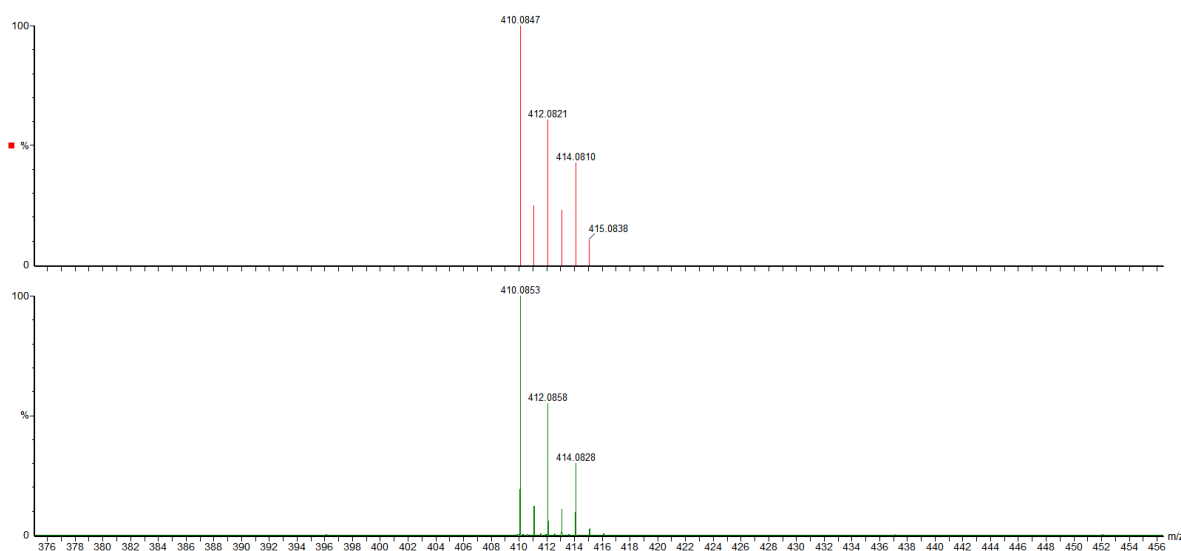

**Figure S114.** Mass spectrometric data (in MeCN) for  $[(\text{Py}2\text{ald})\text{Zn}]_2(\text{BF}_4)_2$  ( $5^{\text{Zn}}(\text{BF}_4)_2$ ) obtained from the reaction of  $[(\text{Py}2\text{ald})\text{Zn}(\text{SePh})]$  ( $2^{\text{Zn}}$ ) with  $\text{CH}_2\text{Br}_2$  shows the presence of  $[(\text{Py}2\text{ald})\text{Zn}]^+$  (m/z: 410.0847, simulated data, orange line; 410.0853, observed data, green line).

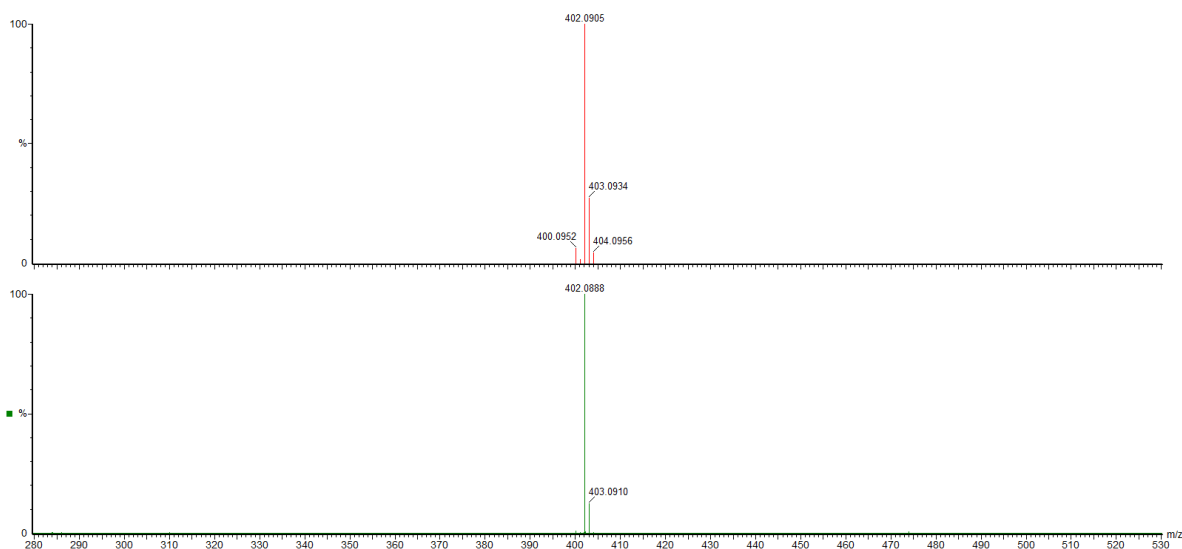

**Figure S115.** Mass spectrometric data (in MeCN) for  $[(\text{Py}2\text{ald})\text{Fe}]_2(\text{BPh}_4)_2$  ( $5^{\text{Fe}}(\text{BPh}_4)_2$ ) obtained from the reaction of  $[(\text{Py}2\text{ald})\text{Fe}(\text{SPh})]$  ( $1\text{a}^{\text{Fe}}$ ) with MeI ((in the presence of 2 equiv of  $\text{NaBPh}_4$ ) shows the presence of  $[(\text{Py}2\text{ald})\text{Fe}]^+$  (m/z: 402.0905, simulated data, orange line; 402.0888, observed data, green line).

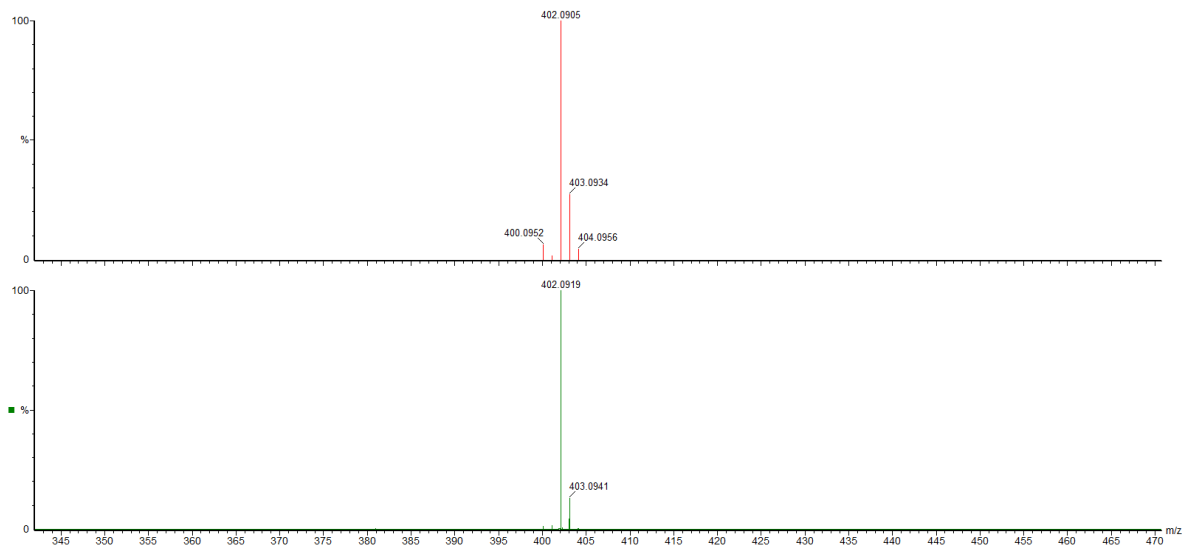

**Figure S116.** Mass spectrometric data (in MeCN) for  $[(\text{Py}2\text{ald})\text{Fe}]_2(\text{BPh}_4)_2$  ( $5^{\text{Fe}}(\text{BPh}_4)_2$ ) obtained from the reaction of  $[(\text{Py}2\text{ald})\text{Fe}(\text{SPh})]$  ( $1\text{a}^{\text{Fe}}$ ) with  $\text{PhCH}_2\text{Br}$  (in the presence of 2 equiv of  $\text{NaBPh}_4$ ) shows the presence of  $[(\text{Py}2\text{ald})\text{Fe}]^+$  (m/z: 402.0905, simulated data, green line; 402.0919, observed data, orange line).

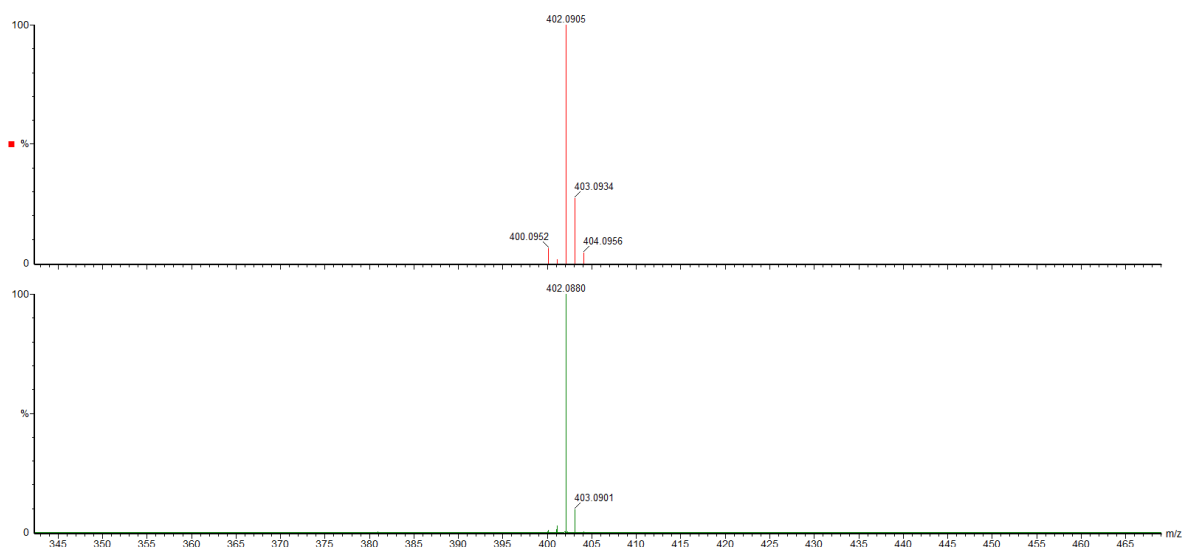

**Figure S117.** Mass spectrometric data (in MeCN) for  $[(\text{Py}2\text{ald})\text{Fe}]_2(\text{BPh}_4)_2$  ( $5^{\text{Fe}}(\text{BPh}_4)_2$ ) obtained from the reaction of  $[(\text{Py}2\text{ald})\text{Fe}(\text{SPh})]$  ( $1\text{a}^{\text{Fe}}$ ) with  $\text{MeC}(\text{O})\text{Cl}$  (in the presence of 2 equiv of  $\text{NaBPh}_4$ ) shows the presence of  $[(\text{Py}2\text{ald})\text{Fe}]^+$  ( $m/z$ : 402.0905, simulated data, orange line; 402.0880, observed data, green line).

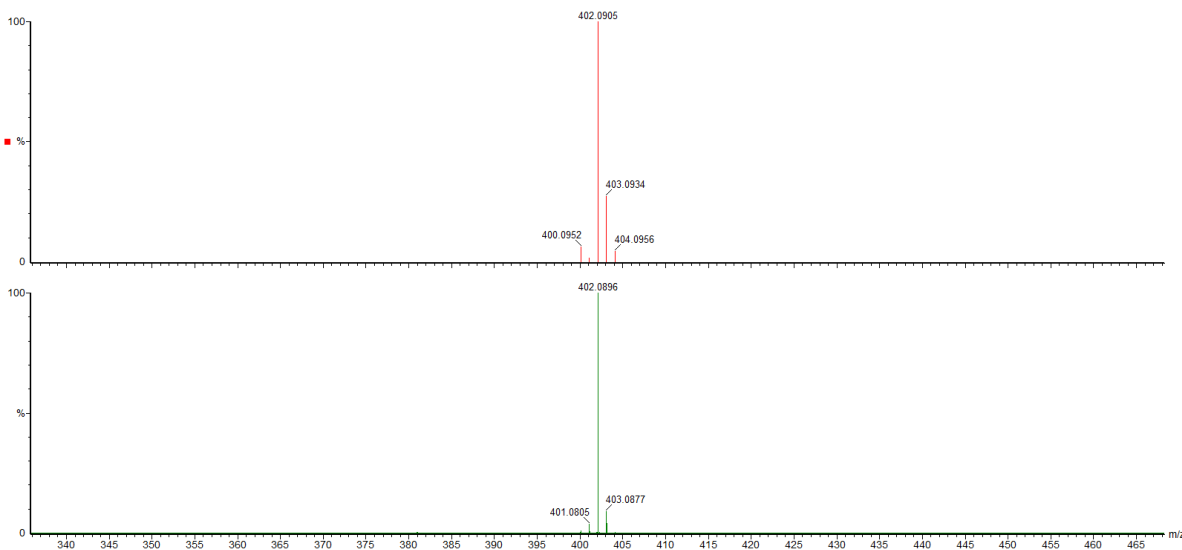

**Figure S118.** Mass spectrometric data (in MeCN) for  $[(\text{Py}2\text{ald})\text{Fe}]_2(\text{BPh}_4)_2$  ( $5^{\text{Fe}}(\text{BPh}_4)_2$ ) obtained from the reaction of  $[(\text{Py}2\text{ald})\text{Fe}(\text{SPh})]$  ( $1\text{a}^{\text{Fe}}$ ) with  $\text{PhC}(\text{O})\text{Cl}$  (in the presence of 2 equiv of  $\text{NaBPh}_4$ ) shows the presence of  $[(\text{Py}2\text{ald})\text{Fe}]^+$  ( $m/z$ : 402.0905, simulated data, orange line; 402.0896, observed data, green line).

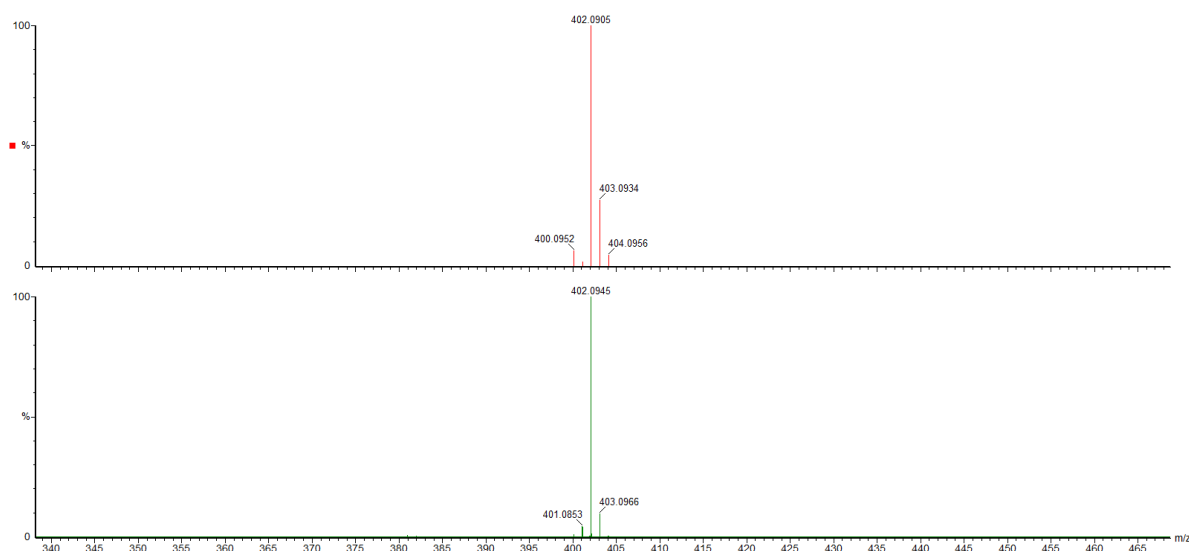

**Figure S119.** Mass spectrometric data (in MeCN) for  $[(\text{Py}2\text{ald})\text{Fe}]_2(\text{BPh}_4)_2$  ( $5^{\text{Fe}}(\text{BPh}_4)_2$ ) obtained from the reaction of  $[(\text{Py}2\text{ald})\text{Fe}(\text{SPh})]$  ( $1\text{a}^{\text{Fe}}$ ) with  $\text{CH}_2\text{Br}_2$  (in the presence of 2 equiv of  $\text{NaBPh}_4$ ) shows the presence of  $[(\text{Py}2\text{ald})\text{Fe}]^+$  (m/z: 402.0905, simulated data, orange line; 402.0945, observed data, green line).

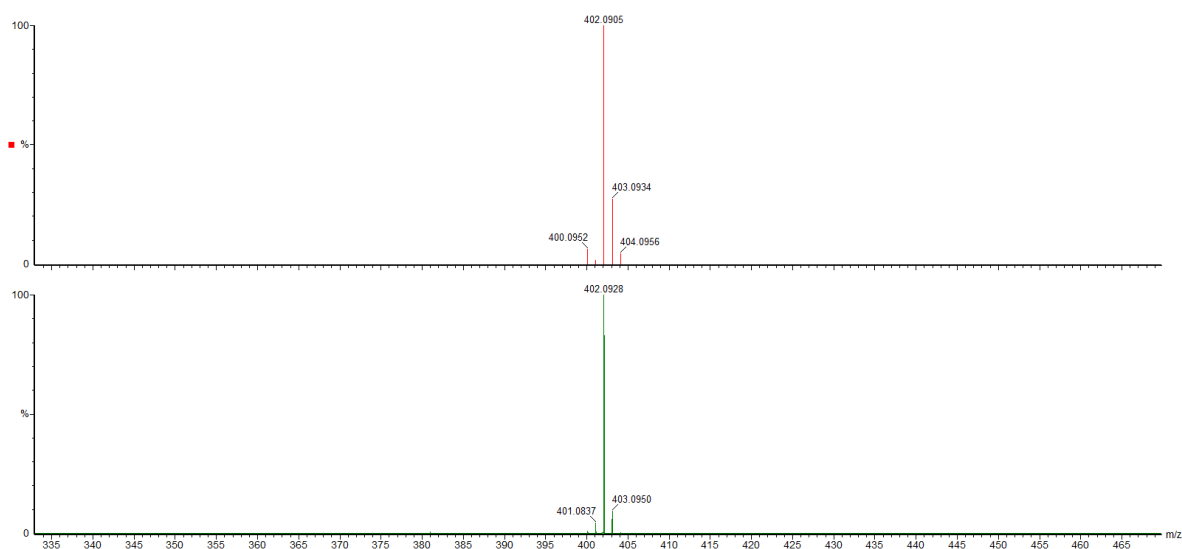

**Figure S120.** Mass spectrometric data (in MeCN) for  $[(\text{Py}2\text{ald})\text{Fe}]_2(\text{BPh}_4)_2$  ( $5^{\text{Fe}}(\text{BPh}_4)_2$ ) obtained from the reaction of  $[(\text{Py}2\text{ald})\text{Fe}(\text{SePh})]$  ( $2^{\text{Fe}}$ ) with  $\text{MeI}$  (in the presence of 2 equiv of  $\text{NaBPh}_4$ ) shows the presence of  $[(\text{Py}2\text{ald})\text{Fe}]^+$  (m/z: 402.0905, simulated data, orange line; 402.0928, observed data, purple line).

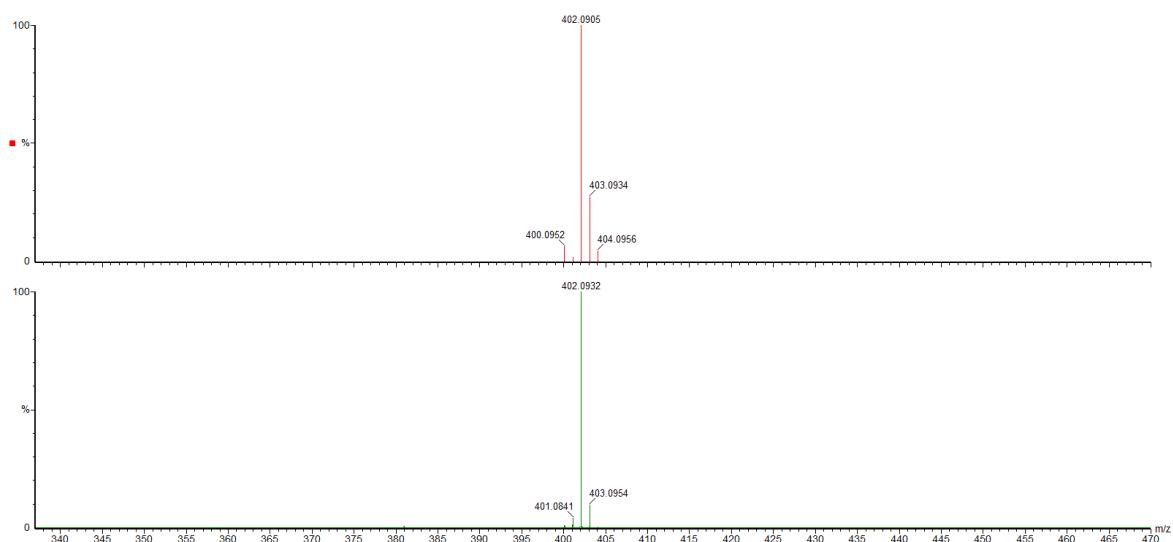

**Figure S121.** Mass spectrometric data (in MeCN) for  $[(\text{Py}2\text{ald})\text{Fe}]_2(\text{BPh}_4)_2$  ( $5^{\text{Fe}}(\text{BPh}_4)_2$ ) obtained from the reaction of  $[(\text{Py}2\text{ald})\text{Fe}(\text{SePh})]$  ( $2^{\text{Fe}}$ ) with  $\text{PhCH}_2\text{Br}$  (in the presence of 2 equiv of  $\text{NaBPh}_4$ ) shows the presence of  $[(\text{Py}2\text{ald})\text{Fe}]^+$  ( $m/z$ : 402.0905, simulated data, orange line; 402.0932, observed data, green line).

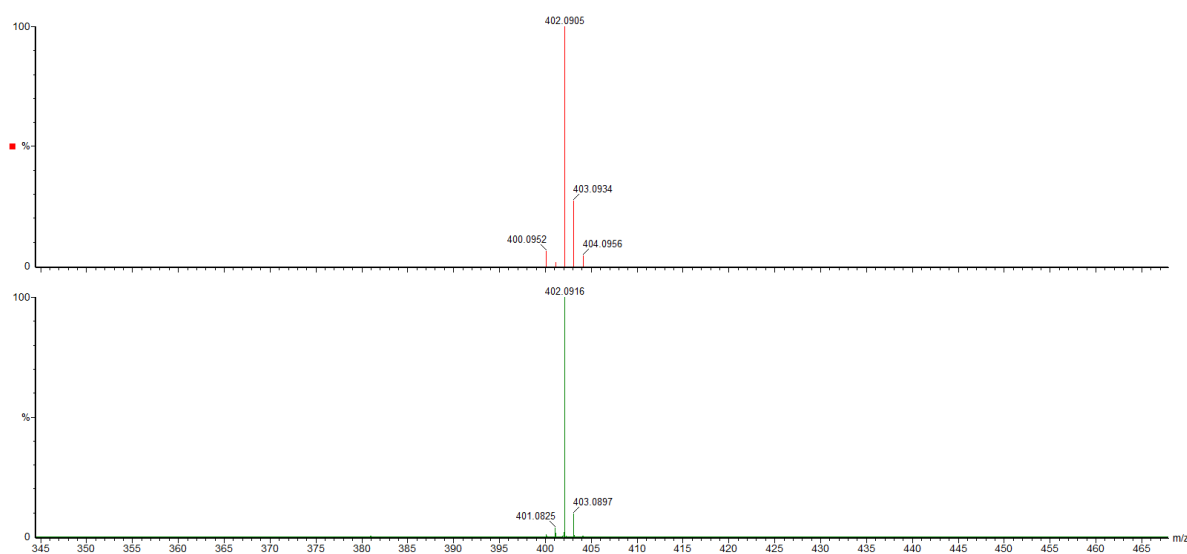

**Figure S122.** Mass spectrometric data (in MeCN) for  $[(\text{Py}2\text{ald})\text{Fe}]_2(\text{BPh}_4)_2$  ( $5^{\text{Fe}}(\text{BPh}_4)_2$ ) obtained from the reaction of  $[(\text{Py}2\text{ald})\text{Fe}(\text{SePh})]$  ( $2^{\text{Fe}}$ ) with  $\text{MeC}(\text{O})\text{Cl}$  (in the presence of 2 equiv of  $\text{NaBPh}_4$ ) shows the presence of  $[(\text{Py}2\text{ald})\text{Fe}]^+$  ( $m/z$ : 402.0916, simulated data, orange line; 402.0901, observed data, green line).

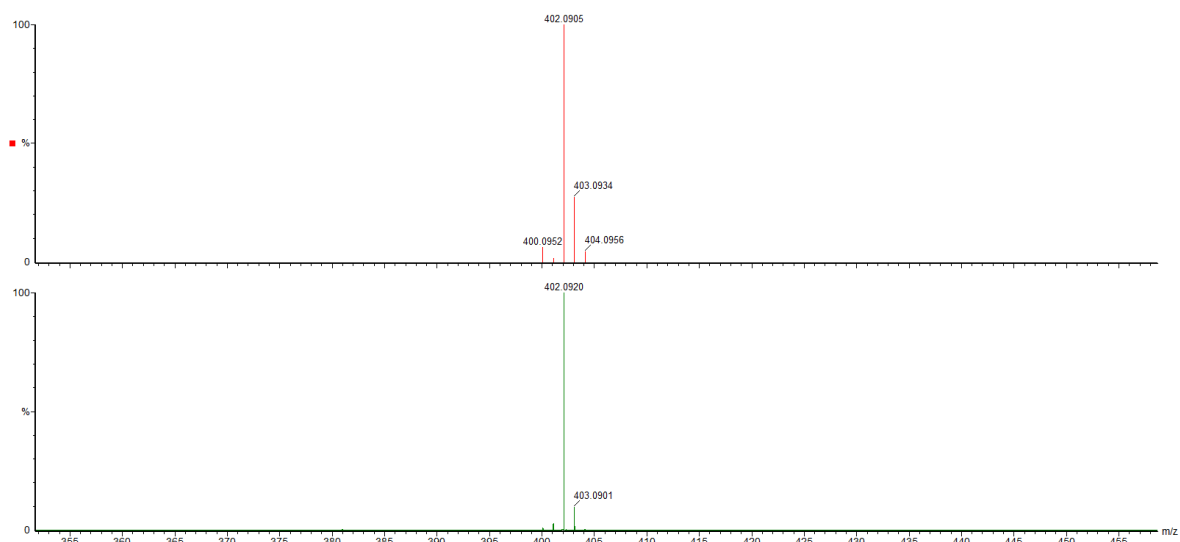

**Figure S123.** Mass spectrometric data (in MeCN) for  $[(\text{Py}2\text{ald})\text{Fe}]_2(\text{BPh}_4)_2$  ( $5^{\text{Fe}}(\text{BPh}_4)_2$ ) obtained from the reaction of  $[(\text{Py}2\text{ald})\text{Fe}(\text{SePh})]$  ( $2^{\text{Fe}}$ ) with  $\text{PhC}(\text{O})\text{Cl}$  (in the presence of 2 equiv of  $\text{NaBPh}_4$ ) shows the presence of  $[(\text{Py}2\text{ald})\text{Fe}]^+$  ( $m/z$ : 402.0905, simulated data, orange line; 402.0920, observed data, green line).

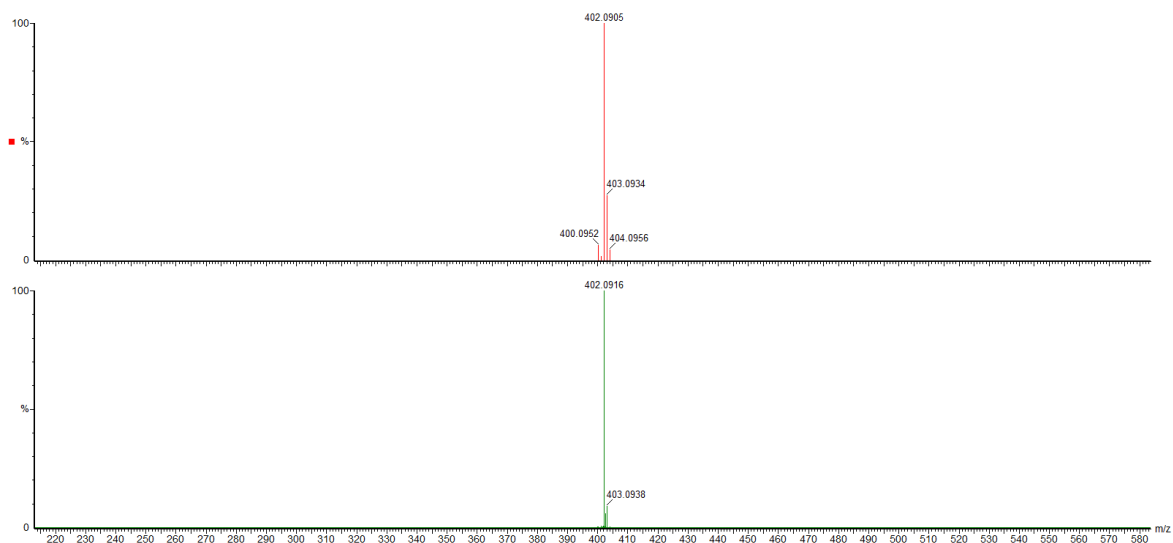

**Figure S124.** Mass spectrometric data (in MeCN) for  $[(\text{Py}2\text{ald})\text{Fe}]_2(\text{BPh}_4)_2$  ( $5^{\text{Fe}}(\text{BPh}_4)_2$ ) obtained from the reaction of  $[(\text{Py}2\text{ald})\text{Fe}(\text{SePh})]$  ( $2^{\text{Fe}}$ ) with  $\text{CH}_2\text{Br}_2$  (in the presence of 2 equiv of  $\text{NaBPh}_4$ ) shows the presence of  $[(\text{Py}2\text{ald})\text{Fe}]^+$  ( $m/z$ : 402.0905, simulated data, orange line; 402.0916, observed data, green line).



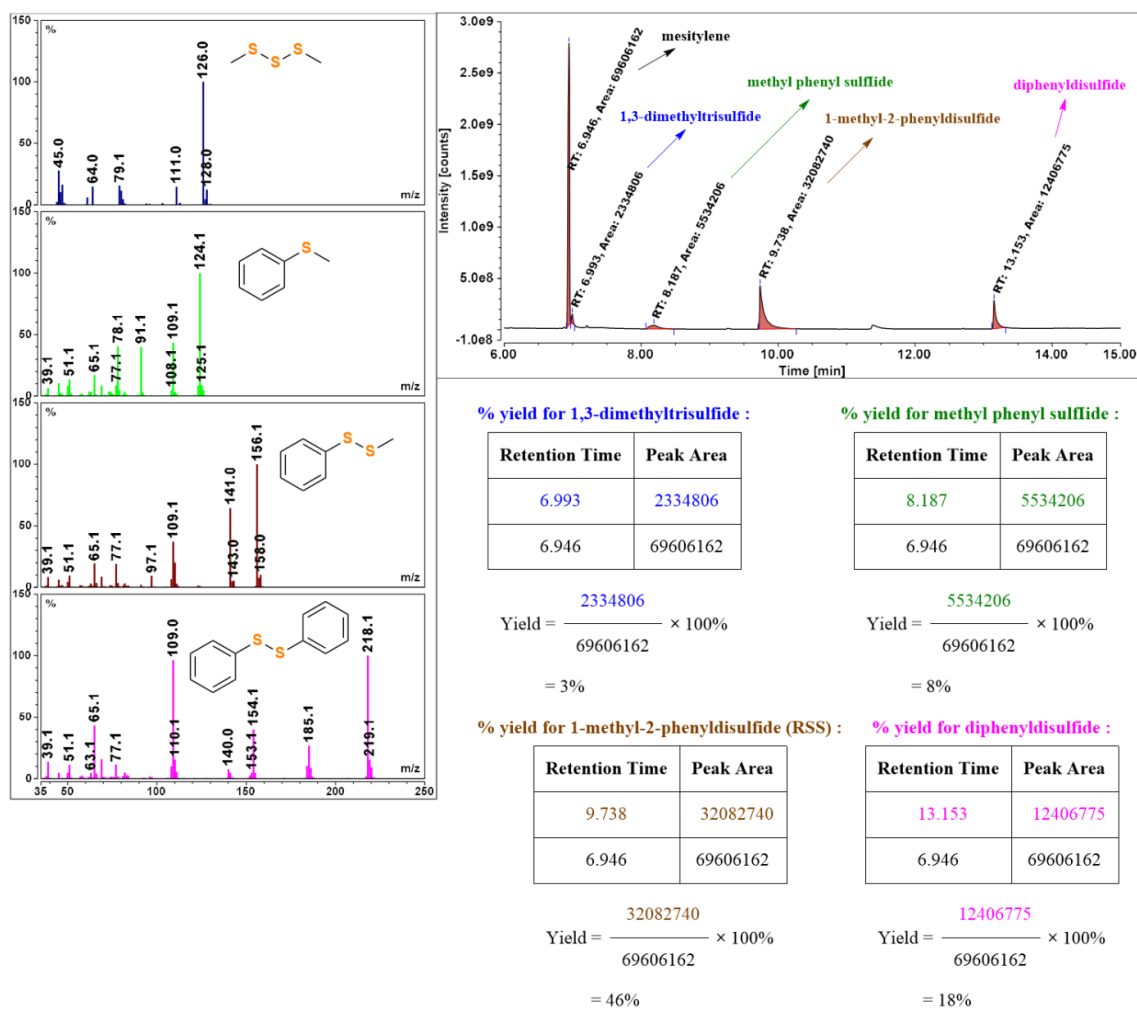

**Figure S125.** GC-MS data for the identification and yield calculation of 1-methyl-2-phenyldisulfide (Me-S-S-Ph, yield = 46%) produced in the reaction of [(Py2ald)Zn(SPh)] (**1a<sup>Zn</sup>**) with S<sub>8</sub> and MeI.

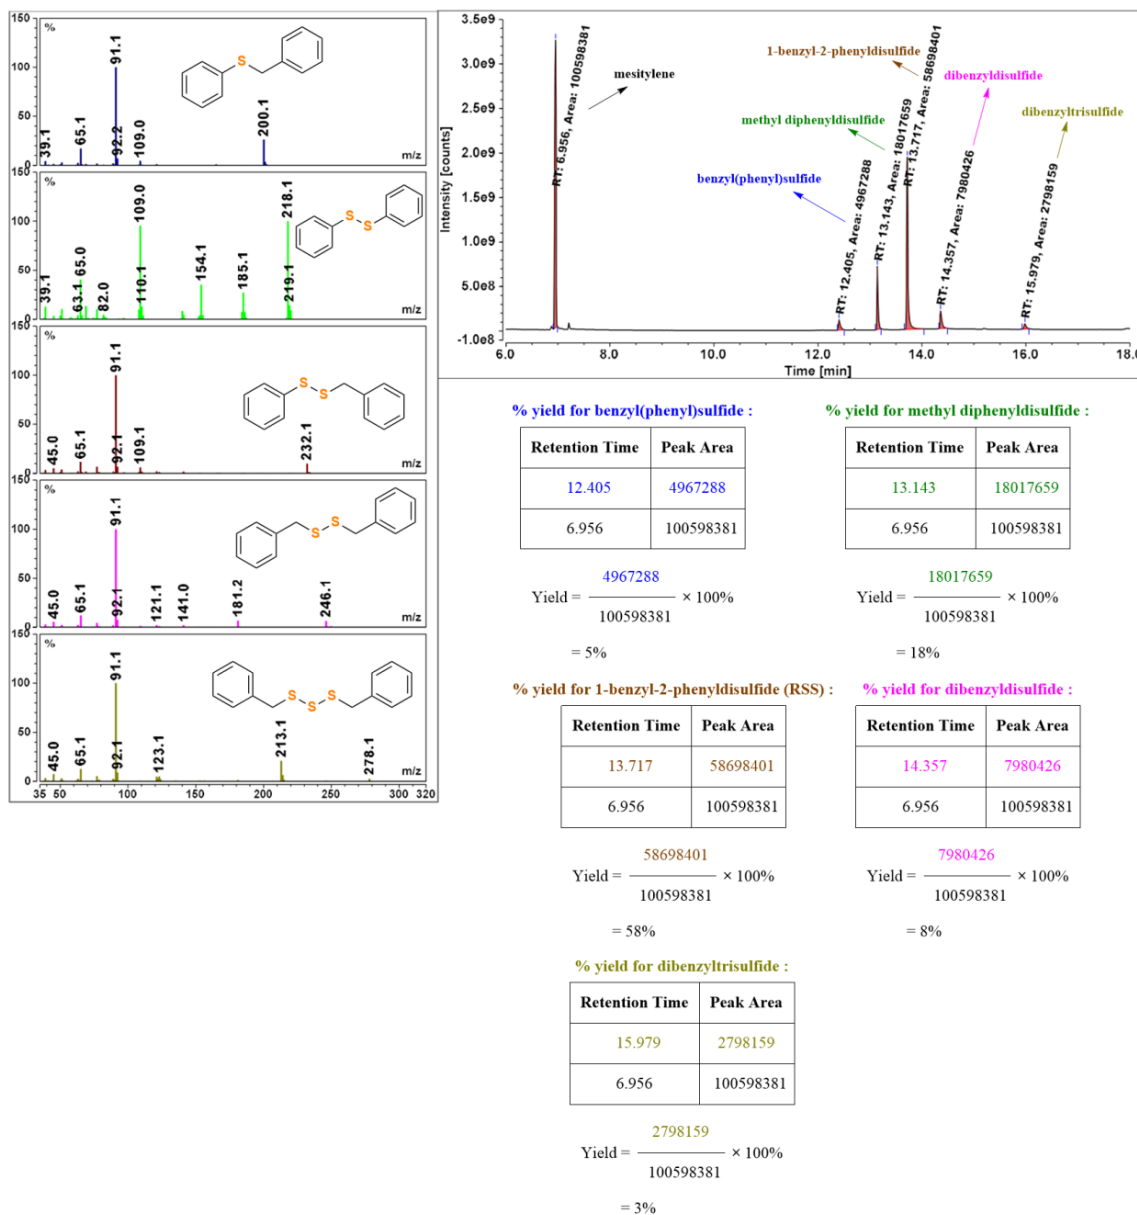

**Figure S126.** Gas chromatographic data for the identification and yield calculation of 1-benzyl-2-phenyldisulfide ( $\text{PhCH}_2\text{-S-S-Ph}$ , yield = 58%) produced in the reaction of  $[(\text{Py}2\text{ald})\text{Zn}(\text{SPh})]$  ( $1\text{a}^{\text{Zn}}$ ) with  $\text{S}_8$  and  $\text{PhCH}_2\text{Br}$  in 1:1 ratio.

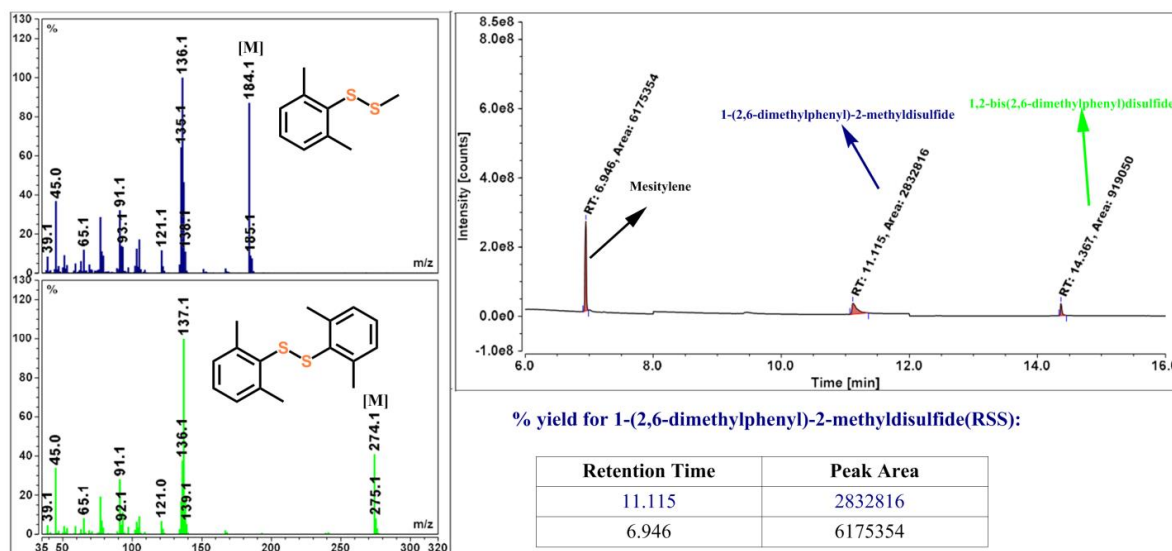

$$\text{Yield} = \frac{2832816}{6175354} \times 100\% = 46\%$$

**% yield for 1,2-bis(2,6-dimethylphenyl)disulfide:**

| Retention Time | Peak Area |
|----------------|-----------|
| 14.367         | 919050    |
| 6.946          | 6175354   |

$$\text{Yield} = \frac{919050}{6175354} \times 100\% = 15\%$$

**Figure S127.** GC-MS data for the identification and yield calculation of 1-(2,6-dimethylphenyl)-2-methyldisulfide (Me-S-S-2,6-Me<sub>2</sub>-C<sub>6</sub>H<sub>4</sub>, yield = 46%) produced in the reaction of [(Py2ald)Zn(SC<sub>6</sub>H<sub>4</sub>-2,6-Me<sub>2</sub>)] (**1b**<sup>Zn</sup>) with S<sub>8</sub> and MeI.

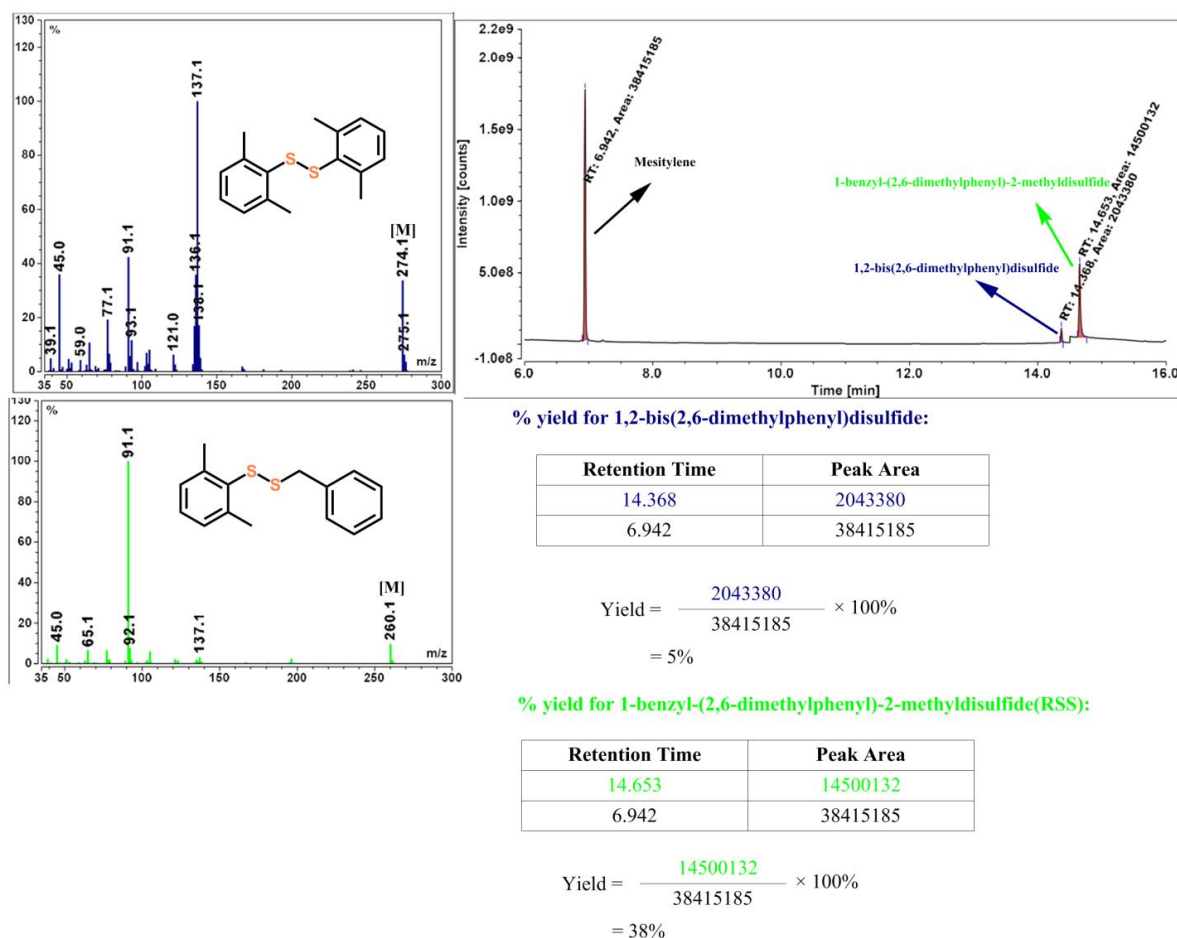

**Figure S128.** GC-MS data for the identification and yield calculation of 1-benzyl-(2,6-dimethylphenyl)-2-methyldisulfide ( $\text{PhCH}_2\text{-S-S-2,6-Me}_2\text{-C}_6\text{H}_4$ , yield = 38%) produced in the reaction of  $[(\text{Py}_2\text{ald})\text{Zn}(\text{SC}_6\text{H}_4\text{-2,6-Me}_2)]$  ( $\mathbf{1b}^{\text{Zn}}$ ) with  $\text{S}_8$  and  $\text{PhCH}_2\text{Br}$ .

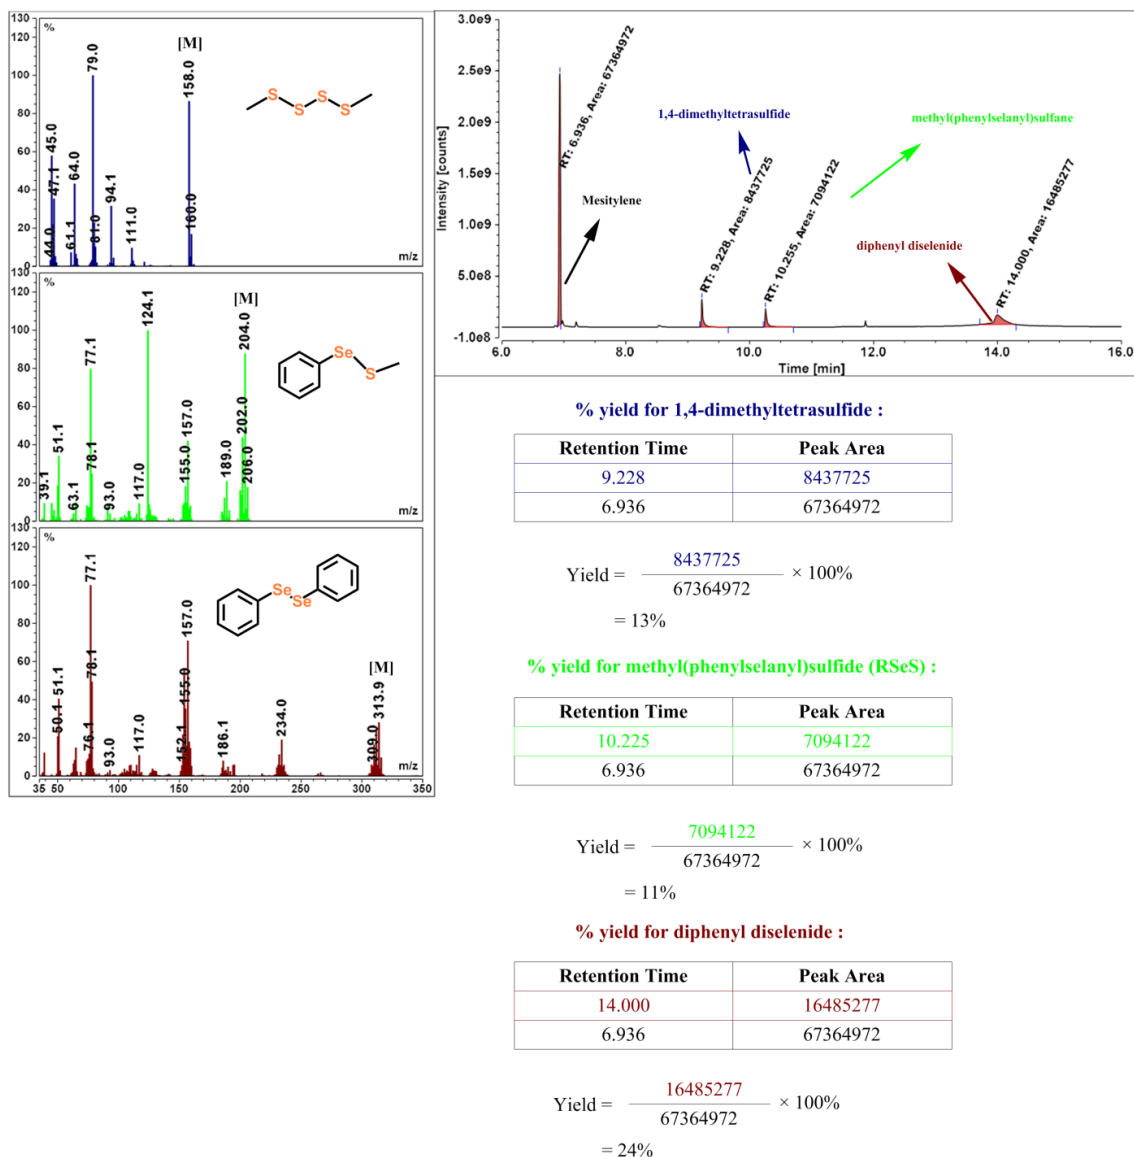

**Figure S129.** GC-MS data for the identification and yield calculation of methyl(phenylselanyl)sulfide (Me-S-Se-Ph, yield = 11%) produced in the reaction of [(Py2ald)Zn(SePh)] ( $2^{\text{Zn}}$ ) with  $\text{S}_8$  and MeI.

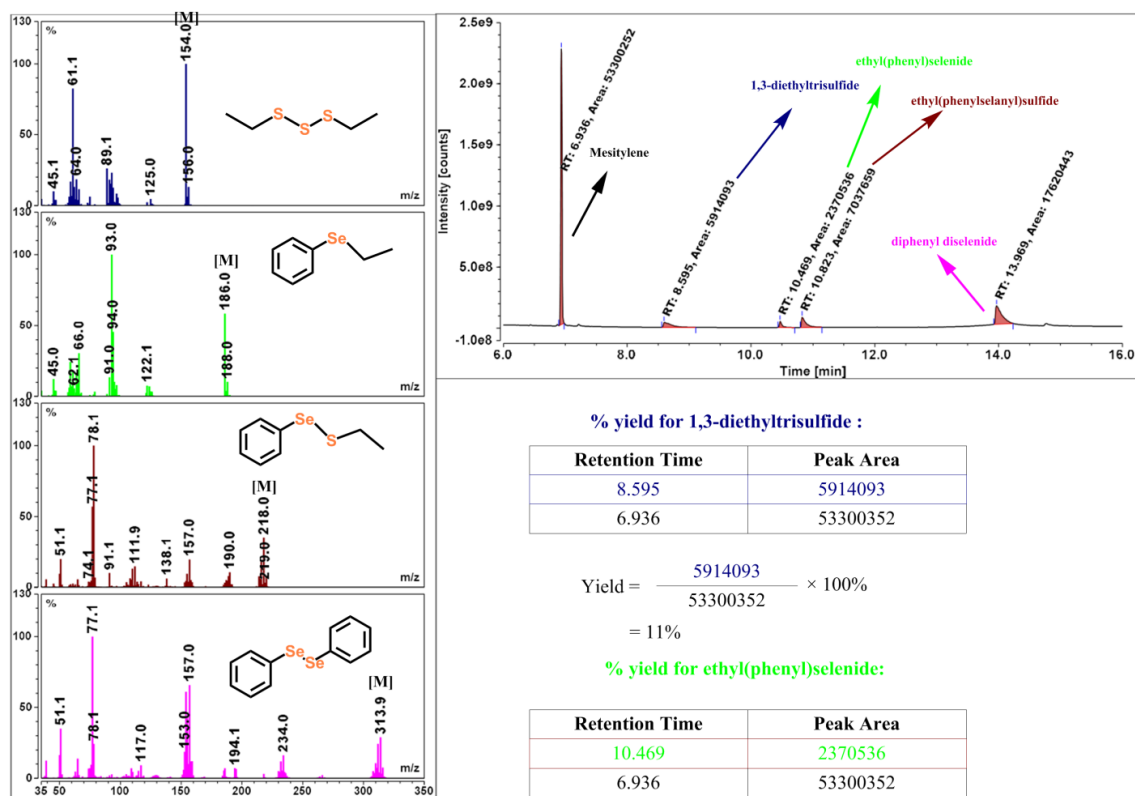

**Figure S130.** GC-MS data for the identification and yield calculation of ethyl(phenylselanyl)sulfide (Et-S-Se-Ph, yield = 13%) produced in the reaction of [(Py2ald)Zn(SePh)] ( $2^{\text{Zn}}$ ) with  $\text{S}_8$  and EtBr.

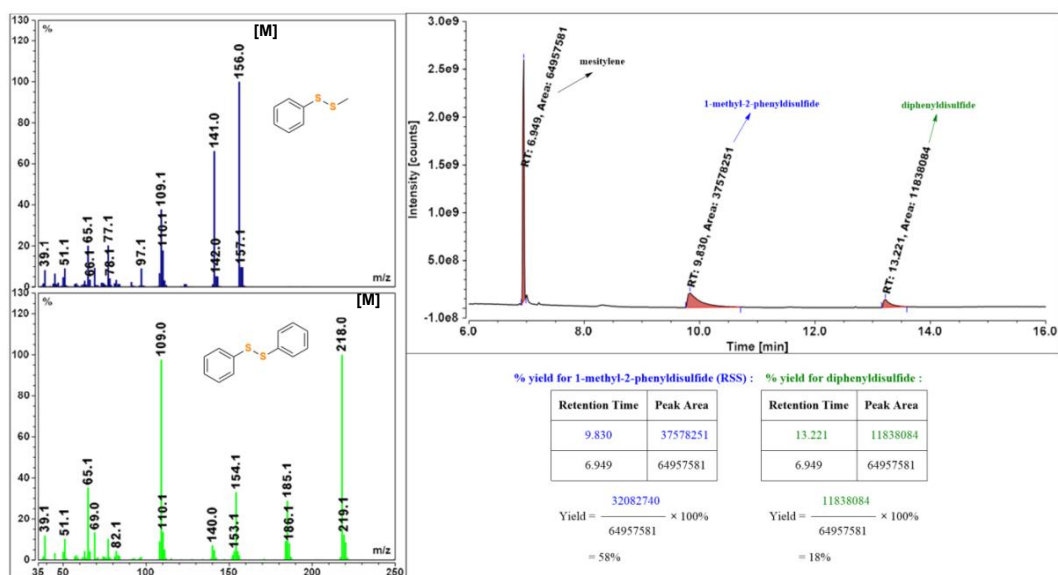

**Figure S131.** GC-MS data for the identification and yield calculation of 1-methyl-2-phenyldisulfide (Me-S-S-Ph, yield = 58%) produced in the reaction of [(Py2ald)Fe(SPh)] ( $1a^{Fe}$ ) with  $S_8$  and MeI.

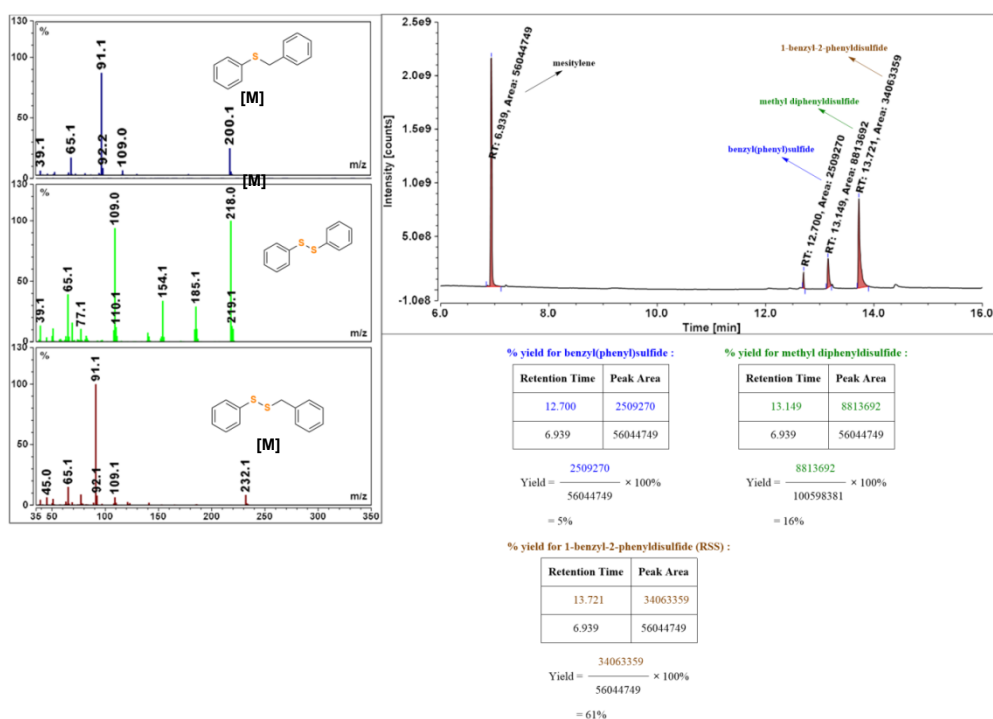

**Figure S132.** GC-MS data for the identification and yield calculation of 1-benzyl-2-phenyldisulfide (PhCH<sub>2</sub>-S-S-Ph, yield = 61%) produced in the reaction of [(Py2ald)Fe(SPh)] ( $1a^{Fe}$ ) with  $S_8$  and PhCH<sub>2</sub>Br.

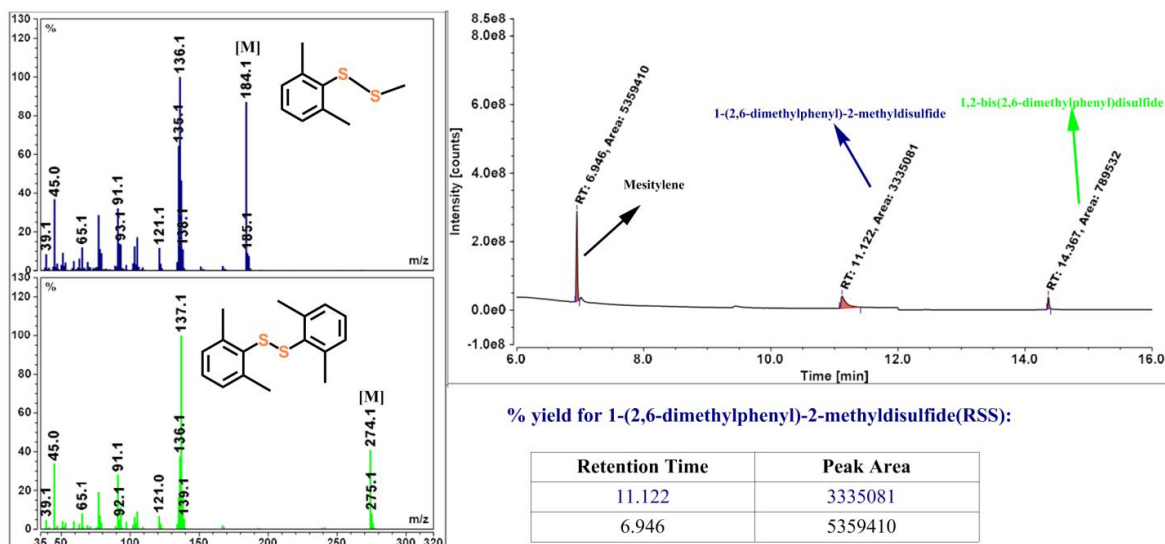

**Figure S133.** GC-MS data for the identification and yield calculation of 1-(2,6-dimethylphenyl)-2-methyldisulfide (Me-S-S-2,6-Me<sub>2</sub>-C<sub>6</sub>H<sub>4</sub>, yield = 62%) produced in the reaction of [(Py2ald)Fe(SC<sub>6</sub>H<sub>4</sub>-2,6-Me<sub>2</sub>)] (**1b**<sup>Fe</sup>) with S<sub>8</sub> and MeI.



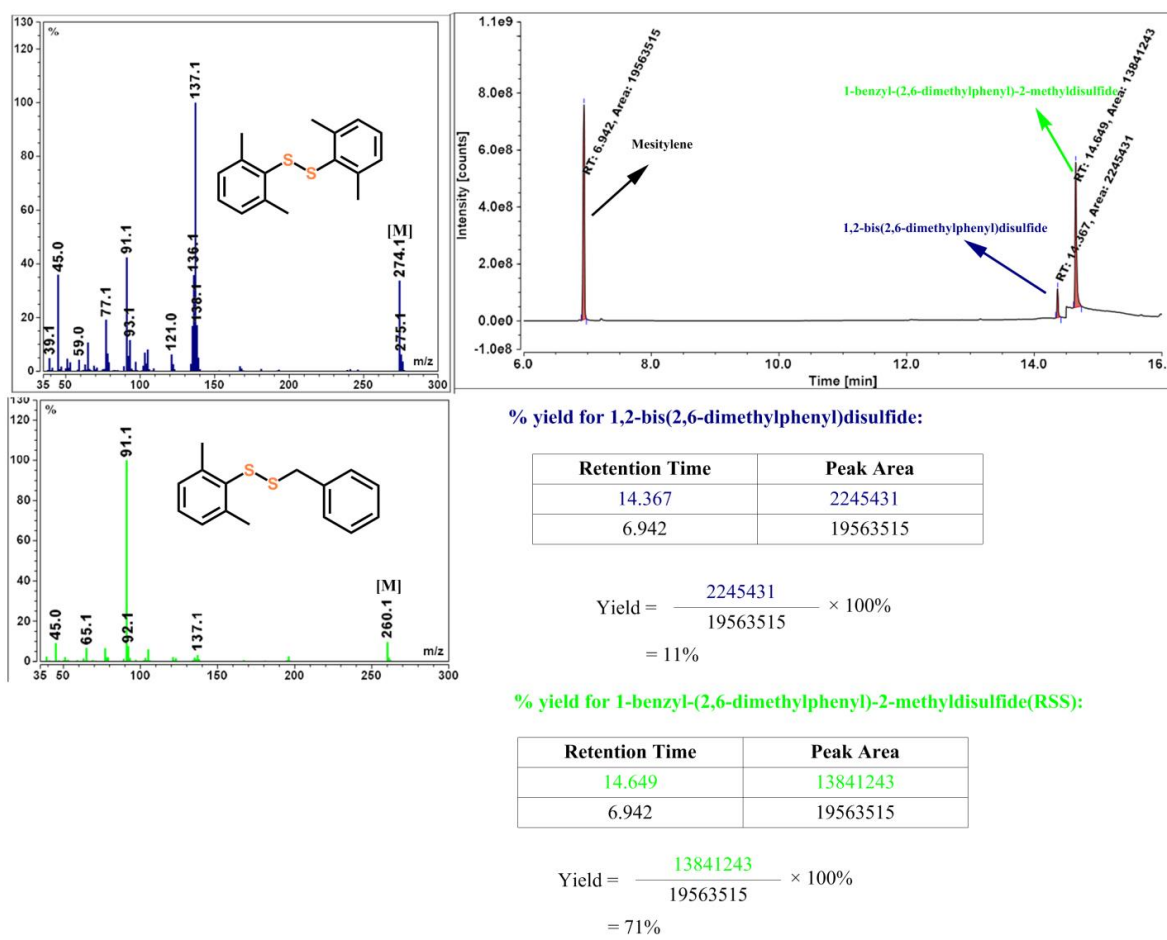

**Figure S134.** GC-MS data for the identification and yield calculation of 1-benzyl-(2,6-dimethylphenyl)-2-methyldisulfide ( $\text{PhCH}_2\text{-S-S-2,6-Me}_2\text{-C}_6\text{H}_4$ , yield = 71%) produced in the reaction of  $[(\text{Py}_2\text{ald})\text{Fe}(\text{SC}_6\text{H}_4\text{-2,6-Me}_2)]$  ( $\mathbf{1b}^{\text{Fe}}$ ) with  $\text{S}_8$  and  $\text{PhCH}_2\text{Br}$ .

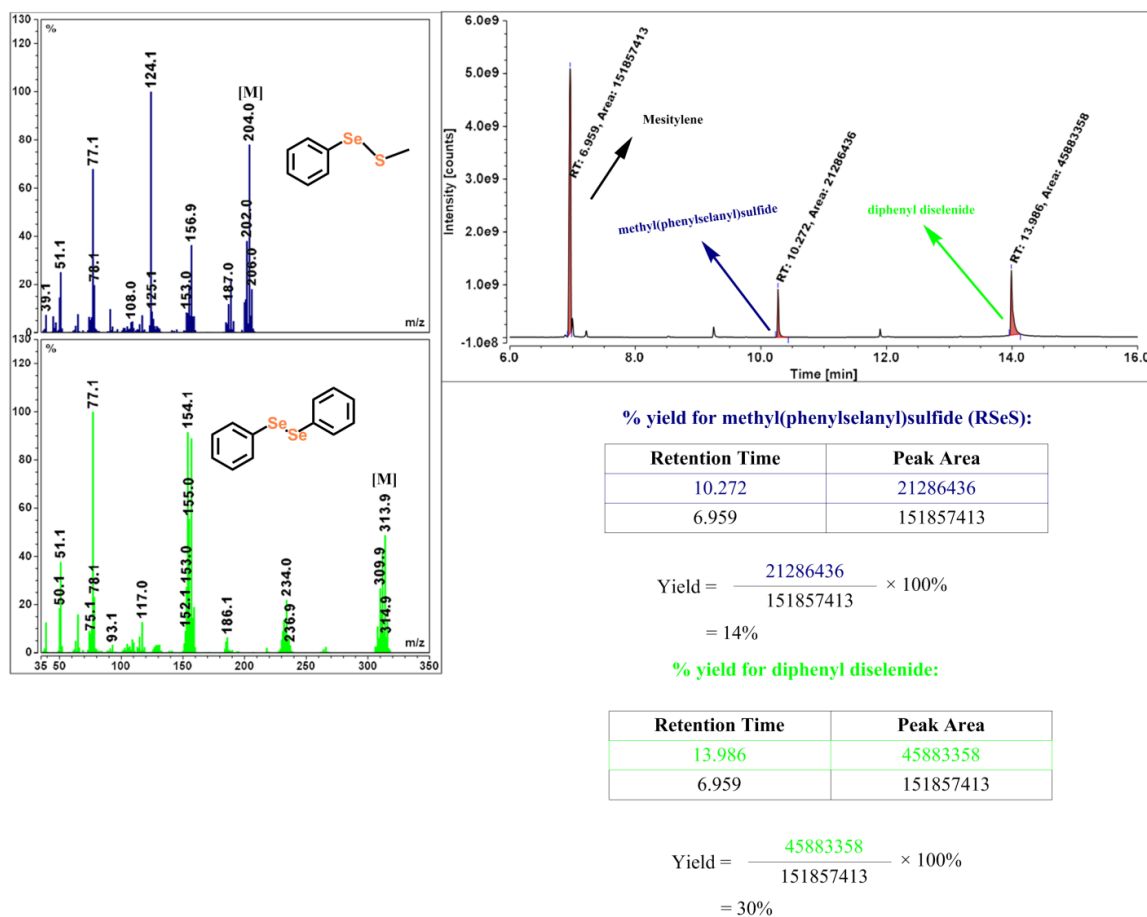

**Figure S135.** GC-MS data for the identification and yield calculation of methyl(phenylselanyl)sulfide (Me-S-Se-Ph, yield = 14%) produced in the reaction of [(Py2ald)Fe(SePh)] (2<sup>Fe</sup>) with S<sub>8</sub> and MeI.

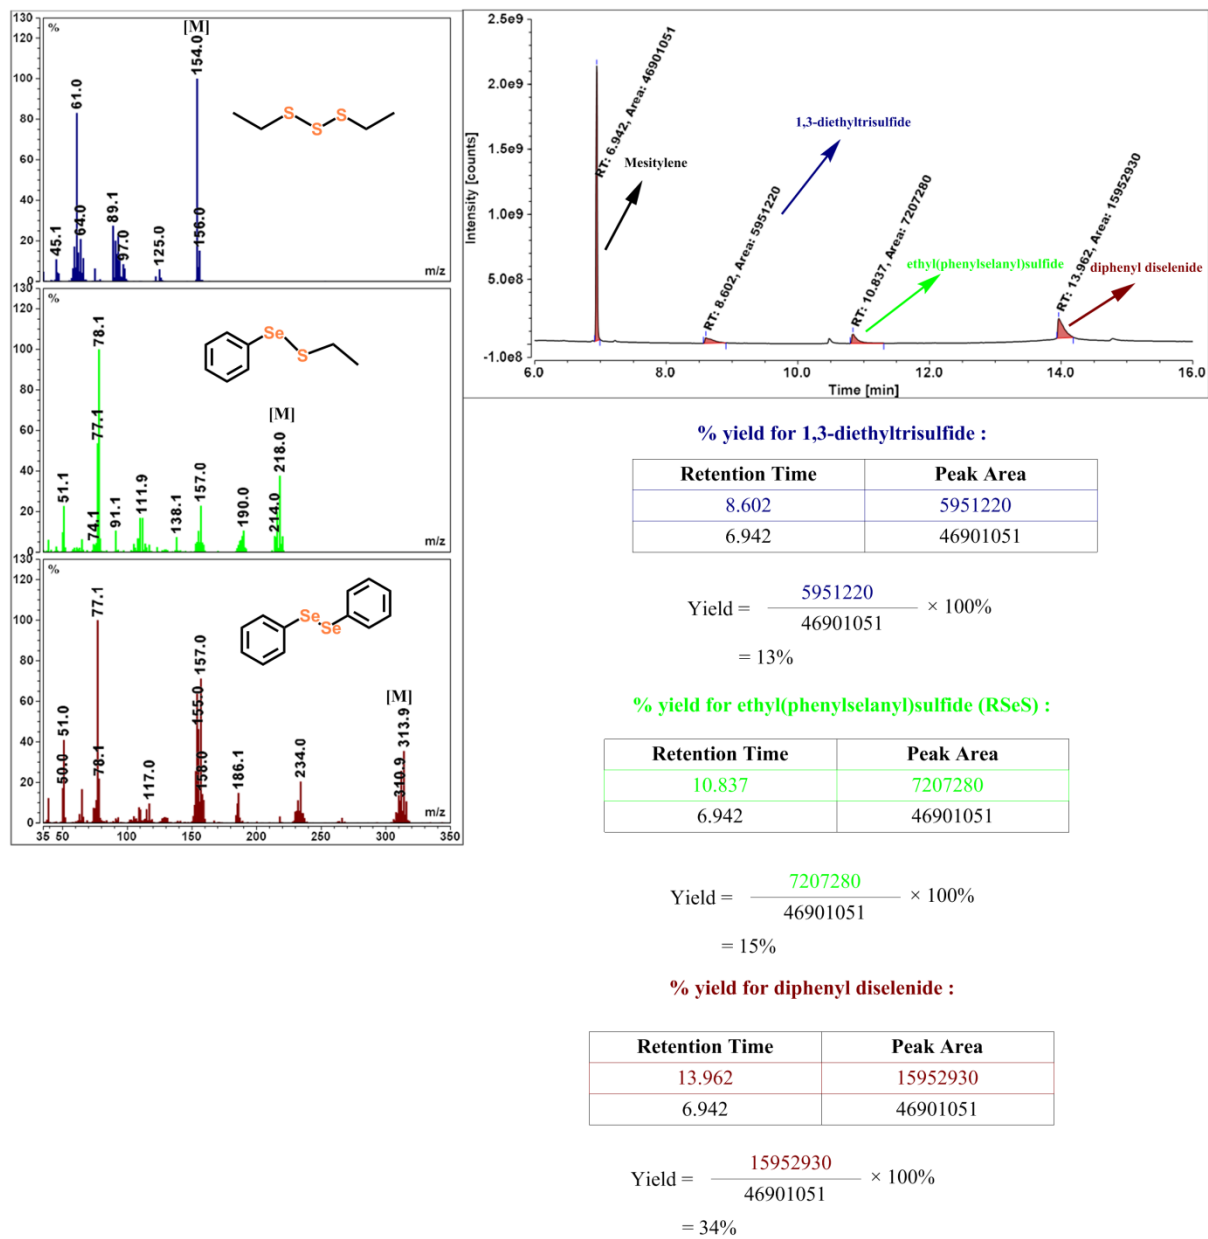

**Figure S136.** Gas chromatographic data for the identification and yield calculation of ethyl(phenylselanyl)sulfide (Et-S-Se-Ph, yield = 15%) produced in the reaction of [(Py2ald)Fe(SePh)] (2<sup>Fe</sup>) with S<sub>8</sub> and EtBr.

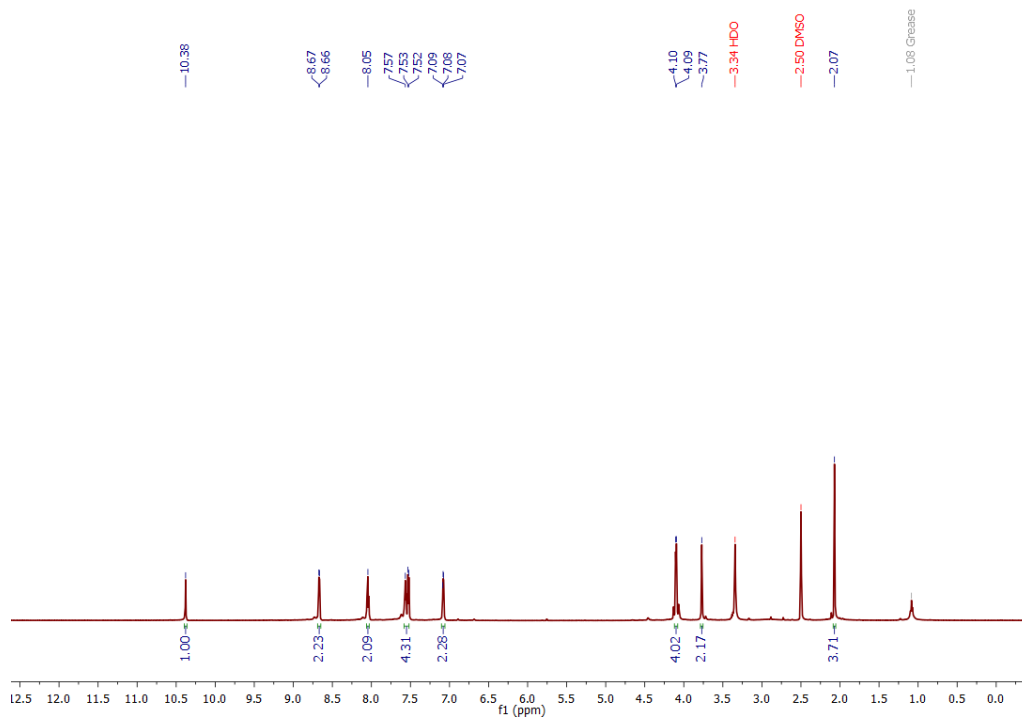

**Figure S137.**  $^1\text{H}$  NMR (600 MHz,  $\text{DMSO-d}_6$ ) spectrum of  $[(\text{Py}2\text{ald})\text{Zn}]_2(\text{BF}_4)_2$  ( $5^{\text{Zn}}(\text{BF}_4)_2$ ) obtained from the reaction of  $[(\text{Py}2\text{ald})\text{Zn}(\text{SPh})]$  ( $1\text{a}^{\text{Zn}}$ ) with  $\text{S}_8$  and  $\text{MeI}$ .

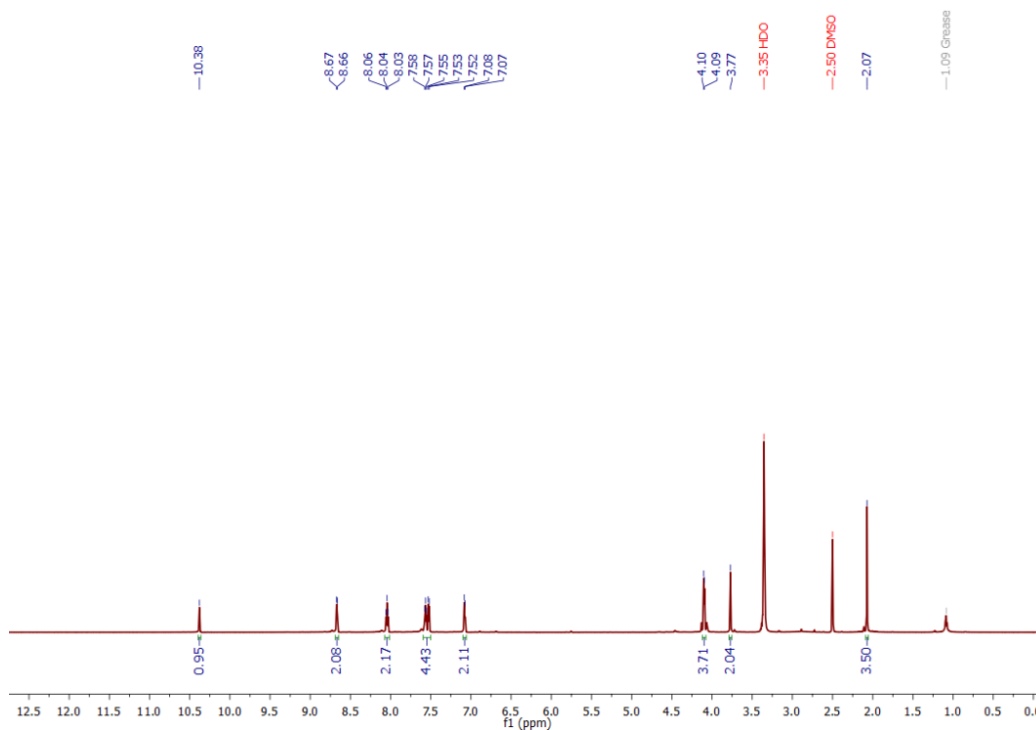

**Figure S138.**  $^1\text{H}$  NMR (600 MHz,  $\text{DMSO-d}_6$ ) spectrum of  $[(\text{Py}2\text{ald})\text{Zn}]_2(\text{BF}_4)_2$  ( $5^{\text{Zn}}(\text{BF}_4)_2$ ) obtained from the reaction of  $[(\text{Py}2\text{ald})\text{Zn}(\text{SPh})]$  ( $1\text{a}^{\text{Zn}}$ ) with  $\text{S}_8$  and  $\text{PhCH}_2\text{Br}$ .

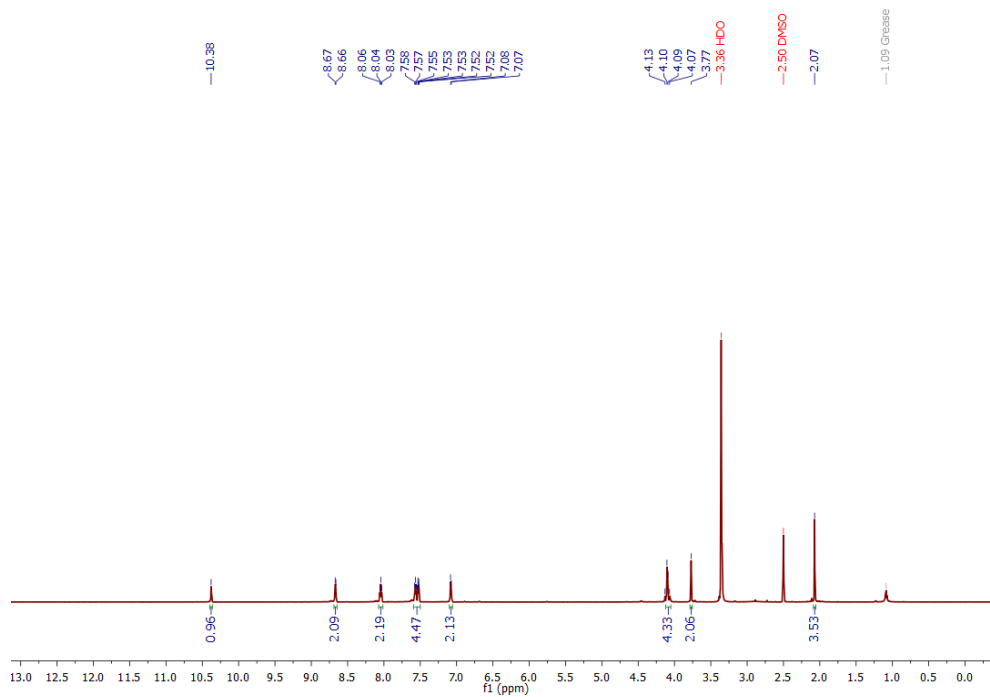

**Figure S139.**  $^1\text{H}$  NMR (600 MHz,  $\text{DMSO-d}_6$ ) spectrum of  $[(\text{Py2ald})\text{Zn}]_2(\text{BF}_4)_2$  ( $5^{\text{Zn}}(\text{BF}_4)_2$ ) obtained from the reaction of  $[(\text{Py2ald})\text{Zn}(\text{SC}_6\text{H}_4\text{-2,6-Me}_2)]$  ( $1\text{b}^{\text{Zn}}$ ) with  $\text{S}_8$  and  $\text{MeI}$ .

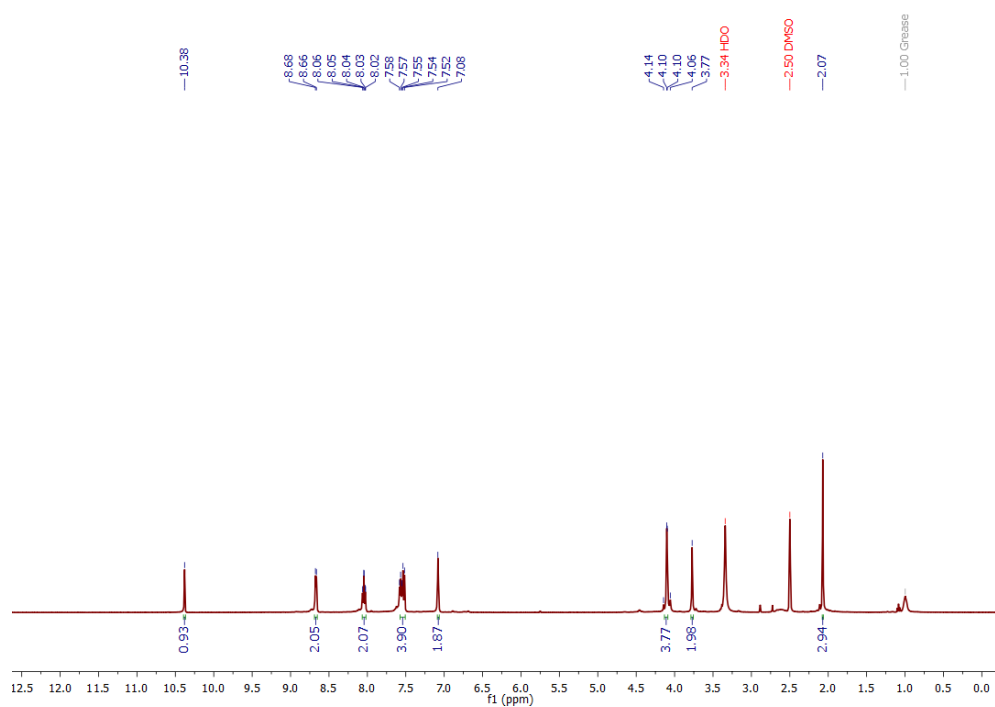

**Figure S140.**  $^1\text{H}$  NMR (400 MHz,  $\text{DMSO-d}_6$ ) spectrum of  $[(\text{Py2ald})\text{Zn}]_2(\text{BF}_4)_2$  ( $5^{\text{Zn}}(\text{BF}_4)_2$ ) obtained from the reaction of  $[(\text{Py2ald})\text{Zn}(\text{SC}_6\text{H}_4\text{-2,6-Me}_2)]$  ( $1\text{b}^{\text{Zn}}$ ) with  $\text{S}_8$  and  $\text{PhCH}_2\text{Br}$ .

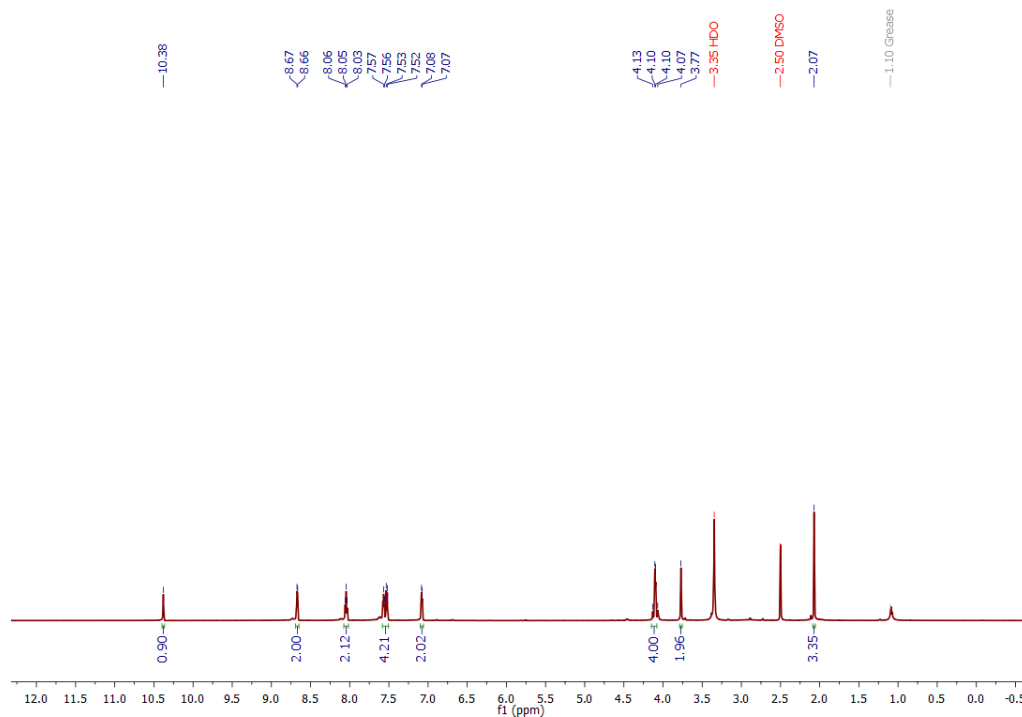

**Figure S141.**  $^1\text{H}$  NMR (600 MHz,  $\text{DMSO-d}_6$ ) spectrum of  $[(\text{Py2ald})\text{Zn}]_2(\text{BF}_4)_2$  ( $5^{\text{Zn}}(\text{BF}_4)_2$ ) obtained from the reaction of  $[(\text{Py2ald})\text{Zn}(\text{SePh})]$  ( $2^{\text{Zn}}$ ) with  $\text{S}_8$  and  $\text{MeI}$ .

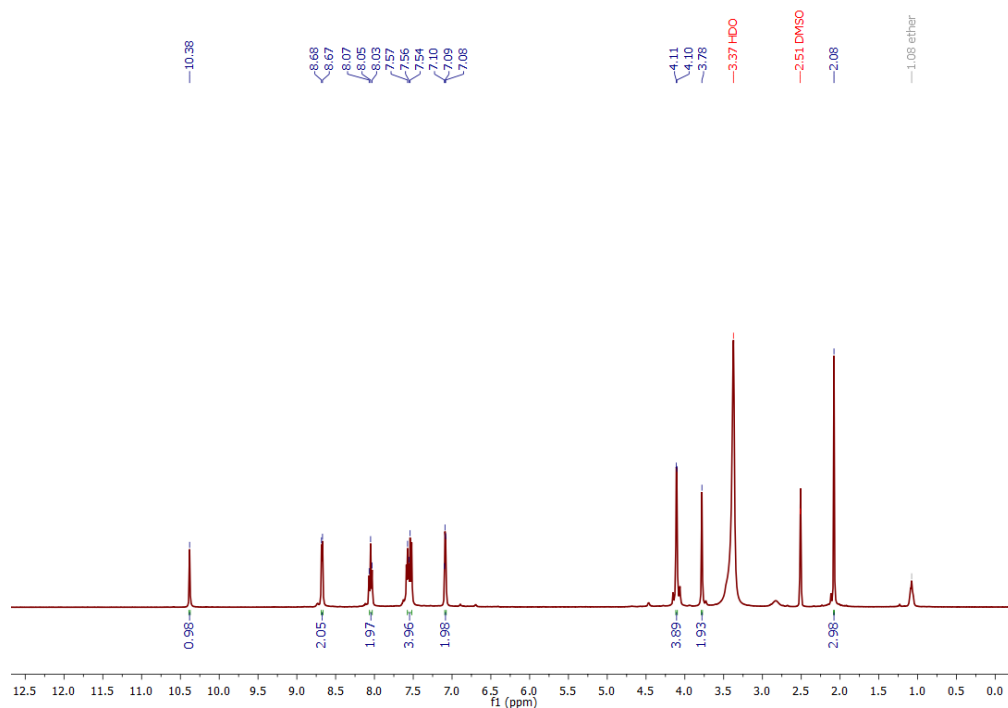

**Figure S142.**  $^1\text{H}$  NMR (400 MHz,  $\text{DMSO-d}_6$ ) spectrum of  $[(\text{Py2ald})\text{Zn}]_2(\text{BF}_4)_2$  ( $5^{\text{Zn}}(\text{BF}_4)_2$ ) obtained from the reaction of  $[(\text{Py2ald})\text{Zn}(\text{SePh})]$  ( $2^{\text{Zn}}$ ) with  $\text{S}_8$  and  $\text{EtBr}$ .

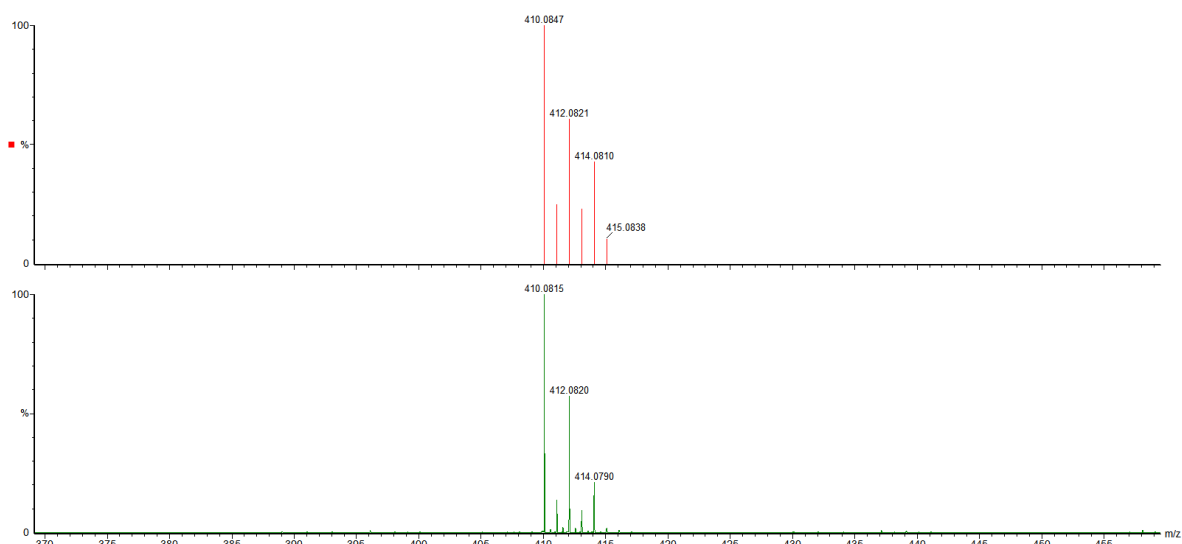

**Figure S143.** Mass spectrometric data (in MeCN) for  $[(\text{Py}2\text{ald})\text{Zn}]_2(\text{BF}_4)_2$  ( $5^{\text{Zn}}(\text{BF}_4)_2$ ) obtained from the reaction of  $[(\text{Py}2\text{ald})\text{Zn}(\text{SPh})]$  ( $1\text{a}^{\text{Zn}}$ ) with  $\text{S}_8$  and MeI shows the presence of  $[(\text{Py}2\text{ald})\text{Zn}]^+$  ( $m/z$ : 410.0847, simulated data, orange line; 410.0815, observed data, green line).

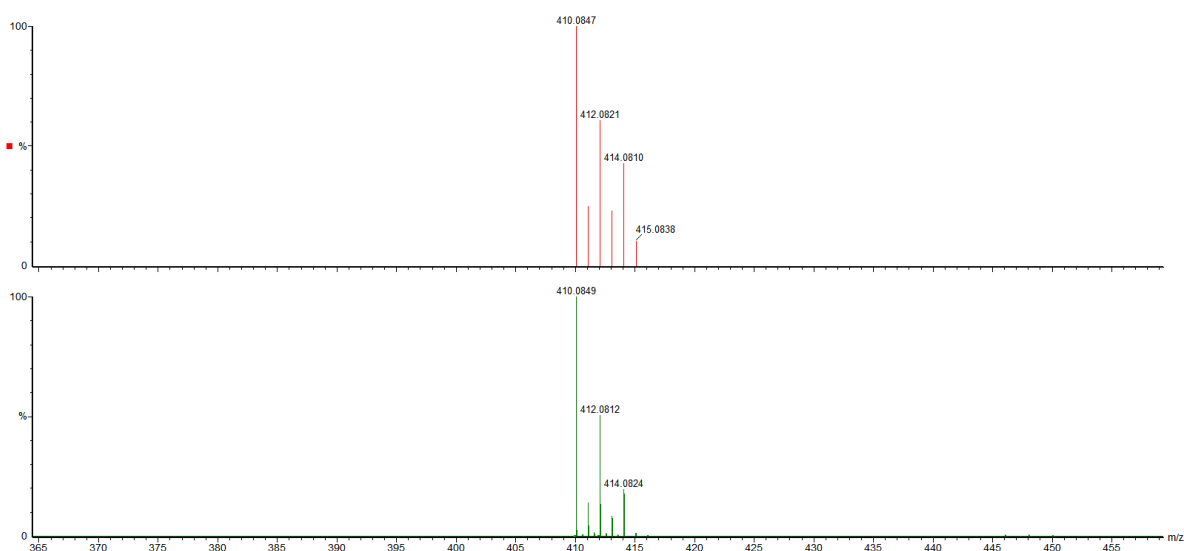

**Figure S144.** Mass spectrometric data (in MeCN) for  $[(\text{Py}2\text{ald})\text{Zn}]_2(\text{BF}_4)_2$  ( $5^{\text{Zn}}(\text{BF}_4)_2$ ) obtained from the reaction of  $[(\text{Py}2\text{ald})\text{Zn}(\text{SPh})]$  ( $1\text{a}^{\text{Zn}}$ )  $\text{S}_8$  and  $\text{PhCH}_2\text{Br}$ , which shows the presence of  $[(\text{Py}2\text{ald})\text{Zn}]^+$  ( $m/z$ : 410.0847, simulated data, orange line; 410.0849, observed data, green line).

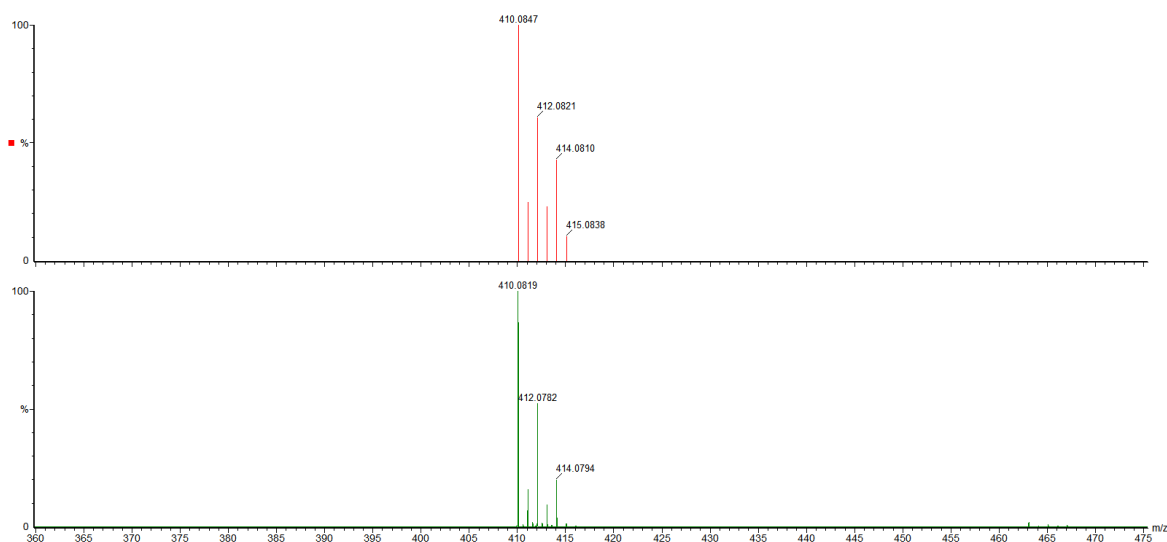

**Figure S145.** Mass spectrometric data (in MeCN) for  $[(\text{Py}2\text{ald})\text{Zn}]_2(\text{BF}_4)_2$  ( $5^{\text{Zn}}(\text{BF}_4)_2$ ) obtained from the reaction of  $[(\text{Py}2\text{ald})\text{Zn}(\text{SC}_6\text{H}_4\text{-}2,6\text{-Me}_2)]$  ( $1\text{b}^{\text{Zn}}$ ) with  $\text{S}_8$  and MeI, which shows the presence of  $[(\text{Py}2\text{ald})\text{Zn}]^+$  (m/z: 410.0847, simulated data, orange line; 410.0819, observed data, green line).

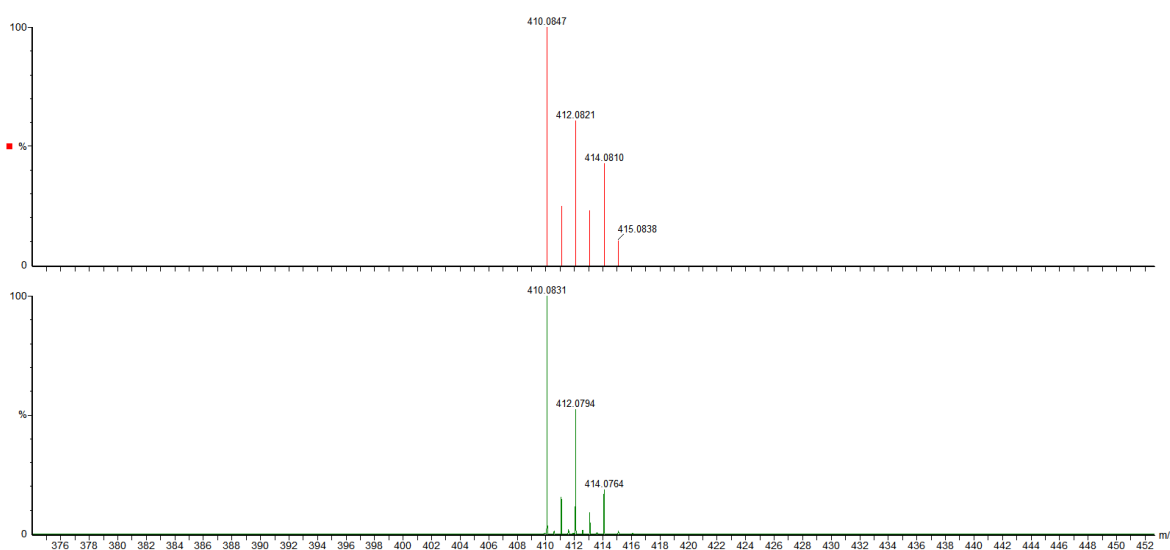

**Figure S146.** Mass spectrometric data (in MeCN) for  $[(\text{Py}2\text{ald})\text{Zn}]_2(\text{BF}_4)_2$  ( $5^{\text{Zn}}(\text{BF}_4)_2$ ) obtained from the reaction of  $[(\text{Py}2\text{ald})\text{Zn}(\text{SC}_6\text{H}_4\text{-}2,6\text{-Me}_2)]$  ( $1\text{b}^{\text{Zn}}$ ) with  $\text{S}_8$  and  $\text{PhCH}_2\text{Br}$  shows the presence of  $[(\text{Py}2\text{ald})\text{Zn}]^+$  (m/z: 410.0847, simulated data, orange line; 410.0831, observed data, green line).



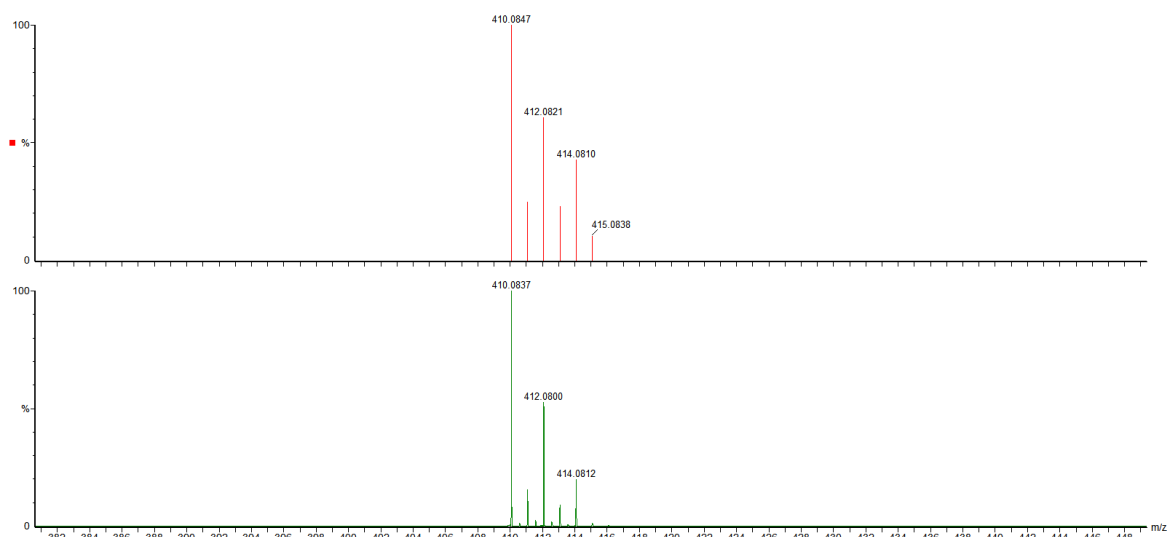

**Figure S147.** Mass spectrometric data (in MeCN) for  $[(\text{Py}2\text{ald})\text{Zn}]_2(\text{BF}_4)_2$  ( $5^{\text{Zn}}(\text{BF}_4)_2$ ) obtained from the reaction of  $[(\text{Py}2\text{ald})\text{Zn}(\text{SePh})]$  ( $2^{\text{Zn}}$ ) with  $\text{S}_8$  and MeI shows the presence of  $[(\text{Py}2\text{ald})\text{Zn}]^+$  (m/z: 410.0847, simulated data, orange line; 410.0837, observed data, green line).

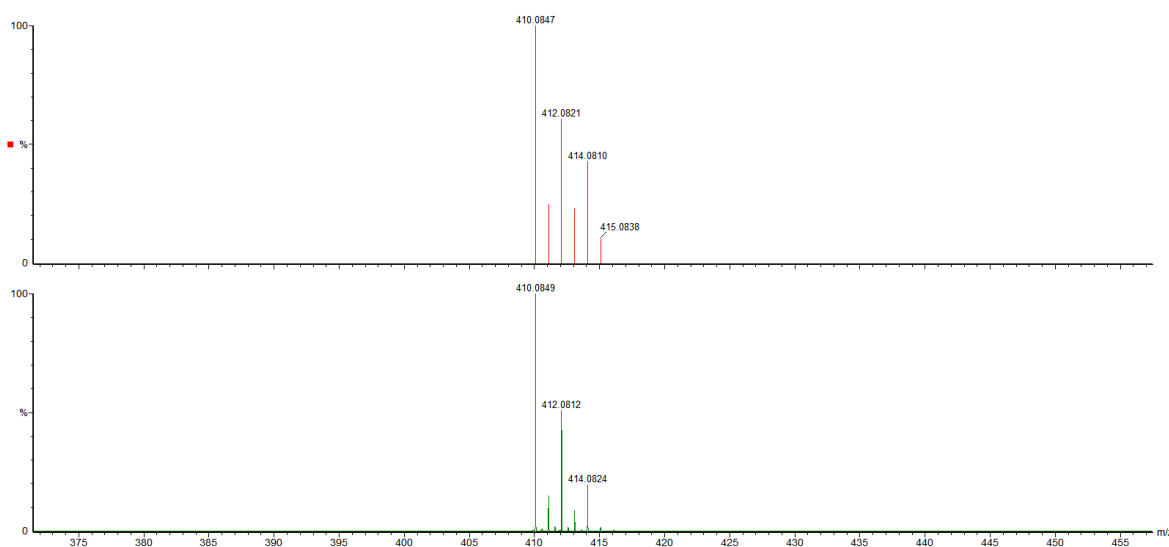

**Figure S148.** Mass spectrometric data (in MeCN) for  $[(\text{Py}2\text{ald})\text{Zn}]_2(\text{BF}_4)_2$  ( $5^{\text{Zn}}(\text{BF}_4)_2$ ) obtained from the reaction of  $[(\text{Py}2\text{ald})\text{Zn}(\text{SePh})]$  ( $2^{\text{Zn}}$ ) with  $\text{S}_8$  and EtBr shows the presence of  $[(\text{Py}2\text{ald})\text{Zn}]^+$  (m/z: 410.0847, simulated data, orange line; 410.0849, observed data, green line).

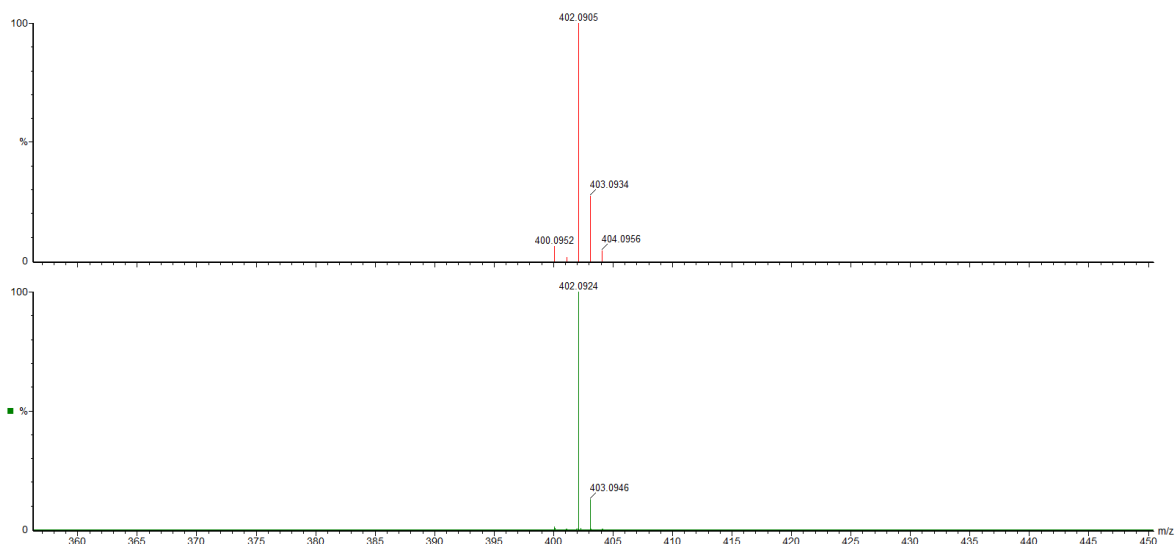

**Figure S149.** Mass spectrometric data (in MeCN) for  $[(\text{Py}2\text{ald})\text{Fe}]_2(\text{BPh}_4)_2$  ( $5^{\text{Fe}}(\text{BPh}_4)_2$ ) obtained from the reaction of  $[(\text{Py}2\text{ald})\text{Fe}(\text{SPh})]$  ( $1\text{a}^{\text{Fe}}$ ) with  $\text{S}_8$  and MeI, which shows the presence of  $[(\text{Py}2\text{ald})\text{Fe}]^+$  (m/z: 402.0905, simulated data, orange line; 402.0924, observed data, green line).

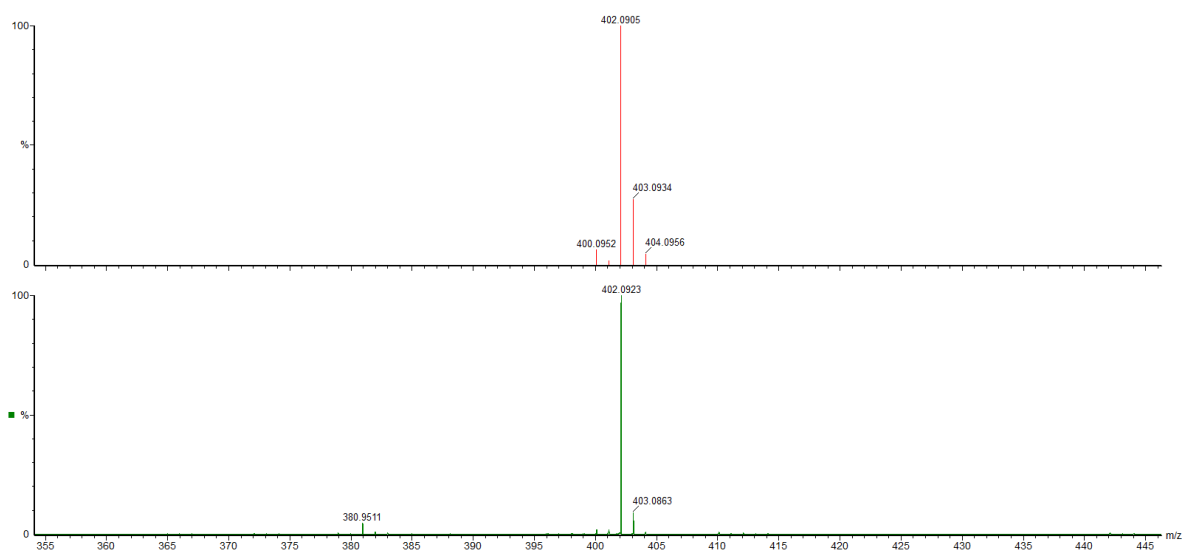

**Figure S150.** Mass spectrometric data (in MeCN) for  $[(\text{Py}2\text{ald})\text{Fe}]_2(\text{BPh}_4)_2$  ( $5^{\text{Fe}}(\text{BPh}_4)_2$ ) obtained from the reaction of  $[(\text{Py}2\text{ald})\text{Fe}(\text{SPh})]$  ( $1\text{a}^{\text{Fe}}$ ) with  $\text{S}_8$  and  $\text{PhCH}_2\text{Br}$ , which shows the presence of  $[(\text{Py}2\text{ald})\text{Fe}]^+$  (m/z: 402.0905, simulated data, orange line; 402.0923, observed data, green line).

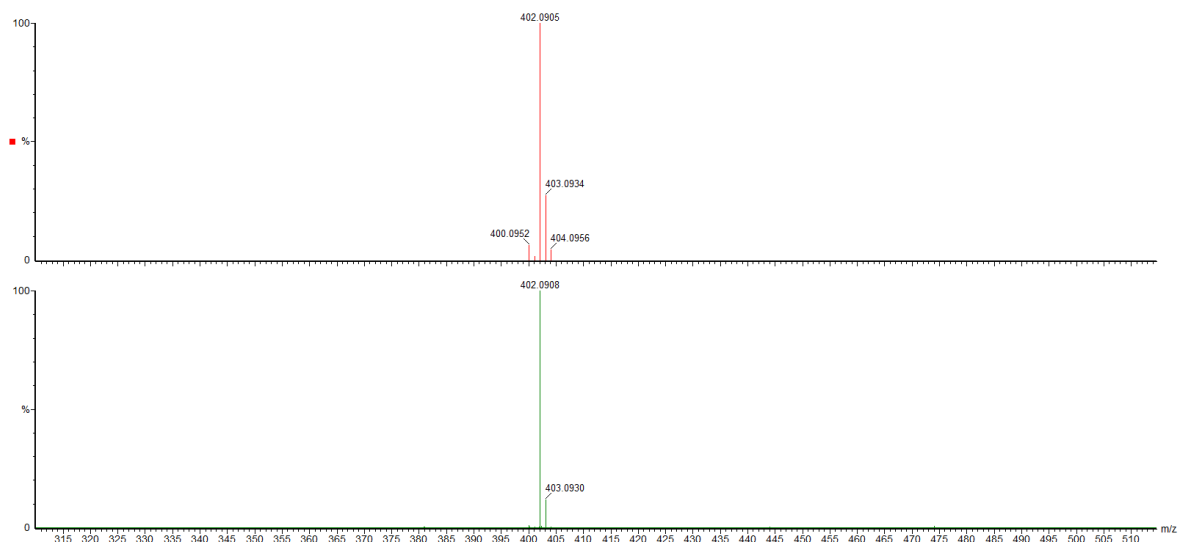

**Figure S151.** Mass spectrometric data (in MeCN) for  $[(\text{Py}2\text{ald})\text{Fe}]_2(\text{BPh}_4)_2$  ( $5^{\text{Fe}}(\text{BPh}_4)_2$ ) obtained from the reaction of  $[(\text{Py}2\text{ald})\text{Fe}(\text{SC}_6\text{H}_4\text{-}2,6\text{-Me}_2)]$  ( $1\text{b}^{\text{Fe}}$ ) with  $\text{S}_8$  and MeI, which shows the presence of  $[(\text{Py}2\text{ald})\text{Fe}]^+$  (m/z:402.0905, simulated data, orange line; 402.0908, observed data, green line).

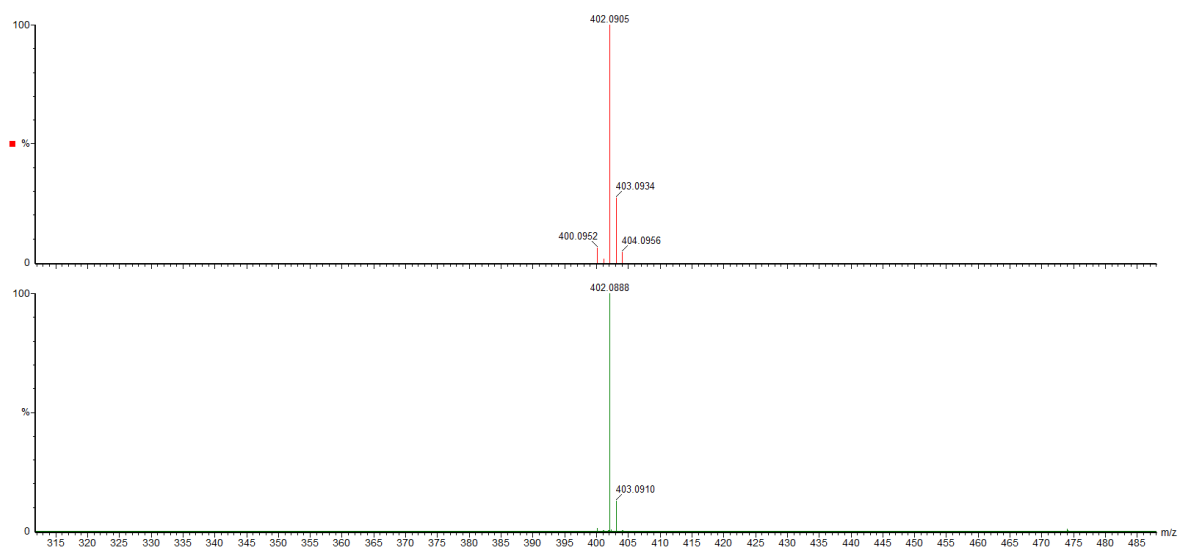

**Figure S152.** Mass spectrometric data (in MeCN) for  $[(\text{Py}2\text{ald})\text{Fe}]_2(\text{BPh}_4)_2$  ( $5^{\text{Fe}}(\text{BPh}_4)_2$ ) obtained from the reaction of  $[(\text{Py}2\text{ald})\text{Fe}(\text{SC}_6\text{H}_4\text{-}2,6\text{-Me}_2)]$  ( $1\text{b}^{\text{Fe}}$ ) with  $\text{S}_8$  and  $\text{PhCH}_2\text{Br}$  shows the presence of  $[(\text{Py}2\text{ald})\text{Fe}]^+$  (m/z: 402.0905, simulated data, orange line; 402.0888, observed data, green line).

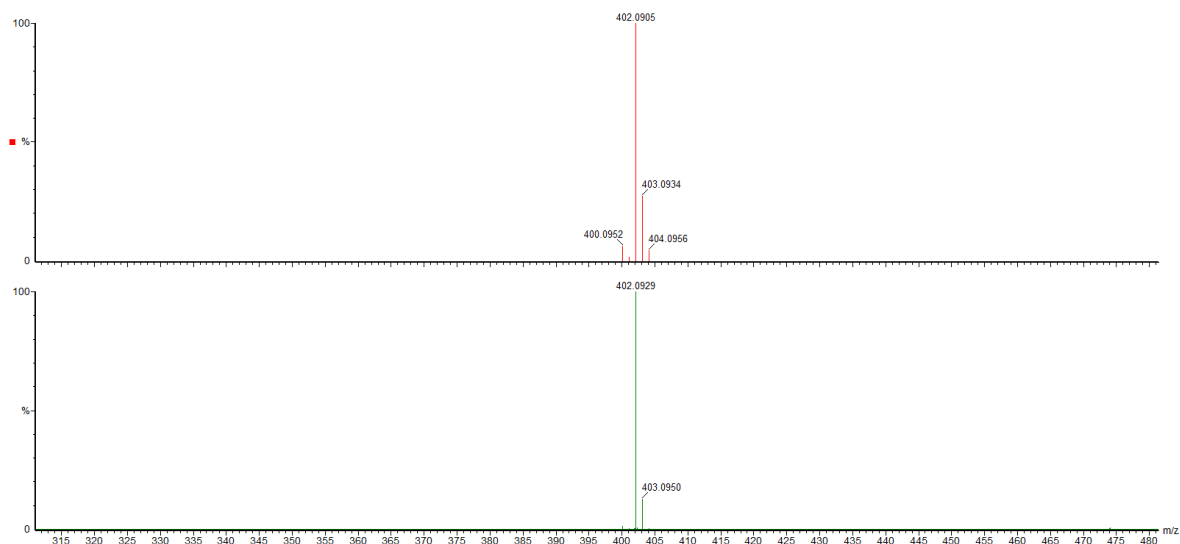

**Figure S153.** Mass spectrometric data (in MeCN) for  $[(\text{Py}2\text{ald})\text{Fe}]_2(\text{BPh}_4)_2$  ( $5^{\text{Fe}}(\text{BPh}_4)_2$ ) obtained from the reaction of  $[(\text{Py}2\text{ald})\text{Fe}(\text{SePh})]$  ( $2^{\text{Fe}}$ ) with  $\text{S}_8$  and MeI, which shows the presence of  $[(\text{Py}2\text{ald})\text{Fe}]^+$  (m/z: 402.0905, simulated data, orange line; 402.0929, observed data, green line).

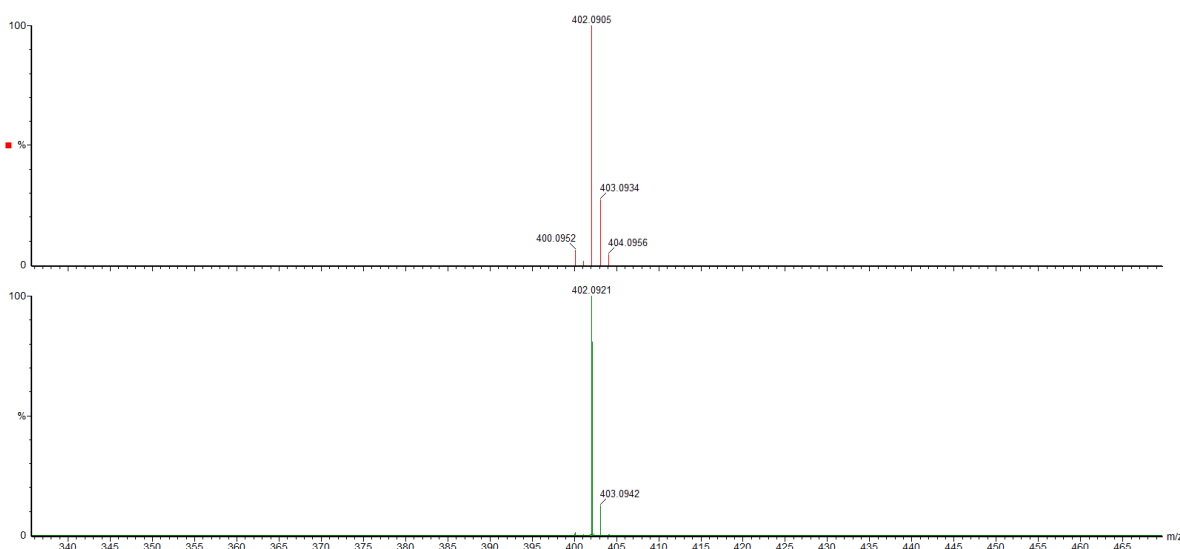

**Figure S154.** Mass spectrometric data (in MeCN) for  $[(\text{Py}2\text{ald})\text{Fe}]_2(\text{BPh}_4)_2$  ( $5^{\text{Fe}}(\text{BPh}_4)_2$ ) obtained from the reaction of  $[(\text{Py}2\text{ald})\text{Fe}(\text{SePh})]$  ( $2^{\text{Fe}}$ ) with  $\text{S}_8$  and EtBr, which shows the presence of  $[(\text{Py}2\text{ald})\text{Fe}]^+$  (m/z: 402.0905, simulated data, orange line; 402.0921, observed data, green line).
